# Supplementary material for: Bacillus cereus Decreases NHE and CLO Exotoxin Synthesis to Maintain Appropriate Proteome Dynamics During Growth at Low Temperature
Source: MDPI journal article supplement (doi:10.3390/toxins12100645), 2020-10-06
Supplement: s1 [file s1]

# Supplementary Material: *Bacillus cereus* Decreases Exotoxin Synthesis to Maintain Appropriate Proteome Dynamics During Growth at Low Temperature

Catherine Duport <sup>1,\*</sup>, Ludivine Rousset <sup>1,†</sup>, Béatrice Alpha-Bazin <sup>2</sup> and Jean Armengaud <sup>2</sup>

A.

TATAATTTTGTGTCTGTGAGTAAGTAGAGGTTTTTGTGTGATATATGGATATTTCAAT  
TGAAAAAGTAAAGTGGATTATATTTTAAAAATAAAGACATGAAAGCTTGAAAAATAAGGGA  
ATGAAAATACTTCTTTACGTTATATAAATAGCTGTGTTTAAATGACCTTACAGTACAAAA  
CTTATATGAAAAACAAAACGGAATTTTCATATTTATGTATGTGAATTAGTTTAAAAATGAATA  
ATATTTTATGTAATATATTCACGTGTATCAATGTGGGAAATAAGATGAAATAGAAAAATTT  
ATGCAATGTTATTCATACTAACCACATATGAAAAGTTTTATAACGATAAGTAAGTACTGT  
AGCAATAAAATTTGGGAGAGATGGTTCGTGTGTGAATCGCGGTGAGAACGTTCTCTATTT  
TAACCATCTCAAACATATGTGCAAGAAAATAGAATAATAAAATGCGATAGTAATAGTTACT  
AATACATAGGAGGAGTTAAAAGTGAAGAAAGACTTTAATTACAGGGTTATTGGTTACAGCAG  
TATCTACGAGTTGTTTTATTCTGTAAAGCGCTTACGCTAAGGAGGGGCAAACAGAAGTGA  
AAACAGTATATGCACAAAATGTAATTGCTCCAAATACATTATCGAATTC AATTAGAATGT  
TAGGATCACAGTCACCGCTTATACAAGCATATGGACTAGTTATTTTACAACAGCCAGACA  
TTAAGGTAAATGCGATGAGTAGTTTGACGAATCATCAAAGTTTGC AAAGGCAAATGTAA  
GAGAGTGGATTGATGAATATAATCCGAAGCTAATTGACTTAAATCAAGAGATGATGAGAT  
ATAGTATTAGATTTAATAGTTATTACAGTAAGCTCTATGAACTAGCAGGAAACATAAATG  
AAGATGAACAATCAAAGCAGATTTTACAAATGCATATGGAAACTACAATTGCAAGTAC  
AAAGCATCCAAGAGAATATGGAGCAAGATTTATTAGAGTTAAATCGATTTAAAACGGTAT  
TGGACAAAGATAGTAATAACTTATCAATTAAAGCTGATGAAGCAATAAAAACTGCAAG  
GATCAAGTGGAGATATTGTGAAATTAAGAGAAGATATTAAGAATTCAAGGGGAAATTC  
AAGCTGAATTAACGACTATTTTGAATAGACCTCAAGAAATTATTAAAGGCTCTATTAATA  
TCGGTAAACAAGTATTTACAATTACAAATCAAAGTGCACAAACGAAAACAATTGATTTTG  
TTTCTATCGGTACTTTAAGTAATGAAATTGTAAATGCTGCCGATAGTCAAACGAGGGAAG  
CGGCTCTTCGTATTCAGCAAAAACAAAAAGAGCTCCTACCACTTATTCAAAAATTATCAC  
AACTGAAGCAGAGGCGACACAAATTACATTCGTTGAAGATCAAGTAAGTAGCTTTACAG  
AACTAATTGACCGTCAAATTA

B.

ATGATAAAATAAACGGTTCTGGCAAGAAGCGTTGCACTAAGGCGACGCAACCATTAGTAA  
AAGAACGAAACAAAATAGATCAACCTCCTTATGTATATGTATTACAATTATTCGAGGTTG  
TTTCGTTTCATAACCTCTTAAAAATAGAAAATTCCTGATATTTTTAAAAAGGATTGAAATATG  
TTCAGAAGAGTGGTAGCATCATCACCTGACAGAAAAAGTTGCTTTTTCCCTAATATGA  
AATATTGCATATAAAAAATGAATTGATGCAAAATGTAAAAGCTTATTATAATGAAAGCATAA  
ATATACAACACATCTTAATACAGCAAAGAGGAGGAAGGAATATGGAAATCGCAATGGCAG  
TTTTAAAAATTTTAGGTGGAGTAATTCCTTTAGTTCAAGAACTTTTAAAAAGCGTTTATGT  
AAGTTTATTTCGTTAGCTATCATATATCCATCATTATTATATCTTACTAAAAAAGAACGG  
GGTGATTTTTCTGAATATTATGAAAAATTTTAAAGGGAAGAAAGTTCCTTACATGTGTAT  
TAGTTAGTCTATGCACTCTTAATTATTTCATCTATTTCTTTTCGCAGAAAACACAAGCCGGTC  
ATGCAAAATGATATAACTAAAAATGCTAGTAGCATTGATACTGGTATAGGGAATCTTACAT  
ATAATAATCAAGAGGTTTTAGCTGTAAATGGTGATAAAGTAGAGAGTTTTGTTCGCAAG  
AAAGTATCAATTCAAATGGTAAATTTGTAGTAGTGGAACGTGAGAAAAATCACTTACAA  
CGTCACCAGTCGATATTTTCGATTATTGATTCTGTAGCGAATCGTACGTATCCAGGAGCTG  
TACAACCTTGCCAATAAAGCTTTTGCAGACAATCAACCGAGTTTATTAGTGGCTAAGAGAA  
AGCCTTTTGAATAATTAGTATAGACTTACCTGGTATGAGAAAAGAAAAATACAATCACTGTCC  
AAAATCCGACATATGGTAATGTGGCTGGAGCAGTAGATGATTTAGTATCTACTTGGAATG  
AAAAGTATTCCACAACACATACGTTACCTGCAAGAATGCAGTATACAGAATCTATGGTGT  
ATAGTAAAGCACAAATCGCAAGTGCTCTTAATGTTAATGCTAAATATCTTGATAACAGTC  
TAAATATTGACTTTAATGCAGTTGCAAAATGGAGAAAAGAAAGTGATGGTGGCCGCATATA  
AACAAATATTTTATACTGTAAGTGCTGAACTACCTAACAAATCCATCTGATCTCTTTGATA  
ATAGTGTACTTTTGGTGAGTTAACTCGTAAAGGAGTAAGCAATTCGGCTCCACCTGTTA  
TGGTTTCAAATGTAGCTTATGGTAGAACGGTTTATGTAAAATTAGAAACAACATCTAAGA  
GTAAAGATGTACAAGCTGCTTTTAAAGCTTTACTTAAGAATAACAGCGTTGAAACGAGTG  
GGCAGTACAAAAGATATTTTTGAAGAAAGTACCTTTACTGCTGTCGTATTAGGTGGAGATG  
CGAAAGAGCATAAACAAGGTTGTACAAAAGATTCAATGAAATCCGAAATATCATTAAAG  
ATAATGCTGAATTAAGTTTTAAAAATCCAGCATATCCAATTTTATATACAAGCACGTTCT  
TAAAAGATAATGCAACTGCTGCTGTTTATAACAATACAGATTATATCGAGACGACAATA  
CAGAATATTCAAGTGCTAAATGACACTTGATCATTACGGTGCTTATGTTGCTCAATTTG  
ATGTATCTTTGGGATGAATTCACATTTGATCAAAATGGGAAAGAAATACTAACACATAAAA  
CATGGGAAGGTAGTGGCAAAGACAAAACAGCTCATTATTCTACAGTAATCCCTCTTCCAC  
CAAATTCAAAAATATAAAATCGTAGCAAGAGAATGTACAGGTCTTGCATGGGAATGGT  
GGAGAACAATTATTAATGAACAAAATGTTCCATTACAAATGAAATAAAGGTTTTCAATTG  
GAGGAACAACATTATACCCAACGGCTAATATTAGTCAT**TAG**

C.

AACATTAACATCCGGTACGATTTTTTATAGTACAGTTGAAGGATTACGTCCTCTTGACGC  
TTTATATTTTAGTGTGGTCACGTTGACGACTGTCGGTGATGCTAATTTTAGCCCCGAAAC  
TGATTTTGGAAAGATATTACAATCTTATACATATTTATTGGGATTGGATTAGTATTTGG  
ATTTATTTCATAAGTTGGCAGTTAATGTACAACTGCCGAGTATATTATCGAATAGAAAAAA  
AGAGTAAAGCATGTGGATGCTTTACTCTTTTTTTTACATTAGTTTATAGATAAGCCTTAATAA  
TAGTTTATTAGAA**TGAAAGTGATTTCAT**TATTATATTTCACTGTGTATAAAGTTATAATG  
ATATGAAAATCTGCATATTTTAAATTTAGTGATAGAAATTTCTGTAAGGTGGGATATTCT  
AGTCATAGGTTAACCGGACGACATCATAGGATCCTAACAAAAAGTTTACAATAATTCGAT  
TATAAA**ATGGAGGATTT**CAGATGAAAAAGAAAGTACTTGCTTTAGCAGCAGCTATTACAG  
TAGTAGCTCCTTTTACAAAGCGTTGCATTTGCTCATGAAAACGATGGGGGAAGTAAATAA  
AAATAGTTACCCGCTGGTCTGCTGAAGATAAACATAAAGAAGGCGTAAATTTCTCATTTAT  
GGATTGTAAACCGTGCGATTGATATTATGTCTCGCAATACAACACTTGTAAAAACAAGATC  
GAGTTGCACAATTAAATGAATGGCGTACGGAGTTAGAGAACGGTATTTATGCTGCTGACT  
ATGAAAATCCTTATTATGATAATAGCACATTTGCTTCACATTTCTATGATCCAGACAATG  
GAAAAACATATATTCCATTTGCAAAGCAGGCAAAAGAACTGGCGCTAAATATTTTAAAT  
TAGCTGGTGAATCATATAAAAAATAAGATATGAAACAAGCATTCTTCTATTTAGGATTAT  
CTCTTCATTATTTAGGAGATGTAAACCAACCGATGCATGCAGCAAACCTTACAAATCTTT  
CGTATCCACAAGGATTCCATTCTAAATATGAAAACCTTTGTAGATACGATAAAAGATAATT  
ATAAAGTGACGGATGGAAATGGATATTGGAAGTGGAAAGGTACAAATCCAGAAGAGTGGA  
TTCATGGAGCGGCAGTAGTAGCGAAACAAGATTACTCTGGAATTGTAAATGATAATACGA  
AAGATTGGTTTCGTAAAAAGCAGCTGTGTACAGAATATGCAGATAAATGGCGCGCTGAAG  
TTACGCCAATGACAGGTAAGCGATTAATGGATGACACAACGTGTTACTGCTGGATACATTC  
AGCTTTGGTTTGATACGTACGGAGATCGT**TAA**

**Figure 1.** Putative CRE sites. Nucleotides sequences of BCAH187\_A1995 (A), BCAH187\_A3327 (B), BCAH187\_AO804 (C) and their 500-bp upstream region. CRE sites are underlined. ORF sequences encoding NheA, CLO and PIC toxins are written in blue.
