# Supplementary material for: Bacillus cereus Decreases NHE and CLO Exotoxin Synthesis to Maintain Appropriate Proteome Dynamics During Growth at Low Temperature
Source: Toxins (Basel). 2020 Oct 6;12(10):645. doi: 10.3390/toxins12100645 (PMC7601483; doi:10.3390/toxins12100645)
Supplement: Supplementary file 1 [file toxins-12-00645-s001.zip]

Archive with 5 entries (5 files):
- Table S2 new.xlsx
- Table S3.xlsx
- Table S4.xlsx
- New Table S1.xlsx
- SUPP conv.pdf
