# Supplementary material for: Bacillus cereus Decreases NHE and CLO Exotoxin Synthesis to Maintain Appropriate Proteome Dynamics During Growth at Low Temperature
Source: Toxins (Basel). 2020 Oct 6;12(10):645. doi: 10.3390/toxins12100645 (PMC7601483; doi:10.3390/toxins12100645)
Supplement: Supplementary file 1 [file toxins-12-00645-s001.zip › New Table S1.xlsx]

## Sheet: Table S1
	Table S1: NASF values for proteins identified in the cellular proteome of B. cereus AH187 at 30°C and 16°C.
		Growth at 30°C									Growth at 16°C
		Early Exponential growth			Late Exponential growth phase			Stationnary growth phase			Early Exponential growth			Late Exponential growth phase			Stationnary growth phase
Gene names	Uniprot ID	30-EE1	30-EE2	30-EE3	30-LE1	30-LE2	30-L3	30-S1	30-S2	30-S3	16-EE1	16-EE2	16-EE3	16-LE1	16-LE2	16-LE3	16-S1	16-S2	16-S3
cesC	A1BYG6	0.00339581	0	0.00706668	0	0	0	0	0	0	0.00654253	0.026096	0.0132362	0.003545	0.00304816	0.00678689	0.0104	0.0288668	0.0342101
	A1BYM8	0.00856103	0	0.00890775	0	0	0	0	0	0	0.00824704	0.0146199	0	0	0.0153691	0	0	0.00808608	0.015681
cesD	Q20CI6	0	0	0.003999	0	0.0038946	0	0.00420638	0	0	0.0111071	0.0196901	0.0149806	0.0240731	0.0103496	0.0192033	0.0274648	0.0254109	0.0316789
hfq1	A1BZ20	0	0	0	0	0.0167192	0	0	0.0198411	0	0	0	0	0.0344479	0.02962	0.0329753	0.0168434	0.0155838	0
	A1BYH7	0	0	0	0	0	0	0	0	0	0	0	0	0	0	0	0.00234776	0.00868876	0.0147435
	A1BYI2	0	0	0	0	0	0	0	0	0.0131657	0	0	0	0	0	0	0	0	0
frmA	A1BYZ8	0	0	0.00299636	0	0	0	0	0	0	0.0527081	0.0418012	0.0505109	0.0420874	0.0491133	0.0402881	0.0558565	0.0516794	0.0474725
	A1BYQ6	0.0123183	0	0.0128172	0	0.00624131	0.0123013	0.00674094	0.00740674	0.00852661	0.0296663	0.0157773	0.0120036	0	0.00552861	0.0184646	0	0.00581747	0.00564079
cesT	A1BYG9	0.0207448	0.0048934	0.012951	0	0	0.00414323	0	0	0	0.039968	0.0425118	0.0363868	0.0259874	0.0297937	0.0414607	0.0169421	0.019594	0.0151991
	A1BYH6	0	0	0	0	0	0	0	0	0	0	0	0	0	0	0	0.00687781	0	0.0123404
	A1BYV1	0.0144493	0.0170419	0	0.0163645	0.0439261	0.0432879	0.0474425	0.0521283	0.0200033	0	0	0	0	0	0	0	0	0.0132332
	A1BYI3	0.00612507	0.00722406	0.0191194	0.284413	0.0931014	0.0244664	0.100554	0.530333	1.12776	0.0177013	0.0261499	0.00596859	0.0319708	0.02749	0.030604	0.0187586	0.00578527	0.00560956
	A1BZ19	0	0	0	0.0260411	0.0233002	0	0	0.0553019	0.095495	0	0	0	0	0	0	0	0	0
cesB	Q20CI8	0.017724	0	0.000392379	0.000427089	0.00382136	0	0.00123818	0	0.000522058	0.0457727	0.0473336	0.0440967	0.0381863	0.0402814	0.0267559	0.0184788	0.0224397	0.0217582
clpP	A1BYZ2	0.182154	0.195881	0.206255	0.303378	0.266017	0.219352	0.31663	0.309247	0.25217	0.273532	0.279047	0.308015	0.497762	0.428	0.492543	0.393786	0.389639	0.304207
	A1BYI8	0	0	0.00179904	0	0	0	0	0	0	0.0016656	0.00147635	0	0	0	0	0	0.0016331	0
	A1BYN6	0.0324176	0.0628132	0.0409585	0.136368	0.122014	0.131803	0.157124	0.153151	0.195541	0.00669184	0.0158172	0.00902554	0.0531799	0.0311772	0.0416507	0.0732795	0.0503029	0.055137
	A1BZ06	0	0	0	0	0	0	0	0	0	0	0	0	0	0	0	0.00157026	0.00332076	0.00241493
soxS	A1BYX0	0.00353333	0	0.00735286	0	0	0	0	0	0	0.00340374	0	0	0	0.0031716	0	0.00360705	0	0
rsfA_1	A1BYI7	0	0	0	0	0	0	0	0	0	0	0	0	0.0133095	0.0171662	0.00637024	0.0195231	0.0180631	0.0116763
	A1BYM9	0.0097698	0.00576137	0.0101655	0.00553236	0.00495005	0.00487814	0.00534631	0.0117487	0.00676255	0.00941147	0.0208552	0.00952021	0.0050995	0.021924	0.00976299	0	0.0046139	0.0223688
	A1BYH8	0.0227806	0.017912	0.0395054	0.1978	0.115422	0.0682473	0.174527	0.703137	0.746375	0	0	0	0	0	0	0	0	0
	A1BYW4	0.0262064	0.00772712	0.0272678	0.01484	0.0331949	0.0392552	0.0430227	0.0157573	0.0362796	0.00631131	0.0167825	0.00638423	0.00683942	0.0176426	0.0130941	0.0200649	0.00618813	0.0120004
fghA	A1BYZ9	0	0	0	0	0	0	0	0	0	0.00694762	0	0	0	0	0	0.00368131	0.00340601	0.00330257
	A1BYS9	0.0127642	0.00752719	0.00332028	0.007228	0.0129344	0.00955989	0.0139698	0.0153496	0.0176704	0	0	0	0.0133249	0.0114574	0.00637764	0.0162881	0.00904204	0.0175348
	A1BYS3	0	0.00105637	0	0	0	0.000894423	0.00196053	0.00215417	0.00495974	0	0	0	0	0	0	0	0	0
cesH	A1BYH1	0	0	0	0	0	0	0	0	0	0	0	0	0.0040037	0	0.00383254	0.0117457	0.0144898	0.00702486
	A1BYI0	0.0370986	0.052506	0.0386011	0.0882332	0.0507511	0.0444567	0.158351	0.26991	0.431411	0	0	0	0	0	0	0	0	0
	A1BYI4	0.131761	0.133968	0.0992777	0.0668942	0.0552491	0.0499093	0.0497266	0.0382466	0.0125798	0.122552	0.131904	0.115113	0.156522	0.130507	0.167992	0.0788511	0.0901201	0.0915442
	A1BZ01	0	0	0.00137559	0	0	0	0	0	0	0.00127356	0	0.00128827	0.00138012	0.00237339	0	0.00404889	0.0024974	0.00242155
	A1BZ18	0.0750002	0.0600244	0.0863989	0.14258	0.119429	0.101645	0.0967424	0.0901919	0.0778714	0.255453	0.242437	0.242744	0.260051	0.218796	0.294438	0.224226	0.240348	0.260033
	A1BYY5	0.0454076	0.0178516	0.0472466	0.017142	0.0766887	0.0604597	0.0828278	0.0728069	0.0209538	0	0	0	0	0.0135863	0	0.216323	0.157258	0.124758
repX	A1BYM7	0.0565298	0.0527825	0.0563685	0.0426817	0.0358024	0.0352822	0.0438242	0.0368226	0.0195647	0.0794157	0.0864815	0.0688571	0.0590133	0.0570852	0.0517829	0.0408774	0.0333711	0.0366719
cesA	A1BYG8	0.00624779	0	0	0.000336948	0.000904446	0	0.00130246	0	0	0.0312396	0.0294682	0.0324703	0.0251573	0.0232338	0.0115949	0.0100228	0.0112403	0.00790174
	A1BYV0	0	0	0	0	0.0023972	0	0	0	0	0	0.00201994	0	0	0	0	0	0	0
mrnC	B7HQS5	0.00750493	0.0088515	0.00780888	0.00849966	0.00760502	0.00749454	0	0	0	0.00722967	0.0128164	0.0073132	0.0156693	0.0134732	0.0149994	0	0.0141771	0.00687328
	B7HY30	0.0022714	0	0.00236339	0	0	0	0	0	0	0.00218809	0.00193946	0.00221337	0	0	0	0	0	0
	B7HUK8	0.00776626	0.0244259	0.0430976	0.00586376	0.00786984	0.015511	0.00566656	0.00622624	0.00716763	0.0523699	0.0397879	0.0554976	0.0216199	0.0232372	0.0284564	0.00792831	0.0122257	0.018967
	B7HVR6	0	0	0	0	0	0	0	0	0	0	0.00547423	0	0.00669278	0.00575477	0	0.0065449	0	0
ndk	B7HL25	0.103689	0.0896817	0.0719255	0.0156576	0.0350239	0.0207091	0.0378277	0.0332511	0.0382786	0.0865678	0.0944385	0.10104	0.108244	0.0930735	0.0967088	0.0564546	0.0848783	0.0823004
dnaI	B7HRL7	0	0	0.00333704	0.00363224	0.00324993	0	0	0	0	0.00308953	0.00547694	0	0.00334805	0.00287881	0	0	0.00302923	0.00587445
	B7HPN0	0	0	0.0054689	0	0	0	0	0	0	0	0.00897586	0	0	0.00471793	0	0	0	0
	B7HUQ8	0.0164549	0.0194073	0.00856066	0.0559077	0.0583603	0.0410803	0.0540276	0.0296819	0.0227798	0.00792569	0.0140502	0.00801726	0.0257667	0.0147703	0.0246651	0.0251973	0.023313	0.00753499
	B7I065	0	0	0	0	0	0	0	0	0	0	0	0	0	0.0101221	0	0.0575595	0.0745571	0.0206551
	B7HWZ6	0	0	0	0	0	0	0	0	0	0	0	0	0	0.00345588	0	0	0.00363645	0.007052
	B7HRC9	0.00516325	0.00608967	0.0161171	0	0.00523211	0	0	0	0	0.00497388	0.0132261	0.0100627	0.0215603	0.0278079	0.0257982	0.0210839	0.0292608	0.0283721
	B7HVG6	0.0120557	0.00710941	0.021952	0.00341341	0.00610825	0.00300976	0	0	0	0.0116136	0.0231614	0.0117477	0	0.00270537	0	0.00307682	0.00569345	0.0082808
rbsA	B7HW90	0.00211544	0	0.00440223	0	0	0	0	0	0.00292857	0.00203785	0.0018063	0	0.00220838	0.00189887	0	0	0.00199808	0.0019374
	B7HRV5	0.0204445	0.0120564	0.0106363	0.00578858	0.0103586	0	0	0	0	0.029542	0.0305494	0.0199222	0.0266784	0.0229393	0.0459681	0.0260889	0.0193103	0.0234048
hppD	B7HRX9	0.00545427	0.0064329	0.0113503	0.0030886	0.00552701	0.00272336	0.0119389	0.00327953	0	0.0551693	0.0652008	0.0425194	0.0540919	0.0685422	0.0899326	0.0473286	0.0721235	0.0724306
	B7HQ89	0.00243996	0	0.00761633	0.00276336	0	0.00243658	0.00534086	0	0	0.0070514	0.010417	0.00713287	0.0127358	0.0175213	0.0121913	0.0199269	0.0184368	0.0201114
	B7HS72	0	0	0.00495319	0.00359423	0.00160796	0.0015846	0.00173668	0.00190821	0	0.0183432	0.0216785	0.0139163	0.0115955	0.0185165	0.0110998	0.00647962	0.00599506	0.0145325
gmk	B7HLK4	0.0290801	0.0285815	0.0554727	0.0219563	0.014734	0.0193599	0.0159135	0.00582841	0.0134193	0.0513581	0.0496608	0.070843	0.025298	0.0522059	0.048433	0.0197912	0.022889	0.0399489
	B7HLV3	0	0	0	0	0	0	0	0.00658973	0.0151722	0	0	0	0	0	0	0	0	0
	B7HUU1	0.00338133	0	0	0	0	0.00337665	0.00370072	0	0	0.00325731	0.014436	0	0.00705976	0.00607032	0	0.00345188	0	0.00309674
	B7HL67	0	0	0	0	0	0	0	0	0	0	0	0	0	0	0	0.0200128	0.0370323	0.0179538
	B7HK60	0.0110214	0.00649944	0.0172016	0	0	0.0110061	0.0120624	0.0198807	0.0152577	0.0318514	0.0470537	0.0322194	0.0402694	0.0692512	0.0715889	0.033754	0.0364347	0.0504688
	B7HNH5	0.0033725	0	0	0	0	0	0	0	0	0.00649762	0.00575931	0.00657269	0	0.00302723	0	0	0.0031854	0.00308866
qoxC	B7HWC2	0	0	0	0	0	0	0	0	0	0.0049377	0.00437664	0	0	0	0	0.00523264	0.00968266	0.00469429
fadD	B7HRG9	0	0	0	0	0	0	0	0.00217579	0	0	0	0	0	0	0	0.00369412	0.0051268	0.00497109
	B7HXA6	0.00542167	0.00319723	0.00846187	0.00307014	0.00274699	0	0	0	0	0.00261141	0.00462936	0	0	0	0	0	0.00256044	0
sdhA	B7HRG0	0.074723	0.0778824	0.0831736	0.0255849	0.0246529	0.0381774	0.0247245	0.0208973	0.0144342	0.0853744	0.0830925	0.0778941	0.0689352	0.057714	0.0590421	0.0780561	0.0755015	0.0907148
	B7HKH0	0	0	0	0	0	0	0	0	0	0	0.00464923	0	0.00284207	0.00244375	0.00272057	0.0111171	0.0154286	0.01496
	B7HQT5	0.015341	0	0.00532076	0	0	0	0	0	0	0.0098522	0.00436636	0.00498302	0	0.00459013	0.00511009	0	0	0.00468327
	B7HNM5	0	0	0	0	0	0	0	0	0	0	0	0	0	0	0	0.015884	0.0146962	0
	B7HN30	0.00760923	0.00448726	0.0197935	0.00430889	0.00385536	0.00379935	0.00832797	0.0228763	0.00526702	0.0109952	0.00649724	0.00370742	0	0.00341511	0.00380196	0	0	0
	B7HTZ4	0.143517	0.117185	0.0918948	0.118778	0.117463	0.143318	0.114784	0.0663795	0.0764159	0.0957135	0.0895511	0.0968194	0.109485	0.0891857	0.0937724	0.0676205	0.0469228	0.0556083
	B7HZA5	0.0137397	0.00972295	0.0171554	0.00933647	0.0111383	0.00548826	0.018045	0.00330454	0	0.0317658	0.032849	0.0294551	0.0172119	0.0197329	0.0164761	0.0252474	0.0285503	0.0352332
	B7HV44	0.0631194	0.043426	0.0492568	0	0.0053301	0	0.00575679	0.0189761	0.0145635	0.0152011	0.0179651	0.0102511	0.0219641	0.0377716	0.0262814	0.0161091	0.0298088	0.038538
sdaAB2	B7HNQ5	0.00475694	0	0.0049496	0	0	0.00475036	0	0	0	0.00916494	0.0162471	0.00927083	0.00496592	0.0128098	0.0142609	0.00971239	0.00898607	0.0130697
	B7HNA8	0.00462227	0.00545162	0	0	0	0.00461588	0.00505888	0.00555854	0.00639897	0	0	0.00450419	0.028952	0.0373415	0.0323333	0.0471872	0.0218292	0.0253995
	B7HXS4	0	0	0	0	0	0	0	0	0	0	0	0	0.00560137	0.00240816	0.0053619	0.0027388	0	0.00245702
aspS1	B7HQ11	0.00465274	0	0.00242059	0.00526943	0.0023574	0.0046463	0.00254611	0.00839277	0	0	0	0	0	0	0	0.00474982	0.00439462	0.00426115
	B7HZD1	0	0	0	0	0	0	0	0	0	0	0	0.0034037	0	0	0	0	0	0.00319896
	B7HZ96	0	0	0	0	0	0	0	0	0	0.00184877	0	0	0.00200348	0	0.00191782	0	0	0
sap	B7HXP4	0.867227	1.16497	0.806935	0.620164	0.532321	0.584765	0.592139	0.726241	0.770759	0.133768	0.0917227	0.105953	0.160005	0.0964234	0.1008	0.117686	0.0804268	0.0983799
gyrB	B7HPS1	0.0606515	0.0470617	0.0548042	0.0415758	0.0404344	0.054192	0.0314434	0.034549	0.0176767	0.0984033	0.102213	0.083987	0.0749794	0.0759324	0.0558242	0.0391054	0.0467339	0.0599321
recA	B7HLB4	0.280809	0.251462	0.270539	0.123678	0.105391	0.14021	0.12521	0.106309	0.136781	0.365689	0.315257	0.364847	0.390861	0.340749	0.374151	0.31852	0.284877	0.280988
rocB	B7HVK9	0	0	0	0	0	0	0	0	0	0.00178405	0.00316267	0.00360933	0.00193334	0	0	0.0189062	0.0314862	0.0237455
	B7HLC2	0.0235009	0.022174	0.0244527	0.0159695	0.0119072	0.0234684	0.0128604	0.0141306	0.00976023	0.0226389	0.0421397	0.0183204	0.02208	0.0316424	0.025833	0.0719737	0.110986	0.107615
	B7HZ50	0.0258648	0.0305056	0	0.0390574	0.0262098	0.0430483	0.0283079	0.0311038	0.0238711	0.0332215	0.04417	0.0336054	0.0270011	0.0541726	0.0516935	0.0352059	0.0325732	0.0394798
lipM	B7HNX2	0.0142914	0.0252835	0.0260229	0.00809283	0.0108615	0.0107037	0.00391034	0.00429656	0	0.00688363	0.00915219	0.0174079	0	0.00320708	0.00357036	0	0.00337464	0
	B7HVU7	0.0030986	0	0.00322409	0.0035093	0.00313993	0.00618862	0	0	0	0.00298495	0.00529156	0.00603888	0	0	0	0	0	0
	B7HV13	0	0	0	0.00186585	0.00500838	0	0	0.00594358	0.00912298	0	0	0	0	0	0	0	0	0
divIVA	B7HLN0	0.197605	0.178222	0.211655	0.184303	0.188462	0.197331	0.222631	0.181718	0.265514	0.173561	0.163765	0.186893	0.157748	0.198242	0.168428	0.11273	0.126258	0.175651
tal1	B7HYW5	0.0238994	0.02255	0.0198939	0.0108268	0.0145309	0.00954653	0	0	0	0.032232	0.0285695	0.0279466	0.0149696	0.0214526	0.0191062	0.0341573	0.0361176	0.0437759
mutM	B7HRM5	0.0144871	0	0.00753693	0.0123055	0.00367009	0.0108503	0.00792777	0	0	0.00697789	0.00927752	0.00352926	0.00756178	0.00325099	0.0108578	0.0073947	0	0.00663392
ald1	B7HV97	0.0741561	0.0807337	0.0623211	0.00969058	0.0115608	0.00284821	0.00312156	0	0.00394846	0.0384657	0.0340949	0.0277929	0.00893237	0.00256016	0.00570034	0	0	0.00261211
	B7HKG8	0	0	0	0.00787182	0.00352163	0.0104114	0.00760709	0.0125376	0	0.0334782	0.0237393	0.033865	0.0616752	0.0592703	0.0764028	0.0603125	0.0722146	0.0763869
spoIID	B7HY44	0	0	0	0	0	0	0	0.0110964	0.0127742	0	0	0	0	0	0	0	0	0
	B7HV59	0.00912181	0.00478155	0.00738207	0.0195138	0.0123246	0.0101213	0.0177483	0.0524097	0.0855899	0.00585816	0.0129813	0.0148146	0	0	0.00101283	0	0	0
	B7I026	0	0	0	0	0	0	0	0	0	0	0	0	0	0	0	0.0043586	0.00268844	0.00130339
pdhB	B7HMU1	0.276876	0.353446	0.338928	0.173388	0.151837	0.149631	0.135471	0.101846	0.0901883	0.244755	0.247539	0.27615	0.159822	0.131574	0.17252	0.123037	0.153832	0.122311
smC	B7HLI1	0.012663	0.00298701	0.0096623	0.00191219	0.00256638	0.00337213	0	0	0	0.0065059	0.00504582	0.00822633	0.00264386	0.00303109	0.000843612	0.000861815	0.000797366	0.00231945
	B7HL58	0.00592389	0	0.0123276	0.00670907	0	0.0059157	0	0	0	0.0171199	0.0101164	0.00577255	0	0.00531742	0.00591976	0	0.00559525	0.0108506
	B7HPX2	0.0962569	0.0832537	0.0801242	0.0581414	0.0780325	0.0704907	0.0491629	0.0540186	0.0177674	0.0989082	0.0712315	0.100051	0.0870875	0.0864023	0.0769518	0.0655102	0.0666723	0.0705244
	B7HW67	0.00275776	0.00487886	0.0057389	0.00312329	0.00419181	0.00137697	0	0	0	0.0106265	0.0129511	0.0120929	0.00287891	0.00371314	0.00413376	0.0028153	0.00390715	0.00757697
	B7HPF5	0.00341469	0.00201369	0.00532948	0.00193364	0.00346023	0.00511495	0.00373723	0	0	0.0427629	0.0495665	0.0499118	0.0320823	0.0352487	0.0290046	0.0453172	0.051604	0.057855
trpS	B7HZV4	0.112232	0.121338	0.13624	0.289523	0.240094	0.242833	0.21837	0.138714	0.159687	0.08409	0.0665491	0.066834	0.0683448	0.0587661	0.065423	0.0668347	0.0677258	0.0713792
	B7HMT7	0	0	0	0.00747183	0.00668537	0.00988238	0.00361028	0	0	0	0	0	0	0	0	0	0	0
sufC	B7HUX2	0.304234	0.284261	0.304222	0.156617	0.14814	0.169662	0.12108	0.109282	0.0875167	0.414873	0.428458	0.427366	0.284602	0.265994	0.30797	0.225877	0.2575	0.256917
citZ	B7HRN4	0.0694707	0.0504218	0.0750644	0.0181566	0.0216607	0.021346	0.026319	0.0128527	0.00739798	0.0849404	0.0935406	0.0729033	0.0557867	0.0551633	0.0774325	0.0572817	0.0731878	0.0587296
	B7HK89	0.0461104	0.0634477	0.0239889	0.026111	0.0467254	0.0460466	0.0252329	0.0184834	0	0.0074032	0.0459339	0.0224662	0	0.0275931	0	0	0	0
	B7HPR0	0	0	0.00836257	0.0182047	0.00814426	0.00802595	0.0263887	0.0289951	0.0111263	0.0232269	0.0137251	0.0156635	0.0335606	0.0504998	0.0642517	0.0246143	0.0303648	0.0147213
	B7HU55	0.0108919	0.0256924	0	0	0.0220743	0.0326305	0.0119207	0	0.0150785	0	0	0.0106136	0.0113704	0	0.0108843	0	0	0
	B7HX08	0	0	0	0	0	0	0	0	0	0.00688127	0.0137236	0.00696077	0.00559281	0.00480897	0.00356914	0	0.00337349	0.00327103
	B7HYP3	0	0	0	0	0	0	0	0.00730445	0.00840886	0	0	0	0	0	0	0	0	0
	B7HN41	0.0546511	0.0515655	0.0492825	0.0412632	0.03692	0.0291069	0.0518381	0.0481953	0.0554823	0.0105293	0.00622194	0.00355033	0.00380346	0.0065408	0.00364086	0.0148777	0.0137651	0.013347
	B7HVZ7	0.140664	0.188673	0.15784	0.103081	0.100616	0.0991546	0.0845217	0.0630188	0.0534557	0.175359	0.162498	0.198886	0.129568	0.0816995	0.113004	0.0901011	0.0911784	0.0934611
	B7HMG0	0	0	0	0	0	0	0	0	0	0	0	0	0	0.0198064	0.0147	0	0	0.00673608
	B7HSL7	0.0933253	0.0841713	0.122809	0.0746082	0.0611923	0.0767497	0.0480661	0.0462119	0.0417992	0.121633	0.131249	0.128387	0.0687707	0.0788432	0.0740596	0.0560426	0.0648146	0.0930122
	B7HRZ3	0	0	0	0	0	0	0	0.0106364	0	0	0	0	0	0.00793933	0	0.00902939	0	0
hom2	B7HYG5	0.0490666	0.0202546	0.0714754	0.0722411	0.0621513	0.0465488	0.0724968	0.0560551	0.0373597	0.0898073	0.0712235	0.0741103	0.0819555	0.0726714	0.0784518	0.115208	0.111227	0.101108
	B7HY77	0.00554032	0.00653439	0.0115294	0.00627466	0.00561421	0	0.00606364	0	0	0.0213485	0.0236534	0.0269939	0.0231349	0.0198925	0.0221458	0.0113118	0.0156989	0.010148
	B7HZK8	0	0	0	0	0	0	0	0	0	0.00900808	0	0	0.0195237	0.0167874	0	0.0190923	0.00883228	0.00856403
	B7HNA1	0.293461	0.422018	0.262491	0.431482	0.313026	0.308479	0.447962	0.838919	1.20453	0.089273	0.068139	0.0777621	0.107492	0.0947378	0.131194	0.0972335	0.114276	0.0966601
	B7HZQ3	0.10927	0.145686	0.113696	0.322835	0.255155	0.24196	0.29118	0.359932	0.414352	0.0549197	0.0527359	0.0555542	0.138869	0.1322	0.142427	0.11155	0.0897464	0.0913717
	B7HTZ1	0.0124142	0.0109812	0.0193754	0.0140596	0.00628988	0.00929776	0.0033967	0	0	0.020928	0.0344501	0.0272183	0.00971967	0.0111433	0.0155069	0.00950491	0.00879411	0.00568468
fba2	B7HY95	0.407796	0.445665	0.43599	0.27965	0.26538	0.239108	0.237489	0.224953	0.201993	0.385631	0.39612	0.470291	0.281204	0.288808	0.272921	0.217701	0.208488	0.239846
	B7HLM6	0.023608	0.0198885	0.0315825	0.00763918	0.00683511	0.0134716	0	0.00405571	0	0.025991	0.0345566	0.0295777	0.0176037	0.0060546	0.0134809	0.0137718	0.0191128	0.0154436
gerM	B7HQP5	0	0	0	0	0	0	0	0.00356913	0	0	0	0	0.01859	0.0186487	0.0118635	0.00605976	0.0056066	0.0108726
recJ	B7HQG8	0.00520785	0.0046067	0.00812815	0	0	0.00260032	0	0	0	0.0125421	0.00889358	0.012687	0.00135916	0.00467468	0.00260211	0	0.00245946	0.00119238
	B7HTU6	0.00861541	0.0101612	0.0179287	0.00487867	0.00436516	0.00430174	0	0.00518025	0.00596349	0.0248983	0.0257473	0.0251859	0.0089939	0.0232002	0.0129141	0.00879517	0.0162749	0.0118355
	B7HST0	0	0	0	0	0	0	0	0	0	0	0.00531397	0	0	0.0055863	0	0.0063533	0.00587818	0.00569966
	B7HRT6	0.00932058	0.0109929	0.00969807	0	0	0	0	0	0	0.0179575	0.0132642	0.0151374	0.0064867	0	0.00620939	0.00317169	0.011738	0.00853612
	B7HKQ4	0	0	0	0	0	0	0	0	0	0	0	0.00441931	0	0.00814174	0.00906402	0	0.00428357	0.00415347
pepD	B7HS50	0.0273853	0.0173917	0.0263025	0.0167004	0.0106733	0.0210364	0.00922215	0.00759976	0.00583254	0.0649375	0.0737472	0.0574768	0.0241901	0.0302543	0.048417	0.0279566	0.051732	0.0463023
	B7HMU6	0.0154352	0	0.00803016	0	0	0	0	0	0	0.0111518	0.0164744	0.0188011	0	0.00346374	0	0	0.00728944	0.00706805
	B7HKV6	0	0	0	0	0	0	0.00659684	0.0326178	0.0584103	0	0	0	0.00314615	0	0	0.00615326	0	0
	B7HZY1	0.0777182	0.0666638	0.0808658	0.240053	0.243424	0.197554	0.317039	0.390835	0.371679	0.0408369	0.0482623	0.0481936	0.0958839	0.114155	0.112966	0.0721271	0.0533866	0.0582358
	B7HQD3	0.00472683	0	0.00491827	0	0	0.00472029	0	0	0	0.00455346	0.00807213	0.00460607	0	0	0	0	0	0
	B7HR14	0	0	0.00619177	0	0	0	0	0	0	0.0171975	0.0101623	0.0115975	0.00621219	0.00534154	0.00594661	0	0	0.00544992
	B7HX27	0.0143191	0.00562943	0.0198654	0	0.00483669	0.00953285	0.00522388	0	0	0.00919594	0	0.00465109	0	0	0	0	0	0
	B7HRK3	0.00826254	0	0.00859718	0.00467885	0.00418637	0.00412555	0	0	0	0.0079595	0.00705508	0.0120772	0.00431276	0.011125	0.00412839	0	0.00780416	0.00756713
	B7HKD9	0.0876615	0.107219	0.104725	0.0845722	0.0723805	0.0745712	0.0533009	0.0390436	0.0224734	0.137616	0.146929	0.139206	0.057619	0.0582866	0.071378	0.0464025	0.0367992	0.0505489
	B7I074	0.00254279	0.00299903	0	0	0	0	0	0	0	0.0146972	0.010856	0.00991132	0.0079635	0.00456493	0.00762305	0.00259584	0.00720517	0.00465756
gyrA	B7HPS2	0.0497183	0.0395813	0.0426788	0.038008	0.0302288	0.0446845	0.0244865	0.0224208	0.00688288	0.0802237	0.0774759	0.0799393	0.0532	0.0635952	0.0447152	0.0494867	0.045786	0.0557788
	B7HNG4	0	0	0	0	0	0	0	0	0	0.00307367	0.00681103	0.00155459	0	0	0.00318847	0	0.00150684	0.00438323
	B7HLP9	0	0	0	0.011751	0.0105142	0.0310843	0.0227117	0.0249549	0.014364	0.00999523	0	0.0101107	0.0108316	0.0279406	0.0207371	0	0.0196003	0.019005
	B7HL03	0.00316178	0	0.00328983	0.00358085	0.00320395	0.0031574	0	0	0	0.00304581	0.00809917	0.003081	0	0.00283808	0	0	0.00298637	0.00868701
	B7HVP7	0	0	0	0	0	0	0	0	0	0	0.00563659	0	0	0.00296273	0.00989502	0	0.00623506	0.00604569
	B7HV12	0	0	0	0	0	0	0	0	0	0	0.00672497	0	0	0	0	0	0	0
	B7HZJ2	0.00325624	0	0	0	0	0	0	0	0	0	0.00556076	0	0	0	0	0	0	0
	B7I025	0	0	0.000906365	0	0	0.00086988	0.0028601	0.00209506	0	0	0	0	0.0172777	0.0172019	0.00870478	0.0248993	0.0230373	0.0231354
	B7HUZ1	0	0	0	0	0	0	0	0	0	0	0	0	0	0	0	0.0861516	0.079709	0.0110412
lolD	B7HWV0	0.00597157	0	0	0	0	0	0	0	0	0.00575255	0.0101978	0.00581902	0	0	0	0	0	0
	B7HSN6	0	0	0	0	0	0	0	0	0	0	0	0	0	0	0	0.0454935	0.0315685	0.0204065
proC1	B7HVK8	0	0.00929559	0.00410033	0	0	0	0	0.00473895	0	0	0	0	0	0	0	0	0	0
glgP	B7HTX5	0	0	0.00128427	0.00139788	0	0	0.00135087	0.00148429	0	0	0.00210782	0	0.00128851	0.00221584	0	0.0100803	0.0151555	0.0101736
	B7HMV8	0.113254	0.103892	0.0785608	0.0997621	0.0892616	0.100531	0.0688623	0.0453982	0.0871038	0.109101	0.0859589	0.134886	0.144503	0.124251	0.0880253	0.102771	0.0831999	0.0921977
	B7HK99	0.190176	0.191069	0.197878	0.630193	0.870774	0.759651	1.17175	1.2536	0.955591	0.0814225	0.0721707	0.0892269	0.154413	0.145416	0.133734	0.122239	0.0931391	0.0903103
cshB	B7HPI5	0.0137441	0.00810504	0.0190676	0.01816	0.0162486	0.0114375	0.0150423	0.00826399	0	0.0573732	0.0625895	0.0558039	0.0382609	0.0267301	0.0228908	0.0257232	0.0194723	0.0209788
	B7I047	0.0954707	0.0866158	0.168109	0.158028	0.20093	0.212678	0.289353	0.273775	0.264335	0.0636709	0.0438948	0.0787191	0.130331	0.145025	0.139437	0.0749713	0.0971107	0.0941613
	B7HY19	0	0	0	0	0	0	0.0422317	0.0464029	0.0534189	0	0.016474	0	0	0.0346365	0.01928	0.019696	0.0364462	0
	B7HTG8	0.0515512	0.0629722	0.047892	0.0521286	0.0410447	0.0367713	0.155157	0.21919	0.346636	0	0	0	0	0	0	0	0	0
	B7HUG1	0	0	0	0	0	0	0	0	0	0.00505142	0.00447744	0.0102196	0.00547411	0.00941381	0.00524009	0.0160595	0.00990567	0.00960482
	B7HU01	0.222844	0.16338	0.275737	0.518404	0.433323	0.318768	0.672355	0.796705	0.658691	0.295898	0.241705	0.234758	0.641316	0.632528	0.692141	0.534918	0.409586	0.36405
	B7HZB2	0	0	0	0	0	0.0164019	0	0	0	0.0158222	0.00701219	0.0240075	0.00857309	0.0294862	0.00820658	0.0167673	0.0155134	0.0376056
	B7HVC6	0.0227302	0.0114894	0.0202721	0	0.00658094	0.00648534	0.00355388	0.0039049	0	0.0344088	0.0415895	0.0411347	0.00677964	0.0145736	0.0162245	0.00994475	0.0153351	0.0208171
	B7HVI8	0.00189731	0.00223773	0.00592244	0.0902488	0.0826722	0.102313	0.0706016	0.114081	0.133956	0	0.00162004	0	0	0.00170306	0	0	0	0
	B7HZV7	0.016956	0.00799933	0.0176427	0.00768136	0.0103093	0.013546	0.0185576	0.0040781	0	0.0228677	0.0173737	0.0330456	0.0283214	0.0273961	0.0135553	0.0242337	0.0256245	0.0155289
	B7HN71	0.0780552	0.0690452	0.0541443	0.0810342	0.0790962	0.0714516	0.085428	0.10951	0.117063	0.0313301	0.0666484	0.0570458	0.0611132	0.0759028	0.0780007	0.0929644	0.0860123	0.101271
	B7HP10	0	0	0	0.0142094	0.00762828	0.00501164	0.00274631	0.00603513	0.00347381	0.00725178	0.00642778	0.00733556	0.0314344	0.0202716	0.0300905	0.0179315	0.0237008	0.0275772
moaE3	B7HSQ8	0	0	0	0.00735459	0	0	0	0	0	0.00625569	0.0110897	0.00632797	0	0	0	0	0	0
	B7HUJ9	0	0	0	0	0	0	0	0	0	0	0	0	0	0	0	0.0354738	0.0358047	0.0289311
ribF	B7HLE2	0.0155692	0.0146902	0.0259196	0	0.00946611	0.0093286	0.00681593	0.00374457	0.00862147	0.0389953	0.0345643	0.0273086	0.00975191	0.0195654	0.0124467	0.00317881	0.0117644	0.00855531
spoIVB	B7HNT6	0	0	0	0	0	0	0	0	0	0	0	0	0	0	0	0.00251054	0	0.0045045
mecA	B7I0A3	0.0042555	0	0.00442784	0	0	0	0	0	0	0.00819883	0.0145344	0.0124403	0	0.00381983	0.00850506	0	0.0120582	0.00779467
hup3	B7HKT3	0.306663	0.375597	0.343628	0.360667	0.382465	0.412244	0.206541	0.156022	0.130627	0.261329	0.100711	0.321816	0.184693	0.201157	0.117865	0.108367	0.111404	0.118822
	B7HUS1	0	0	0.0066022	0.00718624	0	0	0.00694457	0.0305219	0.0439209	0.0183375	0.0325077	0.0247325	0.0529918	0.0512605	0.0570671	0.0259104	0.0179796	0.0523006
	B7HP83	0.0638687	0.0664662	0.082092	0.0170198	0.00761418	0.0187589	0.0699016	0.0768057	0.104022	0.00361919	0.00320795	0.00732201	0.00392203	0	0	0	0	0
menB	B7HTW5	0.1311	0.14098	0.13641	0.0960733	0.0820537	0.06931	0.0675217	0.0649169	0.0373661	0.0854328	0.0724329	0.0826625	0.0764805	0.0484559	0.0886237	0.0590452	0.0619136	0.0459077
	B7HQ68	0	0	0	0	0	0	0	0	0	0	0	0	0.00504907	0.00217071	0.00483321	0.0246875	0.034262	0.0354362
sodA1	B7HPH5	0.0303793	0.0418018	0.0421462	0.0114686	0.0153922	0.0101124	0.0221659	0.0182664	0.0140188	0.0438976	0.0562028	0.0542725	0.0422852	0.0363588	0.0607162	0.036182	0.0382586	0.0370966
mreB	B7HQL0	0.165543	0.20651	0.198748	0.144219	0.119361	0.136702	0.0940743	0.0650823	0.0572937	0.141071	0.168534	0.139599	0.0897314	0.0714401	0.0858953	0.068249	0.0511175	0.064143
	B7HXV0	0.00335796	0	0	0	0	0	0.00735028	0.00403813	0.00464868	0.00646959	0.00286724	0.00327217	0.0245383	0.0241134	0.0369118	0.0308522	0.0444033	0.0369041
thiD2	B7HZ97	0.04682	0.0184069	0.0690146	0.0353504	0.0316296	0.0428589	0.0256212	0.0234598	0.0162041	0.0451027	0.0533037	0.0418218	0.0122192	0.0175111	0.00389894	0	0.0110556	0.0107198
	B7HT27	0	0	0	0	0	0	0	0	0	0.0233436	0.0289676	0.0236133	0.0354158	0.0522037	0.0532741	0.0544236	0.0411985	0.0577015
	B7HPZ8	0.032407	0.0318513	0.0365294	0.00917558	0.0109464	0.0188779	0.0118227	0.0032476	0	0.039023	0.0438126	0.0473686	0.025373	0.024241	0.0242883	0.0165416	0.0178553	0.0296795
	B7HUT0	0.0257991	0.033809	0.0238613	0.0129861	0.0087144	0.0085878	0.00941201	0.0103416	0.00793683	0.0331372	0.0391625	0.03352	0.02394	0.025731	0.0315103	0.0175583	0.0243678	0.0210024
murI	B7HXL2	0	0.00448805	0.0039594	0	0	0	0	0	0	0.00366572	0.00324919	0.00370807	0	0.00341571	0	0	0	0
cotZ1	B7I0D3	0	0	0	0.0080699	0.028882	0.0284624	0.0311941	0.0685501	0.029593	0	0	0	0	0	0.0213615	0.349159	0.424	0.417648
	B7HV58	0	0	0	0	0	0	0	0	0	0	0	0	0	0	0	0.121413	0.1348	0.108921
soJ	B7HZG6	0.0293427	0.0148318	0.0261695	0.0332319	0.0254863	0.0167441	0.0229388	0.0151227	0.00580305	0.0403807	0.0429508	0.0408472	0.0218798	0.0188133	0.0167556	0.0128378	0.0118778	0.0153561
	B7HND3	0.0237783	0.0186965	0.00412355	0	0.00401591	0.00791513	0.0130122	0.00476579	0.00548636	0.0190885	0.0101517	0.0115854	0.00827431	0.00711464	0.00792057	0.00404574	0.00748638	0.00725901
	B7HLC1	0.0256498	0.0165011	0.0485247	0.0237678	0.0165403	0.0232857	0.0178644	0.0196288	0.00322809	0.0381867	0.0338476	0.0272667	0.041382	0.0376753	0.0326224	0.0856962	0.0858949	0.108913
	B7HUU3	0.373408	0.503322	0.18039	0.468212	1.16219	0.865641	1.12387	1.02639	0.941566	0.0770813	0.0797099	0.129953	0.51511	0.418975	0.306514	0.762399	0.59202	0.47633
	B7HQ93	0	0	0	0	0	0	0.011859	0.0130303	0	0	0	0	0.0113115	0.00972618	0.0108279	0.0331847	0.0307031	0.0297706
sigF	B7HN52	0.00393297	0	0.00818451	0.0222713	0.0119563	0.0196376	0.0301313	0.0378369	0.0272236	0.00757744	0.0134329	0.00383249	0.049269	0.0494245	0.0668139	0.0200752	0.0148591	0.0288157
	B7HNV8	0	0	0	0	0	0	0	0	0	0	0.00437258	0	0	0	0.00511737	0	0	0
	B7HT51	0.0116898	0.00459575	0.0202721	0.0220653	0.0157943	0.0155648	0.0298526	0.0421729	0.0269718	0.0187684	0.0266173	0.0113912	0.0650845	0.0629581	0.0700899	0.079558	0.0809694	0.0713729
	B7HS43	0	0	0	0	0	0	0	0.00902789	0.0103929	0	0	0	0.00783707	0.00673868	0.00750202	0	0.00709077	0.0137508
phnA	B7HUT4	0.0188281	0.0111032	0.029386	0.0106618	0.0286188	0.0470051	0.0103033	0.0226418	0.0130326	0.00906877	0	0	0.00982763	0	0	0.00961048	0.00889178	0
dal1	B7HRZ1	0	0	0	0	0	0	0	0	0	0	0	0	0	0	0	0.021471	0.0248316	0.019262
tagU	B7HX99	0.0135827	0.0120148	0.0141328	0.015383	0.0103229	0.00339097	0.00743282	0.0163339	0.00940177	0.0163556	0.0173966	0.0165446	0.00708969	0.0152401	0.0101799	0.00693303	0.0160364	0.0186592
ldh1	B7HUZ0	0.0131911	0.0155579	0	0	0	0.00329322	0	0	0	0.00317683	0.00281585	0	0	0	0	0	0	0
	B7HZV8	0.0211663	0.00713258	0.0314621	0.0136981	0.0153204	0.0090587	0.0132375	0.00363623	0.00418602	0.0262157	0.0258187	0.0206255	0.0189395	0.0135709	0.0181299	0.0185211	0.019992	0.0249233
	B7HWF0	0.0925521	0.083688	0.109141	0.0593976	0.0500195	0.0677776	0.0540236	0.0296797	0.0341672	0.0653822	0.0605872	0.0450938	0.0386472	0.0415384	0.0554925	0.0409427	0.0553644	0.0593338
	B7HTQ8	0	0	0	0	0	0	0	0	0	0	0	0	0	0	0	0	0	0.00689595
	B7HNC0	0.00306052	0.00360965	0	0.0138647	0.0124053	0.00611256	0.0100488	0.0736088	0.114397	0.00589653	0.00522652	0	0	0.00274719	0	0	0.00578145	0.00560586
	B7HSW6	0.0102612	0.00302559	0.0106768	0	0.00519905	0.00256176	0.00561525	0.00308493	0.00710272	0.0123561	0.00657127	0.00749933	0	0	0	0	0.00242299	0.0023494
	B7HZ43	0.00228258	0.00269213	0	0.00517025	0.00231302	0.00227942	0.00499637	0	0.00315995	0.00439773	0.00389802	0.0066728	0.00476572	0	0.00228099	0.00466041	0.00646785	0.00418094
	B7HRX6	0.00356463	0.00840842	0.011127	0.0040371	0	0.00355969	0.00390133	0.00428666	0	0.0274711	0.0365244	0.0208414	0.0111637	0.0223978	0.0142486	0.007278	0.0101006	0.0163231
spoIIP	B7HNK9	0	0	0	0	0	0	0	0	0	0	0	0	0.00277324	0	0.00265468	0.00542393	0	0.00243295
	B7I080	0.00205481	0.0024235	0	0.00232717	0.00208222	0.00410394	0	0	0	0.0039589	0.00175453	0.00200232	0	0	0.00205338	0	0	0
	B7HY37	0.067251	0.0339932	0.0699746	0.0181344	0.022716	0.028782	0.0210295	0.00770219	0.0177335	0.0308497	0.0410165	0.0374474	0.0100293	0.0229966	0.00960058	0	0	0.0029329
	B7HY18	0	0	0	0	0	0	0	0	0	0.00635871	0.00563618	0.00643217	0.0137816	0.00592503	0.0197886	0.0134771	0.0187038	0.0120905
	B7I0C4	0.00440286	0	0.00916235	0	0	0.00879353	0.019275	0.00529468	0.00609522	0	0	0	0.0459628	0.0395211	0.0439979	0.0943892	0.0956478	0.0927428
mutTA	B7HTP9	0.0123758	0	0.025754	0.00700805	0.0188112	0.00617932	0.00677238	0.00744127	0	0.0238437	0.0422688	0.0361788	0.0193792	0.0277719	0.0247343	0.006317	0.0058446	0.0113342
bioC	B7HNN2	0.00735031	0.00866913	0.003824	0	0	0.00734013	0.0040223	0	0	0.00708072	0.00941423	0.00716253	0.00383661	0	0.00734518	0	0	0
	B7HSM4	0.0109239	0.0128839	0.0170494	0.0154647	0.0138369	0.00818156	0.00597785	0.00656827	0.00378069	0.0210464	0.0349781	0.0212896	0.0142547	0.0122569	0.00818718	0.00278795	0.00773837	0.0150067
	B7HN68	0.0580058	0.0439801	0.112088	0.0187697	0.0251912	0.0331003	0.0181385	0.01993	0.0172075	0.0678522	0.0707557	0.0524865	0.0129759	0.0334718	0.0124211	0.0211486	0.0430475	0.0417401
fabD	B7HLI5	0.0613489	0.0643168	0.0567409	0.0347402	0.0241761	0.0170178	0.0298417	0.0204932	0.014155	0.0393992	0.0378326	0.049818	0.0426961	0.0305934	0.0306531	0.0104382	0.0225343	0.0249714
	B7HLK6	0	0.00396498	0.00349794	0	0	0	0	0	0	0	0	0.0032759	0	0	0.00335944	0.00343193	0.00635057	0.00615769
	B7HY85	0	0	0.00317922	0	0	0	0	0	0	0.00588681	0.00782685	0.00297741	0.0031897	0.00274266	0	0	0	0.00559662
	B7HZU2	0	0	0	0	0	0	0	0	0	0	0	0	0	0	0	0.0230981	0.0427416	0.0414435
	B7HZ25	0	0	0	0	0	0	0	0	0	0	0.00250239	0	0	0	0	0	0	0.00805204
	B7HV01	0.125934	0.123775	0.136494	0.126779	0.111662	0.111787	0.134001	0.130409	0.101699	0.12974	0.125452	0.105673	0.105904	0.0942011	0.0978805	0.112492	0.115644	0.118539
	B7I0D9	0.00718015	0.00846844	0.0298838	0.0325273	0.0509313	0.0430212	0.0785836	0.0345381	0.0497002	0.0484176	0.0551777	0.0419803	0.0749558	0.0644506	0.0645762	0.0366498	0.033909	0.039455
phaC	B7I0M3	0.0743359	0.0714378	0.0773465	0.0498896	0.0474283	0.0577368	0.0451986	0.0430411	0.0304915	0.122001	0.108139	0.118045	0.114965	0.0815535	0.112802	0.143342	0.130022	0.148766
	B7HK59	0.0606609	0.0592802	0.0829547	0.0490723	0.0456634	0.0536539	0.0398345	0.0396004	0.0239936	0.113533	0.122831	0.113156	0.0578979	0.0606735	0.0467629	0.05308	0.0654807	0.074603
cspC	B7HX20	0.0303406	0.0536766	0.0315694	0.103086	0.153726	0.0757465	0.166032	0.164188	0.14701	0	0	0.0147827	0.063347	0.0817031	0.0303194	0.185842	0.171944	0.152828
	B7HUB9	0	0	0	0	0	0	0	0	0	0	0	0	0	0	0	0.0257548	0.0238288	0.0154034
	B7HNZ9	0	0	0.00220171	0	0	0.00211308	0	0	0	0.0285376	0.0325221	0.0164956	0.0309256	0.0284907	0.0422907	0.0237618	0.0279807	0.0310067
	B7HR30	0.0106607	0.00419117	0.0110925	0	0.00360097	0.00354865	0	0	0	0.0171162	0.0151713	0.00692557	0.0148387	0.00318976	0.0177555	0.0108831	0.00335643	0.00650898
	B7HZE8	0	0	0	0	0	0	0	0	0	0	0	0	0	0	0	0.00279676	0.00258761	0.00250902
	B7HZM9	0	0	0	0	0	0	0.00369657	0.012185	0.0140274	0.00325366	0.0115358	0.00329125	0.0141037	0.0212223	0	0.00344801	0.00319016	0
	B7HKB4	0	0	0	0	0	0	0	0	0	0	0	0	0	0	0	0.00862174	0.015954	0.00773471
	B7HK75	0.0631726	0.0518312	0.091452	0.0653244	0.0584486	0.0877707	0.0601215	0.0561507	0.0456286	0.0873146	0.0680123	0.0856469	0.0688152	0.0714978	0.049405	0.0420592	0.0544794	0.0679176
lysS2	B7HSB4	0	0.00222677	0.00392896	0	0	0	0	0	0	0.00909385	0.00967264	0.00735913	0	0	0	0	0.00178327	0.00345823
	B7HZE9	0.00391559	0.00461814	0.00814834	0	0	0	0	0	0	0	0	0	0	0	0	0	0	0
	B7HQN4	0.00294965	0	0.00920734	0	0	0.00294557	0	0	0	0.0085244	0.0201488	0.0114972	0	0	0	0	0	0
	B7HY13	0.00911974	0.00358535	0.00316303	0.0103285	0.00924137	0.0151785	0.0133082	0.00731133	0.00420839	0.00292842	0	0	0.00634692	0.00545739	0.00303779	0.00310334	0.00287127	0
	B7HUV0	0.00819768	0.00483428	0.0127945	0	0	0.00818634	0	0	0	0.00789702	0.0104995	0.0119824	0.00427891	0	0.00409598	0.00418436	0	0.00750773
ppk	B7HMW6	0.00566423	0.0050104	0.00589363	0.0032075	0.00143494	0.0028282	0.00154981	0	0	0.00954885	0.0193459	0.0165586	0.00295654	0.00762651	0.00707535	0.00433681	0.00668749	0.00518751
	B7HNI8	0	0	0	0	0	0	0	0	0	0	0	0	0	0	0	0.0613839	0.0615263	0.0504796
	B7I0I6	0	0	0	0	0	0	0	0.00953086	0.0109719	0	0	0	0	0	0	0	0	0
	B7HT38	0	0	0	0	0	0	0	0	0	0	0	0	0	0	0	0.00458912	0.00849187	0.00411698
	B7HZU8	0	0	0	0	0	0	0	0	0	0	0	0	0	0	0	0.00343751	0.0159022	0.00925156
	B7HTV6	0	0	0.004432	0	0	0	0	0	0	0	0.0109111	0	0	0	0.00425652	0	0.00402318	0.00390099
	B7HTS5	0.0032763	0.00128805	0.00568164	0.00371055	0.00331999	0.00654352	0.0167336	0.0144464	0.0196544	0.00315613	0.001865	0.0021284	0.00228015	0.00196058	0.00109134	0	0.00412605	0.00300055
	B7HNU6	0.0815297	0.0769265	0.0593821	0.110803	0.140449	0.122125	0.0981538	0.0882395	0.0564339	0.0863933	0.132269	0.111226	0.161712	0.146366	0.171093	0.141492	0.130911	0.0970681
	B7HRQ2	0.00471073	0.00277798	0.00490152	0	0	0.00235211	0	0	0	0.00907591	0.00402232	0.00918077	0.00491768	0.00211423	0.00470745	0.00240451	0.00444939	0.00215713
	B7HSB1	0	0	0	0	0	0	0	0	0	0	0.00361838	0.00825879	0	0	0	0	0	0
	B7HSZ2	0	0	0	0	0	0	0	0	0	0	0.00381577	0	0	0	0	0	0	0
cysK2	B7HML2	0.0140327	0.00827527	0.0219016	0.0158927	0.00710994	0.01051	0.0115187	0	0	0.0168976	0.0149775	0.0170928	0.0109869	0.0125961	0.0105172	0.00716276	0.0231949	0.0128517
	B7HTP2	0	0	0	0	0	0	0	0	0	0.00297682	0	0	0	0	0	0.0410103	0.0583745	0.0537715
fbp1	B7HUV3	0.0530313	0.0312732	0.0586277	0.00750753	0.0167933	0.00992961	0.00725506	0.00797163	0.00458846	0.0957867	0.118864	0.100123	0.0276805	0.023801	0.0298093	0.0169181	0.0313058	0.0273195
	B7HQ51	0.00470464	0	0	0	0	0	0	0	0	0	0	0	0	0.00422299	0.00470136	0.0048028	0.00444363	0
	B7HYZ0	0.00867028	0.00340865	0.00300714	0	0	0	0	0	0	0.00556819	0.00493549	0.00844878	0.00301706	0.00518843	0.00288808	0	0.00545952	0.0052937
nadK1	B7HSH9	0.0566883	0.0490304	0.070781	0.064202	0.0574443	0.0566098	0.0372257	0.0136342	0.0104637	0.0691716	0.0903542	0.0699707	0.0276167	0.0271385	0.0415424	0.0115742	0.0214173	0.0207669
rpe	B7HLJ3	0.0792133	0.0583913	0.0412107	0.0504633	0.0551855	0.0593278	0.0379293	0.0357219	0.0342691	0.0429232	0.0549553	0.0578922	0.0516833	0.0399958	0.0494738	0.0353789	0.0467617	0.0362732
	B7HVZ6	0.155872	0.192196	0.147441	0.112338	0.086155	0.12028	0.100806	0.0937223	0.0882759	0.102378	0.120994	0.144986	0.0591708	0.0890363	0.0637213	0.0723292	0.0669202	0.058399
	B7HNN3	0.0122396	0.00481189	0.0127353	0.00462062	0.00826855	0.00407421	0.00446523	0.00490626	0	0.0157209	0.0139346	0.0159025	0.00851819	0.00732435	0.00815403	0.00416499	0.00385352	0.00373648
pyn2	B7HN65	0.0571305	0.0410146	0.0671979	0.0731423	0.0679607	0.0768955	0.086994	0.0537673	0.0412645	0.0478567	0.0381769	0.0387277	0.0492681	0.0646595	0.0570907	0.0887517	0.0633456	0.0727961
	B7HWA6	0.0342968	0.0462292	0.0458818	0.108205	0.0769558	0.083177	0.163551	0.324059	0.501929	0.0283191	0.0292848	0.0167103	0.025574	0.0131938	0.0146884	0.0125044	0.0115693	0.00897436
	B7HQJ0	0.028047	0.0132317	0.0350194	0.0127058	0.0170526	0.0112033	0.0184177	0.0134912	0.015531	0.016211	0.0095793	0.0109322	0	0.0201405	0	0.00572643	0.00529819	0.00513728
spo0F	B7HY96	0.0498903	0.0588418	0.0519108	0.178926	0.278056	0.249106	0.300315	0.27998	0.264757	0.0640806	0.0709991	0.0567183	0.0868034	0.097029	0.0664739	0.0509312	0.0235612	0.0380761
pepF1	B7I0A6	0.0636709	0.0693185	0.0730444	0.0721101	0.0562482	0.0570614	0.0553907	0.0471186	0.0316416	0.154125	0.133824	0.135225	0.151683	0.13189	0.125621	0.151665	0.129529	0.16148
	B7HQL3	0	0	0	0	0	0	0.00357212	0	0	0	0	0	0	0.00585938	0	0	0	0
celF	B7HX37	0	0	0	0	0	0	0	0	0	0	0	0	0.00730437	0.0041871	0.0116535	0.0452388	0.0484646	0.0448566
lexA	B7HKQ5	0.0137656	0.0162355	0.0190975	0.0103934	0.0139492	0.0137466	0.00502196	0.00551797	0.00635227	0.0221012	0.0235079	0.0312992	0.00479012	0.0123563	0.00917067	0.0187371	0.00433398	0.0084047
	B7HMY0	0	0	0	0	0	0	0.00429534	0.00943917	0	0	0	0	0.00819409	0.00704567	0.00784379	0	0	0
	B7HS66	0.0165486	0.00975894	0.0258283	0.0249894	0.025154	0.0302972	0.024149	0.0199007	0.015273	0.0584528	0.0635862	0.0537529	0.0633441	0.056942	0.0551237	0.0450505	0.0442866	0.0479935
eag	B7HXP5	0.752535	0.894955	0.950056	0.615061	0.627851	0.844178	0.871662	0.77827	0.706683	0.868713	0.548319	0.614758	1.17446	0.755426	0.738223	0.951333	0.689463	0.642103
fabI	B7I0D1	0.239928	0.239066	0.241036	0.168659	0.155099	0.169369	0.149405	0.134314	0.120261	0.255038	0.22959	0.286201	0.224558	0.196799	0.272831	0.181589	0.183638	0.170484
	B7HTD8	0	0	0.00371821	0.00404713	0	0.0107056	0.0117331	0.0214866	0.0098941	0.0103273	0.0122051	0.00696438	0.0223828	0.035284	0.0249969	0.0182402	0.0236266	0.0327272
aspA3	B7HWM9	0.013259	0.0104253	0.0160953	0	0	0.00220677	0	0	0	0	0	0	0	0	0	0	0	0
aspB	B7HL59	0.0716827	0.0563629	0.0745858	0.0541225	0.0430451	0.0477223	0.0348683	0.0191561	0.0220524	0.099744	0.108813	0.0724384	0.0526594	0.0548115	0.0610204	0.0325237	0.0376144	0.0461978
ribD	B7HNM6	0	0	0.00294417	0	0	0	0	0	0	0.00272579	0.00241607	0.00551457	0	0	0	0	0	0
calY	B7I0I7	0.0476215	0.0312033	0.0550557	0.113859	0.123322	0.0951111	0.249016	0.209981	0.263704	0.132527	0.162649	0.190776	0.215425	0.284974	0.354268	0.0810251	0.15493	0.290756
acuA	B7HSK0	0	0.0055023	0	0.00528359	0	0	0.0051059	0.00561021	0	0	0	0.00454606	0.00974038	0.00837525	0.00932397	0.0190503	0.00881284	0.00854519
	B7HXK5	0	0	0.0112745	0.00613595	0	0	0	0	0	0.0104383	0.0138783	0.00527944	0.0113117	0.00972636	0.0162422	0.0442471	0.0562901	0.0645042
asnO3	B7HQ45	0.0547114	0.058997	0.0585537	0.0265556	0.0237605	0.0265373	0.0153975	0.0131587	0.00865614	0.0331287	0.0347033	0.0289417	0.0212141	0.0224504	0.0124967	0.00957479	0.0132881	0.0171794
	B7HWD7	0.230697	0.372334	0.404279	1.19636	1.18117	1.23677	1.0764	1.0951	1.05897	0.222236	0.248822	0.260299	0.494339	0.512248	0.55814	0.334673	0.321114	0.222401
	B7HZ83	0.0080525	0.00633154	0.0391002	0.0729585	0.0652792	0.0455677	0.0411279	0.0581014	0.0408749	0.1267	0.137515	0.133395	0.168125	0.173474	0.174349	0.137009	0.14451	0.167161
	B7HQF7	0.00242902	0	0.00252739	0.00275097	0.00246141	0.00727697	0.00265846	0	0	0	0.00622214	0.00236696	0.00253573	0.00218034	0.00242732	0.0024797	0.00458852	0.00222458
	B7HTP3	0	0	0	0	0	0	0	0	0	0	0	0	0	0	0	0.0121216	0.0112151	0.0108745
	B7HPJ6	0.0048975	0	0	0.00554663	0.00496282	0	0	0	0	0.00943574	0.0292725	0.0143171	0.00511265	0.0131883	0.00978816	0.00499968	0.00925159	0.0134559
	B7I066	0	0	0	0	0	0	0	0	0	0	0	0	0	0	0	0.0249502	0.0461687	0.0447665
	B7HNZ8	0.00668673	0	0.00695754	0.00757301	0.0135518	0.0133549	0.00731834	0	0	0.00644148	0	0.0130318	0.013961	0.0360129	0.0400924	0.00682624	0.0126315	0.00612394
rho	B7HY92	0.0405985	0.039433	0.0447276	0.0216374	0.02662	0.0238484	0.0209098	0.00861564	0.0033061	0.0506122	0.055057	0.0395613	0.0324098	0.0342985	0.0357972	0.0146279	0.0360905	0.028433
	B7HKI7	0.00634923	0	0	0	0	0	0	0	0	0.00611636	0.0162641	0.0309351	0.0265126	0.0512929	0.0507584	0	0.00599699	0.0174446
	B7HLJ6	0	0	0.00429499	0	0.00418286	0	0	0	0	0.0159057	0.0105738	0.00402236	0	0.00741043	0.00412493	0	0.00389881	0.0037804
	B7HUG8	0	0	0	0.00784978	0.00526766	0.00692151	0.0265503	0.0312564	0.0575716	0.00166922	0.00295911	0.00168851	0.0108534	0.0186645	0.0259735	0	0.00327329	0.0126955
	B7HVV7	0	0	0	0	0	0	0	0.0162346	0.0467229	0	0	0	0	0	0	0	0	0
	B7HLP5	0	0	0	0	0	0	0	0	0	0	0	0	0	0	0	0.127611	0.094454	0.12593
	B7HYS5	0.151596	0.178796	0.105157	0.286148	0.392578	0.302772	0.387135	0.425371	0.443049	0.0162262	0.0287649	0	0.158255	0.181434	0.201986	0.171954	0.159095	0.0925578
sucD	B7HLG8	0.268397	0.281863	0.271616	0.170724	0.160205	0.13952	0.160958	0.132642	0.117068	0.297513	0.317077	0.275871	0.214939	0.207917	0.242491	0.180163	0.177108	0.168361
	B7HM96	0.0165008	0.0097307	0.017169	0.00934391	0.00836041	0.0247169	0.0180594	0.0198431	0.0114216	0	0.00704469	0	0.00861283	0	0	0	0	0.00755599
nusA	B7HLE9	0.0976032	0.111827	0.110261	0.0726405	0.059343	0.0556961	0.0518852	0.0368887	0.0115817	0.110142	0.111913	0.119567	0.0611346	0.075095	0.0836015	0.0597838	0.0632149	0.061295
	B7HPH9	0	0	0	0	0	0	0	0	0	0	0.00612374	0	0	0.0128752	0.00716681	0	0	0
	B7HX91	0.0680177	0.0524527	0.0435522	0.0237025	0.00795286	0.0156747	0.00858951	0.00629192	0.00362162	0.113405	0.0960516	0.104518	0.0791987	0.0657506	0.0731987	0.0667662	0.0790698	0.0646889
sspH1	B7HVB8	0	0	0	0	0.0178645	0	0	0	0	0	0	0	0	0	0	0.0179972	0.0499539	0.0322912
	B7HPP8	0.0127308	0.00750751	0	0.0144182	0.0322515	0.0127132	0.0139333	0.0153095	0.00881211	0.0306597	0.0217407	0.0310139	0.0132901	0.0114274	0.00636096	0.00649821	0.00601226	0
	B7HP26	0	0	0	0	0	0	0	0	0	0	0	0	0.0143295	0.0123212	0	0.0140129	0	0
	B7HZE7	0	0	0	0.0191905	0.0343412	0	0.0185451	0	0	0	0	0	0	0	0	0	0	0
	B7HSG1	0	0	0	0	0	0	0	0	0	0	0	0	0.0425783	0.0183054	0.020379	0.187369	0.134833	0.130738
	B7HWB4	0.00204179	0	0.00212448	0.00231241	0.00413804	0.00203896	0.0312851	0.0343751	0.0508789	0	0	0.00198962	0	0	0	0	0	0
	B7HX26	0.0181218	0.0170986	0.0414825	0.00410474	0.00367269	0.0144773	0.00793339	0.00871696	0	0.0314228	0.0340417	0.0282541	0.0189179	0.0227731	0.0253528	0.00369997	0.0273862	0.0199159
	B7HNQ2	0.00637629	0	0.00663453	0	0	0	0	0	0	0.0153561	0.0136112	0.0155335	0.00665641	0.0171705	0.00955777	0.0130187	0.0150564	0.0233585
	B7HZB3	0	0	0	0	0	0	0	0	0	0	0.00401975	0.00229373	0	0	0	0	0	0.00215575
gerE	B7HQQ2	0	0	0	0	0	0	0.014748	0.048614	0.0186548	0	0	0	0	0	0	0.371421	0.560015	0.34555
	B7I0E1	0	0	0.00847004	0	0	0	0	0	0	0.0039209	0.00695075	0.0039662	0	0	0	0	0	0
metH	B7HPF4	0	0	0	0	0.00184701	0.000910091	0	0	0	0.0140468	0.0140071	0.0159853	0.00761111	0.0106346	0.00728573	0.00465184	0.00602555	0.00667719
	B7HTK2	0	0	0	0	0	0	0	0	0.0437307	0	0	0	0.0384725	0.00945158	0.0157833	0.00537464	0	0
	B7HZP8	0	0	0.00243764	0	0	0	0	0	0	0	0	0	0	0	0	0.00478328	0.0132767	0.0278926
	B7HY78	0.100865	0.084973	0.127439	0.0489572	0.0657063	0.0647518	0.0473108	0.0606476	0.0598434	0.104105	0.147642	0.0982877	0.0827323	0.12934	0.107994	0.0809043	0.115684	0.105572
	B7I093	0	0	0	0	0	0	0	0	0	0.00361337	0.00320279	0	0.00391573	0	0	0.00765841	0.00354285	0
ackA	B7HRT5	0.11414	0.128358	0.127048	0.0390811	0.0376574	0.0397611	0.0348617	0.0159604	0.0146989	0.0767118	0.0997263	0.0905311	0.0277103	0.0285919	0.0265256	0.0108392	0.0300859	0.0194481
hflX	B7HMK9	0.00241079	0	0.00752527	0.00546064	0	0.00240745	0.0026385	0	0	0.00928947	0.0144094	0.0164444	0.0025167	0.0194758	0.00963642	0.0123054	0.0296015	0.0242867
mprF	B7HKX4	0	0	0	0	0	0	0	0	0	0	0.00201664	0.00115073	0.00123277	0	0	0.00120553	0.00111538	0.0010815
	B7HLC6	0.122761	0.180102	0.14331	0.13225	0.124399	0.113621	0.088479	0.0792146	0.0663212	0.181715	0.191746	0.186732	0.118777	0.104818	0.125668	0.149776	0.113123	0.153562
folB	B7HPY4	0.0246858	0.009705	0.0342474	0.0372769	0.025015	0.041086	0.0360233	0.0197907	0.0113915	0.0158536	0.0351304	0.0320735	0.0257702	0.0369308	0.0411142	0.0252008	0.0233162	0.0226081
	B7HPF9	0.084653	0.0249605	0.0880815	0.119842	0.128673	0.10567	0.150555	0.1018	0.0439469	0.163096	0.135529	0.216537	0.209883	0.246956	0.253782	0.140431	0.159913	0.145365
	B7HWJ9	0	0	0	0	0	0	0	0	0	0.0103607	0.0183669	0.0183407	0.00280692	0.00965409	0.0161215	0.0137245	0.0177774	0.024625
	B7HZ66	0.0178145	0.00525272	0.02317	0.0100879	0.00902606	0.0133424	0.0146229	0.0107115	0.012331	0.0343223	0.0304223	0.0216993	0.0185971	0.0199884	0.0133516	0	0.00841311	0.0163152
yfiA	B7HX18	0.152315	0.160396	0.164144	0.14786	0.11576	0.168401	0.142887	0.11775	0.0677768	0.230573	0.171859	0.196131	0.255545	0.224613	0.222877	0.188813	0.133589	0.139495
	B7HZK1	0.0109956	0.0103748	0.0183054	0.0149436	0.0133707	0.0131764	0.0192547	0.0132228	0.0121776	0.0190661	0.0262884	0.0257152	0.00688718	0.0138178	0.00879033	0.00449	0.00623134	0.00604209
ansA1	B7HL04	0.0203763	0.0360484	0.0318022	0.0153847	0.0137653	0.0169567	0.0148673	0.0163357	0.0141042	0.0130859	0.00869926	0.00992785	0.00354524	0.00914509	0.00339367	0.0069338	0.00641528	0.00933065
malS	B7HMI1	0.0184293	0.010868	0.0191757	0.0020872	0	0.00184038	0	0	0	0.00177534	0.00157361	0	0	0	0	0	0	0
	B7HUN8	0	0	0	0	0	0	0	0	0	0	0.00401639	0	0.00245521	0.00211111	0	0	0	0
era	B7HPJ9	0.0300562	0.0275714	0.0347483	0.0151289	0.0135365	0.0200097	0.0109651	0.00803204	0	0.0418221	0.0484761	0.0423053	0.0313766	0.0239814	0.0367097	0.013637	0.031543	0.030585
aceB	B7HZQ4	0	0	0	0	0	0	0	0	0	0	0	0	0	0	0	0.00194251	0.0035945	0.010456
	B7HS11	0.00844486	0.00498004	0.0131803	0.00478208	0.00427874	0.00421658	0.00462127	0.0050777	0.00584543	0.0162702	0.0144215	0.0164582	0.00440792	0.0151606	0.00421948	0	0	0.00386705
	B7HV86	0.047927	0.0423947	0.0436345	0.0407096	0.0485662	0.0777736	0.052454	0.0576348	0.0331745	0.0115423	0.0102308	0.0175135	0.00625406	0.0107551	0.0119734	0.00611587	0.00565851	0
	B7HKL2	0.00669722	0	0.00348423	0	0	0.00334398	0.00366491	0	0	0	0.00571851	0.00652613	0.00349572	0	0.00334627	0	0.00316284	0.00613355
	B7HX53	0.00110217	0	0.0011468	0.00249651	0.00223373	0.00220128	0.0301569	0	0	0.00212349	0.0009411	0.00322203	0.0092047	0.0098933	0.0033042	0.00562582	0.00936919	0.00706583
	B7HPH7	0	0	0	0	0	0	0	0.0198698	0.034311	0	0	0	0	0	0	0	0	0
cotE	B7HLA4	0.0169117	0	0.0293277	0	0.00571241	0.0168883	0.0246788	0.0135581	0	0	0	0	0.0411941	0.0303606	0.0450663	0.293497	0.303496	0.289115
	B7HQ77	0	0	0	0	0	0	0	0	0	0	0	0	0	0	0	0.0148549	0.0122169	0.0133266
rsfS	B7HPM9	0.0593077	0.0399708	0.052894	0.057573	0.0858552	0.084608	0.0556369	0.0509434	0.0469167	0.0408089	0.0434062	0.0495365	0.0530684	0.060841	0.0423331	0.0345972	0.0240075	0.0155189
	B7HM21	0.0189897	0.0179176	0.0197588	0.0172054	0.0153944	0.00758538	0.00831338	0.00456724	0.0157734	0.0146346	0.0194576	0.0148037	0.0118944	0.0102274	0.00759059	0.0116316	0.00717449	0.0104349
	B7HKV7	0	0	0	0.0223103	0.00798481	0	0.004312	0.0521169	0.0927223	0	0	0	0	0	0	0	0	0
	B7HN40	0.385237	0.377203	0.347898	0.707955	1.06064	0.769408	1.09782	1.09261	1.13706	0.168049	0.217224	0.233737	0.599448	0.508909	0.631929	0.445217	0.350134	0.359471
	B7HP18	0.00617688	0	0.0128541	0.00699559	0.00625926	0.00616833	0.0135207	0.00742804	0	0.00595033	0.0158226	0.0120382	0.00644824	0.0055445	0.0123451	0	0.0058342	0
dapG1	B7HMJ1	0.0129238	0.00609707	0.0053789	0.00292736	0.00523848	0.00774357	0.00282892	0	0	0.0298796	0.0397266	0.0277061	0.00539664	0.00928057	0.00774889	0.0026387	0	0.00236722
murA1	B7HY45	0.0833688	0.0867594	0.109707	0.0222162	0.0298167	0.0318322	0.0161018	0.0117948	0.00678906	0.0377935	0.0669982	0.0549558	0.010239	0.0154069	0.0147019	0.0325414	0.0301079	0.0381761
	B7HQR3	0.0109438	0.00645372	0.00569353	0.0123944	0	0.00546434	0.0119776	0.00658028	0	0.00527122	0.0140168	0.00533213	0.0228492	0.0245586	0.0109362	0.0335165	0.0258417	0.0300683
	B7HMU9	0.00941107	0.0110996	0.00489611	0.0106584	0.00953658	0.00939804	0.00515	0	0	0.00906589	0.00401788	0.00917064	0.00491225	0.00422379	0.018809	0.00960743	0.0133334	0
	B7HPT0	0.00879669	0.00518752	0.00457648	0	0	0	0	0	0	0	0	0	0	0	0	0	0	0
pdhA	B7HMU2	0.221528	0.218818	0.244906	0.0940838	0.0785689	0.0995496	0.0757665	0.0566099	0.0383348	0.237411	0.252994	0.248249	0.118521	0.121795	0.118988	0.0876332	0.122927	0.12173
	B7HY35	0.00917112	0.00540832	0.00954255	0.00519335	0.00929343	0.00915842	0.0050187	0.00551439	0	0.00883475	0.0117463	0.00446841	0	0	0.00458236	0	0	0
	B7HQ08	0	0	0	0.00714398	0.00639204	0	0.0322174	0.128955	0.253243	0	0	0	0.0219501	0.00377475	0.0147082	0.0257581	0.0139019	0.0154054
serC	B7HXT1	0.034177	0.0369501	0.0503784	0.0612861	0.040405	0.0369739	0.0311711	0.0342498	0.0118285	0.0960269	0.0729562	0.0804844	0.101089	0.0843647	0.0996135	0.0901328	0.0807024	0.0991184
ilvC1	B7HMM6	0.0031072	0	0.00323304	0.00351904	0.00629727	0	0.00680138	0.00373657	0	0.00598647	0.00795936	0.00302782	0.0129748	0.00557818	0.00931508	0.00317203	0.00293482	0.00569136
	B7HXU2	0.00432169	0	0.00449672	0	0	0	0	0	0	0.00832636	0.00738026	0.00421128	0	0	0	0	0	0
	B7HRB1	0.0049416	0.00582825	0.0102835	0	0	0	0	0	0	0.0142811	0.0210973	0.00963072	0.00515869	0.00887139	0.00987631	0.0100894	0.00466745	0.00905139
	B7HU94	0.00642385	0.00378823	0.00334201	0	0	0	0.00351532	0	0	0	0	0	0	0	0	0	0	0
bacB	B7HR47	0.147441	0.153675	0.174819	0.213583	0.184153	0.198599	0.131346	0.127825	0.10443	0.0726682	0.108328	0.0868728	0.0501129	0.0554008	0.0445441	0.0245028	0.0259091	0.0251222
csaA	B7HNK6	0	0	0	0	0	0	0	0	0	0.0185203	0.0164159	0.00936713	0.050175	0.0431429	0.057636	0.0588796	0.0363177	0.0440183
	B7HP35	0	0	0	0	0	0	0.0296433	0.0651423	0.224975	0	0	0	0	0	0	0	0	0
	B7HSL4	0.00303831	0	0.00316136	0	0	0.0030341	0.0066506	0	0.00420617	0.0117075	0.0129715	0.00888207	0.00951536	0.00272725	0	0.0031017	0.00286975	0.00278259
	B7HSM7	0.114848	0.123141	0.124931	0.0709475	0.0793498	0.0677708	0.0514212	0.0565	0.0505887	0.130751	0.142639	0.132262	0.103544	0.131206	0.104334	0.0959271	0.103546	0.14343
	B7HMT8	0	0	0	0	0	0	0	0	0	0	0	0	0.0054477	0.00702629	0.0078222	0.023973	0.041896	0.0477924
	B7HYP2	0.0981163	0.140969	0.133645	0.147488	0.133772	0.197743	0.214768	0.169477	0.266721	0	0	0	0	0	0	0	0	0
sufD	B7HUX1	0.154337	0.141578	0.188626	0.144273	0.0992983	0.134552	0.126016	0.0942721	0.0780029	0.202954	0.225912	0.200525	0.132985	0.169322	0.141988	0.0950342	0.138833	0.13686
	B7HN23	0.0150078	0.029501	0.0312313	0.016997	0.0202773	0.0299741	0.0273757	0.0300795	0.0207765	0.0240956	0.0213577	0.024374	0.00522238	0.0269427	0.00999823	0.00510698	0.00945014	0.00458156
leuB	B7HKC5	0.0179029	0.00703838	0.0217326	0.043931	0.039307	0.0178781	0.0783758	0.0609995	0.0660917	0.0172463	0.0127389	0.0174455	0.0591831	0.0508885	0.056653	0.082244	0.0704571	0.0601191
	B7HVX9	0.0269677	0.0190838	0.0336719	0.0366505	0.0273274	0.0323165	0.029515	0.0259441	0.0373335	0.0311743	0.0414481	0.042046	0	0.0242068	0	0	0	0.0049396
trxB	B7HWY4	0.102609	0.0702692	0.117096	0.0974655	0.097269	0.109077	0.0941878	0.0676669	0.0549868	0.0924682	0.079135	0.0870857	0.0829288	0.0623929	0.0628453	0.0540643	0.0594002	0.0697217
	B7I0G9	0	0	0	0	0	0	0	0	0	0	0	0	0	0	0	0.00159596	0.00295321	0.00572704
nadC	B7HQI7	0.109491	0.084607	0.176781	0.0598639	0.0573888	0.0490144	0.0537185	0.0363226	0.0104536	0.152758	0.138624	0.150844	0.0709458	0.0711697	0.0943233	0.119485	0.135512	0.131396
	B7HZK2	0	0	0	0	0	0	0.00584161	0.00802322	0.0129308	0.0321355	0.0170904	0.0351074	0.0292526	0.0215596	0.0320024	0.0013622	0.00378101	0.0281073
	B7HNI0	0	0	0	0	0	0	0	0	0	0.0043918	0	0.00444254	0.0047593	0	0.00455583	0.00465414	0	0.00417531
hisS1	B7HQG1	0.0408326	0.048159	0.0599807	0.0462447	0.0413772	0.0407761	0.0289167	0.0288844	0.00997548	0.0462764	0.0492218	0.0491517	0.0250744	0.0258722	0.0312031	0.0220683	0.0226866	0.0285969
	B7HQ23	0	0	0	0	0	0	0	0	0	0	0	0	0.00718851	0.00618102	0.0137624	0	0.00650398	0.00630644
	B7HLA5	0.0720448	0.0509829	0.0749627	0.0734345	0.102208	0.0863342	0.14193	0.155948	0.219422	0.0347012	0.0492131	0.0351021	0.0451259	0.0646691	0.0647951	0.0147096	0.0408288	0.0395887
	B7HT46	0.00273457	0	0.00569065	0	0.00277104	0.00273079	0	0	0	0	0.0093398	0.00266471	0.00285471	0.00245461	0.00273267	0	0.00516573	0.00500884
mtnA	B7HT26	0	0.00352634	0.00622195	0.00338617	0.00605952	0.00298575	0.0032723	0.0035955	0	0.0403231	0.051059	0.0378755	0.0686671	0.0724622	0.0985973	0.0671499	0.0875444	0.090362
	B7HNX1	0.00372487	0	0.00775146	0	0	0	0	0	0	0	0	0	0	0	0	0	0	0
	B7HQ84	0	0	0.0082461	0	0	0	0	0	0	0.00763446	0.0112783	0.00514845	0	0.00474252	0.00527974	0	0.00499031	0.00483875
	B7HUN5	0.00448694	0	0.00933733	0	0	0	0	0	0	0	0	0	0	0	0	0	0	0
cotH	B7HNI9	0	0	0	0	0	0	0	0	0	0	0	0	0	0	0	0.00275119	0.00763635	0.00987257
bacE	B7HR46	0.0768949	0.0725534	0.0920105	0.117567	0.0915565	0.109424	0.0652226	0.0716645	0.037258	0.0759265	0.0672991	0.0711839	0.0321092	0.0207068	0.0230524	0.00588745	0.00363145	0.0105635
	B7I036	0	0	0	0	0	0	0.00963501	0.0105866	0.0487493	0	0	0	0	0	0	0	0	0
	B7HR23	0.0124328	0.0146636	0.00776181	0.019713	0.0176381	0.0186234	0.00952503	0.0164463	0.0137694	0.0143722	0.0106159	0.0121152	0.0038937	0.00446399	0.00372724	0.0152307	0.0140917	0.015941
	B7HX81	0.00108115	0.00127513	0	0.00122444	0.00109556	0.00107965	0	0	0	0.00208298	0.00461575	0.00210705	0.00112864	0.00194092	0	0	0	0
	B7I0D2	0	0	0	0	0	0	0	0	0	0	0	0	0	0.00511554	0	0.0116358	0.0107656	0.0208774
	B7HWA9	0.0297412	0.00584626	0.0309458	0.0112278	0.010046	0.0247501	0.0108502	0.00596091	0.00686218	0.0238753	0.0253949	0.0241512	0.0103493	0.0088988	0.0148602	0.0101206	0.0187275	0.00453968
phoP	B7HRM8	0.0290404	0.004893	0.0215832	0.00939701	0.00840792	0.00414289	0.0045405	0	0	0.0319718	0.0531354	0.0323411	0.0303162	0.0260673	0.0248744	0.00847038	0.0235108	0.0227968
	B7HNB3	0.00477893	0.00563639	0.0149174	0.00541234	0	0.00477231	0.00523033	0	0	0.0092073	0	0	0.00498887	0	0.00477559	0	0	0
	B7HVA6	0	0	0.00622624	0	0	0	0	0	0	0.00576442	0.0204377	0	0.00624677	0	0	0.0122175	0.0169558	0.0109605
	B7HSY2	0.0485986	0.0122825	0.0397311	0.0235886	0.0211058	0.0311987	0.0227953	0.0166979	0.0144169	0.0535042	0.0533527	0.0338265	0.043486	0.0436232	0.0450958	0.0354376	0.05246	0.0445084
	B7HX98	0.0230614	0.0271992	0.0279946	0.00435301	0	0.0115148	0.00420662	0	0	0.018513	0.0131275	0.0149815	0.00401243	0	0.00384089	0	0	0
recN	B7HNT7	0.00174462	0.00205765	0.00363056	0	0	0	0	0	0	0.00168063	0.00297934	0.00170005	0	0	0	0	0	0
lysP	B7HVT0	0	0	0	0	0	0	0	0	0	0.0146498	0.0129852	0.0190531	0.00907182	0.00780038	0.00651299	0.00443568	0.00410397	0.00795866
	B7HY97	0.0118487	0.00698732	0.00616428	0	0	0	0	0	0	0.00570706	0.0101172	0.00577299	0	0	0.00592021	0	0	0
accC	B7HNU7	0.080708	0.0734316	0.0839767	0.062678	0.0607541	0.0736881	0.0605702	0.0443684	0.0191538	0.0733052	0.0728515	0.067411	0.0698102	0.0558864	0.0529997	0.0635595	0.0435603	0.0570204
	B7HKF6	0.00253757	0	0.00264034	0	0.00257141	0.00253406	0.00277726	0	0	0.004889	0.00433348	0.00247274	0	0.00227778	0.0025358	0	0	0
	B7HWX3	0	0	0	0	0	0	0	0	0	0.00467601	0.00828938	0.00473004	0	0	0	0	0	0
	B7HUH4	0	0	0.00479479	0	0	0	0	0	0	0	0.00393473	0	0	0	0	0	0	0
	B7HR41	0	0	0	0.0106537	0	0.00939387	0	0.0113123	0	0.00906187	0.0321288	0.0274997	0.0491008	0.0591069	0.056402	0.0384127	0.0355401	0.0430758
dltD	B7HK92	0.00505248	0.00297951	0.0157713	0.00286108	0.00255993	0.00504549	0	0	0	0.00486717	0.00431413	0.00738511	0.00263722	0.00226761	0.00252448	0.00257895	0.00715828	0.00694087
	B7HVH4	0.0104364	0.008206	0.0180985	0.00787982	0.0105756	0.013896	0.00761483	0.00836694	0.004816	0.030161	0.020793	0.0271195	0.0181582	0.028104	0.0243347	0.0142056	0.0197149	0.0159301
proB	B7HVK7	0.00301761	0	0.0251185	0	0	0	0	0	0	0.0116277	0.0309194	0.00882154	0	0	0	0	0	0
	B7HSA0	0	0	0	0	0	0	0.00441914	0	0	0.00388965	0.00344768	0.00393459	0.00421513	0.00724874	0.00403493	0.00412199	0.00381374	0.00739583
cspA2	B7HR96	0.140991	0.221718	0.146701	0.177421	0.317492	0.187728	0.240036	0.263744	0.238559	0.120729	0.107011	0.152655	0.359786	0.435918	0.375714	0.559739	0.458694	0.530846
	B7HSW2	0.0188483	0.0333452	0.00980581	0.0320197	0.0381993	0.0282333	0.0412572	0.0453321	0.0521862	0.00907848	0.0160938	0.00918337	0.0196763	0.0338372	0.00941755	0	0	0.0172619
	B7I088	0.137857	0.198723	0.175315	0.416343	0.403564	0.550663	0.637041	0.40524	0.381691	0.0147556	0.013079	0	0.0319806	0	0.0153067	0.031274	0	0
spoVC	B7HPW2	0.00970068	0.00572061	0.0201871	0	0	0.00484363	0	0	0	0.0186898	0.0331322	0.0236321	0.00506342	0.0217689	0.00969391	0	0.00916251	0.00888423
kynU	B7HTI9	0.00472529	0	0.00491666	0	0	0	0	0	0	0.00455198	0.00605212	0.00230229	0.00246644	0	0	0	0.00223157	0
	B7HZU3	0.00759001	0.0134278	0.00789741	0.00429801	0.0115369	0.00757951	0.0166139	0.00912741	0.0105074	0.0109674	0.00972124	0.0147922	0.0198086	0.0204389	0.0189618	0.0232451	0.0143379	0.0104268
jag	B7HZH1	0	0.0117288	0	0	0	0	0	0	0	0.00478988	0.0127369	0.00484522	0.00519069	0	0.00993757	0.010152	0	0.00910753
tenA	B7HSD0	0.0985901	0.0960571	0.120424	0.0728202	0.0694991	0.0856119	0.0469142	0.0360835	0.0534075	0.11975	0.128104	0.121133	0.0671226	0.0769536	0.0899542	0.0437596	0.0485846	0.0588863
	B7HMB0	0	0	0.00577916	0	0	0	0	0	0	0	0.00948507	0	0	0	0	0	0	0
tyrS1	B7HSJ5	0.0512498	0.0316618	0.0406289	0.0165836	0.00247301	0.0194967	0.0106839	0.00586959	0	0.0282115	0.035425	0.0332937	0.0152861	0.0219062	0.0195101	0.0174397	0.0253558	0.00894027
polA	B7HRM6	0.0207666	0.0204106	0.0240085	0.0182927	0.0163672	0.0184337	0.0101014	0.00693695	0.00159716	0.0377872	0.0453148	0.0359753	0.0289053	0.0466015	0.0265166	0.0247333	0.0381394	0.0422641
bfmbC	B7HNS6	0.0632824	0.0639745	0.0705486	0.0332754	0.029773	0.0428822	0.0222621	0.021743	0.0125153	0.0457211	0.0598239	0.044047	0.0212344	0.0304306	0.0225851	0.0299942	0.0320205	0.0331179
ctaC	B7HMC8	0.00586184	0.0034568	0.00914887	0.0033194	0	0.00292687	0.00641554	0	0	0.0225874	0.0200208	0.0199923	0.0367162	0.018416	0.0322177	0.0478732	0.0609031	0.0697903
	B7HMN4	0	0	0	0	0	0	0	0.00397413	0	0	0.00282179	0	0	0	0	0	0.0031214	0.0030266
pepQ2	B7HRQ5	0.0704649	0.0797838	0.0967808	0.035114	0.0399866	0.0450351	0.0462725	0.0169476	0.011706	0.114039	0.105895	0.115357	0.0617909	0.0834912	0.0816823	0.0661804	0.0745424	0.0748598
	B7HU00	0.00667971	0	0	0	0	0.00667047	0	0	0	0.00643472	0	0	0	0	0	0	0	0
	B7HM37	0.00749933	0.00353796	0.00312122	0.00339733	0.00151987	0.00149779	0.00164154	0	0.00207638	0.00144485	0.00512272	0.00146155	0	0	0	0	0	0
	B7HQ36	0	0	0.00443046	0	0	0.00425212	0	0	0	0	0.00363576	0	0	0	0.00425504	0	0	0.00389964
	B7HW84	0	0	0	0	0	0	0	0	0	0	0.00558385	0	0	0.00587002	0.0130699	0	0.00617672	0.00598912
	B7HWX9	0.00213821	0.00252186	0.00222481	0	0	0	0	0.00257132	0	0	0	0	0	0	0	0	0	0
	B7HTP5	0	0	0	0.182925	0.163671	0.0403234	0.206236	0.307536	0.335401	0	0	0	0.0140511	0	0	0.0137406	0	0
argS1	B7HYC4	0.0899447	0.0909283	0.126057	0.0665249	0.0446421	0.0659904	0.0301349	0.026489	0.0101647	0.0831092	0.0783678	0.0643936	0.0268275	0.0280106	0.0220119	0.0318564	0.0346754	0.0420278
	B7HRG7	0.0493022	0.0533025	0.0598487	0.065143	0.0374698	0.0410283	0.0539591	0.0444664	0.0284387	0.12665	0.122784	0.108096	0.150115	0.147516	0.16012	0.125827	0.0970146	0.12417
cccA	B7HPJ1	0.00914042	0	0.0095106	0	0	0	0	0	0	0	0.023414	0.0089069	0.0381679	0.0410232	0.0456702	0.0466556	0.0604333	0.0334845
	B7HTG9	0	0	0	0	0	0	0	0.00712004	0	0	0	0	0.0123617	0.026573	0.0236665	0.0060443	0.00559229	0.0162673
	B7HL77	0.00153503	0	0.0015972	0	0	0	0	0	0	0.00295745	0.00524281	0.00149581	0	0.00275575	0.00153396	0.00156706	0.0043496	0.0042175
	B7HUF6	0	0	0	0	0	0	0	0	0	0	0	0	0.0115784	0.0149334	0.00738891	0.133983	0.144915	0.142207
fabH1	B7HMK7	0	0	0	0	0	0	0	0	0	0.0091719	0.00270991	0.00309262	0	0	0	0	0	0
	B7HV61	0	0.00122997	0.00108509	0.0200784	0.0147947	0.0135384	0.0593509	0.0827703	0.125603	0	0	0	0	0	0	0	0	0
	B7HLR5	0.00414411	0	0.00431195	0	0.00419938	0.00413837	0.00453555	0.00498352	0.00573701	0.0159685	0.0247695	0.00403824	0.00432617	0.0148794	0.0414122	0.00846115	0.0156568	0.0265673
amaA	B7HK97	0	0	0	0	0	0	0	0	0	0	0	0	0	0.00238491	0	0.0108494	0.0125476	0.0121665
argH1	B7HZY9	0	0	0	0	0	0	0	0	0	0	0	0	0	0	0	0	0.00371533	0.00360249
	B7HRZ0	0	0	0.00310325	0	0	0	0.00979253	0.0107597	0.00825771	0	0	0	0.0653832	0.0749595	0.062588	0.100475	0.101412	0.101064
metS	B7HPU9	0.0655498	0.0629276	0.0586876	0.0448881	0.0417081	0.0471914	0.0316997	0.0238315	0.0147725	0.0881101	0.0702886	0.0742734	0.041376	0.0465238	0.0365604	0.0357931	0.0489546	0.0446756
	B7HZM0	0.179236	0.200646	0.189656	0.698431	0.612604	0.658311	0.847835	0.807365	0.984109	0.0936471	0.103758	0.118411	0.11734	0.0845333	0.0971448	0.0682281	0.0659953	0.0751197
	B7HQZ8	0.0106096	0	0.0110393	0.00600794	0.00537557	0	0.0116118	0	0	0.00511025	0.00452958	0	0	0	0	0	0.00501052	0.00971668
cypA	B7HSF8	0.00729448	0.00286776	0.0075899	0	0	0	0	0	0	0.00468462	0.00622848	0.00236937	0.0482279	0.0458338	0.0510257	0.0471623	0.0528218	0.0645786
mtnD	B7HN17	0.0175813	0.00691192	0.0365866	0.0132744	0.0415701	0.0234092	0.0641398	0.0986647	0.0811303	0.00564548	0.015012	0.0057107	0.0183536	0.0315627	0.035138	0.0239308	0.0221412	0.0375703
	B7HYB9	0	0	0.00708703	0.0771396	0.0460134	0.027207	0.164	0.245724	0.361454	0.0153098	0.0271404	0.0309735	0.0616235	0.0998598	0.174698	0.00695329	0.0428887	0.0873309
	B7HYX7	0	0	0	0.00408704	0	0	0.00394959	0.00433969	0.00499584	0	0	0	0	0	0	0.00368402	0.00340852	0.003305
	B7HXT4	0	0	0	0	0.0124229	0.0122425	0.0134174	0	0	0	0	0	0.012798	0.0110043	0	0	0	0
	B7HZU9	0.0540251	0.0637185	0.0281066	0.0611858	0.0958048	0.134876	0.0739102	0.113694	0.112187	0	0.023065	0.0131612	0.0281993	0.0363706	0.0134969	0.0965166	0.0892988	0.0865867
	B7HY86	0	0	0	0	0	0	0.00693943	0.00762483	0.00877768	0	0	0	0.0198572	0.0227656	0.0190083	0.0258913	0.0239551	0.0174206
	B7HPW7	0.00410165	0.0024188	0.00426777	0.0046453	0.00207818	0.00409598	0.00224454	0.00246623	0	0.0118536	0.0157601	0.0119906	0.0192683	0.00736347	0.0143458	0.0104681	0.0232446	0.0131475
spoIIID	B7HY38	0	0	0	0	0	0	0	0	0	0	0	0	0.0150303	0.051695	0	0.0734909	0.040797	0.039558
xerD	B7HN69	0	0	0.00702065	0.00382085	0	0	0.00369236	0	0	0	0.00288067	0	0	0	0	0	0	0
	B7HYW2	0.0266157	0.0313912	0.0584643	0.0301434	0.0239739	0.0206724	0.0226564	0.0213379	0.00409402	0.0797673	0.080804	0.0950976	0.043221	0.0663634	0.0561495	0.06038	0.0670376	0.0893772
	B7HT52	0	0	0.0044595	0	0	0	0	0	0	0	0.00365959	0	0.0134226	0.00384714	0.0128488	0.013126	0.0121444	0.0039252
htrA	B7I048	0.0444833	0.0432062	0.0490075	0.0414888	0.042425	0.0418087	0.0429574	0.0629336	0.0652041	0.0126035	0.0134056	0.0101993	0.0109265	0.0117439	0.0104593	0.00267126	0.00494299	0.00479287
	B7HWU7	0.00566828	0	0.0117957	0.00641957	0.0114878	0.00566043	0.0186111	0.0136328	0	0.0382227	0.0435594	0.0165704	0.0710075	0.0864955	0.0793005	0.063652	0.058892	0.072677
	B7HKW0	0.0010554	0.00124476	0.00219629	0	0	0	0	0	0	0.00101669	0	0	0	0	0	0	0	0
	B7HM36	0	0	0	0	0	0	0	0	0	0	0	0	0.00512337	0.00734219	0.00326956	0.00334011	0.00463549	0.00299647
	B7HVJ9	0	0	0	0	0	0	0	0	0	0	0	0	0.0086038	0.0295918	0.00823597	0.0252411	0.0233535	0.0301923
	B7HZW7	0.0117119	0.0138133	0.0121863	0.0198964	0.0178022	0.0175436	0.0192273	0.0140842	0.0243206	0.0112824	0.0250009	0.0114127	0.0183397	0.0105129	0.0117038	0.00597815	0.00553109	0.0053631
	B7HV99	0.00799385	0	0	0	0	0	0	0	0	0	0.00682565	0.00778963	0	0	0	0	0.00755037	0
	B7HSB7	0	0	0.00358847	0	0	0	0	0	0	0.0099669	0.0117792	0.00672137	0.0036003	0.00309571	0.00689277	0	0.00325746	0.00631705
	B7HT50	0	0	0	0	0	0	0	0	0	0	0	0	0.0046995	0.00808172	0.0044986	0.013787	0.00850398	0.0082457
	B7HX77	0	0	0	0	0	0	0	0	0	0	0	0	0	0	0	0	0.00208447	0.00404232
	B7HT82	0	0	0	0	0	0	0	0	0.0128581	0	0	0	0.00969606	0.0166743	0	0.00948182	0.00877275	0.00850631
	B7HUY7	0	0	0	0	0	0	0	0	0	0	0	0	0.00603276	0	0.0115497	0.0294973	0.0327497	0.031755
	B7HPC8	0	0	0	0	0	0	0	0.00233607	0.00537855	0	0	0	0	0	0	0	0	0
	B7HQC7	0.0165415	0.0117056	0.0344228	0.0262275	0.0100572	0.00991113	0.0108623	0.0159136	0.0320595	0.0254956	0.0197738	0.0290139	0	0	0	0.00337732	0	0
	B7HPV8	0.0429111	0.0404883	0.0357192	0.0583185	0.0521801	0.0599924	0.075143	0.051603	0.0356431	0.0330698	0.0219841	0.0250889	0.0537555	0.0308144	0.0257287	0.0350452	0.0081061	0
pbuX	B7HL83	0.00492535	0.00580908	0.0102497	0.00278909	0.00499104	0.00245927	0	0	0	0.00237235	0.00841115	0.00719928	0	0	0	0	0	0
leuA	B7HKC4	0.0230754	0.0123708	0.02401	0.0570195	0.0382634	0.0418973	0.0573979	0.0655897	0.0348492	0.0242499	0.0179121	0.0163534	0.0525582	0.0414261	0.0398298	0.0214154	0.0178325	0.0230545
	B7HUW2	0	0.00748315	0.00660171	0.0143714	0.0128587	0.00633596	0.0138881	0.00762991	0.00878352	0.0122241	0.0108351	0.0123653	0.0198704	0.0113904	0.019021	0.00647713	0.00599275	0.0116215
	B7HST6	0	0	0	0	0	0	0	0	0	0	0	0	0	0	0	0.0225081	0.0104125	0
	B7HVC4	0	0	0.00416318	0	0	0	0	0	0	0	0.00341642	0	0	0	0	0	0	0
	B7HW03	0	0	0	0	0	0	0	0	0	0	0.00347703	0	0	0	0	0	0	0
	B7HVH6	0.00529903	0	0	0	0	0	0	0	0	0	0.00452465	0	0	0.00475653	0.0105907	0	0	0
	B7HYG8	0	0	0	0	0	0	0	0	0	0.00209177	0.00370817	0.00423187	0	0.0019491	0	0	0.00205094	0.00198865
	B7HVZ3	0.014424	0.00850602	0.0150082	0	0.00730819	0.00720202	0	0	0	0.0208425	0.00923709	0.0210833	0.00752884	0.00971048	0.00720697	0.0110437	0.0204357	0.0330251
rpsE	B7HQW1	0.314222	0.339718	0.28608	0.318801	0.278612	0.228803	0.186281	0.165318	0.172188	0.26486	0.217996	0.325332	0.287023	0.246796	0.294378	0.200487	0.173128	0.143888
	B7HNA7	0.054723	0.0537847	0.0616842	0.0464821	0.0462107	0.0409854	0.039928	0.0383876	0.0378786	0.0439299	0.0428321	0.0488812	0.0238029	0.032747	0.0227853	0.0279324	0.0215363	0.0167058
	B7HMV9	0.0254352	0.0149995	0	0.0144033	0.0386617	0.0381001	0.0139189	0.0152936	0.017606	0	0	0	0	0	0	0	0	0
	B7HMK3	0.00708489	0	0.00368591	0.00401197	0	0	0	0	0	0.00682504	0	0.00345195	0.00369807	0	0.00353997	0	0.00334592	0
	B7HXE6	0.0115387	0.013609	0.0150075	0.0261361	0.0321546	0.0345681	0.0189429	0.0381587	0.0359413	0.00277887	0.00246311	0.00281098	0	0	0	0	0	0
	B7HSM0	0	0	0	0	0	0	0	0	0	0	0	0	0	0	0	0.0151954	0.00702953	0.00681603
sufA	B7HUW9	0.0503534	0.0933241	0.0523927	0.0651742	0.0874713	0.093384	0.0708552	0.0432519	0.0697081	0.0762246	0.0552791	0.0771053	0.0976216	0.10331	0.107825	0.0734343	0.0407656	0.0527034
guaB	B7HPS4	0.236444	0.232389	0.298412	0.265303	0.224068	0.262351	0.244401	0.200089	0.15154	0.196137	0.209368	0.170669	0.109703	0.123805	0.113764	0.109514	0.126138	0.148372
	B7HVE6	0.0226995	0.00446206	0.0393648	0	0	0.00755604	0.0165624	0.0181983	0.0157124	0	0	0	0.0868881	0.0984821	0.0945154	0.181523	0.200109	0.190566
	B7HPM7	0.00373147	0	0	0	0	0	0.00408393	0	0	0	0	0	0.0155816	0.0167472	0.0149155	0.0761865	0.0881114	0.0854353
bacA	B7HR44	0.104528	0.11342	0.108761	0.151529	0.144054	0.12526	0.114401	0.110616	0.0520941	0.0483331	0.0499813	0.0407429	0.0261888	0.0262714	0.0292474	0.0170734	0.0157966	0.0114876
rsgA1	B7HLJ4	0.0103857	0.00816614	0.00360212	0	0	0	0	0.00416314	0	0.00666988	0.011824	0.0134939	0.010842	0.01243	0.006919	0	0.00980957	0.00634109
murB1	B7HM30	0	0	0	0	0	0	0	0	0	0	0	0	0	0	0	0.0106489	0.00656834	0.00318443
	B7HUD0	0	0	0	0	0	0	0	0.0156053	0	0	0	0	0.00451563	0.00776551	0.0129677	0.0132476	0.0163425	0.0158462
	B7HZC0	0.0102233	0.00120577	0.00425495	0.0092627	0.00828775	0.0173556	0.0123079	0.00245883	0.0014153	0.0275754	0.026188	0.0219168	0.0320174	0.0357891	0.0163459	0.0302663	0.032831	0.0262161
	B7HPF7	0	0	0.00282921	0	0	0	0	0	0	0.0261936	0.0185738	0.021197	0.00283854	0.017085	0.00815158	0.00277582	0.00513648	0.00996095
	B7HX69	0.155034	0.244536	0.155482	0.264432	0.208207	0.244354	0.363888	0.446999	0.677493	0.0935673	0.0510372	0.0746266	0.115046	0.0720959	0.074663	0.154455	0.119969	0.131722
nadB	B7HQI8	0.00406323	0	0.0105695	0	0	0	0	0	0	0.0019571	0.00346944	0.00197971	0	0	0	0	0	0
	B7I0C5	0	0	0	0	0	0	0	0	0	0	0	0	0	0	0	0.00884159	0.0122706	0.00396597
	B7HZA2	0	0	0	0	0.00266098	0	0	0	0	0.00252964	0.00224221	0.00255887	0	0.00471423	0	0.00268075	0.00248027	0.00721484
	B7HUH7	0	0	0.00193354	0	0	0	0	0	0	0.00179013	0.00317344	0	0	0	0	0	0	0.00170188
thyA	B7HQ32	0.00311271	0.00367121	0.0129551	0	0.00630845	0.00621681	0.00340673	0.00374321	0.00430917	0.00299855	0.00797349	0.00303319	0	0	0.00311054	0	0	0.00285073
	B7I0G1	0	0	0	0	0	0	0	0	0	0	0	0	0	0.0035818	0	0	0.0113068	0.00730895
	B7HXX6	0.00354629	0.00209129	0.00368991	0.00200816	0.00179679	0.00177069	0.00194063	0.00852921	0.0098188	0	0	0	0	0	0.00177191	0	0.00167477	0.00162391
mltG	B7HQE2	0.0228467	0.0067365	0.0267435	0.00323436	0.0115757	0.00570378	0.00312559	0.00343431	0	0.0137555	0.00731549	0.00556576	0.0029813	0.00256347	0.00285385	0.00291543	0.00539481	0.00261548
ecsA	B7HZI1	0.00823652	0	0.0128552	0	0	0	0	0	0	0.0119016	0.0140657	0	0.00429918	0.00739329	0.0164616	0.00840838	0.0155592	0.0264016
	B7HYG7	0	0	0.00512612	0.00278979	0.00249615	0	0.0107839	0.00296225	0.00682026	0.0142377	0.0210332	0.0120018	0.0154291	0.0243222	0.0196926	0.0427498	0.0465328	0.0428635
secDF	B7HQH0	0.00416653	0	0.00722546	0.00471878	0.00985157	0.0124823	0.0106402	0.00501048	0.00192268	0.0374613	0.0332047	0.0378942	0.0217479	0.0224398	0.00971512	0.0297743	0.0288595	0.0356147
	B7HRD1	0	0	0.00363156	0	0	0	0	0	0	0.0100866	0.0119206	0.00340104	0.00364354	0.00939866	0.00697554	0.0106891	0.00988973	0.0191787
	B7HQ46	0	0.00979371	0	0.00940442	0.00841455	0	0.00908816	0.0199716	0.0114956	0.00799924	0.0141806	0.00809166	0.0086686	0.00745368	0	0.00847706	0	0.00760492
	B7HZJ4	0	0	0	0	0	0	0	0	0	0	0	0	0	0	0	0.0063556	0	0.0114034
pyrH1	B7HLF8	0.0798458	0.0680132	0.0692329	0.0301429	0.0224752	0.0310082	0.0242744	0.0213375	0.0184228	0.0769173	0.0833279	0.0994187	0.0463075	0.0597261	0.0531934	0.0407559	0.0251387	0.0487504
	B7HU37	0	0	0	0	0	0	0.0026881	0.0029536	0.0102005	0	0	0	0	0	0	0	0	0
infA1	B7HQW7	0.238327	0.24802	0.175044	0.269916	0.284124	0.265997	0.245495	0.269743	0.252303	0.135051	0.131676	0.109289	0.160987	0.138424	0.154104	0.200365	0.172139	0.166911
	B7HPH3	0.0202173	0.0136256	0.0240413	0.022897	0.0190236	0.0317261	0.0648005	0.0868302	0.135944	0.00834678	0.0061653	0.00281441	0	0.00129625	0.00288618	0	0	0.00132255
	B7HP28	0	0	0.00443208	0	0.00431638	0	0	0	0	0.00820668	0.0181854	0.016603	0.0177868	0.0191174	0.0170264	0	0.00402326	0.00780213
	B7HNL8	0	0	0	0	0	0	0	0	0	0	0	0	0	0	0	0.00634216	0.0117358	0
	B7HSJ0	0.0392346	0.0231372	0.0340197	0.0148117	0.019879	0.0261202	0.0143135	0	0.00905259	0.0314964	0.0390845	0.0318603	0.0136528	0.0117393	0.00653455	0	0.00617633	0.00598875
	B7HPK3	0	0	0	0	0	0	0	0	0	0	0.0012239	0.00139675	0.00149634	0.00128662	0	0.00292655	0.00541539	0.00656365
	B7HLA7	0.0731733	0.073357	0.0875573	0.0662975	0.0519044	0.0474968	0.0520552	0.0483972	0.0253249	0.0986852	0.0937199	0.092695	0.0725685	0.0755342	0.0877466	0.056025	0.0449239	0.0636639
	B7I0J7	0	0	0	0	0	0	0	0	0	0	0	0	0.00292497	0	0	0	0.00264644	0.00128303
	B7HUG6	0	0	0	0	0	0	0.00429543	0	0	0	0	0	0	0.00352291	0	0	0	0.00359439
	B7HV45	0.0263987	0.0103784	0	0	0	0	0.0192615	0.0423278	0.0365457	0	0	0	0	0	0	0	0	0
aacC7	B7HUN6	0.00384504	0	0	0	0	0.00383972	0	0	0	0.0148161	0.0131326	0.0187341	0.00401396	0	0	0	0	0
cpdB	B7HNP0	0.0118673	0.0186621	0.0123479	0.0238938	0.0187065	0.0144844	0.0288628	0.0317135	0.0511119	0.00635114	0.00450358	0.00513961	0.00275303	0.00355079	0.00395301	0.0013461	0.00124544	0.00483045
	B7HZB1	0.0125742	0.0296607	0.0261669	0.0189878	0.00849461	0.0041856	0.00917462	0.00504039	0	0.0161507	0.0250522	0.024506	0.0175022	0.0112869	0.0125654	0.00855771	0.00791775	0.00767728
srtB	B7HRI5	0	0	0	0	0	0	0	0.0214653	0.0679547	0	0	0	0	0	0	0	0	0
thrS1	B7HRL5	0.0558149	0.0621722	0.0677546	0.0368741	0.0314218	0.0387067	0.0271498	0.0186446	0.0128781	0.0492871	0.0383914	0.0377701	0.0145667	0.0208753	0.00929599	0.0110793	0.021966	0.0255586
	B7HL49	0	0	0.00558148	0	0	0	0	0	0	0.00258374	0.00916063	0.00522718	0	0	0	0	0	0.00491275
dapA	B7HLD2	0.0734832	0.0563341	0.0841052	0.0374503	0.0148926	0.0293526	0.0120636	0.0176735	0	0.0283152	0.0658818	0.0393832	0.0230134	0.019788	0.0330444	0.0637639	0.0694065	0.0740284
speA	B7HME7	0.0128202	0.0151205	0.00889295	0.00967963	0.0043304	0.00640123	0.00233853	0	0	0.006175	0.0036489	0.00208211	0.00223057	0.00191795	0	0	0.00201816	0.00195687
nadK	B7I0B3	0	0	0.00802273	0	0	0.00384989	0	0	0	0.0148553	0.0164592	0.0150269	0.00402459	0.00692107	0.00770507	0.00393566	0.010924	0.00706151
	B7HP08	0	0	0.00357881	0	0	0	0	0	0	0	0.0088106	0	0.00359061	0	0	0	0	0
	B7HVW6	0.00989765	0.0116735	0	0.022419	0.0501483	0.0593037	0.0541628	0.0476099	0.0548083	0	0	0	0.0103325	0.0266531	0.00989075	0.0202083	0	0.00906462
	B7HV38	0.00414031	0	0.00430799	0	0	0	0	0	0	0	0	0	0	0	0	0	0	0
	B7HQJ1	0.0284295	0.0111768	0.0246507	0.0160988	0.0192058	0.00946338	0.00518581	0.011396	0.013119	0.0228223	0.0323665	0.0138516	0.0197856	0.00850631	0.0189398	0.0145113	0.0223769	0.0130184
plC	B7HW98	0.00708725	0.0167178	0.00368714	0.120399	0.0610451	0.0460034	0.209431	0.255684	0.426797	0	0	0	0	0	0	0	0	0
cshA	B7HRY6	0.0940235	0.0877908	0.0591065	0.0865196	0.0813828	0.0802005	0.0385892	0.0212003	0.0135587	0.190585	0.150531	0.164155	0.0920194	0.103739	0.0841706	0.0579911	0.0684556	0.0520248
	B7HWC0	0	0	0	0	0	0	0	0	0	0	0	0	0	0	0	0	0.00323016	0
ychF	B7HZG2	0.073314	0.0764913	0.0792172	0.0510962	0.0400033	0.042238	0.0370334	0.0271274	0.031229	0.0950722	0.0650078	0.082432	0.0441547	0.0455596	0.0450849	0.0374219	0.03995	0.0439016
	B7HVM6	0	0	0	0	0	0	0	0	0	0	0	0	0	0.0110447	0	0.0251223	0.058109	0.0225376
hpt2	B7HTS8	0.00576916	0.00680429	0.0180084	0	0	0	0	0	0	0.0111151	0.0295564	0.0224871	0	0	0	0	0	0
	B7HLC4	0	0	0.0063406	0.00345075	0	0.00304268	0	0	0	0.00293515	0.00260163	0.00593812	0	0.00546993	0.00304477	0.00311047	0.00575573	0.00558092
	B7HVG5	0.0228631	0.0154088	0.0339844	0.0147963	0.00661944	0.00652328	0.00357467	0.00785547	0.0045216	0.0251709	0.0250997	0.0127309	0.00340965	0.00879533	0.00326388	0.00333431	0	0.00598253
	B7HZY6	0	0	0	0	0	0	0	0	0	0	0	0	0	0	0	0.00226437	0.00167603	0.000812563
	B7HKF2	0	0	0	0	0	0	0	0	0	0.00948918	0.0168219	0	0	0	0.0049218	0	0	0
	B7HU77	0.00465302	0.0109758	0.00968294	0	0	0	0	0	0	0.00448236	0.0158922	0.00453415	0	0.00417666	0	0.00950021	0.0131846	0.00852281
	B7HRZ6	0.00645442	0	0.00671582	0	0	0.00644549	0	0	0	0	0	0.00628953	0	0	0	0	0	0
	B7HYA1	0.00830957	0	0.0086461	0	0	0	0	0	0	0.0186779	0.00946031	0.0188937	0.00578308	0.00497257	0.00553585	0.0056553	0.00523238	0.0177571
hmp	B7HKH2	0	0	0.00264931	0	0	0	0	0	0	0.00245281	0.0065223	0.00744343	0	0.00457104	0.00763325	0	0.00721481	0.00699568
	B7HWA5	0.0161575	0.00762261	0.0168118	0.00365981	0.00327459	0.00322702	0.00353673	0.00388605	0	0.00933891	0.011037	0	0	0.00290066	0	0	0	0
	B7HMZ6	0.00398013	0	0.00828264	0	0	0.00397462	0	0	0	0.00383415	0.00679696	0	0	0.00357265	0	0.00406317	0.00751863	0.00364514
spoVR	B7HWJ4	0	0	0.00424755	0	0	0	0.00893564	0.0147273	0.0113027	0	0	0	0.0277001	0.0348108	0.0122381	0.0916828	0.109889	0.115898
	B7HPL0	0.00828565	0	0.00431061	0	0	0	0	0	0	0	0	0.00403699	0	0	0	0	0	0
secA1	B7HX16	0.092995	0.105407	0.0841949	0.0807004	0.0746539	0.0820118	0.0515504	0.0595467	0.0250792	0.140775	0.13406	0.137694	0.118514	0.131174	0.0965507	0.0900036	0.0844136	0.108396
	B7HT95	0.177567	0.16015	0.17389	0.195188	0.174643	0.177321	0.148613	0.0879258	0.0795299	0.110682	0.115943	0.137407	0.1363	0.117197	0.140911	0.0693099	0.0591939	0.0669621
menD	B7HTW7	0	0.00207887	0.001834	0	0.00178612	0.00176018	0.00192911	0	0	0.00169797	0.00301007	0	0	0.00158216	0	0	0	0
	B7HTN6	0	0	0.00395878	0	0	0	0	0	0	0	0	0	0.00794368	0.00341518	0.00380204	0.0660293	0.0790596	0.0696895
	B7HNN7	0	0	0	0.0176029	0.0157501	0.00776064	0.0765491	0.0186911	0.0537927	0	0	0	0	0	0	0	0	0
	B7HN13	0.00265955	0	0.00553452	0	0	0.00265587	0	0	0	0.002562	0.00227089	0.00518321	0	0	0	0.00543008	0.00502401	0.00487142
	B7HS64	0	0	0	0	0	0	0	0	0	0	0	0	0	0	0	0.104403	0.0869363	0.0655635
acuB	B7HSK1	0.00480432	0	0.0049989	0.0054411	0.00973679	0.00959534	0	0.0115549	0	0.00925622	0.00820446	0.00468158	0.0100308	0.0215623	0.0192039	0.00490456	0.0226889	0.0175999
hisD	B7HKD0	0	0	0.00503885	0	0	0	0.00530015	0	0	0.00933021	0.0103375	0.00943801	0.00505547	0.0108673	0.00967869	0.00741565	0.0137222	0.015523
	B7HL63	0.00574427	0	0.00119538	0.00520451	0.00465671	0.00458906	0.00251474	0.00138156	0	0.00553359	0.00294289	0.00335851	0.00359798	0.00309371	0.00344416	0.00820977	0.0130214	0.00946946
	B7HUA0	0.00622234	0.00733879	0	0	0	0	0	0.00748271	0.0172281	0	0	0	0	0	0	0	0	0
	B7HVY8	0	0	0	0	0	0	0	0	0	0	0	0	0	0	0	0.00513291	0.00474906	0.0138145
gpmI	B7HW53	0.0734033	0.0649303	0.103956	0.0738955	0.0599191	0.0855187	0.0647157	0.0588477	0.050809	0.0766037	0.0731224	0.0735149	0.057471	0.0603977	0.0407512	0.047875	0.0635535	0.0690928
tkt1	B7HYW7	0	0	0.00165391	0	0	0	0	0	0	0.00153124	0.00678623	0.00309786	0.00165937	0.0014268	0	0.0032454	0.0030027	0.00291151
	B7HYC0	0	0	0	0.0284896	0.0169939	0	0.00917717	0.050418	0.058041	0	0	0	0.00875351	0	0	0	0	0
rsmI	B7HPU7	0.00340526	0.00401624	0	0	0	0	0	0	0	0.00328036	0.00290762	0	0	0	0	0	0	0
	B7HS71	0.0162142	0.00956171	0.0189797	0.0229541	0.0143766	0.0121438	0.0110911	0.0121865	0.00561164	0.0468585	0.0553788	0.0612249	0.0359688	0.0600362	0.0445579	0.033105	0.0421153	0.0501172
	B7HZZ0	0	0	0	0.00316415	0	0	0.012231	0.0167987	0.0193386	0	0	0	0	0	0	0	0	0
trpE	B7I0E7	0.170826	0.171255	0.213294	0.302294	0.259657	0.281473	0.245388	0.20286	0.162586	0.113136	0.114867	0.093635	0.12929	0.136087	0.117361	0.102455	0.121012	0.113425
speD1	B7HRM0	0.0871319	0.112108	0.0412094	0.0627968	0.112374	0.110742	0.0953621	0.0952554	0.0986919	0	0	0.00771872	0.00826907	0.00711014	0.00791556	0.0242591	0.0224449	0.0217632
	B7HWS0	0	0.00990682	0.0174798	0	0	0	0	0	0	0	0	0	0	0	0	0	0	0
	B7HKF3	0	0	0	0.0105378	0.00942864	0.00696875	0.0127293	0.00839192	0.00322025	0	0	0.00226671	0.00485665	0	0.00232451	0.00237467	0	0.00213036
	B7HXE5	0	0	0.00486278	0.00529295	0.00473584	0.00933408	0.0102299	0	0	0	0	0	0	0	0	0	0	0
	B7HNH8	0.0354602	0.0266144	0.0335421	0.0620659	0.0359332	0.0740415	0.0564505	0.0465195	0.0490903	0.0186325	0.0165154	0.0125652	0.00336528	0.00578725	0.00322141	0.00987275	0.00913445	0.0118094
	B7HTR9	0.0137121	0.0646893	0.0142674	0.0465885	0.0277899	0.0410792	0.0450218	0	0.0189827	0	0	0	0	0	0	0	0	0
	B7HRP7	0.0164567	0.0155276	0.0239725	0.00745518	0.0100057	0.00986036	0.00720446	0.00395802	0.00455646	0.0475594	0.0449657	0.0384871	0.0343594	0.0177263	0.0263124	0.0201601	0.0310875	0.0301433
	B7HZL5	0.00430359	0	0.00895576	0.004874	0.00872197	0	0.0141303	0	0	0.016583	0.00734935	0.00838728	0.00449265	0.003863	0.00860117	0.00878676	0.00406483	0.00788276
	B7HMQ5	0	0.00311933	0.00275191	0.00599069	0.0080402	0.00528226	0.00578922	0.012722	0	0.0611469	0.0609738	0.0721623	0.104917	0.104457	0.140076	0.0863992	0.0924284	0.09931
	B7I0J0	0.0595695	0.0468385	0.0840202	0.143926	0.112679	0.118974	0.249195	0.219683	0.311541	0.223163	0.189893	0.25799	0.28744	0.346967	0.431247	0.117571	0.222558	0.381891
	B7HNK7	0	0	0	0	0	0	0	0	0	0	0.00959362	0.00547426	0.00586457	0.0100853	0.00561386	0.00573499	0	0
	B7HLK8	0.0159444	0.0125368	0.0165901	0.0100321	0.00538568	0.0141532	0.00387788	0.00426089	0	0.0238927	0.0272286	0.0241687	0.0147954	0.0254436	0.019474	0.0126599	0.0200798	0.0275824
	B7HSM2	0.00543213	0.00640679	0	0.00615213	0	0	0.00594524	0	0	0	0.0139149	0	0.00567077	0	0	0.00554547	0	0
	B7HK78	0.0224918	0.00884245	0.0156018	0.00849097	0.00759724	0.00748688	0.00820542	0.00901586	0.0207581	0.00722227	0.0128033	0.0146114	0.00782662	0.0134594	0.00749202	0.00765368	0.00708132	0.00686625
purD	B7HS37	0.0893907	0.0995724	0.105929	0.0534316	0.0503238	0.0471131	0.0434819	0.0358324	0.0309376	0.0885041	0.0805678	0.0774284	0.0285138	0.0401195	0.0397015	0.0101395	0.0117266	0.0136445
	B7HMD5	0.0120853	0.0142537	0	0	0	0	0	0	0	0	0.00515961	0.0117766	0	0	0	0	0	0
	B7HN19	0.00863024	0	0.0179595	0.156386	0.192398	0.155129	0.179463	0.166053	0.179213	0.0249411	0.0221071	0.033639	0.162169	0.1162	0.146612	0.114534	0.0652116	0.0632311
	B7HKL0	0.00551954	0.00650988	0.00574308	0	0	0	0	0	0	0	0.00471293	0	0	0	0.00275784	0	0	0
	B7HNC2	0.00744672	0.00439142	0.00387415	0	0	0	0	0.0179102	0.0360817	0	0.00635847	0.00362824	0	0	0	0	0	0
	B7HX33	0	0	0.00233688	0.0012718	0	0	0.00122903	0.00135042	0	0	0	0	0	0	0.00112218	0	0	0
	B7HU15	0	0	0	0	0	0	0	0	0	0	0	0	0	0	0	0.00390621	0.00722819	0.010513
	B7HVP9	0.00973749	0.00574232	0.0101319	0.00551407	0.00986736	0.00972401	0	0	0	0	0.00415724	0	0	0	0	0	0	0.00445897
	B7HS85	0	0	0	0	0	0	0	0	0	0.00336738	0	0.00340628	0.00364915	0	0.00698629	0.00713704	0	0.00320138
	B7HP16	0.00514848	0.00607225	0.010714	0	0	0	0	0	0	0.0099193	0.00879219	0.0150509	0.00537466	0.0138642	0	0.0052559	0.00486285	0.00943033
azoR1	B7HQ35	0.0050105	0	0	0.00567461	0	0	0.00548378	0.0120508	0.0138728	0	0	0	0	0	0	0	0	0
	B7HNR1	0.118781	0.129842	0.135649	0.082027	0.0792646	0.0896855	0.060244	0.0661943	0.0441173	0.147914	0.15337	0.143977	0.099804	0.101419	0.0984323	0.0680233	0.101246	0.0981705
	B7HP84	0	0	0	0	0	0	0	0	0	0	0	0	0.0153544	0.0396074	0.014698	0.0450454	0.0694614	0.0538814
nheA	B7HMQ2	0.0734545	0.0773518	0.0709701	0.644726	0.420021	0.372004	0.855609	1.89285	3.05429	0.0379073	0.01344	0.0204508	0.00821587	0.0211932	0.00524309	0.00535622	0	0
	B7HUJ7	0.0524652	0.0265194	0.0467914	0.0169769	0.0227849	0.0374232	0.00820298	0.00901318	0.0103759	0.0649811	0.0319986	0.0730354	0.0234729	0.0470939	0.0224694	0.0229542	0.0141584	0
	B7HTS9	0.0419392	0.0247321	0.0363648	0.0118745	0.0141662	0.0069802	0.00765011	0.00420285	0	0.0505013	0.0477471	0.0408678	0.0255393	0.0313713	0.034925	0.0142714	0.0198063	0.0256063
	B7HYX3	0.00647109	0	0.00336658	0.0036644	0.0032787	0.00323107	0.00354116	0	0	0.0155844	0.019339	0.00945866	0.0101331	0.0116172	0.0129332	0.00660611	0.0122242	0.0118529
	B7HML0	0	0	0.00390703	0.00212632	0	0.00187488	0	0	0.00259913	0.0271292	0.0464901	0.0237836	0.0195996	0.0269642	0.0206378	0.0249164	0.0443329	0.0481449
prsA1	B7HQC0	0.00716034	0	0.0111755	0.0040547	0	0.00357521	0	0	0	0	0	0	0	0	0	0	0	0
	B7HN95	0	0	0	0	0	0	0	0	0	0	0	0.00877935	0	0.00808715	0	0	0.0085097	0.00825124
	B7HVK0	0.00409604	0	0.0127858	0	0	0.00409037	0.0134488	0.00985142	0.00567046	0	0	0	0.0598637	0.0661805	0.0818636	0.146352	0.143146	0.150052
	B7HLU7	0	0	0.0020526	0	0	0	0	0	0	0	0.00336883	0	0	0	0	0	0	0
	B7HPI3	0	0	0	0	0	0	0	0	0	0	0	0	0.0627847	0.0755794	0.0120201	0.208751	0.181779	0.121178
prsA2	B7HPW1	0.138352	0.151521	0.164521	0.111921	0.106817	0.134871	0.0937366	0.0792268	0.0592837	0.152318	0.180014	0.154078	0.0962869	0.106447	0.0954624	0.0706195	0.0777839	0.0754214
	B7HX75	0.0112636	0.00442819	0.0351594	0.0892957	0.0570692	0.0599895	0.102729	0.252842	0.369037	0	0	0	0.0274364	0.0202209	0.0300153	0.122652	0.11348	0.103156
	B7HZX3	0.0318526	0.020871	0.0220951	0.0160331	0.0143455	0.00706856	0.0271143	0.0510727	0.0685938	0.0170469	0.0211538	0.0103463	0.00369466	0.0127074	0.00707342	0	0.00334283	0.00648261
	B7HQD0	0.0194479	0.0229373	0.0375803	0.0188791	0.016892	0.019421	0.0152035	0.0233872	0.00769236	0.064233	0.0687956	0.0568532	0.0319036	0.0274322	0.0222107	0.0397074	0.0288655	0.0305333
	B7I090	0	0.00831902	0	0	0	0	0	0	0	0	0.00602268	0	0	0	0	0.0144012	0	0.0064598
murF_1	B7HRY5	0.00909421	0.0160889	0.0236563	0.00772469	0.00691162	0.011352	0.00746491	0.00820221	0	0.0240918	0.0310608	0.0288011	0.0189875	0.0183671	0.0181757	0.0255309	0.0343587	0.0395618
	B7HPY6	0.0151937	0.0179198	0.015809	0.120453	0.123171	0.166899	0.199546	0.127899	0.0841352	0	0	0	0	0	0	0	0	0
cotJC	B7HXF1	0	0	0.00551496	0	0	0	0	0	0	0	0	0	0.0165994	0.0237883	0.0052966	0.0324653	0.0450562	0.0388336
	B7HZ78	0	0	0	0	0	0	0	0.00382924	0.0176328	0	0	0	0	0	0	0	0	0
	B7HYG2	0	0	0.00398357	0.00867193	0.00387958	0.00382322	0	0	0	0.0036881	0.00326903	0	0.00799342	0	0.00382585	0.0039084	0	0
fbp2	B7HY93	0.111612	0.0997261	0.133729	0.0766097	0.0685461	0.0743053	0.0703317	0.04474	0.0327757	0.1401	0.155948	0.141719	0.112985	0.115366	0.0878757	0.117394	0.11181	0.145584
mreC	B7HQK9	0.0366224	0.0302353	0.0457267	0.0290335	0.0222665	0.0292573	0.0200408	0.00440404	0.00506992	0.0246954	0.0250164	0.0285494	0.0191156	0.0164365	0.0182984	0.0112159	0.0172953	0.013416
	B7HSN4	0.0104975	0.00825402	0.00728177	0.0158519	0.0141834	0.00698866	0.0153188	0.00841589	0.00968835	0.0269666	0.0298781	0.0238684	0.0219174	0.0251275	0.0139869	0.0107165	0.00991513	0.0128187
	B7HSN2	0.0202105	0.0238368	0.0420581	0.0343339	0.02048	0.0201825	0.0331793	0.0243042	0.027979	0.0292039	0.0431425	0.0295413	0.0316476	0.0362828	0.0201964	0.0412644	0.0381785	0.0462738
	B7HLT9	0.00238604	0.00562831	0	0.0108092	0.00483573	0.00953095	0.0443941	0.0918191	0.175069	0	0	0	0.00249086	0	0.00238438	0	0.00225367	0
	B7HWU6	0.00602109	0	0.00626495	0.0136383	0.0244056	0.024051	0.0263593	0.0289628	0.0166709	0.023201	0.0359883	0.0352036	0.031428	0.0378327	0.0300845	0.0184402	0.0170612	0.0110287
	B7HKT5	0.0315296	0.0371868	0.0328066	0.0357087	0.0319501	0.047229	0.0345078	0.0379161	0.0218244	0	0	0	0	0	0	0.0160937	0	0
	B7HLP1	0.0069325	0.00408818	0.00721327	0	0	0.00346145	0	0	0	0.0166956	0.0266373	0.0270216	0.00723706	0.00933415	0.00346383	0.00707715	0.00327395	0.0126981
	B7HNK0	0	0	0	0	0	0	0	0	0	0	0.00871057	0.00994075	0	0.00457849	0.00509713	0	0	0
	B7HNL1	0.0285785	0.0202237	0.0356831	0.0129466	0.0231677	0.0171234	0.00625559	0.0137469	0.0079127	0.0440486	0.0634456	0.0389878	0.0537012	0.0359138	0.0571172	0.0175049	0.0377903	0.0261732
	B7HYG9	0.0080108	0.00944814	0.0125029	0.0226815	0.0121765	0.0119996	0	0.00963343	0.00554499	0.023151	0.0478809	0.0312246	0.0292696	0.0287627	0.0360235	0.0122669	0.018916	0.0146732
	B7HMP2	0	0	0	0	0	0	0	0	0	0	0	0	0	0.0050532	0.00562561	0	0.00531722	0
	B7HLQ3	0.00684575	0	0.014246	0.00516874	0.00693705	0.00683628	0.00998984	0.00548826	0.00315904	0.00879289	0.0155876	0.00222362	0.0500255	0.0696422	0.0684098	0.0698859	0.0991448	0.0877742
	B7HNT9	0.00736434	0.00434284	0.0038313	0.00417022	0.00373128	0	0.00402997	0	0	0	0.00628813	0	0	0	0.0036796	0	0	0
	B7I054	0	0	0.00733089	0	0	0	0	0	0	0.0135743	0.00601593	0	0	0	0	0	0.00665468	0.00645256
	B7HXU0	0.00348028	0.00410472	0.0162955	0.0354741	0.0370303	0.0486564	0.0590397	0.0502227	0.0674522	0.00335263	0.00297168	0.00339136	0.00363317	0.0109339	0.00347785	0.00532934	0.008218	0.00637472
cspB1	B7HLP6	0.367699	0.433673	0.249516	0.325906	0.550804	0.351225	0.437424	0.557529	0.553298	0.0462016	0.0409519	0.0623139	0.183582	0.157852	0.159757	0.163205	0.1057	0.146414
	B7HZ07	0	0	0.00568346	0	0	0	0	0	0	0	0	0	0.0114044	0.0245151	0.0218337	0.0390334	0.0412736	0.0450226
	B7HKG0	0.004331	0	0.045064	0	0	0.004325	0.0142203	0.00520826	0	0	0	0	0.0180851	0.0311008	0.0173119	0.114955	0.11045	0.150726
	B7HYC9	0.0177152	0.00835748	0.0258057	0	0.00718057	0.00707626	0	0	0	0.00682617	0.00907579	0.00345252	0	0	0	0	0	0
	B7HZI0	0.0642713	0.0505354	0.0594438	0.0566145	0.057892	0.0713137	0.078158	0.0515265	0.0593172	0.0481553	0.0487812	0.0487117	0.0820048	0.0705117	0.0713627	0.0583221	0.0539606	0.0392413
	B7HKI1	0.0101581	0	0	0.023009	0.0154404	0.0253601	0.0333528	0.0183235	0.0351566	0.0195711	0.0173473	0.0148479	0.0371153	0.0455907	0.0304531	0.0259251	0.0287837	0.0465158
	B7HLC3	0	0	0	0	0.00689434	0.00339709	0	0	0	0	0	0	0	0	0	0.00347278	0.00321307	0.00311549
hup1	B7HL20	0.464148	0.533391	0.421029	0.431317	0.530638	0.463505	0.33866	0.329173	0.230661	0.332477	0.375994	0.359512	0.39757	0.34185	0.309216	0.303738	0.370952	0.294288
rpsA	B7HL08	0.201583	0.195985	0.235257	0.20979	0.187709	0.182262	0.19081	0.176897	0.113135	0.317526	0.323314	0.257486	0.275845	0.254301	0.302163	0.203008	0.216129	0.222039
asnO1	B7HZS8	0	0	0	0	0	0	0	0	0	0	0	0	0	0	0	0.0528126	0.0626059	0.0666269
	B7HVT1	0	0	0	0.0112561	0.0201427	0.0198501	0.0326327	0.0239039	0.0275181	0.00957426	0.00848636	0	0.0103754	0.00892128	0.0198637	0	0.00938741	0.0091023
	B7HQI4	0.00331753	0	0	0	0	0.00165647	0.00181544	0.00398951	0	0.00159792	0.00141636	0	0.038096	0.0387125	0.0132608	0.172724	0.156674	0.16103
dnaX	B7HPT4	0.00719729	0.00424433	0.00748878	0.00203781	0.00182332	0.00179683	0.00196928	0	0	0.00866664	0.0138274	0.00526006	0.00751348	0.00969067	0.00359613	0.00551059	0.0050985	0.00659153
	B7HKD7	0	0	0.00300033	0	0	0.00287955	0	0	0	0.00833335	0.00984861	0.0112395	0.00602045	0.0129417	0.0172892	0.0147185	0.0136179	0.0290494
sasP2	B7HWM5	0.0153406	0	0	0	0	0	0	0	0	0	0	0	0	0.0137701	0	0.187929	0.159385	0.126446
spoVS1	B7HPC9	0.0121896	0.0143767	0	0.0690264	0.0864654	0.048691	0.0533641	0.0439761	0.0675002	0.0821978	0.0728579	0.0712693	0.114526	0.153184	0.146173	0.0746638	0.0690802	0.0781459
	B7HZB0	0	0	0	0	0	0	0	0	0	0.00579536	0.0154105	0.00586231	0	0	0	0	0.00568225	0.00550968
	B7HLA8	0.0729748	0.0797706	0.0944498	0.0866787	0.0595191	0.078206	0.0545438	0.0577906	0.0369602	0.121736	0.0987848	0.0832513	0.111484	0.10225	0.0978247	0.0908504	0.0857376	0.0945441
sdhC	B7HRG1	0.00966098	0	0	0	0	0	0.00528676	0	0	0.00930664	0.0123737	0.00470708	0.0050427	0.00433595	0	0.00986255	0.00912501	0.00442393
	B7HND4	0.0602903	0.0772912	0.0381847	0.40672	0.196565	0.151826	0.487716	1.16634	1.98863	0.00252517	0	0	0.00820943	0.00705886	0	0.00802803	0.00495179	0
	B7HN02	0.00981876	0	0.0102164	0	0	0	0	0	0	0.00945863	0.00838387	0.00956792	0.0205002	0.0352541	0	0.0100236	0.00927404	0.0359695
	B7HM12	0	0	0	0	0	0	0	0	0	0	0	0	0	0.0102266	0.00284625	0.00290766	0.00807066	0.0130426
	B7HU09	0.0128508	0.0126304	0.0144855	0.00848987	0.00868144	0.00962474	0.00820436	0.00515125	0.00148253	0.0196008	0.02286	0.0240014	0.019005	0.0240315	0.0117717	0.0218648	0.0202297	0.0245192
serS2	B7HT09	0	0	0	0.00531788	0.00237907	0	0	0.0141166	0	0	0.00400933	0	0	0	0	0	0	0
	B7HR51	0.0123021	0.0145095	0.0128004	0.0278654	0.0166216	0.0286653	0.0179522	0.0197253	0.00567694	0	0.0070029	0	0	0	0	0	0	0
phoR	B7HRM7	0	0.00202779	0	0	0	0	0	0	0	0.00165624	0.0029361	0.00167538	0.00179483	0	0	0	0.00487176	0.0031492
	B7HVA0	0	0.00158664	0.00139975	0	0	0	0	0	0	0.00129592	0.00229734	0.0013109	0.00140436	0.00241508	0.00134433	0.00137333	0.00254126	0.0061602
	B7HYP9	0	0	0	0.00771887	0	0.00680608	0.00745929	0	0.0188705	0.00656554	0	0	0	0	0	0	0	0
	B7HMW0	0	0	0	0.00682882	0.00611005	0.00602129	0.0527934	0.0652587	0.0751256	0.00580848	0	0	0.0251781	0.032474	0.042178	0.0123109	0.0170854	0.0165665
	B7HUC9	0	0	0	0	0	0	0	0	0	0	0	0	0	0	0	0.0261149	0.0345171	0.0301219
sipT	B7HZR3	0	0	0	0	0	0	0	0.00636056	0.0219668	0	0	0	0	0	0	0	0	0
glmS	B7HQZ1	0.101228	0.0967477	0.116224	0.0810422	0.0619005	0.0784303	0.0744965	0.0608661	0.043491	0.0975152	0.0879251	0.091839	0.0655914	0.0516988	0.03837	0.0552335	0.0560485	0.0671335
	B7HQD9	0.00237757	0.0084125	0.0123693	0	0	0	0	0	0	0.00916147	0.00203012	0.00463366	0	0	0	0	0	0
metI	B7HPF6	0.00562502	0.00331714	0.00877925	0.0127412	0.00570004	0.00561723	0.00615634	0.0033822	0.00389357	0.0352216	0.0408254	0.0411099	0.0205525	0.0378686	0.0421582	0.0200983	0.0239083	0.0154548
	B7HQQ4	0.0278427	0.0208971	0.0210693	0.0200665	0.0102596	0.0151659	0.0138512	0.00304385	0.00350407	0.0365747	0.0453864	0.0369973	0.0290658	0.0295362	0.0404702	0.0335915	0.0310795	0.0278174
	B7HXN9	0.0231004	0.0181635	0.024036	0.00872074	0.00780283	0.00768947	0	0	0	0	0.00657486	0	0	0	0	0	0	0
dat2	B7HX68	0.0171905	0.00405498	0.010732	0.0116814	0.0174198	0.0171667	0.0150514	0.016538	0.00951926	0.013248	0.0205497	0.0134011	0.025124	0.027775	0.0240499	0.0140393	0.0259789	0.0314874
	B7HMC0	0.0406987	0.0288007	0.0254082	0.0645303	0.115476	0.0894133	0.12472	0.0880965	0.0901479	0.0470472	0.0556018	0.0475908	0.0849734	0.0584514	0.0650726	0.0415479	0.0538172	0.022364
	B7HQF3	0.0185397	0.0163996	0.0241132	0.0104985	0.00939347	0.00925701	0.0101454	0.0111475	0	0.0223246	0.0197879	0.018066	0.0193542	0.020802	0.0185267	0.00946325	0.0131334	0.0169793
purS	B7HS30	0.179529	0.225858	0.199254	0.08133	0.145539	0.119521	0.130991	0.115143	0.0994146	0.149885	0.204391	0.186606	0.162428	0.0752032	0.107643	0.0733101	0.0452185	0.0109613
murA	B7HY94	0.0125097	0.0118034	0.0234295	0.00283356	0.00253531	0	0	0	0.00346364	0.0120509	0.0213632	0.0121901	0.00261186	0	0.0025002	0	0	0
	B7HZQ2	0.013809	0.0162867	0.0383155	0.0938361	0.0653017	0.0367732	0.231739	0.365335	0.420573	0.0266051	0.011791	0.00448542	0.240262	0.227247	0.289788	0.281943	0.247816	0.27823
	B7HKV9	0.00313123	0	0	0	0	0	0.0017135	0.00188274	0.00650222	0	0	0	0.00326879	0	0.00156453	0	0	0
gapN	B7HXL3	0.0487229	0.0287325	0.0530006	0.0376233	0.0359074	0.0353858	0.0218148	0.0106531	0.00306595	0.0576031	0.0491668	0.0453201	0.0184958	0.0258433	0.0221313	0.0180871	0.0271936	0.0365091
	B7HNM1	0	0	0.00735094	0	0	0	0	0	0	0.0068057	0.0180971	0.00344216	0.00368759	0.00317077	0.00705989	0	0	0.00970532
sun	B7HLJ8	0.0230252	0.0217252	0.0239577	0.0234694	0.0186658	0.0252927	0.01008	0.00276891	0.00637512	0.031053	0.0432528	0.0336555	0.0264404	0.0248015	0.0322128	0.0117528	0.0217478	0.0253048
bacC	B7HR45	0.103463	0.0976214	0.118418	0.128894	0.12319	0.15498	0.104743	0.0559889	0.0465503	0.0897013	0.0861345	0.0856967	0.0378029	0.0441135	0.0284324	0.00528108	0.0097723	0.0094755
	B7HWP7	0	0	0	0	0	0	0	0	0	0	0	0.00188849	0	0	0	0.00197843	0	0
ddl	B7HRY4	0.0571904	0.0404711	0.0743833	0.0388624	0.0260789	0.0342668	0.0219074	0.0171937	0.0158346	0.0606021	0.0585993	0.0585158	0.0119406	0.0205342	0.0285753	0.0437878	0.0756247	0.0785655
	B7HUH8	0.00730193	0	0.00759765	0	0	0	0	0	0	0.00351706	0.00311742	0	0	0.00327719	0	0	0.00689683	0.0133747
	B7HZ13	0.124794	0.134919	0.0541033	0.141334	0.147535	0.155776	0.113818	0.0875417	0.100778	0.0701264	0.0532784	0.0810704	0.0542817	0.0840133	0.0623534	0.0743153	0.0589353	0.0285727
	B7HTC1	0	0	0	0	0	0	0	0	0	0	0.0168582	0	0.00687026	0.00590738	0.00657655	0	0	0
	B7HXX7	0	0	0	0	0	0	0	0	0	0	0	0	0	0.0116773	0.00650003	0	0.00614371	0.0119142
	B7HN99	0.0445412	0.070044	0.0875408	0.12331	0.100301	0.0790748	0.0758309	0.113078	0.123324	0.143025	0.164806	0.192904	0.216991	0.208791	0.296734	0.191987	0.205676	0.203962
	B7HMC1	0	0	0.0154906	0	0	0	0	0	0	0.0382444	0.0550855	0.0241789	0.0880698	0.0846356	0.1091	0.0455949	0.0656215	0.0908978
	B7HU49	0	0	0	0	0	0	0	0	0	0	0	0	0	0	0	0.0195638	0.0103433	0.0125365
	B7HVS3	0.00358144	0.00422403	0.0111794	0	0	0.00715296	0	0	0	0.0138003	0.00611611	0.0104698	0.00373877	0.00642955	0.0107368	0	0	0.00656001
	B7HQR5	0.209148	0.209299	0.185965	0.28855	0.222213	0.241769	0.288557	0.301814	0.229877	0.225898	0.190489	0.166749	0.423439	0.366369	0.301469	0.367499	0.343608	0.335494
spoIIE	B7HPX3	0	0	0	0	0	0	0.00272978	0.0014997	0	0	0.00212969	0	0.00520752	0.0111942	0.00373867	0.00127311	0	0.00114213
	B7I009	0	0	0	0	0	0.0131902	0	0	0	0	0	0.012871	0	0	0.0131992	0.0404522	0.0124757	0.0120968
	B7HYP4	0	0	0	0	0	0	0	0	0	0.00922273	0.0163496	0.0139939	0	0.00429686	0	0	0	0.00438405
	B7HQF5	0.00815672	0.00641349	0.00848707	0.00615856	0.00551034	0.00271514	0.00595146	0	0	0.0104767	0.00696472	0.00264945	0.00283835	0	0	0.00277564	0.00513614	0.00498015
	B7HPI9	0.0168534	0.00993868	0.0292267	0.00636242	0.00569274	0.0112201	0	0	0	0.0378824	0.0287811	0.0328458	0.0293231	0.0277347	0.0196486	0.0315427	0.03449	0.036015
sipU	B7HVV0	0	0.00657271	0.00579851	0.0189344	0.0338828	0.0222604	0.0243968	0.0402097	0.0540041	0.00536842	0.0142753	0.00543044	0.0116353	0.0200091	0.0167068	0.0113782	0	0.0102076
	B7HRZ4	0.019493	0.0131374	0.0231799	0.00946142	0.00705463	0.0111234	0	0	0	0.0268258	0.0356664	0.0257789	0.00726762	0.0187471	0.00695692	0.0113713	0.0144662	0.015302
	B7HNP1	0	0	0.00409956	0.00892441	0.00399253	0.00786907	0.0172486	0.0142142	0.0218177	0	0	0	0	0	0	0	0.0037214	0.00360838
	B7HSM5	0.0144351	0	0.00166886	0.00908244	0.00568852	0.00560588	0.0061439	0	0	0.0131331	0.00684756	0.0062517	0	0.00287939	0.000801391	0.000818683	0	0.000734455
	B7HXT3	0	0	0.00291277	0	0	0	0.00306382	0.0168321	0.046505	0	0	0	0	0	0	0	0	0
pfl	B7HU44	0.0339412	0.0176137	0	0	0	0.00135577	0	0	0	0.0104628	0.0127517	0.00132296	0	0	0	0	0	0
	B7HP81	0.0109143	0	0.0113563	0	0	0	0	0	0.0151095	0	0	0	0	0	0	0	0	0
ftsY	B7HLI0	0.0440408	0.0296816	0.0360049	0.0178136	0.0159386	0.0157071	0.0137716	0.0113489	0.00435493	0.0333343	0.0429769	0.0306541	0.0361237	0.0254134	0.0314358	0.0256913	0.0267413	0.0230481
ilvC	B7HKC3	0.0624467	0.0294605	0.0649758	0.123766	0.0885914	0.0935404	0.177698	0.146436	0.0994173	0.0601563	0.0666511	0.0395534	0.149937	0.120515	0.137287	0.086062	0.0973208	0.0915055
	B7HL57	0.0872579	0.102914	0.0726335	0.0790588	0.106106	0.139419	0.1146	0.041973	0.0724788	0.033623	0.059605	0.068023	0.0910913	0.0626597	0.0523182	0.0356314	0.0989005	0.0639312
	B7HXT7	0	0	0	0	0	0	0	0	0	0	0	0.00124025	0	0.00228492	0.00254375	0.00389795	0.00721291	0.0116564
	B7HPU5	0	0	0.00425292	0	0	0.00408173	0	0	0	0	0.00349006	0	0	0	0	0	0	0
	B7HYR1	0.00112959	0	0	0	0.00114466	0	0	0	0	0	0	0	0	0	0	0	0	0
	B7HY00	0.00421567	0.00497207	0.00877282	0	0.0042719	0.00841968	0	0	0	0.00812211	0.0107988	0.0123239	0.00880175	0.00756816	0.0168509	0.0172145	0.0119454	0.0154435
	B7HUU2	0.00971333	0	0.0101067	0.0330023	0.0393715	0.0581993	0.0531541	0.0584041	0.0403407	0.00935707	0	0.00946518	0.0709803	0.0435945	0.0485328	0.059496	0.0275234	0.0266874
	B7HVC3	0.00371693	0.00438384	0.0116024	0	0	0	0	0	0	0.0035806	0	0.00362197	0	0	0	0	0	0
	B7HKW1	0	0	0	0	0	0	0	0	0	0	0	0	0	0	0	0	0.0149166	0.0144635
	B7HUX3	0.0232606	0.0274341	0.0161351	0.0351248	0.0314277	0.0348426	0.0127288	0.0139861	0.0053669	0.00746914	0	0.00755544	0.00404707	0.00695973	0.0154962	0.0277035	0.0219701	0.0390552
	B7HN25	0	0	0	0	0.00847788	0	0.0274697	0.0301828	0.0231642	0	0	0	0	0	0	0.145195	0.205456	0.153243
	B7HXU4	0.0283215	0.043424	0.0500965	0.0737733	0.0602684	0.0707058	0.120887	0.136233	0.145068	0.0218262	0.0241827	0.0220784	0.0975669	0.0915193	0.121698	0.159018	0.144452	0.168596
	B7HXB4	0.00884541	0.00521625	0.00920364	0	0	0	0	0	0	0	0	0	0	0	0	0	0	0
	B7HW40	0.00376087	0	0.0117395	0	0	0	0	0	0	0	0	0	0	0	0	0	0	0
	B7HZY7	0.012361	0.0145789	0.0128616	0	0.00835058	0.00411463	0.00450953	0.00495493	0	0.0277845	0.0211092	0.0120452	0.0172054	0.0110955	0.0205873	0.00420631	0.0194587	0.0150942
tpx	B7HRT7	0.313495	0.354652	0.332848	0.369538	0.40844	0.421674	0.350109	0.34622	0.425138	0.394445	0.333236	0.417705	0.520956	0.470914	0.505078	0.346161	0.296103	0.304688
	B7HNG9	0.0128819	0.00759661	0.0067018	0.00729465	0.00652684	0.0128641	0	0	0	0	0.00549968	0	0.0268956	0.0346892	0.0193093	0	0.00608361	0.0117977
	B7HVY1	0.00583376	0.013761	0.00607003	0.00660699	0.00591157	0.0116514	0.0063848	0	0	0.0168594	0.0249062	0.0113694	0.0243602	0.010473	0.0291485	0.0178664	0.00551012	0.0160283
	B7HR54	0	0	0.00786624	0	0	0	0	0	0	0.00364139	0.0225934	0.00736692	0	0.0135721	0.00377739	0	0	0.0138475
accB	B7HNU8	0.231431	0.204717	0.160536	0.131053	0.136802	0.160494	0.147753	0.0695772	0.0800971	0.161014	0.13723	0.15661	0.181199	0.150033	0.128483	0.131256	0.109296	0.0824262
	B7HKH3	0	0	0.00604818	0	0	0	0	0	0	0.00559956	0	0	0	0.0104353	0	0	0	0.00532353
	B7HVW7	0.0105746	0.00623595	0.0238395	0.141718	0.139303	0.0932793	0.250757	0.339106	0.578248	0.0831915	0.0737387	0.0961745	0.241021	0.223061	0.389225	0.0953576	0.11819	0.188849
	B7HU65	0.0225164	0.00580922	0.0102499	0.0103597	0.00784325	0.00843198	0.00693092	0.00592315	0.0029223	0.0216906	0.0210284	0.0130276	0.0183638	0.0265273	0.0133598	0.015803	0.0146212	0.0167549
	B7HWJ3	0.064643	0.0698881	0.0840763	0.0671101	0.0382113	0.0537946	0.0412702	0.0453465	0.0149151	0.192006	0.225385	0.230969	0.247437	0.222429	0.236859	0.164979	0.152642	0.217075
	B7HYE0	0.0752029	0.0578453	0.0646401	0.0333276	0.0198798	0.0326516	0.0143141	0.0157279	0.0135795	0.0346474	0.0614211	0.0318616	0.00682666	0.0176097	0.016337	0.00667582	0.00617659	0.0089835
	B7HZL8	0	0	0	0	0	0	0	0	0	0.00587704	0.00347283	0.0039633	0	0	0	0	0	0
aroC1	B7HL26	0.0324713	0.0287231	0.0281553	0.0245167	0.0274203	0.0297241	0.0148077	0.00976212	0.00374604	0.0521338	0.041589	0.0474626	0.0338978	0.0170024	0.0243365	0.0165744	0.0255582	0.0272601
	B7HRD9	0	0	0	0	0	0	0	0	0	0	0.00324524	0	0	0	0	0	0	0
bioA	B7HNN6	0.0770442	0.0700981	0.0870357	0.0423815	0.0401512	0.0483608	0.0337286	0.0291185	0.0152369	0.0657363	0.0695443	0.0536257	0.0505553	0.0434699	0.0351956	0.0224719	0.0332663	0.0483839
	B7HT96	0.185399	0.167214	0.187234	0.216148	0.221026	0.206924	0.190975	0.144263	0.158527	0.236381	0.181586	0.212544	0.216314	0.244733	0.201617	0.183701	0.159662	0.149819
	B7HRG2	0.0131599	0	0.0136928	0	0	0.00657082	0.00720145	0	0	0.0190158	0.0112367	0.0128237	0	0.00590629	0	0	0	0
	B7HTS0	0.0140697	0	0.00975965	0	0.0142573	0.00468339	0.0102658	0	0	0.0135536	0.0120135	0.00914014	0	0.00420974	0	0	0.0044297	0
bioD	B7HNN5	0.0218579	0.0257797	0.0409376	0.014853	0.00885975	0.0130966	0.0143535	0.0105141	0.00605191	0.0168449	0.0261291	0.0212994	0.0136909	0	0.00873704	0.00446278	0	0
	B7HZA1	0	0	0	0	0	0	0	0	0	0	0.00686806	0.00391902	0.00419844	0.00361002	0.00401896	0	0.00379864	0.0110498
	B7HVK2	0.0644885	0.0543281	0.0862718	0.114771	0.0933551	0.119599	0.0604971	0.0443149	0	0.115372	0.133728	0.116705	0.105791	0.148851	0.101268	0.0470243	0.0522093	0.0590609
	B7HR52	0.0608407	0.0587103	0.0690597	0.16913	0.151328	0.154653	0.0968546	0.0731643	0.0382848	0.0319687	0.0566723	0.0269484	0.00577396	0.00496473	0.00552712	0	0	0
	B7HV71	0.0072381	0	0.00376562	0	0	0	0.0039609	0.00435211	0.00501013	0.00697263	0.00618035	0.00352659	0.0302243	0.0129942	0.0216992	0.0147782	0.0136731	0.00662891
	B7HN31	0.0269383	0.0317717	0.0224234	0.0183053	0.00545951	0.0215208	0.0117931	0	0	0.0363304	0.0368026	0.0315001	0.016873	0.0241804	0.0107678	0.0165002	0.0101775	0.0246711
	B7HW37	0.00671561	0	0.00698759	0	0	0	0	0	0	0.00323465	0.00573421	0.00327202	0	0	0	0	0	0
	B7HN12	0.00390993	0.00461147	0.0122048	0.00442817	0	0	0	0.00470191	0	0.00376652	0.00667709	0.00762008	0.0081634	0.0105289	0.0039072	0	0.00738603	0.00358085
	B7HKM6	0	0	0	0	0	0	0	0	0	0.00438871	0.00389003	0.00887884	0	0	0	0	0	0
	B7HT32	0.206294	0.184444	0.197339	0.180881	0.144983	0.215977	0.178439	0.144047	0.110551	0.195523	0.181829	0.168601	0.125046	0.107521	0.103075	0.108696	0.109996	0.0944659
sdaAA2	B7HNQ4	0.0115027	0.00904441	0.0159581	0.00434245	0.00388538	0.00765788	0.00839283	0.00922178	0	0.0295489	0.0327392	0.0373629	0.0200134	0.0137668	0.0344841	0.0273997	0.0325938	0.0316038
	B7HQS6	0.038241	0.0200455	0.0353686	0.0240609	0.00861133	0.0169725	0.013951	0.015329	0	0.0573042	0.0689331	0.0496854	0.00887132	0.0419539	0.0127381	0.013013	0.0280929	0.0233483
atoD	B7HQ87	0	0	0	0	0	0	0	0	0	0.00444109	0.00393646	0.0089848	0.00962542	0.0124146	0.0230348	0.0141191	0.0130633	0.0126665
	B7HX90	0.0139015	0.00546525	0	0	0	0	0	0	0	0.00446387	0.01187	0.0180618	0	0.00831886	0.0138918	0.00473051	0.00875351	0.0127315
	B7HRR1	0	0	0	0.0284526	0.0169719	0.00836266	0.036661	0.0302115	0.0463725	0.00806711	0.00715046	0.00816031	0.0174843	0.0225507	0.00836841	0	0	0.00766944
	B7HP31	0.00781237	0	0.0162575	0	0.00263885	0	0.0028501	0	0	0.0225775	0.035577	0.0152256	0.0217482	0.0257127	0.0208184	0.00531691	0.00737895	0.0119247
	B7HZ49	0.0276836	0.027209	0.0384064	0.0261274	0.0187019	0.0276453	0.020199	0	0	0.0533366	0.0630347	0.0629449	0.0385331	0.0538405	0.0645501	0.0376817	0.0479377	0.0591586
nagE	B7HU36	0.00433097	0.00255403	0.00225319	0	0	0	0	0	0	0.00208606	0.00184903	0.00211016	0	0	0	0	0	0
pgsA	B7HLB6	0	0	0.00557506	0	0	0.00535064	0.00586416	0	0	0.00516154	0.00457504	0	0.00559344	0.00480951	0.00535432	0.0164096	0.0151824	0.0049071
	B7I0L9	0.191304	0.145995	0.251742	0.127447	0.148242	0.157326	0.1909	0.270651	0.249258	0.26017	0.278651	0.235762	0.334805	0.323235	0.320491	0.304431	0.313551	0.334947
infC	B7HRL4	0.218014	0.221419	0.195338	0.15089	0.165691	0.151189	0.13256	0.094674	0.0586861	0.22752	0.222351	0.289161	0.22127	0.250054	0.266276	0.228745	0.200199	0.171934
	B7HQ90	0	0	0	0	0	0	0	0	0	0.0101409	0.0149811	0.00341937	0.00366317	0.0157488	0.0175328	0.0214934	0.0298291	0.0289231
loN	B7HQN0	0.0199058	0.0156516	0.027616	0.0180354	0.0121028	0.018553	0.00290481	0.00478757	0.00183714	0.0306812	0.0385262	0.0284493	0.00969748	0.0190591	0.00795677	0.00541897	0.0125343	0.0170151
	B7HVU5	0	0	0	0	0.0045849	0.00451829	0	0	0	0.00871721	0.0077267	0.00881793	0	0	0	0	0	0
	B7HTQ4	0.0711575	0.0774691	0.068344	0.0495932	0.0554665	0.071059	0.0599068	0.0658237	0.0454656	0.0421831	0.03739	0.0426705	0.0514271	0.0393062	0.0492285	0.0502907	0.0310199	0.0300778
hemB	B7HQM2	0.0568701	0.0409897	0.0591734	0.0715643	0.0480238	0.0567914	0.0311209	0.0265959	0.00874775	0.0730457	0.0944208	0.058496	0.0758598	0.0453759	0.0726167	0.0612821	0.0626676	0.0578708
	B7HP51	0.00436958	0	0.00454654	0	0	0	0	0.00525466	0.00604914	0	0	0	0	0	0	0	0	0
	B7HNL0	0	0	0.00621586	0	0	0	0.0065382	0.00718397	0	0.0172644	0.0102018	0.0116426	0	0.0107246	0	0	0	0
prfA	B7HY89	0.087437	0.053226	0.0997825	0.0255552	0.034298	0.0535163	0.0493915	0.0339187	0.0234282	0.0869472	0.0987428	0.0659638	0.0323891	0.0430404	0.0281858	0.0316734	0.0452892	0.0568295
ftsE	B7HX12	0.106951	0.103206	0.121399	0.044046	0.0492623	0.058256	0.0585265	0.0409227	0.02692	0.098345	0.107925	0.108956	0.0507497	0.0567281	0.0728701	0.0397026	0.045917	0.0489747
polC	B7HLF1	0.00638943	0.000837317	0.00147738	0.00160807	0	0	0	0	0	0.00889067	0.0054557	0.0048426	0.00518788	0.00509804	0.00283777	0.00362375	0.00536441	0.0045513
	B7HNL7	0.00593105	0.00932696	0.00822834	0	0.00200338	0	0.0238013	0.0261522	0.0629495	0.015236	0.016881	0.0211916	0	0.00532384	0.00592691	0	0	0.00724249
	B7HRJ0	0.00860244	0	0	0.014614	0.0130757	0.0257716	0.0517825	0.0206898	0.0357271	0.00414346	0.00367265	0	0.0179607	0	0.0128947	0.00439096	0	0
	B7HK72	0.0458008	0.0360124	0.0476557	0.0172905	0.0928232	0.0609832	0.050127	0.110156	0.0422704	0.014707	0.0130359	0.0148769	0.0637505	0.0959275	0.0305125	0.0467564	0.0432598	0.0978739
	B7HKG3	0.00486287	0.00573539	0.0101196	0.00550741	0	0.00485614	0.0053222	0.0116957	0.0134641	0.018738	0.0166089	0.0189545	0.010153	0.0261901	0.00485948	0.014893	0.00918617	0.0178144
	B7HW17	0.275147	0.272295	0.256674	0.21849	0.224335	0.205285	0.186913	0.209177	0.236426	0.43262	0.440171	0.425291	0.353266	0.343499	0.369768	0.255059	0.28378	0.295436
comJ	B7HMX8	0	0	0	0.0087069	0.00779045	0.00767728	0.084141	0.0924515	0.0851439	0	0	0.00749151	0.0160513	0.0276034	0.0384128	0.0313933	0.0217842	0.0422452
	B7HQ30	0	0.00247164	0	0	0	0	0	0	0	0.026244	0.0250513	0.0163367	0.0590678	0.0489082	0.0460717	0.0684594	0.0712573	0.0652546
	B7I049	0.0133608	0	0.00463397	0	0	0.00889487	0	0	0	0.017161	0.015211	0.00433982	0.0139478	0.0079953	0.017802	0.00909304	0.0126196	0.0163151
	B7HW02	0.0150834	0.00889489	0.0156943	0	0	0	0	0	0	0.0435907	0.0643959	0.0587924	0.0314922	0.0541569	0.0452187	0.0230972	0.0356166	0.0345349
hemN	B7HPL6	0	0	0	0	0	0	0	0	0	0	0.00224039	0	0	0	0	0.00267857	0	0.00240299
topA	B7HLG6	0.011603	0.00513183	0.0166003	0.00492785	0	0.011587	0.00158738	0.00348832	0	0.0251493	0.0297222	0.0197865	0.00605638	0.00911324	0.00289873	0.00888384	0.00684957	0.0119548
rnj1	B7HLD1	0.0960697	0.106642	0.101921	0.170672	0.141254	0.154251	0.138131	0.122325	0.0860567	0.112507	0.12385	0.126656	0.116022	0.106525	0.10918	0.119227	0.115649	0.113862
	B7HTR0	0.00366536	0	0.00381381	0.00415118	0.00371424	0.00366029	0.00401158	0.0044078	0.00507424	0.00706185	0.00312971	0.00714344	0.00765277	0.00658021	0.0109884	0.00748367	0.00692403	0.0100706
	B7I0L8	0.0139842	0.00824666	0.0218258	0.00791886	0.0141707	0.0139648	0.0229577	0.0168168	0.00967971	0.020207	0.0179109	0.0204404	0.0291971	0.0376576	0.0349361	0.0785179	0.0858545	0.0768434
lysA	B7HKE3	0.00473529	0.00558492	0.00739061	0.00804439	0.00719767	0.00472874	0.00518257	0.00284723	0	0.0661434	0.0727792	0.0622933	0.0420182	0.042505	0.0425879	0.0193364	0.0313081	0.0325256
	B7HPF0	0.0060842	0.00717586	0.0126612	0	0.00616534	0.00607578	0.0066589	0.00731659	0.00842283	0.0117221	0.0155852	0.00592877	0.012703	0.0163839	0.00607996	0.00621115	0.0114933	0.0111443
pbpC	B7HQ34	0.0423409	0.0462388	0.0407923	0.0301926	0.0222474	0.0344523	0.0102978	0.0169724	0.0195386	0.0347453	0.0374923	0.0244499	0.0180078	0.0225222	0.00940253	0.0192108	0.0251801	0.0272877
truA	B7HU22	0	0	0	0	0	0	0	0	0	0	0.0175017	0	0.00427951	0	0.00409656	0	0	0
	B7HKR6	0	0	0	0	0	0	0	0	0	0.00584642	0.00777315	0.00295698	0.00316782	0.00817152	0.0151619	0.00309782	0.00859847	0.00277911
nheB	B7HMQ3	0.0691941	0.0753316	0.0747655	0.554585	0.372159	0.454454	1.1476	1.42097	2.0374	0.0307644	0.00908958	0.00518664	0.0138911	0.0238885	0.00531891	0.00271684	0	0
	B7HLV4	0.00532883	0.00314248	0.00554465	0.0241406	0.0161997	0.0212858	0.0554057	0.0704904	0.1291	0	0.00227505	0.00259635	0	0	0	0	0	0
rpsC	B7HQV0	0.51486	0.534815	0.511137	0.390517	0.344626	0.334903	0.273991	0.272652	0.222329	0.445923	0.479951	0.543132	0.374755	0.377351	0.462578	0.265212	0.28107	0.289838
	B7HKU2	0.257866	0.27372	0.258248	0.324899	0.264571	0.28326	0.268112	0.271336	0.267738	0.291879	0.280732	0.241855	0.168246	0.150453	0.154612	0.0954267	0.097424	0.100369
	B7HN94	0	0	0	0	0	0	0.0228952	0.0419275	0.0386135	0	0	0	0.0145588	0.0312959	0.0209046	0.00711857	0.0131725	0.0255448
	B7HQM0	0.00594307	0	0.0309188	0	0	0	0.00975665	0.0142937	0.0164549	0	0	0	0.0496333	0.050679	0.0237557	0.0940396	0.0785871	0.0734788
	B7HXQ0	0.022694	0.0152948	0.0303597	0.00734341	0.00328523	0.00647502	0.00354823	0	0	0.0312309	0.0415233	0.0252734	0.0101533	0.0203706	0.0161987	0.0132386	0.0244971	0.020784
	B7I003	0	0	0	0	0	0	0	0	0	0	0	0	0.0214832	0	0	0.0630255	0.0388749	0.0753883
sigE	B7HM25	0	0	0	0.0141081	0.0042077	0.00829316	0.0318118	0.0449406	0.0229935	0.00400003	0.00354552	0	0.0953644	0.0894533	0.124483	0.0890182	0.105893	0.0912684
spo0J	B7HZG5	0.0138998	0.00819687	0.0361568	0.0314842	0.0105639	0.0104104	0.0152127	0.0208941	0.00962127	0.0502124	0.0504411	0.0304755	0.0217656	0.0280727	0.0277802	0.0177372	0.0164108	0.0254598
	B7HT08	0.0022875	0.00269793	0	0	0	0	0	0	0	0	0	0	0	0	0	0	0	0
bfmbAb	B7HNS4	0.125045	0.132354	0.1201	0.1162	0.10072	0.0928531	0.105274	0.08097	0.0665803	0.129724	0.114984	0.115601	0.0736368	0.0805845	0.0801008	0.0687365	0.0635962	0.0822197
	B7HZB8	0.0136892	0.00922592	0.0244176	0.0088592	0.00792671	0.0117173	0.00856127	0.00705514	0	0.00941936	0.0217076	0.0171507	0.00612453	0.00175539	0.0058627	0.0039928	0.0018471	0.00716402
	B7HP37	0	0	0	0	0.0086498	0	0.00934224	0	0	0	0	0	0.00891095	0	0	0	0	0
	B7HZU1	0	0	0	0	0.0163923	0.0161542	0	0	0.0223944	0	0	0	0	0	0	0.214683	0.106954	0.133336
sspF	B7HPV5	0	0	0	0	0	0	0	0	0	0	0	0	0	0	0	0.0344568	0.0797002	0
	B7HW82	0.00660494	0.011685	0.00343622	0.00748039	0.00334652	0.0065958	0.00722883	0.0039714	0	0.00636269	0.00845957	0.0064362	0	0.00592874	0.00660034	0.00337138	0.00623852	0.00302452
resA	B7HKY2	0	0	0.00599226	0	0	0	0	0	0	0.00554779	0.0196696	0.00561189	0	0	0.005755	0	0.010879	0.0158229
	B7HYD9	0	0	0	0	0	0	0	0	0	0.00641516	0.00568623	0.00432619	0	0.00199255	0	0	0.00209665	0.00406595
	B7HQ21	0.0136077	0.0160492	0.0212382	0.00770565	0.00689458	0.0203833	0.00744651	0.00818199	0.00941908	0.0262172	0.0232382	0.0198901	0.00710274	0.0244291	0.00679909	0.0069458	0	0
	B7HKS1	0.024339	0.0246051	0.108534	0.224457	0.165598	0.197914	0.331071	0.602104	0.861611	0.00334947	0.00296887	0.00338817	0.112522	0.0405733	0.0382202	0.0674413	0.0229887	0.0413966
	B7HZL6	0.0335132	0.0179665	0.0317004	0.0138019	0.0123491	0.0152122	0.00666886	0.00366377	0	0.0352189	0.0364199	0.0296882	0.025444	0.0164085	0.0243562	0.0186613	0.0287763	0.0279023
	B7HUV6	0.0190757	0	0.00992416	0.0324062	0.0289952	0.028574	0.0313164	0.0229396	0.013204	0.0183761	0.00814403	0.0278826	0.0298707	0.0342456	0.0381249	0.0292106	0.0180175	0.0436756
	B7HPK9	0.0156021	0.0131439	0.00927655	0	0	0	0	0	0	0.00858848	0.00761259	0.00651578	0	0.00800273	0	0	0	0
	B7HNK4	0.0370544	0.0218514	0.0433745	0.0524572	0.0516293	0.0323777	0.0709703	0.0835499	0.0320608	0.0624669	0.0593238	0.0451347	0.0386823	0.0582065	0.0786857	0.0330991	0.0306239	0.0466617
radA	B7HQR6	0.0023016	0	0.00239482	0	0	0.00229842	0.00503801	0.0027678	0	0	0.00196525	0	0.00240272	0.00413194	0	0	0.00217391	0.00210789
recG	B7HLI8	0	0	0.00153692	0	0	0	0	0	0	0.00142292	0	0.00143936	0	0	0	0	0	0
	B7HNI7	0.0049452	0	0	0	0	0.00493835	0.0054123	0	0	0.0190553	0.0337802	0.0240943	0.0258122	0.0443892	0.0444757	0.0252419	0.0233542	0.0271739
	B7HQY1	0.0267407	0.0315386	0.0309152	0.00673	0.0120433	0.00593415	0.00975551	0	0	0.0429332	0.0405918	0.0434292	0.0372206	0.0373381	0.0356294	0.0212323	0.0168381	0.0272112
thiS	B7HWF3	0.123036	0.126973	0.0800118	0.121926	0.171431	0.138224	0.168322	0.184947	0.21291	0.0444462	0.0393959	0.0299732	0.0963308	0.0966348	0.061475	0.0942022	0.0871576	0.0985956
	B7HLK7	0	0	0	0	0	0	0	0	0	0	0	0	0.00967312	0.0124761	0.00578724	0.0153715	0.015316	0.0190939
	B7HZZ1	0	0	0	0	0	0	0	0	0	0	0	0	0	0	0	0.00339043	0.00941065	0.00912484
	B7I0E8	0.0733827	0.0556389	0.0872625	0.178091	0.164657	0.136094	0.114735	0.119763	0.101589	0.0454444	0.0492319	0.0561848	0.0601908	0.06587	0.0785695	0.0321059	0.0346558	0.0288028
	B7HMW7	0	0	0.00201913	0	0	0	0	0	0	0	0.00331391	0	0	0	0	0	0	0
	B7HUF7	0	0	0	0	0	0	0.0135071	0.0111309	0.0128139	0.00297219	0.00263447	0	0.0289881	0.0360032	0.0246656	0.0314973	0.0699404	0.113027
	B7HSL6	0.041999	0.0353819	0.0374571	0.0747462	0.0668787	0.0599156	0.0590993	0.0216455	0.0166121	0.0693576	0.0717228	0.0760055	0.0814248	0.096941	0.0839395	0.0796256	0.05667	0.0439591
	B7HUU9	0	0	0.00549315	0.0179373	0.021399	0.0210881	0.0231121	0.0126974	0.0292344	0.0101714	0.0180313	0.0102889	0.0110225	0.0142166	0.0211026	0	0.00498646	0.00483501
alkK	B7I082	0	0	0	0	0	0	0	0	0	0	0	0	0.00198532	0.00512123	0	0.00388291	0.00359254	0.00522514
prfB	B7HX15	0.039536	0.0248692	0.0383947	0.0149254	0.0213671	0.0236888	0.0115388	0.00633923	0.0145954	0.040625	0.0562639	0.0410943	0.0247637	0.0260248	0.0263389	0.0215258	0.0323636	0.0265529
	B7HZV9	0.156782	0.156464	0.169406	0.109269	0.0824916	0.108391	0.0725962	0.0652634	0.0333916	0.191694	0.182784	0.170405	0.0786872	0.0838972	0.0783362	0.0861824	0.0968241	0.104929
	B7HK77	0.0154855	0.018264	0.0214835	0.035076	0.0104613	0.0206187	0.0169482	0.0186221	0.0142918	0.0248625	0.0352599	0.0301797	0.0215544	0.0278002	0.0309494	0.0105391	0.0146264	0.0189095
	B7HRY1	0	0	0	0	0	0	0	0	0	0.00490208	0.0108627	0.00991743	0.00796841	0.0114194	0.00762776	0.00779234	0.0144192	0.0163115
pdhC	B7HMU0	0.267016	0.294323	0.301199	0.144138	0.139082	0.152013	0.109248	0.0900284	0.086367	0.230779	0.230126	0.21156	0.12244	0.10752	0.112218	0.122282	0.139065	0.137127
	B7HQP3	0.0150393	0.0118251	0.0260806	0.00567754	0.00507994	0.0250307	0.0054866	0	0	0.0193169	0.00428049	0.0244251	0.0104666	0.0179994	0.0100192	0.015353	0.00946994	0.0137735
	B7HV63	0.0239194	0.0141056	0.0248882	0.00225748	0.00605961	0.00995263	0.00436313	0.00479407	0	0.0441641	0.0459538	0.0388473	0.0499405	0.0536765	0.0438217	0.183139	0.180739	0.160646
	B7HYC6	0.015639	0.00368901	0.0130179	0.0106271	0.0158476	0.00624695	0.00342325	0.00376136	0.00866012	0.0120523	0.0106829	0.00609579	0	0.00280759	0	0.00319306	0.00590856	0.00859366
hemH1	B7HZJ9	0.00650889	0.00383837	0.00338625	0	0.00329785	0.00324994	0	0	0	0.00627016	0.0166731	0.0095139	0.00339742	0.00584252	0.00325217	0	0.00307389	0.00596107
potA	B7I0J2	0.00613661	0.00723767	0.0127703	0.00347499	0.00310923	0.00306406	0.00335813	0.0036898	0.00424769	0	0.00523982	0	0	0	0	0.00313232	0.00289808	0.00281006
murG1	B7HM31	0.00579773	0.00341899	0.00603254	0	0	0.00289485	0	0	0	0	0.00247523	0	0	0	0	0	0	0
	B7HZH9	0.060532	0.030597	0.0269929	0.117523	0.0963903	0.0863546	0.123035	0.114389	0.0837991	0.033321	0.0369186	0.0252795	0.0812459	0.0698591	0.0777725	0.0706228	0.0571738	0.0237589
	B7HLF3	0.0146797	0.0028856	0.0152742	0.0110836	0.0049585	0.0122162	0.00803316	0.00882658	0.00338704	0.0259257	0.0334252	0.0262253	0.0229869	0.0219614	0.0317838	0.044958	0.0485286	0.0492954
	B7HUS7	0.0183521	0	0	0	0.0185968	0.0549801	0.0301284	0.0110347	0	0.0265185	0.0156702	0	0.0287375	0.00823662	0.00916964	0.03747	0.017334	0.0168075
	B7HPE4	0.0219402	0.0103507	0.0091315	0	0	0	0	0	0	0.0169084	0.0187339	0.00855186	0.00458081	0.00787759	0.00876994	0	0.0041446	0.00401872
	B7HTV0	0.00410213	0.00483815	0.00426826	0	0	0	0	0	0	0	0.00350265	0	0	0.00368216	0.00409927	0	0.00387455	0
	B7I0I5	0.0575203	0.0431715	0.0707317	0.0769887	0.0635863	0.0731063	0.165968	0.100613	0.15926	0.100747	0.0937639	0.112102	0.120095	0.136119	0.193342	0.0373676	0.0592682	0.129303
hemH	B7HZS9	0	0.00745411	0.0131522	0.0143156	0.0128088	0.0252455	0.00345855	0.00380015	0	0.00913248	0.0269826	0.00615866	0.00659777	0.0113462	0.00631571	0.00645199	0.0059695	0.00868229
cotF	B7HWL7	0	0	0	0	0	0	0	0	0	0	0	0	0	0	0	0.00634948	0.00587465	0
	B7HWB9	0	0.00808886	0.00713607	0	0.0138996	0.0205465	0.0375306	0.0247425	0.018989	0.0132135	0.0117121	0	0.0715961	0.0615617	0.0753888	0.0490098	0.0518226	0.0502487
pyrE1	B7HLL6	0.0959746	0.0714914	0.110373	0.0343249	0.0204746	0.0353101	0.0276421	0.0303723	0.0209787	0.0632583	0.120767	0.0935227	0.0474588	0.058944	0.0403822	0.0206267	0.0381685	0.0323831
kamA	B7HQ92	0.0126577	0.00746438	0.0373159	0	0.00213775	0.00210669	0.00923552	0.00761077	0.005841	0.0223546	0.0216158	0.0123343	0.0858893	0.0852135	0.0822175	0.116296	0.135495	0.164225
	B7HMD6	0.00459644	0.00271058	0.00717389	0	0	0	0.00503061	0.00552747	0	0.00442786	0.00784946	0.00447901	0.00959674	0.0226923	0.0206696	0.0398849	0.0499266	0.0463054
	B7HUP3	0	0	0.00624134	0	0	0	0.00656499	0.00721341	0	0.0115568	0.0102436	0.0116903	0.00626192	0.0107686	0.00599422	0.00612356	0.00566562	0.0109871
	B7HWM4	0	0	0	0	0	0	0	0	0	0	0	0	0	0	0	0.00635019	0.0176259	0.0113937
	B7HKJ3	0	0	0	0	0	0	0	0	0	0.00608093	0	0.00922678	0	0	0	0.00322208	0	0
	B7HXG3	0	0	0.0065595	0.029987	0.0217201	0.0289591	0.0910755	0.118266	0.171056	0.0133605	0.0150721	0.019658	0.00394868	0.00679053	0.0100797	0	0	0
	B7HSZ3	0.0061533	0	0.00960376	0	0	0.00614478	0	0	0	0.00592761	0.0105081	0.00899415	0	0.00276167	0	0	0	0.00845312
hisS	B7HXY9	0	0	0.0024891	0	0	0	0	0	0	0	0	0	0	0	0	0	0.0022595	0.00438175
	B7HQ82	0.00662484	0	0.00229772	0.00250097	0.00223773	0.00220522	0.00241687	0	0	0.00850915	0.00377114	0.00430373	0.00230529	0.0158576	0.00220674	0.00450871	0.0166862	0.0242691
	B7HNU9	0.00464947	0	0.00967555	0	0	0	0.0152659	0.0167737	0.0128732	0	0	0	0.0825134	0.116857	0.0882783	0.00949296	0.00878306	0.0170326
	B7HTE5	0.00815584	0.0096192	0.0169723	0.00923685	0.0165292	0.0162891	0.00892622	0	0	0.0157134	0.0487478	0.0238425	0.059599	0.0878504	0.0570511	0.016652	0.0462203	0.0522859
speE	B7HYD0	0.0958024	0.0869167	0.10735	0.0292117	0.026137	0.0220777	0.0241965	0.0132932	0.0102021	0.0532435	0.053486	0.050268	0.0230795	0.0165374	0.0331392	0.0150464	0.0348029	0.0303713
	B7HNH0	0	0	0	0	0	0	0	0	0	0.00302655	0.00804795	0	0.00655961	0.00564026	0.0125584	0.00641467	0.00890244	0.00863206
	B7I0B9	0	0	0	0	0	0	0	0	0	0	0	0	0	0	0	0.0158679	0	0.00355885
	B7HPK4	0.00649284	0	0.0101337	0	0	0.00324193	0	0	0	0.0187641	0.022176	0.0253079	0.0101671	0.0203984	0.0129766	0.0132566	0.0183979	0.0118927
	B7I0G4	0.00231675	0	0.00964229	0.00262382	0	0.00462708	0	0	0	0.00446355	0.00989091	0.00451512	0	0.00415912	0.00231513	0	0.00218822	0.00636527
cotJB	B7HXF2	0	0	0	0	0	0	0	0	0	0	0	0	0	0	0	0.0111255	0.0102935	0
glgA	B7HTX6	0.00207403	0	0.00215803	0.00234893	0.00420338	0.00207116	0.00226994	0.00249413	0	0	0	0.00202104	0.00433029	0.00372339	0.00207258	0.00423461	0.0058769	0.00759788
	B7HMY8	0	0	0	0	0	0	0	0	0	0.0145254	0.023604	0.0122444	0.00262348	0.00225579	0.00502264	0.00513102	0.00474731	0.00230156
bsaA	B7HP99	0.0193144	0.0303731	0.0200966	0.0218744	0.026096	0.0192876	0.0211387	0.0154844	0.0178256	0.0372119	0.0384809	0.0376419	0.0537677	0.046232	0.0579027	0.0328623	0.0486476	0.0294813
tal	B7HW93	0.0498442	0.04703	0.0829806	0.0677409	0.0808143	0.0647078	0.0763732	0.0959046	0.0828038	0.158453	0.17024	0.174855	0.135288	0.156594	0.204219	0.111945	0.131821	0.178031
	B7HWK6	0	0	0	0	0	0	0.00624359	0	0	0.0054955	0.00487106	0.005559	0.00595535	0.0051207	0.0114015	0	0	0.0052246
	B7HQ69	0	0	0	0	0	0.00255113	0.00279598	0	0	0	0	0	0.0026669	0.00229313	0.00510578	0.0130399	0.0241294	0.0140379
	B7HUA8	0	0	0	0.0691599	0.0309402	0.0304907	0	0.0550764	0.0634038	0	0	0	0	0	0	0	0	0
glcK	B7HPG3	0.0166477	0.0157078	0.0346439	0.00377085	0.0101218	0.0132997	0.00728808	0.00800791	0	0.0288668	0.0341156	0.0194669	0.0104274	0.00298867	0.00665443	0.013596	0.0157241	0.0152466
treC	B7HVD8	0	0	0	0	0	0	0	0	0	0.00168708	0.00149538	0.00170657	0	0	0	0	0	0
	B7HK90	0	0	0	0	0	0	0	0	0	0	0	0	0	0.00309672	0	0.0105657	0.00651705	0.00631912
	B7HX24	0.047287	0.0446171	0.0688829	0.0749764	0.0958352	0.113332	0.134559	0.102357	0.0916482	0.0546631	0.0807532	0.0921578	0.128347	0.161294	0.132311	0.067583	0.107193	0.112598
	B7HYN2	0	0	0	0	0	0	0	0	0	0	0.00313752	0	0	0.00329832	0	0	0.00173533	0.00336525
	B7HSI5	0	0	0.0028635	0	0	0	0	0	0	0.0026511	0.00469973	0.00536347	0	0	0	0	0.00259937	0
	B7HRF7	0	0	0	0	0	0	0	0.00470707	0.0325126	0	0	0	0	0	0	0	0	0
rocD	B7HZS5	0.222987	0.225426	0.248591	0.135291	0.137191	0.135198	0.107498	0.0861925	0.0992245	0.299198	0.283334	0.28196	0.22447	0.20969	0.214873	0.18699	0.183036	0.206651
dal2	B7HP06	0.00264299	0	0.00550006	0	0	0	0	0	0	0.0203684	0.0135405	0.0128773	0.00827731	0.00948963	0.00792344	0	0.00249636	0.0121027
dacA1	B7HPS5	0.0357671	0.0393723	0.0446588	0.0216042	0.0144977	0.0142871	0.00782912	0.00860239	0.0132041	0.0505344	0.0671885	0.0487947	0.0423169	0.0406668	0.0357422	0.0559872	0.0563047	0.0851677
estA	B7HW47	0.0162456	0.00958022	0.0169035	0.00459971	0.00411556	0.0121673	0	0	0	0.0352119	0.0312109	0.0237458	0.0169593	0.0072912	0.0162342	0.00414613	0.0153443	0.00743914
	B7HK71	0.010625	0	0.0110553	0.00601663	0.00538334	0.00530514	0.00581429	0	0	0.0102353	0.0136084	0.0155303	0.0110918	0.00476861	0.0106176	0	0	0
	B7HRE6	0.00224838	0.00265179	0.00233944	0	0	0	0	0	0	0.0108296	0.0134386	0.00657281	0.00469431	0.010091	0.00449362	0.00688587	0.00424729	0.00823658
	B7HVD0	0.0243961	0.0164419	0.0253841	0.00789419	0.00353164	0.010441	0.00381435	0	0	0.00335733	0.00892754	0.0101884	0	0	0.00348273	0	0.00658362	0.00319183
	B7HR29	0.00179931	0	0.00187219	0	0	0	0	0	0	0.00693328	0.0122909	0.00526004	0.00187836	0.00323021	0.00359612	0	0	0
ispA	B7HNU1	0.0175282	0.0165385	0.018238	0.00794056	0.0106572	0.0105023	0.00383676	0.00421571	0	0.0168853	0.01796	0.0170804	0.0109789	0.00629346	0.0140127	0.00357877	0.00662229	0.00963175
	B7HPR5	0.00797938	0.00941108	0	0.018074	0.0323432	0.0318733	0.0261993	0.0191913	0.022093	0.00768672	0.0068133	0.00777553	0.00832993	0	0.00797381	0	0	0
	B7HLB7	0.0167871	0.0277188	0.0139736	0.0190121	0.017011	0.0201167	0.0110237	0.00807497	0	0.00646857	0.00860034	0.0065433	0.0105148	0.0030137	0.00671016	0.00685495	0.00634232	0.00307485
	B7HX89	0.00265414	0	0	0	0	0	0	0	0	0.0102272	0.0181301	0.0103453	0.00277073	0.00476482	0.00265228	0.00812854	0.0100276	0.0048615
pta	B7HYE8	0.11245	0.0897179	0.10668	0.0711688	0.0737323	0.0726612	0.0579162	0.0437501	0.0228932	0.0955816	0.0818969	0.0902402	0.0448845	0.0593752	0.0528808	0.0540218	0.0687252	0.0575509
	B7I035	0.00591617	0.0104665	0.00615577	0.0100505	0.0119901	0.0177239	0.0226625	0.0213435	0.0245706	0.00569918	0.0025258	0.00288251	0.00308804	0.00531048	0.00591204	0.00603961	0.0139699	0.0135456
	B7HQI3	0	0	0	0.00533314	0	0.00470247	0.00515379	0.0113256	0.00651902	0	0	0	0.00491586	0.00422689	0	0.134603	0.128985	0.107817
	B7HMF3	0	0	0.00795852	0	0.0155015	0	0	0.00919804	0	0.0147364	0.00653098	0.0149067	0.0159695	0.0137314	0.0152868	0.00780834	0.00722441	0.01401
rfbC	B7I0C8	0	0	0	0	0	0	0	0	0	0	0	0	0.00578403	0.0149202	0	0.0339374	0.0366327	0.0253715
	B7HXN2	0.00405684	0.00717711	0.00633172	0	0	0	0	0	0	0.00977013	0.010392	0.00790641	0	0.00182076	0	0	0.00574767	0.0055731
gap2	B7HW56	0.728045	0.669539	0.750856	0.602969	0.503753	0.618141	0.498447	0.428115	0.395163	0.726059	0.676421	0.690693	0.465392	0.532595	0.512801	0.700671	0.757328	0.69908
	B7HMW2	0.00720685	0.00283331	0.0124979	0.00272069	0.00486865	0.00719688	0.0026292	0	0	0.00694252	0.00615366	0.00702274	0.00250782	0.00215634	0.00240061	0.00245241	0.00453802	0.00440019
holB	B7HPU2	0	0	0.00322714	0	0	0	0	0	0	0.00298777	0.0132414	0.00604458	0	0.002784	0	0	0	0
	B7HYH9	0	0	0	0	0	0	0	0	0	0	0	0	0	0	0	0.0405237	0.0749865	0.0363545
	B7HTR5	0.262618	0.16021	0.263832	0.179482	0.16059	0.212517	0.163535	0.0980109	0.0940249	0.191921	0.189444	0.167665	0.212707	0.21541	0.18099	0.286587	0.325029	0.319305
purB	B7HS28	0.190486	0.189475	0.22208	0.0987696	0.0930247	0.103133	0.0879127	0.0772765	0.0540117	0.170234	0.176366	0.167728	0.105417	0.0865222	0.0963232	0.0656011	0.0888752	0.0966852
	B7HV51	0	0	0	0	0	0	0	0	0	0.00410279	0	0	0.0044461	0.00382297	0	0.0130436	0.0120682	0.0117016
	B7HW66	0.0167379	0.0161518	0.012666	0.0103399	0.00770961	0.0151952	0.0116575	0.00548952	0.00210651	0.0395771	0.0363793	0.0311378	0.0254156	0.0218536	0.0167262	0.0264074	0.0229954	0.0236905
	B7HW96	0.00607061	0	0	0	0	0	0	0	0	0.00292398	0.0077752	0.00295776	0	0	0	0	0	0
qoxA	B7HWC4	0.048194	0.044661	0.0608914	0.0194935	0.0139534	0.0171883	0.0263731	0.0206986	0.0190625	0.0331617	0.0382117	0.0402538	0.0395303	0.02472	0.0309603	0.0386568	0.0325145	0.0535959
lonB	B7HQN1	0	0	0	0	0	0	0	0	0	0	0	0	0	0.00502045	0	0	0	0
	B7I0H0	0	0	0	0	0	0	0	0	0	0	0	0	0	0	0	0.0210047	0.0119593	0.0130456
	B7HVU9	0.00815845	0.00481114	0.00848887	0.0046199	0.00413363	0.00407358	0	0	0	0	0.0069662	0.011925	0.00425843	0	0.00815276	0	0	0
	B7HRH8	0	0	0	0	0	0	0	0	0	0	0	0	0	0.00392118	0	0	0.00412605	0.00400074
	B7HX23	0.0496399	0.056001	0.101055	0.163769	0.124661	0.163801	0.439354	0.558016	0.791778	0.0041582	0.00552857	0.00210312	0.00450614	0.0019373	0.0043135	0.00660986	0.00407704	0.0118597
ald2	B7HRR5	0.263218	0.239583	0.250063	0.0972084	0.0811782	0.0857131	0.0751514	0.0653711	0.0475295	0.214978	0.232081	0.211886	0.143364	0.148953	0.160108	0.160642	0.16214	0.151975
dacF	B7HN55	0	0	0	0	0	0	0	0	0	0	0	0	0.00272427	0.00234246	0.00260781	0.0239767	0.032043	0.0238999
	B7HXN7	0.00645962	0.00761864	0.026885	0	0	0.00645068	0	0	0	0.0435589	0.0386094	0.0566514	0.0202302	0.0347898	0.0322756	0.0197832	0.024405	0.0295798
spoIIIAG	B7HNV0	0	0	0	0	0	0	0	0	0	0	0	0	0.00482393	0.0124435	0.0046177	0.0188693	0.0174583	0.016928
ssb1	B7HZG0	0.115827	0.0790898	0.101489	0.0276168	0.0247099	0.0426142	0.046704	0.00733099	0.00843941	0.0587259	0.052053	0.0653448	0.03182	0.0492486	0.0243677	0.0248935	0.011516	0.0223324
	B7HSP5	0.00248537	0.0029313	0	0	0	0	0	0	0	0	0	0	0	0	0	0	0	0.00227619
	B7HNX3	0.0690027	0.045213	0.0239324	0.0260495	0.0310769	0.0229691	0.0167823	0	0	0.0369288	0.0392792	0.0522976	0.0320151	0.0481743	0.0459697	0.0391347	0.0362081	0.0280867
	B7HYZ7	0.00365853	0.00862991	0.0038067	0.00414344	0.00370732	0	0.0040041	0	0	0.0176217	0.0156194	0.0142602	0.0076385	0.0197038	0.0146239	0.0112046	0.0138222	0.00670122
	B7HYD4	0.0126241	0.00992615	0.0218924	0.0667212	0.0724909	0.0672356	0.0828995	0.101208	0.0990339	0.0202685	0.0143724	0.00820109	0.0219646	0.0226634	0.0252307	0.0171834	0.00794919	0.0231233
	B7HTM5	0.00686529	0.00809709	0.0142867	0.0388762	0.0278274	0.0617021	0.0375688	0.00825589	0.00950415	0.00661349	0.017586	0.0066899	0.0215007	0.0123249	0.0068605	0	0.00648442	0
mvaB	B7HS69	0	0	0	0	0	0	0	0	0	0	0.00293119	0	0.00358367	0	0.00686094	0	0	0
cwlD	B7HQY0	0	0	0	0	0	0	0	0	0	0	0	0	0.00449146	0.00386197	0.00429944	0.00878442	0.00406375	0.00788066
	B7HZK5	0.0104473	0	0.00543521	0.00591601	0	0	0.00571706	0	0	0.00503206	0.00446028	0	0	0	0.01044	0	0	0
ppsA	B7HWL1	0	0	0	0	0	0	0	0	0	0	0.00100662	0	0.00123069	0	0	0	0.0011135	0.00215936
	B7HUU6	0.0251242	0	0.045748	0.0711356	0.070013	0.0689959	0.103115	0.128406	0.13043	0.0786588	0.0804473	0.0550852	0.118026	0.146588	0.13181	0.185951	0.189843	0.195582
pabA	B7HPY1	0.0052252	0	0.0108736	0	0.00529489	0	0	0	0	0.0100671	0.0178464	0.00509171	0	0	0	0	0	0
	B7HQ76	0.0115745	0.0136513	0.0120433	0.104869	0.140747	0.115585	0.190018	0.167028	0.208306	0.0223001	0.0395323	0.0225577	0.157079	0.145454	0.127231	0.0945284	0.0874594	0.0424015
tkt2	B7HKP7	0.179152	0.192598	0.171561	0.11312	0.0947872	0.123491	0.0780827	0.0762621	0.072429	0.132872	0.139434	0.131318	0.0678578	0.0740016	0.0712941	0.0615029	0.0703808	0.0624353
	B7I0C0	0.00704926	0	0.00733475	0	0	0	0.00771511	0.00423856	0	0	0	0	0.00735894	0.0126551	0.0105665	0.043178	0.0599236	0.0710156
	B7HYQ2	0	0	0	0	0.0157234	0.015495	0.0509462	0.0373188	0.0644418	0	0	0	0	0	0	0	0.0146556	0
	B7HQ01	0	0	0	0	0	0	0	0	0	0.00373979	0.00331484	0.00378299	0.00405272	0.00348473	0	0	0	0
pyc	B7HMD1	0.136711	0.118032	0.104129	0.109293	0.0869235	0.0883376	0.0576983	0.0569499	0.0235028	0.164406	0.160984	0.150633	0.175365	0.186077	0.150009	0.20524	0.199176	0.202946
	B7HZ60	0	0	0	0	0	0	0	0	0	0.00615803	0.00545831	0.0124584	0.0133466	0.0172141	0.0191641	0.0130517	0.00603785	0.0117089
	B7HM02	0.0317769	0.0281088	0.0495957	0.0359887	0.0322007	0.0317329	0.0260838	0.0382134	0.0329934	0.099487	0.122099	0.108378	0.0746389	0.0855708	0.0873254	0.0729897	0.0675314	0.0800316
	B7HV04	0.0511106	0.037096	0.0449989	0.032653	0.0332001	0.0392614	0.022949	0.0252157	0.0163284	0.0416612	0.0537125	0.0344803	0.0328344	0.0282326	0.0196442	0.041474	0.0383725	0.0372071
	B7HKX0	0.0112911	0.013317	0.0117484	0	0	0.00563773	0	0	0	0.00543848	0.0144616	0.00550131	0	0.0101351	0.0056416	0	0	0.00517039
	B7HVG9	0.0411026	0.0308493	0.0427673	0.0126956	0.0113593	0.0149257	0.0286269	0.0314543	0.0827659	0.0143982	0.0223338	0.0291291	0.015603	0.0234784	0.022404	0.0114437	0.0211758	0.0205327
	B7HWE6	0.00541228	0.00638338	0.00563148	0.0122593	0.00822669	0.00810718	0.0266558	0.0650856	0.0861653	0	0	0	0	0	0	0	0	0
	B7HV47	0.00794282	0	0.00275484	0	0	0	0	0	0	0	0	0	0	0	0	0	0	0
	B7HND6	0.0199524	0.00784412	0.0138403	0	0	0	0	0	0	0.0192206	0.0113577	0.0129618	0.0208289	0.0179097	0.0132923	0.0203687	0.0125637	0.0121821
	B7HVY6	0	0	0.00232778	0	0	0	0	0	0	0.00215512	0.00573071	0.00654005	0	0	0	0	0	0
	B7HKT6	0	0	0.0105742	0	0	0	0	0	0	0.00978989	0.00867749	0.009903	0	0.0364888	0.0101555	0	0.0191976	0
	B7HUQ5	0	0	0	0	0	0	0	0	0	0	0	0	0	0.0117517	0	0.0534606	0.0309142	0.0239802
	B7HQ86	0	0	0	0	0	0	0	0	0	0.00232477	0.00618184	0	0	0.00433243	0.0024116	0.00246363	0.0022794	0.00442034
gap1	B7HRM2	0.0734268	0.0793846	0.117784	0.0103949	0.0155013	0.0183313	0.0167422	0	0	0.0943116	0.0862076	0.0775136	0.0574894	0.0604171	0.0489171	0.0343561	0.0404561	0.0560391
	B7HZX0	0	0	0	0	0	0	0	0	0	0.00384945	0.0068241	0.00389393	0	0	0.00399323	0.00407939	0.00377433	0.0036597
ftsX	B7HX11	0.041519	0.0285649	0.0360004	0.0352665	0.0280485	0.0310961	0.0378673	0.0208037	0.0191593	0.0333301	0.0443144	0.0438298	0.0361191	0.0248456	0.0103725	0.0247247	0.0228758	0.0285184
	B7HXB5	0.00851693	0.0100451	0.0177237	0	0.00431526	0.00425257	0	0	0	0.00410227	0.0145446	0.012449	0	0	0.00425549	0	0	0
uvrB	B7HWZ4	0.0122131	0.00900278	0.0190616	0.00864493	0.007735	0.00914716	0.00835421	0.00734347	0.00422689	0.0514726	0.0378027	0.0371909	0.0494049	0.0520731	0.0320371	0.0420793	0.0475842	0.0629168
rpmG3	B7HPP1	0	0	0	0.0439152	0.0785858	0.0387221	0.148534	0	0.0268401	0	0	0	0	0	0	0	0	0
	B7HSN1	0.0586026	0.051838	0.07622	0.033185	0.0237537	0.0409651	0.0224483	0.00704729	0.00405641	0.0931478	0.0900695	0.0828029	0.0520006	0.0578633	0.0732022	0.0628166	0.0747245	0.0831891
	B7HZ39	0	0	0	0	0	0	0	0	0	0.00347457	0.00307977	0.00351472	0	0.0032376	0	0	0.00340676	0.00330329
	B7HN21	0	0	0	0.00300935	0	0	0.0174489	0.0447354	0.0809274	0	0	0	0	0.00238513	0	0	0	0
gerQ	B7HYF2	0.0284945	0.00840177	0.0444727	0	0.00721862	0.00711376	0.0233895	0.0428327	0.00986178	0	0	0	0.0669291	0.0511545	0.0640678	0.1309	0.16821	0.156578
	B7HXE3	0.189569	0.214518	0.191916	0.646987	0.558121	0.680481	1.00934	1.13368	1.73065	0.123389	0.0437476	0.0698964	0.315566	0.160964	0.189437	0.431507	0.302453	0.258075
	B7HTF2	0.0456057	0.00896474	0.0316351	0.0086084	0.00770232	0.0227713	0	0	0	0.043933	0.0519213	0.0814744	0.0317395	0.061405	0.0379782	0.0387977	0.0430756	0.0487285
dnaN1	B7HPR8	0.0458855	0.0604854	0.0589777	0.030569	0.0218812	0.0242587	0.0206787	0.0162294	0.00747328	0.052003	0.0691411	0.0631246	0.030995	0.026651	0.0350644	0.0247992	0.0305929	0.0346077
	B7HYX5	0	0.0059616	0.00525938	0.00572463	0.00512208	0.00504767	0.00553212	0	0	0	0	0	0	0.0136115	0.00505114	0.0206405	0.0334197	0.0324047
	B7HSP3	0.0041722	0	0	0	0	0	0	0	0	0.00803834	0.0142499	0.00813122	0.00435549	0.00374506	0.00833857	0.00425925	0.00394073	0.00764209
	B7HMJ6	0.068231	0.0864343	0.102547	0.134515	0.122917	0.138797	0.157649	0.151947	0.202909	0.0559909	0.0690488	0.0615629	0.0738666	0.0771242	0.0959618	0.0593354	0.0668326	0.0856323
topB	B7HT58	0.00831259	0.00490203	0.0072077	0.00313812	0.00421172	0.0138351	0.00303259	0.00166606	0	0.0320308	0.0201105	0.0216006	0.00723147	0.0124359	0.00415339	0	0.00654285	0.0126883
mnmE	B7HZH0	0.024994	0.0241188	0.0165494	0.0102934	0.00230248	0.0136142	0.00746041	0.00546485	0.00314556	0.0372103	0.0349224	0.0354261	0.014232	0.0203956	0.0181648	0.0115979	0.0128768	0.0145666
	B7HT41	0.00489763	0	0.00509598	0.0110936	0.0148888	0.0097817	0.0160807	0.0117793	0.00678017	0.004718	0.0041819	0	0.0153384	0.00879244	0.00978843	0	0	0
	B7HYM5	0.058982	0.0993783	0.0613708	0.0763425	0.0853838	0.0757291	0.0829971	0.0607964	0.0933181	0.0243509	0.0431679	0.0574752	0.052777	0.0529436	0.0505207	0.0344072	0.0318342	0.0308673
	B7HYT3	0	0	0.00583811	0.00635455	0.0056857	0.0056031	0.00614085	0.00674738	0	0	0	0	0	0	0	0	0	0
	B7HT33	0.0534139	0.0489982	0.0679276	0.0369683	0.0420982	0.0592666	0.048716	0.0321166	0.00821611	0.128637	0.0810811	0.104099	0.0681516	0.0586	0.0474459	0.0151468	0.0252253	0.0163061
	B7HSZ7	0.0294979	0.00695811	0.0306926	0.0133631	0.00597826	0.00589141	0	0	0	0.056832	0.0453369	0.0459909	0.00615876	0.0370692	0.0117909	0.00602267	0.0167169	0.0216122
	B7HYD8	0.0510725	0.0803148	0.0177136	0.0578418	0.103507	0.119004	0.093161	0.0614174	0	0.0327995	0	0.0331785	0.017772	0.0305625	0	0	0.0321594	0
	B7HLD8	0.0244045	0.03454	0.0406287	0.0276392	0.02473	0.0365561	0.0186968	0.0117391	0.013514	0.0681774	0.066682	0.0546964	0.0560486	0.0547651	0.0536525	0.0448447	0.0484063	0.082697
	B7HUY2	0.0728962	0.057317	0.0758485	0.0825581	0.0984912	0.145591	0.097511	0.0584411	0.100916	0.06242	0.0760752	0.0868192	0.10992	0.0945146	0.0485635	0.0744171	0.0765023	0.0445073
	B7HY59	0.00109158	0.00128744	0.00567895	0.00123626	0.00221228	0.00218014	0.00238938	0.00393806	0.00151116	0.00315464	0.00186412	0.00106369	0.00113954	0.000979828	0	0.00668614	0.00721716	0.00599826
	B7HL10	0	0	0	0	0	0	0	0	0	0	0	0	0	0	0	0.0225422	0.0208565	0
	B7HYZ4	0.00308815	0	0	0	0	0	0	0	0	0	0.00263686	0	0	0.00554398	0.00308599	0	0.00291683	0.00282824
	B7HZC2	0	0	0	0	0	0	0	0	0	0	0	0	0	0	0	0.00327375	0.00302893	0
	B7HZA4	0.0249795	0	0.0129956	0	0.00421877	0.00415748	0	0.0100131	0	0.0120316	0.0177742	0.00811377	0.0217307	0.0112111	0.0166414	0.0170004	0.0235937	0.0152514
guaC	B7HZE3	0.085486	0.0709504	0.108714	0.035858	0.025667	0.0316176	0.0207913	0.00380747	0.00876628	0.0884506	0.0838071	0.0802168	0.0363576	0.0426301	0.050623	0.0355543	0.0448574	0.0434951
	B7HWK1	0	0	0	0	0	0	0	0	0	0.00485272	0.00430132	0	0	0	0	0	0	0
	B7HM15	0.00449322	0	0	0	0	0	0	0	0	0	0.00767318	0	0	0	0	0	0	0
	B7HTG2	0	0	0	0.00932168	0.016681	0.00821935	0.0180164	0.0197958	0.0113945	0	0.0210838	0.00802047	0.0429617	0.0517167	0.04935	0.0252074	0.0233224	0.045228
	B7HMZ1	0	0	0	0	0	0	0	0	0	0.00534924	0.00711212	0.00270552	0	0	0	0	0.00524484	0
	B7HLU1	0.00222114	0.0130983	0.00231109	0.0327019	0.0157553	0.0155264	0.121547	0.213683	0.347463	0	0	0	0	0	0	0	0	0
	B7HRH1	0	0	0.006394	0	0	0	0	0	0	0.0177592	0.0209884	0.0179644	0.0577357	0.0717079	0.0675492	0.05646	0.058042	0.0619071
	B7I098	0.024057	0.0109128	0.0192548	0	0	0	0	0	0.00256184	0.0445666	0.0489832	0.0378684	0	0.00332216	0.00369849	0	0	0
minD	B7HQK6	0.0868261	0.0744762	0.106768	0.0670461	0.0639884	0.043353	0.0388748	0.0379684	0.0327818	0.0608302	0.0876171	0.0653788	0.0370802	0.0460537	0.0433827	0.0201449	0.0223661	0.0361447
	B7HQE0	0.00967249	0.00760531	0.013419	0	0	0	0	0	0	0.00310591	0.00550598	0.00314179	0	0	0	0	0	0
fliG	B7HLU8	0.00897726	0.010588	0.00622723	0	0	0	0	0	0	0	0.0102205	0	0	0	0	0	0	0
	B7HQ44	0	0	0	0	0	0	0	0	0	0	0	0	0	0	0	0.117576	0.114827	0.0996195
	B7HU16	0.00268209	0	0.00279072	0	0	0	0	0	0	0	0	0	0	0	0	0	0	0
	B7HR07	0.011592	0	0.00804096	0.00437613	0	0.00385864	0.00422897	0.00464666	0	0.00372227	0.00659863	0.00376527	0	0	0.00386129	0.00788922	0.00364962	0.00707755
yycG	B7HZF2	0.00328131	0	0.00682841	0.00371623	0.00498761	0.00327677	0.00179563	0.00394596	0	0.00474144	0.00560358	0.00959245	0.00171273	0.00441807	0	0.00837444	0.00464891	0.00901543
yycF	B7HZF3	0.0511122	0.0452122	0.0487504	0.0337673	0.0431616	0.0297742	0.02797	0.0256105	0.0235862	0.0574438	0.0618273	0.0415053	0.0489112	0.0649959	0.0595893	0.039134	0.0402305	0.0507112
nagA2	B7HN33	0.0137789	0.0227517	0.0172044	0.00936315	0.00279254	0.0110079	0.00301609	0.00662798	0	0.0159283	0.0329429	0.0268539	0	0.00247366	0.00550773	0.00281329	0.0104116	0.00252385
purK	B7HS27	0.0324749	0.0542608	0.0591327	0.0153247	0.0191963	0.0243225	0.0148093	0.00325441	0.00749292	0.0573537	0.0508367	0.050105	0.0141257	0.0218627	0.0162261	0.0138135	0.00255611	0.00743542
	B7HU83	0.0783989	0.0406849	0.140307	0.00710321	0.0301889	0.0516716	0.114978	0.154618	0.134582	0	0	0	0.278266	0.301195	0.200561	0.782739	0.813063	0.779753
	B7HXR4	0	0	0	0	0	0	0	0	0	0.0120415	0.0160099	0.00609033	0.0260983	0.0448811	0.0312282	0.0382824	0.0472261	0.0457918
potD	B7I0J5	0.0374043	0.0339351	0.041913	0.0130345	0.0145781	0.0143664	0.0157452	0.00346006	0.00398321	0.0166304	0.0147407	0.0140187	0.00600732	0.00774807	0.00862575	0.0264356	0.0326116	0.028986
	B7I0B0	0.00519863	0.00613139	0.0108183	0	0.00526796	0.00519143	0	0	0	0.0100159	0.00887783	0.0151974	0.00542701	0.0046664	0.005195	0	0	0.00476109
ylbF	B7HMB5	0	0	0.00723402	0	0	0	0	0	0	0.0133949	0.0237457	0.0135497	0.0217736	0.0249627	0.0208428	0.014195	0.0131335	0.0191019
	B7HPE8	0	0	0.0147167	0	0.028665	0	0.0154799	0.0340176	0	0.0136251	0	0.0137825	0.0147652	0.0634792	0	0.0288779	0.066796	0.0777207
zwf	B7HYW8	0	0	0	0	0	0	0	0	0	0	0.0017144	0	0	0	0	0	0.00189643	0
malR	B7HMY4	0.0183567	0.00360839	0.0127334	0.00692992	0.00620051	0.00305522	0.00334844	0.00735831	0.00847087	0.011789	0.00783705	0.00894387	0.00319386	0.00549246	0	0.00312328	0.00288972	0
bfmbAa	B7HNS5	0.0374674	0.036825	0.048731	0.0247529	0.0189836	0.0311796	0.017086	0.00750944	0.00432242	0.0631631	0.06665	0.0730204	0.0260756	0.022421	0.0187206	0.0159371	0.0235925	0.028595
	B7HV39	0.065951	0.0583382	0.0629035	0	0.00278461	0.00274416	0.0270677	0.0165229	0.0228253	0.00264717	0.00469276	0.00267776	0	0.00493326	0.00274604	0	0.00259551	0.00503336
dapG2	B7HLD3	0.059662	0.0489509	0.0485831	0.0235026	0.0289146	0.0388562	0.0227122	0.0155972	0.0143643	0.0499772	0.055373	0.0556101	0.0487433	0.0395834	0.0518438	0.0476663	0.0588022	0.0641434
	B7HV05	0	0	0	0	0	0	0	0	0	0	0	0	0	0	0	0.0254707	0.0235659	0.0228502
recQ2	B7HUC5	0	0	0	0	0	0	0	0	0	0.0013764	0.00244001	0.00278461	0	0.00128253	0	0	0	0
	B7HQN8	0.0243117	0.00573475	0.0354148	0	0.00985436	0.0194224	0.0106432	0	0	0.00468399	0.0290623	0.0189524	0.0152278	0.0174581	0.0291536	0.0198551	0.0183703	0.0311717
acsA	B7HSJ9	0.0481482	0.0336517	0.0593756	0.0585692	0.0415621	0.0498624	0.0448893	0.0364561	0.0296246	0.103072	0.0989732	0.095574	0.0986652	0.108848	0.0944472	0.0801008	0.0926384	0.124122
proV1	B7HQ73	0	0	0	0	0	0	0	0	0	0	0.00822087	0	0	0	0.00320705	0	0.00303124	0.00293918
hom1	B7HNB5	0.00726185	0.00285493	0.0100746	0.00548291	0.0049058	0.00966906	0.00794778	0	0	0.00932734	0.00620062	0.00235878	0.00758087	0.00651839	0.00483785	0.00494224	0.00457265	0.00665066
etfA	B7HRG5	0.150309	0.130004	0.170298	0.166449	0.13539	0.126752	0.146228	0.144604	0.134099	0.350728	0.407847	0.338506	0.226651	0.233863	0.240327	0.156855	0.129351	0.183545
	B7HLH1	0.0172119	0.00812008	0.017909	0.00779731	0.0034883	0.00343762	0.00376755	0.00413966	0.00476556	0.0464258	0.0470292	0.0570256	0.0215617	0.0370796	0.0309599	0.0140569	0.00975424	0.018916
	B7HQ49	0.0254215	0.0074957	0.0330639	0.00719775	0.0128803	0.00951988	0.0104335	0.011464	0.0439912	0.00612228	0.0135666	0.00619302	0	0	0	0	0	0
typA	B7HME1	0.121348	0.133318	0.112425	0.0771877	0.0673788	0.0763599	0.0418442	0.0419791	0.027615	0.269024	0.232778	0.213818	0.150973	0.134291	0.121263	0.0916371	0.0753638	0.100478
	B7HLV7	0.0135989	0.0200487	0.0141497	0.0077007	0.0103352	0.0135801	0.00372086	0.00817674	0.00470652	0.0131002	0.00870872	0.00993864	0	0.00305168	0.00339736	0	0	0.0031136
sspB	B7HSI3	0.0672478	0.0793137	0.0874641	0.0571208	0.0851808	0.050366	0.0735998	0.0606518	0.0465481	0.0161953	0	0.0163824	0.193056	0.165998	0.134402	1.08125	1.06391	0.939215
	B7HT34	0.024037	0	0.00833683	0.0181486	0.0243576	0.032005	0.00876915	0.00963527	0	0.0385923	0.0273657	0.0156153	0.0501859	0.0503443	0.0560472	0.0408975	0.00756782	0.0220139
	B7HX88	0.00486016	0	0.00505699	0	0	0	0	0	0	0.0140457	0.0248994	0.014208	0.0202947	0.0218129	0.0145703	0.0248078	0.0275431	0.0267066
	B7HPQ9	0	0	0	0	0	0	0	0	0	0	0.00482009	0	0	0.00506712	0	0	0	0
	B7HT62	0.0549372	0.0308544	0.0626062	0.0118512	0.0212076	0.0261244	0.017179	0.00314595	0.00362161	0.00504022	0.00893502	0.00509845	0	0.00234823	0	0	0	0
kynA	B7HTI7	0.00350155	0	0.00728672	0	0	0	0	0	0	0	0.00298984	0.00682419	0	0	0.00349911	0	0	0
	B7HVG2	0.119112	0.118088	0.147286	0.089933	0.0682221	0.081022	0.0510116	0.0622777	0.0645245	0.189576	0.181301	0.179991	0.106324	0.111566	0.0931531	0.105737	0.125548	0.156516
	B7HS13	0	0	0	0	0	0	0	0	0	0	0	0	0	0.00308017	0	0.00350307	0	0.00628534
	B7HXS6	0.00291852	0	0.00607344	0.00330535	0.00295744	0	0.00638839	0	0	0	0.00498403	0.00568792	0.00304673	0.0104789	0.00874945	0.00595883	0.00551321	0.00801865
ptsH1	B7HN27	0.399953	0.633867	0.208076	0.721913	0.848571	0.673987	0.77971	0.82666	0.865135	0.0963211	0.0533602	0.0852547	0.260952	0.224379	0.224817	0.318983	0.236103	0.160253
	B7HRK8	0.00491485	0	0	0	0	0	0	0	0	0	0	0	0	0	0	0.0150522	0.00464218	0.00900239
	B7HR49	0.0395765	0.0933551	0.0274529	0.134466	0.240626	0.197609	0.187698	0.0951859	0.109578	0.0127083	0	0.0128552	0.0275435	0.0236832	0	0	0	0
qcrA	B7HL32	0	0	0.00741892	0	0.00722524	0.00712028	0.00780364	0	0	0.00686863	0.036529	0.020844	0.0893206	0.0768021	0.0641266	0.0655102	0.0875496	0.117541
mmgD	B7HR26	0.0108371	0.00639075	0.0225519	0.00306836	0.0027454	0.00270552	0.00593035	0	0	0.0548078	0.0416401	0.0237605	0.0339394	0.0486379	0.0514401	0.0193606	0.0204717	0.0198499
	B7HSG4	0.00358919	0	0.00373455	0	0	0	0	0	0	0.0103726	0.00306468	0.0104925	0.00374687	0	0	0.0109922	0.00339007	0
	B7HPN5	0	0	0	0	0	0	0	0	0	0	0.00992702	0	0	0.00521788	0.00580895	0	0	0
spoVS2	B7HLB0	0.0905674	0.152596	0.12116	0.410286	0.327769	0.284246	0.396488	0.388972	0.39405	0.261737	0.220949	0.226938	0.405198	0.406476	0.349088	0.369828	0.342172	0.236985
	B7HM43	0.0290641	0.00685578	0.0483859	0	0.0117807	0.0232191	0.0572569	0.0629121	0.0724242	0	0	0	0.0788863	0.104354	0.0929401	0.166155	0.16471	0.13309
thiD1	B7HWF6	0.071874	0.0706416	0.0830943	0.0452225	0.0404625	0.0518372	0.052442	0.0384144	0.0331669	0.0384655	0.0409137	0.0389099	0.0208421	0.0286736	0.0279315	0.0122289	0.0113144	0.0146277
	B7HXP0	0.0069393	0.00818438	0.0144407	0.00392953	0.00351592	0.00346485	0.00379738	0.00417245	0.00480331	0.016712	0.0177756	0.0169051	0.00362208	0.00934331	0.0104017	0	0.00327716	0.00635526
	B7HXZ6	0.0134073	0.00527097	0.0232505	0.0607375	0.0362297	0.0357034	0.0831511	0.0859895	0.0494954	0.0430519	0.0648721	0.0174197	0.261265	0.252729	0.214367	0.109496	0.101308	0.118696
dbpA	B7HZE2	0.00211792	0.00249792	0.00220369	0	0	0	0	0	0	0.0122414	0.0126589	0.00825524	0.00442192	0.00380218	0	0.00216211	0.00200042	0.00387933
	B7HVA2	0.0205186	0.00537781	0.0284661	0.0103281	0.0115512	0.0136601	0.0174663	0.0109665	0.00631233	0.0329434	0.0369868	0.0311024	0.02856	0.0286501	0.0455651	0.0232741	0.0258404	0.0271435
	B7HLT0	0.0342491	0.0302957	0.0356362	0.0387886	0.0607353	0.059853	0.0562263	0.0617797	0.0355603	0	0	0	0	0	0	0	0	0
secY1	B7HTH1	0	0	0	0	0	0	0	0	0	0.00463	0	0	0.00752614	0	0	0	0	0
ctsR	B7HQR2	0	0	0	0.00735366	0.00657965	0.00648406	0	0.00780825	0	0	0	0	0.0135566	0.0233132	0.012977	0.00662853	0.0183985	0.0118931
	B7HYT2	0	0	0	0	0	0	0	0	0	0	0.00530522	0	0	0	0	0	0.00586851	0.00569027
	B7HZQ0	0.0920376	0.0868411	0.0909768	0.333557	0.298448	0.294113	0.488546	0.509129	0.51603	0.0398979	0.0392937	0.0358745	0.230594	0.194145	0.280519	0.192614	0.134744	0.160153
secY	B7HQW4	0.00483039	0	0.00502602	0	0	0	0.00264333	0	0	0.00697984	0	0.0117675	0.00504259	0.00867173	0.00482702	0.0123279	0.0182496	0.0176954
	B7HS62	0	0	0	0	0	0	0	0	0	0	0	0	0.00311686	0	0	0.00609597	0.00282005	0.0027344
	B7HY82	0.0569025	0.0488089	0.0753545	0.0644446	0.0681453	0.051658	0.0736005	0.0684284	0.0572906	0.13953	0.136927	0.131061	0.151206	0.162518	0.175758	0.126741	0.151465	0.142127
	B7HML3	0	0	0.0061623	0	0	0	0	0	0	0.00570523	0.0151709	0.00577114	0.0123653	0.0106322	0.00591831	0.00604602	0.0111878	0.010848
	B7HZR6	0	0	0	0	0	0	0	0	0	0	0	0	0	0.00960144	0	0	0.0101031	0.00979627
	B7HQI9	0.0109704	0.00323468	0.0142683	0.00310611	0.00555834	0.00821639	0.00300165	0	0	0.01321	0.0163926	0.0106901	0.00572616	0.00492363	0.00548136	0.00279982	0.00259044	0.0075353
	B7HYH4	0	0.0110919	0	0	0	0	0	0	0.0260388	0	0	0	0	0	0	0	0	0
ldh	B7HTY2	0.0564664	0.0313402	0.00345608	0	0.00336585	0.00331696	0	0	0	0.0223981	0.0198531	0.0032367	0	0.0029815	0	0.00339086	0.00313728	0.003042
	B7HZJ6	0.0485574	0.0286349	0.0631549	0.0206225	0.0307531	0.0545514	0.026572	0.0364956	0.0420136	0.0409294	0.062192	0.0473169	0.0506906	0.0762758	0.0303272	0.0557668	0.0458635	0.061147
	B7HL91	0	0	0.00679102	0.00739176	0.0132275	0.00651766	0.0142864	0.0078487	0.0090354	0.00628731	0.0055729	0	0.00681342	0.0058585	0.00652214	0.00666287	0.0123292	0.00597738
	B7HQF6	0.0294795	0.0347688	0.0536784	0.0333868	0.0298726	0.0588773	0.048396	0.0177253	0.0204054	0.0567965	0.0566357	0.0502711	0.0384682	0.0661536	0.0368236	0.0376182	0.034805	0.0269984
	B7HWQ3	0	0	0	0	0	0	0	0	0	0	0	0	0	0.00164639	0	0	0.00173242	0.0033596
	B7HVA7	0	0	0.0111235	0.0242151	0.0108331	0.0106758	0.0117004	0	0	0	0.00912827	0	0	0.00959609	0.0106831	0.0218272	0	0
purN	B7HS35	0.032214	0.018997	0.0335187	0.00608063	0	0	0	0	0	0.0413767	0.0366751	0.0209274	0	0	0	0	0	0
	B7HKQ3	0.062792	0.0592468	0.0392011	0.0142229	0.0636295	0.0501641	0.0274893	0.0302043	0.0173856	0.0241956	0.0428926	0.0122376	0.0262202	0.0338181	0.0250993	0.089743	0.0711702	0.0460057
	B7HYJ3	0	0	0	0	0	0	0	0	0	0.00243764	0.00432131	0.0049316	0	0.00227139	0.00252868	0	0	0.00231747
	B7HKJ9	0	0	0	0	0	0	0	0	0	0	0	0	0	0	0	0.0155496	0.0172641	0.0111598
	B7HUF8	0	0	0	0	0	0	0	0	0	0	0	0	0	0	0	0.0121033	0.0223964	0.0190017
	B7HV64	0	0	0.00332942	0	0	0	0	0	0	0	0.00136611	0.00311808	0	0	0	0	0	0
	B7HYP7	0.0492641	0.0613313	0.0569548	0.133285	0.108162	0.0956588	0.140784	0.134942	0.162923	0.00790954	0.0070108	0.0106679	0.0114285	0.00982679	0.0164099	0.005588	0.0129253	0.00250655
	B7HPW8	0.0111162	0.0131107	0.0231328	0.0503583	0.0450578	0.0222016	0.0364986	0.0133678	0.061556	0.0535424	0.0474585	0.0433288	0.0812318	0.0798251	0.0777591	0.0226963	0.020999	0.0407224
	B7HZ18	0.00641472	0	0.00667452	0.00726495	0.0195008	0.00640584	0.00702064	0.0154281	0.0088804	0.0123589	0.0273865	0.0250034	0.0267861	0.051822	0.0448717	0.0327428	0.0363531	0.0411238
	B7HR56	0	0	0	0	0	0	0	0	0	0	0	0	0	0.0024325	0.00270805	0.00829945	0.0051192	0.00496372
dps2	B7HVX5	0.074648	0.0560265	0.0917933	0.192141	0.213177	0.203304	0.28966	0.465163	0.394575	0.0653728	0.115889	0.0595153	0.0850117	0.0670057	0.0745959	0.103917	0.115375	0.118086
rpoC	B7HQT7	0.209197	0.138976	0.134156	0.132485	0.106426	0.108291	0.071958	0.0503142	0.0271877	0.197412	0.193937	0.191372	0.189864	0.181649	0.151029	0.158646	0.14275	0.132158
	B7HZF7	0	0	0.00160733	0	0	0	0	0	0	0.00148811	0.00131902	0.0030106	0	0.00138661	0	0.00157699	0.00145906	0.0028295
	B7HRL0	0.0522031	0.0478874	0.0633702	0.0361303	0.0470216	0.03765	0.028567	0.0244133	0.0160597	0.069845	0.0742904	0.0536955	0.078717	0.0520651	0.07825	0.0680957	0.0931353	0.0903067
	B7HUX4	0.0960293	0.0770163	0.119902	0.0913562	0.0700632	0.0882246	0.0798759	0.0646691	0.042541	0.0296023	0.0459177	0.0262013	0.0360893	0.0517188	0.0460619	0.0823476	0.0943298	0.105536
	B7HTZ7	0.12667	0.123416	0.140396	0.109154	0.111617	0.120995	0.0843867	0.0629181	0.0381217	0.12733	0.126969	0.112701	0.0862404	0.0914561	0.101816	0.087146	0.109239	0.146273
	B7HSQ3	0.00607092	0	0	0	0	0	0	0	0	0.00584826	0.0207349	0.00591582	0.0697139	0.0708421	0.0424668	0.0433831	0.0286706	0.0277998
	B7I078	0.00234475	0	0.00243971	0	0	0.00468301	0.00256623	0	0	0.00677625	0.00800837	0.00913939	0	0.0021047	0.00234311	0	0	0
	B7I070	0	0	0	0.00682745	0	0.00301004	0.0131957	0.0688703	0.179431	0	0	0	0	0	0	0	0	0
	B7HKM1	0.0913644	0.107757	0.102521	0.200862	0.185166	0.200366	0.23136	0.247748	0.282726	0.00172575	0.00152966	0.00349138	0.0093508	0.00964832	0.0161119	0.0219461	0.0253811	0.0344543
qoxB	B7HWC3	0	0	0	0	0	0	0	0	0	0	0.00539188	0.00307668	0.00164803	0.00141705	0	0.00161161	0.00447327	0.00722902
pyrH	B7HMH8	0	0	0	0	0	0	0	0	0	0.00406324	0.0108046	0	0.017613	0.0265028	0.03372	0.0387535	0.0438233	0.0463553
pdhD	B7HMT9	0.287892	0.298473	0.31163	0.189319	0.164687	0.176206	0.160084	0.111679	0.0867813	0.306408	0.285469	0.271488	0.186625	0.160469	0.157766	0.168281	0.18859	0.167978
	B7HX67	0	0.00368838	0.0178966	0.0194797	0.0158449	0.0171762	0.104391	0.144788	0.216466	0.00602514	0.0133513	0.0121895	0	0.00421066	0	0	0.00443067	0.00286407
hisC	B7HL28	0.0661624	0.0747822	0.0917893	0.0842983	0.083806	0.0798356	0.0844806	0.0629881	0.0457969	0.111538	0.101218	0.0940219	0.112237	0.116303	0.104684	0.0844286	0.0703034	0.0959404
	B7HUI7	0.0952037	0.101057	0.0792475	0.161734	0.192947	0.228173	0.218812	0.251873	0.276775	0.0275136	0.0406454	0.0371086	0.129202	0.11964	0.15222	0.145785	0.0989142	0.09591
ahpF	B7HT23	0.234417	0.25426	0.291822	0.329489	0.284204	0.330238	0.247396	0.241628	0.168056	0.258079	0.278794	0.254942	0.190091	0.185994	0.167324	0.170934	0.164082	0.185935
coaBC	B7HLK2	0	0.00307912	0	0	0	0	0.00285729	0	0	0.00251494	0.00445835	0	0	0.00234342	0	0	0.00246586	0
	B7HPG8	0	0	0	0	0	0	0	0	0	0	0.00753969	0.00430225	0.004609	0.00396304	0.00441197	0	0	0.00404346
	B7HMA3	0.0034259	0.00808118	0	0.00387998	0	0.00342116	0	0	0	0	0	0.00333838	0	0	0.00342351	0	0.00323584	0
trmU	B7HQF4	0.0191948	0.0129365	0.0570634	0.0155278	0.0222295	0.0246449	0.0180068	0.0131902	0.00379612	0.029057	0.0374622	0.0347368	0.00572516	0.0172297	0.0191814	0.00839799	0.0207199	0.0226019
	B7HMD7	0	0	0	0.0077188	0.00690635	0.00680602	0.0149184	0.00819596	0.00943517	0.00656548	0.00581946	0.0132827	0.0355743	0.0122354	0.0136214	0.020873	0.0257494	0.0187255
	B7HVP2	0	0	0	0	0	0	0	0	0	0.00664692	0.00589164	0.00672371	0.00900389	0.00774198	0.0120666	0.00528297	0.00651719	0.0110587
	B7HQR9	0.0119822	0.0094214	0.0124675	0.00904691	0.00809467	0.00797707	0.00437133	0.0144092	0.00552929	0.00769515	0.0204623	0.0155681	0.0166781	0.021511	0.0199564	0.0122322	0.0264074	0.0146316
	B7HNJ6	0	0	0	0	0	0	0	0	0	0.00584104	0	0	0.0126596	0.00544267	0.0060592	0.0123799	0	0.0222124
	B7HZI9	0.00557415	0	0	0	0	0.00556643	0	0	0	0.0053697	0.0142787	0.0162952	0.0290951	0.010007	0.022281	0.0227618	0.0157947	0.02042
	B7I002	0.0303238	0.0204369	0.0225371	0.0245307	0.0131692	0.0346078	0.00948231	0.0104189	0.0119942	0.0584232	0.0554837	0.0759834	0.031656	0.0311078	0.0519474	0.0176894	0.0204582	0.0198369
	B7HV08	0.011748	0.0277117	0	0.0133051	0.035714	0.0234634	0.0128577	0.0282552	0.0325273	0	0.0200623	0.0114479	0.0245282	0.0210905	0.0117398	0.0239862	0.0332887	0
	B7HQY9	0.00428687	0.00252802	0.00446049	0.00242753	0.00217202	0	0.0046918	0.0077328	0.0118693	0.00412964	0.0073208	0.00208868	0	0	0.00214194	0.00656447	0.00607357	0.00981517
	B7HN01	0	0	0	0	0	0	0	0	0	0	0	0	0.00703297	0	0.0134646	0	0.00636325	0.00616999
ftsA	B7HM28	0.0552853	0.0481949	0.0525222	0.0517238	0.0487153	0.0552088	0.0499843	0.0433589	0.0299488	0.0625198	0.0697828	0.0608998	0.0602233	0.0474677	0.0528447	0.0466233	0.031785	0.033021
	B7HK64	0.0058997	0	0.00613864	0	0	0	0	0	0	0.00568332	0.00503754	0.00574898	0	0.0052957	0	0	0	0
	B7HSR7	0.148314	0.198248	0.123456	0.324745	0.450875	0.35546	0.476147	0.475614	0.451709	0.0380997	0.0337706	0.0481749	0.185795	0.15088	0.167972	0.191784	0.121408	0.144886
galE1	B7HX97	0.0031122	0.0036706	0.00971472	0.0035247	0.00630741	0	0.00340616	0.00748518	0	0.00899415	0.00265739	0.00606538	0	0.00279358	0.00311003	0	0.00587908	0.00570052
	B7HRR6	0.00406337	0	0	0	0	0.00405775	0	0	0	0.011743	0.00693912	0.0118787	0.00848376	0.0145895	0.0121816	0.00829631	0.0115138	0.00744276
	B7HKU8	0	0	0	0	0	0	0	0.0476787	0.0686094	0.00954841	0.00846344	0	0.051737	0.0355887	0.0396201	0.0303563	0.0187241	0.0272332
azoR	B7HZ94	0	0	0	0	0	0	0	0	0	0	0.00859024	0.00980343	0	0	0	0	0	0
thrS	B7HR64	0.0015612	0.00184131	0.00324885	0	0	0.00155903	0.00170866	0	0	0.00601574	0.00533219	0.00760656	0.00162978	0	0	0.00159377	0.00147458	0.0028596
amhX	B7HT21	0.00834202	0.00327959	0.00289329	0.00314923	0.00281776	0.00555365	0.00304333	0.00334391	0.0038495	0.00267868	0.0118716	0.00270963	0.00290283	0.00249599	0	0.00567738	0.00525281	0.00254664
	B7HTU2	0.00406436	0	0.00845793	0	0	0.00405873	0.00444827	0	0	0.00391529	0.0138816	0.00396052	0	0	0	0	0.00383888	0.00372228
	B7HWK4	0.0238069	0.0340953	0.0371566	0.06548	0.0568647	0.0764163	0.0911947	0.104292	0.110644	0.00163812	0.0101639	0.0099423	0.00710079	0.0106848	0.0118952	0	0.00481846	0.00467212
	B7HPM8	0.00394044	0	0.00820006	0.0312391	0.023958	0.01574	0.0258759	0.0331702	0.0327304	0.00759184	0	0.0115193	0.0123407	0.00707406	0.0157508	0.00402266	0	0.0144352
	B7HVE3	0.00912448	0	0.00316468	0	0	0	0	0	0	0.0292994	0.0259702	0.0237103	0.00635022	0.00819034	0.00607875	0.00620991	0.00287276	0.0139275
	B7HXX5	0	0	0	0	0	0	0	0.00436687	0.0100543	0	0	0	0	0	0	0	0	0
	B7HP97	0.00628715	0	0.00654178	0	0.0031855	0	0.00344051	0	0	0.0121131	0.0187893	0.0122531	0.00328168	0.00846523	0.00942415	0	0.00593835	0.005758
	B7HS52	0.00509347	0.00600737	0.0158993	0.00576858	0.0103228	0.0101729	0.00557459	0.00612518	0.00705129	0.01472	0.0130474	0.0148901	0.0106345	0.013716	0.0101798	0	0.0048109	0.00932957
	B7HQD5	0.00474433	0	0.00987294	0.00537316	0.0096152	0.0142133	0.0103849	0.00570531	0	0.00457032	0.012153	0	0	0.00851722	0.00474102	0	0.00448112	0
	B7HNJ3	0	0	0	0	0	0	0	0	0	0.00302336	0.00267983	0	0	0	0	0.00320396	0.00296436	0.00862298
	B7HRU4	0.0649245	0.0425408	0.0525419	0.0735298	0.0804104	0.0792423	0.0828999	0.0824128	0.0948733	0.121612	0.0954741	0.119502	0.10543	0.116555	0.144176	0.08469	0.112425	0.105707
	B7HM17	0	0	0.00474567	0	0	0	0	0	0	0	0	0	0.00476132	0.012282	0.00455777	0.0512173	0.0646188	0.0626562
	B7HKW9	0.0157881	0.0186209	0	0	0.0319973	0	0.0172794	0.0379721	0.0218567	0	0	0	0	0.0141717	0	0	0	0
moeA3	B7HSR0	0	0	0	0	0	0	0	0	0	0.00949785	0.00210466	0.00960758	0.00257315	0	0.00246315	0	0.00232812	0
argS	B7HQ02	0	0.00209773	0.00370128	0	0	0.00355229	0	0	0	0.0068535	0.00759344	0.00693268	0	0.00319304	0	0	0	0.00814457
	B7HKP6	0	0	0	0	0	0	0	0	0	0	0	0	0	0.0176756	0	0	0	0
	B7HLA9	0	0	0	0	0	0	0	0.0039133	0	0	0	0	0.00339711	0	0.00325188	0	0.00614724	0.0119211
	B7HS89	0	0	0.00636971	0	0	0	0	0	0	0	0	0	0	0.00549504	0	0	0	0
gltX	B7HQS2	0.0949131	0.0851739	0.107345	0.0724411	0.0627254	0.074177	0.0519392	0.0347377	0.0257078	0.131185	0.128611	0.116616	0.0775431	0.0777878	0.0762899	0.0674041	0.0779544	0.0850352
	B7HWE7	0.0723893	0.0552444	0.0664598	0.0482259	0.0474649	0.0680369	0.0605854	0.0307243	0.0176849	0.0656323	0.0690824	0.0746894	0.0577884	0.0573338	0.0723388	0.0260823	0.0402196	0.0428979
	B7HX10	0.00656196	0.00515956	0.0273109	0.00743171	0.00443298	0.00436858	0.00239393	0.0131519	0.0242246	0.0273922	0.0336181	0.0127886	0.0502351	0.0726453	0.0590164	0.0960172	0.119826	0.120194
	B7HNI4	0	0	0.00379393	0.00206477	0	0	0.011972	0.0153469	0.0100956	0	0.00778351	0	0.00380644	0.0081824	0.00182186	0.022334	0.0275518	0.0500906
	B7HTG4	0.00563508	0	0.0058633	0	0	0	0	0.00677649	0	0.0108568	0.00962317	0.00549112	0.00588264	0.0101163	0.0112623	0.00575265	0.00532246	0.0154824
	B7HLU0	0	0.00424287	0	0.0244453	0.0145815	0.00359242	0.0472464	0.0778694	0.154385	0	0	0	0	0	0	0	0	0
	B7HQM8	0.0161034	0.00949639	0.0167556	0.00911892	0.0163182	0.00804057	0.00881225	0.00968263	0	0.038782	0.0137501	0.0470761	0.0588381	0.0505918	0.0402305	0.057538	0.0836553	0.0516183
	B7I053	0.0627009	0.110927	0.0543669	0.189364	0.243559	0.21915	0.240182	0.226204	0.18807	0.080535	0.071384	0.0814655	0.152729	0.131324	0.156643	0.149355	0.148056	0.114848
	B7HL96	0.00354218	0	0.0110569	0	0	0	0	0	0	0.0204736	0.0211717	0.0138067	0.00369779	0.00317954	0.00353971	0	0.00334567	0.00324405
	B7HRF8	0	0	0	0	0	0	0	0	0	0.0128338	0.0113755	0.012982	0.0208615	0.0478339	0.0399393	0.0340009	0.0314582	0.0305028
	B7HZT7	0.0174477	0.0164626	0.0290469	0.0118562	0.0106082	0.0139389	0.0114575	0.0125891	0.00483084	0.0268924	0.065551	0.0238028	0.0182142	0.0156615	0.0139484	0.0249365	0.0197757	0.0319585
	B7HXN3	0	0	0	0	0	0	0	0	0	0.00188146	0	0	0	0	0	0.00199384	0.00184474	0
	B7HYE5	0.00859835	0	0.00894659	0	0	0.00858645	0.0282316	0.04136	0.0297584	0	0	0	0.0583446	0.0540265	0.0558503	0.0175555	0.036546	0.0157494
gabD	B7HSY7	0.004387	0.00258707	0.00456467	0.00248423	0.00222275	0.00219046	0.00240069	0	0	0.00633914	0.0112377	0.00641238	0.00228986	0.0059068	0.00219197	0	0.00207181	0.00803554
	B7HWW4	0	0	0.00803673	0	0.0156538	0	0.00845348	0	0	0	0	0	0	0.00693315	0	0	0	0
	B7I044	0	0	0	0	0	0	0	0	0	0.00575053	0.00509711	0.00581697	0	0.00267917	0.00596531	0.0121881	0.0112766	0.00820059
menF	B7HTW8	0	0.00260593	0.00229898	0	0	0	0	0	0	0.00212846	0.00377321	0	0	0	0	0	0	0
	B7HMW5	0	0	0	0	0	0	0	0	0	0	0	0	0	0	0	0.0688664	0.0509731	0.0370687
	B7HND9	0.0324244	0.0254948	0	0.0244814	0.0109523	0.0215863	0.011829	0.0129974	0.0149625	0.0104117	0.027686	0.042128	0.0338488	0.0485081	0.0216012	0.0220673	0.020417	0.0197969
	B7HR37	0.011435	0.00674338	0.00594907	0.00647533	0.00579377	0.004758	0.00312879	0.00343781	0	0.0220312	0.0235962	0.0167143	0.00994782	0.0171072	0.00666578	0.00680961	0.00720042	0.0104726
	B7HNT3	0.0415894	0.0981032	0.0216369	0.0471019	0.147504	0.124596	0.0455179	0.0500136	0.0287877	0	0	0	0	0	0	0.0849144	0	0.0190446
	B7HMA6	0.00614221	0	0.0127819	0	0	0	0	0	0.00425157	0.00887539	0.0183561	0.00598529	0.00320602	0.0110268	0.00613792	0	0.00870218	0.00562525
rsgA	B7HNG3	0.00865018	0.0170037	0.0210012	0.0261245	0.0204529	0.028794	0.0157787	0.0208046	0.0119751	0.0111105	0.0172341	0.00561946	0.0180604	0.0155292	0.0115255	0.0176613	0.019064	0.0237664
	B7HT42	0	0	0	0	0	0	0	0	0	0	0	0	0	0	0	0.0309898	0.0547381	0.055603
	B7HM62	0	0	0.000664245	0	0	0	0	0.0007677	0	0	0	0	0	0	0	0	0	0
fabH	B7HZV0	0.0480245	0.0323665	0.0392618	0.0233099	0.0208564	0.0137023	0.022526	0.0123755	0.00949772	0.0429586	0.0439354	0.0267415	0.0286482	0.0246331	0.0205676	0.0175095	0.0226801	0.0157081
prpB	B7HR28	0.059183	0.024636	0.083314	0.00788557	0.0105834	0.0104296	0.0228612	0.0125596	0.00481951	0.0771344	0.0624246	0.0712407	0.0581487	0.053124	0.0660996	0.0319859	0.0328822	0.0446369
	B7HNL4	0.00363943	0	0.00757366	0	0	0	0	0	0	0.0350595	0.0279682	0.0319181	0.00379932	0.0163342	0.0145476	0	0.00343753	0.00333312
	B7HXZ4	0	0	0	0	0	0	0	0.0131624	0	0	0	0	0	0.0196496	0.0218754	0.0558686	0.0620287	0.0601448
	B7HW01	0	0	0	0.011617	0.00519713	0	0.0224527	0.0863461	0.113602	0	0	0	0	0	0	0	0	0
	B7HKX6	0	0	0	0.0135609	0.00606678	0.00597865	0	0.0215989	0.00828818	0	0.00511202	0	0.0187498	0.00537401	0.0119655	0.00611185	0.0169644	0.00548305
	B7HLJ0	0.0611504	0.0309096	0.063627	0.0494682	0.061966	0.0697895	0.0478046	0.0630315	0.0362808	0.0504922	0.096969	0.085126	0.0729564	0.117621	0.122216	0.0802624	0.107265	0.0720048
	B7HVN6	0	0	0	0	0	0	0	0	0	0	0	0	0.0113577	0.0175786	0.0108721	0.0199921	0.0390493	0.0338777
	B7HZF1	0	0.00272237	0.0048034	0.00261416	0	0.00230503	0	0.00277576	0.0063909	0.00444712	0.00591271	0.00224925	0	0.00414382	0	0.00235638	0.00218016	0.00634185
	B7HN62	0	0	0	0	0	0	0	0	0	0	0	0	0	0	0	0.0428899	0.0352734	0.0299268
	B7HNR2	0	0	0.0109775	0.0119486	0.00534545	0	0.00577337	0.0063436	0	0.0558979	0.0585548	0.0411227	0.0440547	0.0473505	0.0527142	0.0376961	0.044842	0.0483113
	B7HNE0	0	0	0	0	0	0	0	0	0	0	0	0	0.017625	0.0242477	0.0134972	0.0551537	0.0510292	0.0494794
	B7HN98	0.00328811	0	0.00342128	0	0	0	0	0	0	0.00633502	0.00842278	0.00640821	0.00343256	0.00295148	0.00328581	0.00335671	0	0
	B7HSI2	0.00192048	0	0.00999131	0	0	0	0	0	0	0.0148004	0.0180381	0.00561426	0.0160388	0.0137909	0.0115149	0.00392111	0.00725576	0.00703539
dat1	B7HQ50	0.00336456	0	0.00700165	0.00381051	0.00681886	0.0033599	0.00368237	0	0	0.0356527	0.0603303	0.032786	0.0210742	0.0392613	0.0302599	0.0274781	0.0222453	0.0493021
	B7HZ01	0	0	0	0	0	0	0	0	0	0.00664766	0.00294615	0.00336223	0	0	0	0	0	0
	B7HNC4	0	0	0	0	0	0	0	0	0	0.00448408	0	0	0	0	0	0	0.00879314	0
nheC	B7HMQ4	0.0057554	0	0.00299424	0.0684415	0.0408251	0.0775903	0.176373	0.228399	0.342609	0	0	0	0	0.00258309	0	0	0	0
rluB	B7HKY1	0.0416437	0.0294694	0.0303312	0.00943267	0.0126597	0.020793	0.00455773	0.00500789	0	0.0481396	0.0426696	0.0608698	0.0260839	0.0299043	0.0374532	0.0297588	0.0275334	0.0266972
	B7HUD6	0	0	0	0	0	0	0	0.0171707	0.0131779	0	0	0	0	0	0	0	0	0
cysK1	B7HPX9	0.177784	0.1439	0.214001	0.114492	0.102441	0.12184	0.103011	0.0838412	0.0579106	0.30223	0.264911	0.264959	0.229264	0.197132	0.198561	0.202846	0.190969	0.178784
ilvE2	B7HMM3	0.00346	0.00816162	0.00720026	0.0039186	0	0	0	0	0	0.0066662	0.00295437	0.00337161	0	0.00310578	0.00345759	0	0	0
	B7HWK0	0	0	0.00499012	0	0	0	0	0.00576732	0.00663932	0	0	0	0	0	0	0	0	0
	B7HPZ3	0.00864116	0	0.00899112	0.00489324	0	0	0.00472869	0	0	0.00832422	0.0110675	0.0084204	0.00451039	0.0116347	0.0129527	0.00441073	0.00816177	0.00791388
	B7HU17	0.0481886	0.0378899	0.0167134	0.0363838	0.0651084	0.0802032	0.0703205	0.0579494	0.0222371	0	0.0137155	0	0	0.0144184	0	0.032796	0.0151717	0.0147109
	B7HN07	0	0	0	0	0.00417854	0	0.00902608	0	0	0.0278061	0.0316885	0.020091	0.0473517	0.0518194	0.0453273	0.0463054	0.0311582	0.0453179
	B7I059	0.00316359	0	0.00329172	0	0	0	0	0	0	0.00609512	0.00540255	0.0123311	0.00330258	0.00567942	0.00632277	0	0	0.00289733
	B7HTG3	0	0	0	0	0	0	0	0	0	0	0.00362479	0	0.00443166	0.00381056	0.0042422	0	0	0.00777575
	B7HRJ9	0	0	0	0	0	0	0	0	0	0	0	0	0	0	0	0.098977	0.0915753	0.044397
hisC	B7HVI1	0.0223406	0.0164682	0.0348681	0.0126509	0.0198088	0.0223097	0.0122254	0.0134329	0.00386598	0.0134508	0.0238448	0.00816371	0	0	0	0	0	0
dfrA	B7HQ33	0.0240016	0.00707703	0.0249737	0.0407743	0.0486435	0.059921	0.0394031	0.0360791	0.0415341	0.0115607	0.010247	0	0.00626401	0	0.0179887	0.0061256	0.011335	0.00549539
	B7HTR3	0.0116827	0	0.0243117	0	0	0	0	0	0	0.0281355	0.0249385	0.0284605	0.0121959	0.0367032	0.0291863	0.0119264	0.0386209	0.0320983
	B7HRD0	0.0191923	0.0129348	0.0484975	0.00931547	0.00833496	0.0164278	0.0180044	0.00989133	0.00379562	0.0396179	0.0585271	0.0480908	0.0715551	0.0935203	0.0657562	0.0867678	0.100996	0.118017
	B7HVF3	0	0	0	0	0	0	0	0	0	0	0	0	0.00219668	0	0.00210277	0	0	0
uvrA	B7HWZ3	0.056053	0.0521254	0.0527151	0.0647033	0.0469697	0.0592047	0.0613476	0.0596291	0.0298456	0.0747652	0.0570657	0.054621	0.105778	0.086115	0.0883296	0.117746	0.105887	0.103658
	B7HPV3	0	0	0	0	0	0	0	0	0	0	0	0	0	0	0	0.042601	0.0525536	0.0541424
	B7HN73	0.032949	0.032384	0.0399973	0.0248775	0.022259	0.0219356	0.0120204	0.0132077	0.00760231	0.0264504	0.0281339	0.0214048	0.022931	0.0246465	0.049389	0.0280304	0.0207474	0.0301759
	B7HWF5	0.0210646	0.0177458	0.0187866	0.0204485	0.0213455	0.0240405	0.0131739	0.0108563	0.00833181	0.0144943	0.0102779	0.0175941	0.00314142	0.00270115	0.00601425	0	0.00284228	0
	B7HS39	0.00737281	0	0.00767141	0	0	0	0	0	0	0.0213072	0.0283291	0.0251456	0.00384835	0.00992699	0.0184192	0.01129	0.0174095	0.0202568
relA	B7HQG6	0.0136485	0.0128779	0.0156214	0.0108203	0.00829831	0.0109037	0.00448131	0.00164131	0	0.0170923	0.0221425	0.0159598	0.00997366	0.0134763	0.0109112	0.00696663	0.00515652	0.00749987
	B7HKB2	0	0	0.00276851	0	0.00269623	0.00265707	0	0	0	0.00256316	0.00454383	0.00259277	0	0.00238835	0	0	0	0
	B7HYH8	0	0	0.00332906	0	0	0	0	0	0	0.00616426	0.0163915	0	0	0	0.00319725	0	0.00302198	0.00586039
	B7HUV8	0	0.00478942	0	0	0.00411497	0	0	0	0	0	0	0	0.00423921	0	0	0.00829108	0	0
	B7I0M7	0	0	0	0	0	0	0	0	0	0	0	0	0	0	0	0.0206702	0	0.0185436
	B7HRH9	0.017537	0.0413672	0	0.0397229	0.0355419	0.0875639	0.0191935	0	0.0485558	0	0	0	0	0.0157416	0.0350496	0.0179029	0.0331283	0.0160611
	B7HN20	0.0683102	0.0678456	0.093522	0.0732925	0.0692212	0.0646253	0.0472184	0.0216176	0.0149316	0.180097	0.187262	0.140137	0.11635	0.122633	0.111376	0.121119	0.108666	0.0987804
	B7HYS1	0.00577182	0.00680743	0.0120112	0	0	0	0	0	0	0	0.00492834	0.0112487	0	0	0	0	0	0
	B7HZ42	0.00608468	0	0.00949666	0.00689116	0.00924874	0.00607625	0.00665942	0.00365858	0.00421174	0.011723	0.0233797	0.00889384	0.01588	0.0136543	0.0212815	0.0279523	0.0201149	0.019504
sufS	B7HUX0	0.0785599	0.0567888	0.10811	0.0660118	0.0590637	0.0733898	0.0721126	0.042665	0.0420993	0.109856	0.0973732	0.0889001	0.0740745	0.088715	0.0861023	0.080199	0.0933503	0.092836
coaE	B7HRM3	0.0100727	0.01188	0.0262015	0.0114077	0.010207	0.0100587	0.0165361	0	0.00697219	0.00485161	0.00860067	0.014723	0.0105152	0.0180829	0.0150985	0.00514141	0.0237846	0.00922491
	B7HKT9	0.00747556	0.00440843	0.00777832	0.0042332	0.0113629	0.0111978	0.00818168	0	0	0.00720138	0.00957466	0.0109269	0	0	0	0	0	0
	B7HPU3	0.0328381	0.0301234	0.0531503	0.0371906	0.0332761	0.0218618	0.0239599	0.00877547	0.00505115	0.0597525	0.0685403	0.0639983	0.0418987	0.0720529	0.0401075	0.0372481	0.0379088	0.0601486
fabG	B7HLI4	0.15345	0.155128	0.159665	0.134066	0.102183	0.0963208	0.0959682	0.0843575	0.048556	0.173163	0.175948	0.183708	0.155614	0.141676	0.166487	0.120846	0.128373	0.112428
	B7HVZ2	0	0	0	0	0	0	0	0	0	0	0	0	0	0	0	0.00682918	0.012637	0.00918986
pyk	B7HRN8	0.272633	0.299824	0.260674	0.246181	0.212802	0.237304	0.181451	0.146206	0.0994573	0.246663	0.243802	0.253103	0.232688	0.203384	0.202492	0.233189	0.21749	0.234504
	B7HTE8	0	0	0	0	0	0	0	0	0	0	0	0	0.00592814	0.0152919	0	0	0	0.0104015
	B7HPV0	0.00802294	0	0.0166957	0	0	0.00400592	0	0	0	0.023186	0.0205515	0.0156359	0.0125631	0.0108023	0.012026	0.00409517	0.00378892	0.00734769
	B7HYW6	0.021087	0	0.0146274	0	0	0.0105289	0	0	0	0.016928	0.0360109	0.0205483	0	0.0126188	0.0105362	0.00717567	0.0199172	0.0289684
vacB	B7HW46	0.00624352	0.00736376	0.00649638	0.00565685	0.0101229	0.0124698	0.00546661	0.00150164	0	0.0649569	0.0511787	0.068141	0.0469282	0.049318	0.037435	0.036968	0.0507154	0.058324
	B7HNC3	0.0640505	0.0539591	0.0666445	0.0207257	0.0185442	0.0365496	0.0150215	0.00550173	0.00633357	0.0440723	0.0703161	0.0401234	0.0143281	0.0164266	0.0137155	0.0140115	0.00432122	0.00837996
	B7HUB8	0	0	0	0	0	0	0	0	0	0	0.00257756	0	0	0.00541932	0.00603321	0.0123268	0.0370661	0.0193525
	B7HPP2	0.0089634	0.0105717	0.0373057	0.00507572	0.00454147	0.008951	0	0	0	0.00431732	0.00765351	0	0	0	0	0	0	0
	B7HKB8	0	0	0	0.0287376	0.0385692	0.0380089	0.0416567	0.0305141	0	0	0	0	0	0	0	0	0	0
	B7HZN9	0.00323966	0	0.00337086	0	0	0	0	0	0	0	0.0110649	0.00631378	0.00338198	0.00290799	0	0.00330725	0.00305993	0.00296699
	B7I0C7	0.00417012	0	0	0	0	0	0.00456401	0.0050148	0	0	0	0	0.00870663	0.0149728	0.00416721	0.0723711	0.0433265	0.0611063
ffH	B7HLH8	0.0440325	0.0409998	0.0506386	0.0603675	0.0493166	0.0578574	0.0405825	0.0250823	0.0192498	0.0826026	0.0831108	0.0722655	0.0701601	0.0665677	0.0648448	0.0520488	0.0459676	0.0551837
	B7HPN4	0.0222278	0.013108	0.02891	0.00629349	0.00563106	0.0138732	0.00304092	0.00668254	0	0.0133828	0.0166071	0.00541499	0.00870162	0.00997609	0.00832961	0	0.0104973	0.0101785
acnA	B7I062	0.17047	0.177805	0.166514	0.0748618	0.0705075	0.0764315	0.0545754	0.052993	0.0337135	0.144109	0.149519	0.140124	0.104112	0.103053	0.0892314	0.106547	0.112818	0.11364
rpoA	B7HQX1	0.174088	0.166583	0.191392	0.085561	0.0565843	0.0918437	0.0970634	0.0750501	0.0409251	0.155046	0.145843	0.163239	0.137159	0.132678	0.164119	0.134129	0.142713	0.141387
	B7HP02	0.00316247	0	0.00329055	0	0	0	0	0	0	0.0243718	0.0270031	0.0246534	0.016507	0.0227096	0.012641	0.151737	0.176234	0.153504
	B7HRZ7	0.00908146	0.0107109	0.00472463	0	0.00460129	0	0	0	0	0.0174968	0.0116315	0.00884946	0.00948043	0.00815172	0.00907513	0.00463547	0.00428882	0.00415856
	B7HUP9	0.00521551	0	0.0108535	0	0	0	0	0	0	0.0100484	0.00890667	0.00508227	0	0.00234078	0	0	0.00246308	0.00238828
	B7HXT0	0.0772556	0.0565555	0.0997876	0.0874954	0.083685	0.0957708	0.0962154	0.0768862	0.0479435	0.138579	0.145579	0.160948	0.152956	0.141084	0.159728	0.130539	0.145939	0.156146
trx	B7HRG4	0.459895	0.542411	0.322481	0.577465	1.00297	0.778742	0.809713	0.757436	0.719711	0.337086	0.30732	0.418919	0.553157	0.502553	0.519518	0.58176	0.528811	0.402875
	B7HL31	0	0	0.00657149	0.00715281	0.00639994	0.00630696	0.00691227	0.00759498	0	0.00608406	0.021571	0	0.0131863	0.0170074	0.0252452	0.00644748	0.00596532	0.00578415
fumC	B7HMF4	0.111681	0.118279	0.139919	0.129065	0.0970032	0.120631	0.0922961	0.0767443	0.0599503	0.155888	0.179044	0.135479	0.109449	0.102293	0.0865493	0.0977238	0.0904158	0.0897571
	B7HVL2	0	0	0	0	0	0	0	0	0	0.00245656	0.00217743	0	0.00532424	0.00457803	0	0	0	0
	B7HNS0	0	0	0	0	0	0	0	0	0	0	0	0	0	0	0	0	0.00619896	0.0120214
	B7HK52	0.173075	0.213478	0.221325	1.11923	0.934485	1.04493	1.15823	1.37431	1.48333	0.0827272	0.0767114	0.0656589	0.079995	0.0379495	0.0316863	0.05395	0.022462	0.0169398
	B7HRT2	0	0	0	0	0	0	0	0	0	0.00345932	0.00613249	0.00349929	0.00749757	0.00322339	0.00358852	0.00733191	0.00339181	0.00657758
	B7HQ85	0	0	0	0	0	0	0	0	0	0	0	0	0	0.00733111	0.00408078	0.0125065	0.0154283	0.0149597
	B7HL70	0.0633894	0.130835	0.0329783	0.0717913	0.192704	0.110778	0.069377	0.0762292	0.0877549	0.0152661	0.0135315	0.0463275	0.0827177	0.0568997	0.0316726	0.145602	0.149682	0.101595
ptsI	B7HN26	0.179131	0.185402	0.203503	0.111788	0.0944645	0.118647	0.0820214	0.0637452	0.0455483	0.153192	0.14671	0.158524	0.0667859	0.0672701	0.0639307	0.0690422	0.0776908	0.0803533
	B7HQP1	0	0	0	0	0.0306877	0.0151209	0.0165721	0	0	0.0145865	0.0129291	0.0147551	0.0632284	0.0543668	0.0151313	0.13912	0.0429056	0.0554699
	B7HU53	0	0	0	0	0	0	0	0	0	0	0	0	0	0	0	0.01965	0.036361	0
	B7HY83	0	0	0	0.012071	0.0108005	0	0	0	0	0.0102674	0.00910074	0.010386	0.0222531	0.0287014	0.0213018	0.0217614	0.030201	0.0195225
gtaB	B7HUR2	0.105609	0.0642878	0.0886177	0.0540159	0.0552347	0.0612364	0.0447423	0.0163872	0.0188648	0.0886082	0.101811	0.0829926	0.053346	0.0703331	0.0510654	0.0626007	0.0514838	0.0748803
secA	B7HXP1	0.015371	0.0135967	0.0106623	0.00435207	0.00778798	0.00511656	0	0	0	0.0246786	0.0251556	0.0237156	0.0093603	0.00574888	0.00768012	0.00261528	0.0024197	0.00351932
	B7HL90	0.0109302	0.00859426	0.0303277	0.0288842	0.040612	0.0291069	0.0438631	0.0569582	0.0756578	0.0245685	0.0373317	0.0248523	0.0190174	0.0196224	0.0254861	0.0111583	0.0206477	0.0266941
maP1	B7HQW6	0.0131908	0.00518586	0.0183001	0.00497973	0	0	0	0	0	0.00847135	0.0112632	0.0128538	0	0.0039468	0.0131816	0.00448869	0	0.00402688
	B7HVS5	0.00404218	0	0.00420588	0	0	0.00403658	0	0	0	0.00778784	0.00690293	0.00787782	0	0.00362835	0	0	0	0.00370197
	B7HLI9	0.0928578	0.0804628	0.104506	0.0579484	0.0537693	0.0700201	0.0414812	0.0364626	0.0262348	0.0821499	0.0906147	0.0794057	0.0553927	0.0442272	0.0435559	0.0444957	0.0393783	0.0381824
dinG	B7HL56	0	0	0	0	0	0	0	0	0	0.00102871	0.000911818	0.00104059	0	0	0	0	0	0
yqjI	B7HQZ6	0.00221111	0	0.00920264	0	0	0.0044161	0	0	0	0.00639004	0.0113279	0.00646387	0	0	0	0	0	0.00202501
	B7HMB4	0	0	0	0	0	0	0	0	0	0.0192573	0.0341382	0	0	0.0538317	0	0.0204076	0	0.018308
	B7I0D6	0	0	0	0	0	0	0	0	0	0	0	0	0	0	0	0.0406344	0.0689254	0.0425295
sigH	B7HQS8	0.0272394	0.0267723	0.0330663	0.0411331	0.0460045	0.0272017	0.00993744	0.0163784	0.00628493	0.0481073	0.0310116	0.053087	0.014218	0.00407511	0.0272204	0.00463462	0.00857607	0.0041578
	B7HMY3	0.00530308	0.00312729	0.00551785	0	0	0.00264787	0	0	0	0.00255429	0.00226405	0	0	0	0	0	0.00250444	0
	B7HMM9	0	0	0	0	0	0	0.00301122	0.0132346	0.0609423	0.00265043	0.00939707	0	0	0	0	0	0	0
	B7HUD8	0	0	0	0	0	0	0	0	0	0.00450625	0.00798843	0.00455831	0.00488332	0.00839783	0.00934911	0.00477542	0	0.00428411
	B7HT76	0.0246384	0.0326915	0.0448634	0.010464	0.0124835	0.0276798	0.0134828	0.00370362	0.0127908	0.0296684	0.0394458	0.0330123	0.0160755	0.0248804	0.0184659	0.0125762	0.0232715	0.0310264
proS1	B7HT92	0.0650432	0.0692896	0.0785931	0.0332677	0.0255138	0.03981	0.0229635	0.0201853	0.00580931	0.0525515	0.0734534	0.0572478	0.0219034	0.0263671	0.0230637	0.0299872	0.0396353	0.0384315
	B7HW00	0.0309719	0.0243527	0.0322263	0.0935388	0.0836933	0.0618581	0.079094	0.0993212	0.0714614	0.029836	0.0440763	0.0503011	0.0538876	0.0463351	0.0412671	0.0526969	0.0292537	0.0378203
asd	B7HLD4	0.0783952	0.0675678	0.100394	0.0478078	0.0488866	0.0481764	0.0363001	0.0290076	0.0292192	0.0813291	0.0875353	0.0793306	0.0598056	0.0595432	0.0723143	0.0707966	0.074046	0.0883657
sigK	B7HPN8	0	0	0	0	0	0	0	0	0	0	0	0	0	0	0	0.0172681	0.0279594	0.0193644
sodA2	B7HZD0	0.186423	0.17477	0.238736	0.17865	0.159846	0.181391	0.183105	0.189694	0.20514	0.128933	0.114283	0.111791	0.184633	0.175919	0.157632	0.175673	0.148991	0.205755
ampS	B7HSY9	0.0683678	0.0597294	0.068502	0.0487519	0.0487523	0.0657445	0.0415698	0.0334954	0.0315489	0.119524	0.125402	0.103633	0.0687279	0.072733	0.0733808	0.0620393	0.0741415	0.090442
sigA	B7HPJ2	0.0769586	0.0500783	0.049702	0.0420768	0.0376479	0.0636017	0.0377573	0.0191476	0.00734757	0.0894745	0.0770418	0.0646487	0.0387846	0.040495	0.0530379	0.0433458	0.0350913	0.0315951
	B7HZ54	0.0134921	0.0119347	0.0105289	0.0076402	0.010254	0.0134734	0.0147665	0.00405625	0.00466954	0.0129973	0.0172806	0.00657371	0	0.0030277	0	0	0.0031859	0.00617828
sipS2	B7HLH2	0	0	0	0	0	0	0	0	0	0.0104979	0.0186102	0.0212385	0.0170646	0.00978197	0.0217801	0.0278126	0.00514653	0.0149707
aroC	B7HVI2	0.0216428	0.0287168	0.0394089	0.0398311	0.0274143	0.0216129	0.00888267	0.00650667	0	0.0182429	0.03003	0.0158174	0.0028242	0.00242838	0.00270346	0.0027618	0.00255526	0
thrC	B7HNB6	0.0153105	0.0108346	0.00955835	0.0208078	0.0217206	0.00917359	0.0167567	0.0220941	0.0211955	0.0265481	0.03399	0.0179032	0.0415561	0.0329833	0.0489595	0.0531419	0.05206	0.0448701
	B7HVC5	0.111809	0.0941933	0.124647	0.0633145	0.0539526	0.0584857	0.0553581	0.0352149	0.0257977	0.189772	0.179574	0.173806	0.141733	0.136206	0.143655	0.144037	0.150866	0.134094
	B7HS47	0	0	0	0	0	0	0	0	0	0	0	0	0.00421119	0	0	0.0205907	0.0152407	0.0258612
sph	B7HW99	0	0	0	0.0211741	0.0126303	0.0062234	0.0238724	0.14614	0.280393	0	0	0	0	0	0	0	0	0
spoIVA	B7HL19	0.0206343	0.00486732	0.047234	0	0.00209095	0.0123634	0.0632334	0.0620347	0.0314222	0	0.00176189	0	0.10555	0.100018	0.0948516	0.189583	0.159814	0.171968
	B7HMA0	0	0.0104483	0	0.010033	0.00897694	0	0.0193911	0	0.0122639	0	0	0	0	0	0	0	0	0
	B7HW85	0.0129436	0.015266	0.00673391	0.0073296	0	0	0	0.0077827	0.00895942	0.0124689	0.00552603	0.00630647	0	0.00580923	0.00646729	0	0.00611276	0.0177813
	B7HWE1	0	0	0	0	0	0	0	0	0	0.0269221	0.0203278	0.02219	0.0356582	0.0408809	0.0227559	0.0464938	0.0479051	0.0445543
	B7I0M0	0.00664428	0	0.00691337	0	0	0.00663508	0.00727188	0	0	0.0192018	0.0056733	0.00647454	0.00693617	0.0119281	0	0.0135658	0	0
	B7HVJ8	0	0	0	0	0	0	0	0	0	0	0	0	0.0125546	0.019791	0.0100149	0.0470627	0.0492228	0.064249
	B7HT61	0	0	0.0192673	0	0	0	0	0	0	0	0	0	0	0	0	0	0	0
purA	B7HZF4	0.178677	0.182258	0.23616	0.0683648	0.0831898	0.0795701	0.0660657	0.0464582	0.0200559	0.179102	0.160813	0.176465	0.0705777	0.0715228	0.074799	0.0665532	0.104908	0.101721
	B7HSK7	0	0	0	0	0	0	0	0	0	0.00314175	0.00278476	0.00635609	0	0.00292747	0	0.00332941	0.00616086	0.00597375
	B7HLB8	0.00377275	0	0.00392555	0	0	0.00376753	0.00412912	0	0	0.0145375	0.00644283	0.0147055	0.0118155	0.00677301	0.0150805	0.00770294	0.00356345	0.0103657
	B7I033	0.335373	0.289786	0.285509	0.219364	0.208996	0.245361	0.221801	0.187633	0.158899	0.589131	0.519127	0.519043	0.466184	0.442703	0.394281	0.479684	0.492937	0.519028
glnA	B7HKQ9	0.382052	0.410128	0.392764	0.217641	0.197051	0.180481	0.157741	0.126552	0.0981797	0.4033	0.375055	0.387896	0.274647	0.244369	0.246903	0.305946	0.302514	0.316374
rrf12	B7HU38	0	0	0	0	0	0	0.0247922	0.0090803	0	0	0	0	0	0	0	0.0385419	0.0213958	0.0138307
	B7HTM7	0	0	0.0053207	0	0	0.00255326	0	0	0	0	0	0	0	0	0	0	0	0
pepF2	B7HZ70	0.0100135	0.0177153	0.0208381	0.0207913	0.0202941	0.0216659	0.00913279	0.00802786	0.00462082	0.0337618	0.0441758	0.0439096	0.0261335	0.0419456	0.0300195	0.0272598	0.0425609	0.0565528
cggR	B7HW57	0.0030656	0	0.00637952	0	0	0	0	0	0	0.00295316	0.0104704	0	0	0	0	0	0	0
cutC	B7HVV1	0.00928719	0.00547677	0.014495	0	0.00470553	0.00463717	0	0	0	0.00447328	0.011895	0.00904993	0.0048476	0	0.00464036	0.00474048	0.00438598	0
cspD	B7HTX1	0.681642	0.579589	0.296895	0.233392	0.803178	0.411585	0.503135	0.915028	0.592525	0.0458122	0.0270711	0.0772358	0.264777	0.241897	0.174252	0.420755	0.344372	0.450057
ilvE1	B7HKC0	0.0657696	0.0408264	0.0684332	0.10585	0.0912008	0.0829624	0.0985016	0.0874169	0.0862578	0.0533535	0.0502468	0.05397	0.0542044	0.0466075	0.0553463	0.0353378	0.0555818	0.0507235
	B7HV56	0.0234382	0.0138218	0.0304842	0.0132724	0.0178131	0.0175543	0.012826	0.0140928	0.00811181	0.0282231	0.0250162	0.0171295	0.00611696	0.015779	0.0117109	0.0059818	0.00553446	0.00536637
	B7HW15	0	0	0	0	0	0	0	0	0	0.00283468	0.00753775	0.00573486	0.00614376	0.00264135	0.00882166	0.00600801	0.00555871	0.00269494
	B7HQ74	0	0	0	0	0	0	0	0	0	0	0.00175022	0.0019974	0	0.00183991	0	0.00209253	0.00387209	0.00375449
	B7HZZ6	0.00596852	0	0.0186307	0.0135192	0.0120962	0.00596026	0.00653229	0.00717748	0.0165254	0.0229984	0.0356741	0.0290802	0.0498458	0.0321449	0.0417505	0.0365583	0.028187	0.0327971
	B7HM20	0.018125	0.0213771	0.0330034	0.0359229	0.0183668	0.00904997	0.0148778	0.0163473	0.0125459	0.0261904	0.0193454	0.026493	0.00946064	0.00813471	0.0135843	0.0092516	0.00855974	0.00414989
	B7HWQ2	0	0	0	0	0	0	0	0	0.00548681	0	0	0	0	0	0	0	0	0
msrA1	B7HMM2	0.0167754	0.0131902	0.0116366	0.0189989	0.0396647	0.0335044	0.02448	0.0134489	0.00774117	0.0215469	0.0381971	0.0108979	0.0233499	0.0200773	0.0167637	0.011417	0.0158448	0.0102424
	B7HV07	0.052283	0.0385399	0.0374003	0.00740159	0.0099338	0.0163158	0.00357634	0.00392957	0	0.0220348	0.0195311	0.0127368	0	0	0.00326541	0.00333586	0	0.00299266
	B7HQQ9	0	0.008646	0.00762759	0	0.00742846	0.00732055	0.00802313	0	0	0	0	0	0.0153055	0.0197406	0.00732558	0.0149673	0	0
divIB	B7HM29	0.00386916	0	0	0	0	0.00386381	0	0	0	0.0074545	0.00330373	0.00377032	0	0.00694609	0.00386646	0.00394989	0.00365451	0.00708704
	B7HSS5	0.007148	0	0.0074375	0	0	0	0	0.00859587	0.00989554	0.00688583	0	0.0139308	0	0	0	0	0	0.0065464
	B7HSG6	0	0	0	0	0	0	0	0	0.00201286	0	0.0012415	0	0.00151786	0	0	0	0	0
	B7HS93	0	0	0.0038609	0	0	0	0	0	0	0.0107236	0.00950509	0.0108475	0.00387364	0.00333074	0.00370803	0.00378804	0.00350477	0.00339832
	B7HKR1	0.00498171	0.00587555	0.00518347	0.002821	0.00252407	0.00248741	0.00272613	0.00299539	0	0	0	0	0	0	0	0	0	0
	B7HN00	0.150787	0.135807	0.168304	0.133513	0.130573	0.123201	0.114021	0.0923134	0.068317	0.372385	0.341777	0.347301	0.349167	0.312535	0.369856	0.333056	0.310738	0.333942
dacA	B7HQY8	0	0	0	0.00426149	0	0	0	0.00452492	0	0.00362475	0.00642576	0.00366663	0.00785612	0.00337753	0	0.00768253	0	0.00689214
	B7HUI5	0	0	0	0	0	0	0	0	0	0.0109121	0.00644815	0.00367941	0	0	0.00377324	0	0	0
	B7HXL4	0	0	0	0	0	0	0	0	0	0.00337151	0	0	0	0.00314157	0	0.0035729	0.00165285	0.00160266
	B7HTY1	0	0	0	0	0	0	0	0	0.00205289	0	0	0	0	0	0	0	0	0
	B7HRR7	0.137346	0.129592	0.107181	0.0855528	0.06263	0.102867	0.0901916	0.0495499	0.0475347	0.092616	0.087956	0.10707	0.179225	0.178763	0.150975	0.133201	0.103781	0.106919
	B7HXC9	0.0138103	0.00814413	0.0359242	0.0156408	0.0279891	0.0275825	0.0226722	0.0166077	0.0191187	0.0399115	0.0471686	0.0538301	0.0504597	0.0495859	0.0483025	0.028197	0.0260884	0.037944
	B7HR62	0.00472374	0	0.00983011	0	0	0	0	0	0	0.00455049	0.0121003	0.00920613	0.00493126	0.00424014	0.00472045	0	0	0.00432617
pabB	B7HPY0	0.0150901	0.00762754	0.0112151	0.0097658	0.00873789	0.0150692	0.00471869	0.00259238	0.00596867	0.0186899	0.0257697	0.0189058	0.0112521	0.0077401	0.00646266	0.0022007	0.00610838	0.00394858
	B7HK67	0.0498297	0.0391802	0.0172826	0.13168	0.185146	0.182456	0.163609	0.179769	0.114972	0	0	0	0.0173396	0.0149094	0	0	0.0156884	0.0304239
	B7HV93	0.00105162	0	0	0	0	0	0	0	0	0.00303915	0.00179588	0.00204951	0	0.000943959	0	0	0	0
	B7HMC3	0	0	0	0	0	0	0	0	0	0	0.013983	0	0.0256433	0.0293991	0.024547	0.0167178	0.0232014	0.0149978
	B7HLP7	0	0	0	0	0	0	0	0.00476274	0	0	0	0	0	0.00355505	0.00395775	0	0.00748159	0.00362718
	B7HS70	0.00402168	0	0.00836911	0.00455472	0.00815062	0.00803222	0.00440155	0	0	0.0309934	0.0377736	0.0313515	0.0293885	0.0397094	0.0482264	0.00410559	0.0189928	0.0294656
	B7HU59	0	0	0	0	0	0.0118683	0	0	0	0	0	0	0.0124068	0.021336	0.0118764	0.279052	0.224508	0.19592
guaA	B7HS06	0.205041	0.206613	0.256843	0.146545	0.133138	0.170963	0.115472	0.0909688	0.0606291	0.159167	0.15298	0.141608	0.0706569	0.064328	0.0596791	0.044709	0.0564076	0.0565175
	B7HP22	0.00386345	0	0.00401992	0.00875105	0	0.0038581	0.00422838	0.00464601	0	0	0.00659771	0.00376475	0.00403318	0.00346792	0	0	0	0
	B7HQ41	0.0329798	0.0216095	0.0190641	0.0124503	0.0111399	0.0073187	0.0080211	0.00440667	0	0.0282401	0.0281602	0.0285664	0.0344286	0.0328926	0.0366186	0.0224453	0.0207668	0.01678
	B7HVU4	0.00664716	0	0.00345819	0.0037641	0.00336791	0.00331898	0.00363752	0	0	0.0192101	0.0113515	0.0129547	0.00346959	0.00596664	0.00332126	0	0	0.00304385
kynB	B7HTI8	0.00994129	0.0058625	0.00517196	0	0	0	0	0	0	0	0.00424425	0	0	0	0	0	0	0
	B7HXY8	0	0	0.00683268	0.00743711	0	0.00655764	0.007187	0.00789685	0.00909083	0	0	0.00639897	0	0	0	0.00670374	0	0
	B7HZW0	0.126576	0.133976	0.138457	0.0955688	0.0690654	0.0745442	0.0674901	0.0429324	0.0359445	0.150072	0.152419	0.151806	0.0711507	0.0728318	0.0713522	0.076205	0.0888992	0.101061
	B7HRI9	0.0231329	0.0285827	0.0171927	0.154699	0.108277	0.117704	0.157936	0.230497	0.315672	0.0180398	0.0178711	0.0289825	0.0367987	0.023731	0.0341247	0.00787185	0.011445	0.0110974
	B7HW21	0	0	0	0.00470311	0.00420808	0.00414694	0.00454494	0	0	0	0.00354583	0	0.00433513	0	0	0.00423934	0.00392231	0.00380318
resC	B7HKY4	0	0	0	0	0.00268665	0	0	0	0	0	0.00452767	0	0.00553552	0.00951942	0.00794831	0.013533	0.0150252	0.016997
	B7HUK9	0.00759496	0	0.00790255	0.00860162	0.00769625	0.0151689	0.00831235	0	0	0.0146328	0.0259402	0.0222028	0.0317145	0.0272696	0.022769	0.00775342	0.0286944	0.0278229
fumA	B7HU18	0	0	0.00213576	0	0	0	0	0	0	0	0.00350532	0.00200019	0	0	0	0	0	0
	B7HPR2	0	0	0	0.00749921	0	0	0.00724702	0	0	0.00637871	0.0113078	0.0064524	0.00691246	0.017831	0.0132339	0.0135194	0.0125084	0.0181928
	B7HP23	0	0	0	0	0	0	0	0	0	0	0	0	0.0080374	0	0	0.0078598	0.00727203	0.0141023
pcrA	B7HSW4	0.0270016	0.0143308	0.0210713	0.00764511	0.00684042	0.0148303	0.00443281	0.00324709	0.00186902	0.0130056	0.0149862	0.00920911	0.00563755	0.00727116	0.00404741	0.00551299	0.00637589	0.00989159
	B7HKE8	0	0	0	0	0	0	0	0	0	0.0493663	0.0551013	0.0591842	0.0217951	0.0221479	0.0303467	0.0174384	0.0250978	0.0295503
	B7HNS8	0.33691	0.326039	0.374525	0.397872	0.347239	0.399707	0.327763	0.283953	0.227226	0.42719	0.410613	0.437737	0.303614	0.261062	0.322287	0.399793	0.443331	0.450964
	B7HP13	0	0	0	0	0	0	0	0	0	0.0203603	0.0240624	0.0205955	0.0367733	0.0505911	0.0352012	0.0431529	0.0332715	0.0451654
rnmV	B7HPV1	0.00550166	0	0	0	0	0	0	0	0	0.0264994	0.0187907	0.00536111	0.00574336	0.00493841	0.0164935	0.00561645	0	0
	B7HPC3	0	0	0	0	0	0	0	0	0	0	0	0	0	0.00906062	0.00504349	0	0	0.00462224
zapA	B7HRJ6	0.0113398	0.0133745	0.0117991	0.0128429	0.0114911	0	0	0	0	0.0218478	0.0387306	0.0110501	0.023676	0.0203578	0.0113319	0.0115764	0.0214214	0.0103854
	B7HRP3	0.114537	0.119737	0.132719	0.11203	0.102876	0.0857841	0.0683761	0.0469559	0.0468481	0.112844	0.102245	0.101465	0.0815243	0.0864549	0.085843	0.0664358	0.0737611	0.0715209
panE1	B7HMP9	0	0	0.00677393	0	0	0	0	0	0	0.00313574	0.00833831	0	0.0169907	0.00876563	0.00650572	0.00996915	0.00922363	0.00596233
	B7HY06	0.0267884	0.0210633	0.0402615	0.016855	0.0180971	0.0148619	0.0162882	0.0143176	0.00824117	0.0286732	0.0254151	0.0203031	0.00932176	0.00534353	0.0118977	0.00607719	0.00281136	0.00272598
	B7HKX8	0	0	0	0	0	0	0	0.00332701	0.00383004	0	0	0	0	0.00248338	0.00276469	0.00847302	0.020905	0.0202701
carA	B7HLM1	0.0795786	0.0636886	0.0798443	0.00965638	0.0144	0.0227053	0.0124422	0.00341777	0.00393453	0.0684463	0.0655224	0.0581591	0.0148347	0.020409	0.0142005	0.00870417	0.00268442	0.00780867
	B7HSL5	0.0544413	0.0535078	0.0566461	0.143867	0.147113	0.117793	0.16882	0.218229	0.188418	0.0524445	0.0464854	0.0265252	0.13261	0.154748	0.126941	0.138943	0.102842	0.116338
spoIIIJ2	B7HZH2	0	0.00954041	0.00420832	0.00916119	0.00819692	0	0	0.00486376	0	0.0272732	0.0207208	0.019706	0.0253332	0.0254132	0.0161668	0.0247734	0.0229208	0.0148165
	B7HXZ9	0	0	0	0	0	0	0	0	0	0.0017716	0.00157029	0.00179206	0.00191984	0.00165077	0	0.00187742	0.00173702	0.00336853
	B7HTS4	0	0	0.00820637	0	0	0	0	0.00948449	0	0	0	0	0	0	0	0	0	0
	B7HR02	0.014337	0	0.00994509	0.00270621	0	0.00238619	0.0026152	0.0028735	0.0099239	0.0115093	0.0102015	0.00698536	0.00748342	0.0064346	0.00477566	0.00975742	0.00902774	0.0109419
	B7HUR9	0	0	0	0	0	0	0	0	0	0	0	0	0	0	0	0.0158345	0.00976692	0.00710272
	B7HLC5	0.0203988	0.0240588	0.0360824	0.0254128	0.0227379	0.0264817	0.0111628	0.0073592	0.00564792	0.0235807	0.0348355	0.0258409	0.0170359	0.0201414	0.0163076	0.0145771	0.013487	0.0242865
	B7HWI5	0	0	0.0074281	0	0.00723418	0	0.0078133	0	0	0.0137543	0.0121914	0.00695659	0.0298104	0.0448567	0.028536	0.0218638	0.0134858	0.0261525
	B7HK58	0.00681828	0.00804165	0.0212833	0.007722	0.00690921	0.00680884	0.00746231	0	0	0.0065682	0.0174656	0.0265764	0.0142356	0.0306012	0.013627	0.0208816	0.00644002	0.00624442
cobB	B7HVU2	0	0	0	0	0	0	0	0	0	0.00400016	0	0	0	0	0.00414957	0	0	0
spoVFA	B7HLD6	0	0	0	0	0	0	0	0	0	0	0	0	0	0	0	0.0430699	0.0365283	0.0257592
	B7HVE5	0	0	0	0	0	0	0	0	0	0	0	0	0.00873963	0.0187869	0.00836601	0.017093	0.0197685	0.0115009
	B7HKX5	0	0	0	0.00840238	0.015036	0.0148175	0.0243594	0.0178436	0.0102707	0	0	0	0.00774496	0.00665949	0.00741386	0.00757383	0.00700744	0
	B7HSP1	0.0760897	0.0712658	0.100128	0.0963132	0.0793723	0.0960979	0.0710303	0.0861196	0.086748	0.0905458	0.108921	0.106857	0.0513975	0.044194	0.0469638	0.0479772	0.0549582	0.0573882
	B7HYD6	0.0120435	0.0142044	0.0187968	0.0272795	0.0183061	0.0240536	0.0263621	0.0144829	0.00833635	0.0406061	0.077126	0.052811	0.0502902	0.0540524	0.0421227	0.0122948	0.0284383	0.0386044
	B7HLU2	0	0.00930355	0	0.0178675	0.0399671	0.0393865	0.0431665	0.037944	0.0327608	0	0	0	0	0	0	0	0	0
	B7HVI6	0	0	0	0	0	0	0	0	0	0.00268338	0.0095139	0.00814316	0.00581584	0.00750111	0.00278361	0.00284367	0.0105241	0.00765331
maP3	B7HYB7	0.038164	0.0150039	0.0308853	0.01921	0.012891	0.0296421	0.013923	0.0203975	0.00587038	0.0408492	0.0325869	0.0371891	0.0221337	0.0152253	0.0127125	0.0216446	0.0160208	0.0271849
ddlB	B7HSC9	0.00339838	0.00400813	0.00707203	0	0	0	0	0	0	0.00982121	0.00870525	0.00662312	0.00354768	0.00915139	0.010188	0.00693857	0.0224689	0.0217865
	B7HL16	0	0	0	0	0	0	0	0	0	0	0	0	0	0	0	0.579402	0.513262	0.37602
glgC	B7HTX8	0	0	0.0116364	0.00949931	0.00849945	0.00279199	0.00305995	0.00672436	0	0.0107733	0.00954913	0.00544887	0.00291869	0.00501926	0.00838174	0	0	0.0051211
	B7HZB4	0.00300749	0.00709421	0.0125172	0.00340611	0.0030476	0.00300332	0.00329156	0	0	0.00579436	0.0102719	0.00879196	0.0125584	0.00809876	0.00601078	0.0153512	0.0113626	0.00550873
	B7HT71	0.00317466	0	0.00330323	0.00359544	0.003217	0.00317026	0.00347453	0	0	0.0122329	0.0135536	0.00928066	0.026513	0.0199475	0.0253795	0.0194454	0.0089956	0.0174448
	B7HR09	0.0121685	0	0.0253227	0.00459379	0.00411027	0	0.0133179	0.0146333	0.0224611	0.0117222	0.0173171	0.0079051	0.00846874	0.00728182	0.00810669	0.00828161	0.0153246	0.0111444
	B7HPN2	0.0414953	0.0734108	0.0647637	0.0704928	0.0315365	0.0517973	0.0227074	0.0249502	0.0143613	0.08994	0.0797203	0.0909791	0.0758069	0.121053	0.0621995	0.0529513	0.0489915	0.0475036
valS	B7HQL5	0.102681	0.119774	0.0986212	0.0562285	0.0606009	0.0653545	0.0284037	0.0352799	0.0234312	0.0771755	0.0780409	0.0725694	0.0435836	0.0364624	0.0304446	0.0449244	0.0426306	0.0568368
	B7HPZ2	0.0176245	0.0170074	0.0216725	0.0108876	0.00811799	0.00640004	0.00175357	0.00385354	0	0.0339562	0.032834	0.0312259	0.0117083	0.0186965	0.0112078	0.00981395	0.0075667	0.0132064
	B7HN90	0	0	0	0	0	0	0	0	0	0	0	0	0	0	0	0	0.00246689	0.00358795
	B7HP14	0	0	0	0	0	0	0	0	0	0	0.00455434	0	0	0	0	0	0	0
	B7HXN0	0	0	0	0	0	0	0	0	0	0	0	0	0.010913	0.0218949	0.0069643	0.0142291	0.0164563	0.0287217
	B7HVB7	0.112747	0.060444	0.106649	0.162516	0.166183	0.18424	0.112179	0.0739553	0.0851371	0.12836	0.131278	0.179782	0.235401	0.257611	0.327763	0.198809	0.183941	0.168968
	B7HNJ0	0.0097428	0	0	0	0	0.00486466	0	0	0	0.00469273	0.00415951	0	0.00508541	0.00874535	0.004868	0.00497304	0.00460115	0.0089228
sspH	B7HLY5	0	0	0	0	0	0	0	0	0	0	0	0	0.0361459	0	0	0.106042	0.0163519	0.0158553
	B7HQP8	0	0	0.00467385	0	0	0	0	0	0	0.00865435	0.0115065	0.00437717	0.00937853	0.00806411	0.0179552	0.013757	0.0127282	0.0164555
	B7HYE1	0.0385505	0.0318272	0.0521454	0.0174641	0.0195323	0.0192486	0.00843838	0.00463591	0	0.0297093	0.0362086	0.0225394	0.0160976	0.0138415	0.0154095	0	0.00364118	0.00706119
	B7I0F6	0	0	0	0	0	0.00442333	0.00484785	0.01598	0.00613204	0.017068	0.0226929	0	0.0601126	0.0636157	0.0663955	0.0678281	0.075307	0.093303
ileS1	B7HQ07	0.0174331	0.00913826	0.0120928	0.00658127	0.00588855	0.00386867	0.00105999	0.00116468	0	0.0354535	0.0339059	0.0330318	0.035387	0.0478145	0.034842	0.0464696	0.0448241	0.0558806
	B7HML4	0.0142028	0.0125633	0.0110835	0.0160853	0.0143922	0.00709157	0.0116583	0.0128097	0.00983101	0.0205228	0.0212227	0.0138399	0.0222401	0.0159359	0.031934	0.0181239	0.0134149	0.00975557
	B7HQZ7	0.00154408	0	0.00160661	0	0.00156467	0	0	0	0	0.00148744	0.00131843	0.00150463	0	0.002772	0	0	0	0.00282824
citC	B7HRN3	0.251628	0.279489	0.317742	0.213044	0.215375	0.231763	0.208553	0.152767	0.128517	0.303588	0.281608	0.323759	0.214227	0.190781	0.185538	0.127192	0.159215	0.14543
	B7HSI1	0.0144948	0.00854778	0.0527865	0.024624	0.0367203	0.0289495	0.0237959	0.0784387	0.0902984	0.0907607	0.0866361	0.120058	0.325329	0.260217	0.376602	0.258952	0.212206	0.23231
parC	B7I045	0.01129	0.00887712	0.00261049	0.00710355	0.00508469	0.00501082	0.0041188	0.00603414	0.00347324	0.00604216	0.00642673	0.00611197	0.0052382	0.00675609	0.00501427	0.00384185	0.00355454	0.00344659
	B7HWZ0	0	0	0	0	0	0	0	0	0	0	0	0	0.00880632	0.00757209	0	0.0172235	0.00796773	0.00772574
	B7HNW5	0	0	0	0	0	0.00782965	0	0	0	0	0.00669472	0	0	0.00703781	0	0	0	0
	B7HKB0	0	0	0	0	0	0	0	0	0	0.00685021	0	0	0.00742342	0	0	0	0	0
hup2	B7HR53	0.107671	0.15521	0.12448	0.108393	0.0969841	0.0955752	0.288057	0.258961	0.264991	0.161345	0.214518	0.128236	0.399649	0.343637	0.406474	0.403031	0.372892	0.273914
sdhB	B7HRF9	0.0609323	0.043119	0.0464933	0.0138017	0.012349	0.0121696	0.0133375	0.00976992	0.00562355	0.0586974	0.0728389	0.0593756	0.0381655	0.0546941	0.0365339	0.0622036	0.0613887	0.0818458
comI	B7HMX9	0	0	0	0	0	0	0	0	0	0	0.00612544	0.00699053	0	0.0193181	0.0071688	0.00732348	0.00677582	0
	B7HXF5	0	0	0	0	0	0	0	0	0	0	0	0	0.0158425	0.0136222	0.0113739	0.0619699	0.0788366	0.048645
	B7HRR9	0.0197376	0.00775965	0.0273826	0.0149024	0.0200008	0.0197102	0.0216019	0.0237355	0.00910807	0	0.0337063	0.0128222	0.00686822	0.0236225	0.0197238	0	0.00621418	0.00602545
	B7HLB9	0.036865	0.0144932	0.012786	0	0.0249045	0.036814	0.0134491	0	0	0	0	0	0	0	0	0.275984	0.197312	0.0675246
	B7HLR6	0	0	0	0	0	0	0	0	0	0.00508539	0	0.00514414	0.0275546	0.00473855	0.015826	0	0	0
	B7HVH3	0.118282	0.117361	0.130886	0.0659165	0.0722961	0.0824951	0.0534256	0.0406401	0.0207932	0.135647	0.125043	0.131726	0.101918	0.0943754	0.0863042	0.0958331	0.10108	0.111766
	B7HR95	0.0644792	0.0950604	0	0.0365128	0.147013	0.160975	0.176424	0.15508	0.133895	0.0776428	0.0275282	0.0471239	0.319731	0.231512	0.241628	0.362035	0.182706	0.206683
	B7HYF0	0.0121652	0.00286959	0.0202526	0	0	0.0121484	0.00266286	0.0117035	0.0168412	0.0164066	0.0290848	0.0189671	0.00253993	0.0043679	0.00243134	0	0.00229806	0.00445653
	B7HVA4	0	0	0	0.119562	0.0974256	0.0282383	0.167122	0.383125	0.621127	0.0290563	0.0241451	0.038577	0.0885591	0.0524571	0.0847731	0.0596594	0.0480756	0.058701
	B7HXS9	0.0359678	0.0282809	0.0523943	0.0407351	0.0534563	0.0574688	0.0498626	0.0346026	0.0398344	0.0415783	0.0429962	0.0420587	0.0550703	0.0516568	0.052716	0.0440619	0.0634151	0.0592931
	B7I0K8	0.0187969	0.0110848	0.0195582	0.0106442	0.0047619	0.0140782	0	0	0.0065055	0.036215	0.0280875	0.027475	0.0343397	0.0210906	0.0281757	0.0143918	0.0177541	0.00430372
	B7HQ70	0.0768004	0.0557417	0.0676168	0.080289	0.0718381	0.0530959	0.0646574	0.0497305	0.0408926	0.0967477	0.0756657	0.0748383	0.148014	0.12727	0.171204	0.138713	0.150659	0.113621
	B7HUJ4	0	0	0.00482782	0	0	0.00463348	0.00507817	0	0.00642338	0.00893945	0.0118855	0.00904273	0.0242187	0.0291542	0.0185467	0.0378937	0.0438249	0.0467433
rfbD	B7I0D0	0	0	0	0	0	0	0	0	0	0	0	0	0	0	0	0.00720406	0.00333266	0.00646289
	B7HV09	0.0102514	0.0120908	0.0106666	0	0	0.0307117	0.0112197	0	0.0141918	0.0197509	0	0.0199791	0.0214036	0.00920191	0.0102443	0	0	0
mutY	B7HU57	0	0	0.00285741	0	0	0	0	0	0	0	0.00234487	0	0	0	0	0	0	0
bfmbB	B7HNS3	0.0702983	0.0771935	0.0781899	0.0713798	0.0687794	0.0580974	0.0610202	0.0553867	0.0302026	0.0583793	0.0827932	0.077951	0.0455503	0.0456941	0.0460254	0.0395945	0.0435023	0.0488413
	B7HN66	0.0388556	0.0274964	0.0283005	0.0572074	0.0354364	0.0388018	0.0467784	0.0280356	0.0161373	0.0486596	0.0597193	0.0567944	0.0567876	0.0523165	0.0737742	0.0713994	0.0734	0.0711707
queE	B7HK65	0	0	0.0088625	0	0	0	0	0	0	0	0	0	0	0	0	0	0	0
	B7HS67	0.00926325	0	0.024096	0.0183593	0.0117335	0.011563	0.0152073	0.00556978	0	0.0379249	0.0435025	0.0203098	0.0314281	0.0270234	0.0347129	0.0165489	0.0240607	0.0233299
	B7HWE8	0.0160563	0.00946858	0.0208832	0.00909221	0.0081352	0.0120255	0.00439322	0	0	0.0193342	0.0239922	0.0195576	0.00419041	0.00720623	0.00802253	0.00409782	0.00758275	0.00735245
	B7HMT1	0	0	0	0.005691	0.00509199	0.00501802	0.00549962	0.0120856	0.0139129	0	0	0	0.0104915	0	0.00502147	0	0	0
	B7HND0	0	0	0	0	0.0377118	0.018582	0.0407307	0.0223768	0.0257601	0	0	0	0	0	0	0	0	0
prsA	B7HZH5	0.367131	0.341407	0.382	0.267866	0.246826	0.289068	0.193178	0.191032	0.117288	0.448884	0.409935	0.43687	0.339038	0.370738	0.402152	0.349565	0.330092	0.342698
katB	B7HZT0	0.145787	0.130775	0.155965	0.267432	0.235122	0.274767	0.262933	0.209887	0.173399	0.255166	0.229679	0.228101	0.214355	0.180626	0.190828	0.289273	0.287035	0.274557
ctaE	B7HMC6	0.00481734	0	0	0	0	0	0	0	0	0.00464065	0.00411335	0.00938854	0.0100579	0.00432415	0.00962796	0.00983571	0.0182003	0.0132357
	B7HMW9	0.0311487	0.0157447	0.0324102	0.0100792	0.00901832	0.00444366	0.00487013	0.00535115	0	0.0342929	0.0303963	0.0346891	0.0232265	0.031954	0.0177868	0.0181706	0.0210147	0.0285271
rny	B7HLB2	0.0860318	0.076101	0.101723	0.0730761	0.0792538	0.080055	0.049219	0.0376211	0.0378956	0.11113	0.103511	0.0895499	0.0816466	0.077224	0.0586171	0.0598819	0.0590974	0.0752096
	B7HK91	0.00866928	0.00681651	0.0120272	0.00327278	0.0029283	0.0144288	0.00316272	0.00347509	0	0.0278377	0.0172722	0.0168956	0.0150835	0.0103756	0.011551	0.00590011	0.00818832	0.00793963
	B7HLB3	0.172379	0.169423	0.127047	0.113882	0.058226	0.0860701	0.102192	0.0777357	0.0795458	0.207571	0.202383	0.195971	0.239936	0.264332	0.215323	0.19064	0.176384	0.19076
sasP1	B7HXL9	0.0988435	0.0971487	0.0685644	0.0186574	0.100162	0.0822556	0.05409	0.0594324	0	0	0	0	0.189174	0.147874	0.0658497	1.02588	0.840239	0.663846
	B7HLN2	0.0115883	0.0136675	0.0120576	0	0	0.0115723	0	0.0139356	0	0.0334899	0.00989483	0.0225845	0.0483896	0.0520096	0.0347407	0.0354903	0.0547271	0.042452
	B7HKT8	0.0333349	0.0262107	0.0539544	0.0629221	0.0525459	0.0480838	0.0364837	0.0311789	0.0102551	0.0535205	0.0569269	0.0469203	0.019333	0.0299222	0.0222078	0	0.0069968	0.0067843
	B7HRB0	0.019902	0.0234729	0.010354	0	0	0	0	0	0	0.019172	0.0368193	0.0355548	0.0103881	0.00893222	0.0132587	0	0.00313297	0.00911346
rpmG2	B7HPG6	0.331447	0.367922	0.182579	0.264973	0.197569	0.272579	0.042677	0.140676	0.107964	0.112691	0.0832383	0.15199	0.203534	0.175008	0.17535	0.159229	0.165737	0.124992
	B7HSU8	0.00610152	0.00719628	0	0.00691023	0	0.0121861	0.0133557	0.00733741	0	0.00587773	0.0104197	0.0178369	0.00636956	0	0.00609726	0	0.00576302	0
	B7HST3	0.00835567	0.00985488	0.00434704	0	0	0	0	0	0	0	0	0	0	0	0	0	0	0
	B7HMF9	0.00863765	0	0	0.0146738	0.0218821	0.00862569	0.0236338	0.0363554	0.0119578	0.0166417	0.0147507	0.016834	0.0360685	0.0620268	0.0431581	0.0220447	0.0285546	0.0395533
	B7HKY7	0	0	0.0110415	0	0	0	0	0	0	0.0153338	0.0135915	0.0103406	0.00553897	0.00476267	0.0159065	0	0.010023	0.00971862
	B7HR82	0	0	0	0	0	0	0	0	0	0	0	0	0	0.00125975	0	0.00429814	0.00795343	0.00385594
	B7HXR2	0.00532371	0	0	0.00602933	0.00539471	0.00531634	0.00582657	0	0	0.0102569	0.00909143	0.0051877	0.00555759	0.00477868	0.00531999	0	0	0.00487564
	B7HMR5	0.0588938	0.0472334	0.0686325	0.0373519	0.0334204	0.0517549	0.0180479	0.0141646	0.00326125	0.108929	0.124712	0.110187	0.0762366	0.0845831	0.0706233	0.0745521	0.0801022	0.103559
nos	B7HZC9	0	0	0.00291179	0	0	0	0	0	0	0	0	0	0	0	0	0	0	0.00256293
cotZ2	B7I0D7	0.00675836	0.00797098	0.00703207	0	0	0	0.00739674	0.0162546	0	0	0	0	0.0211658	0.0303323	0.0202609	0.11039	0.102135	0.105222
	B7HL86	0.0146583	0.0057628	0.007626	0.00645603	0.00247564	0.0032529	0	0	0	0.0109828	0.00973483	0.00872902	0.00340051	0.00438588	0.00244135	0.00166269	0.00153835	0.00223744
	B7HSM9	0.101091	0.108391	0.0956233	0.218573	0.307319	0.266145	0.331921	0.408911	0.368956	0.0531184	0.0549298	0.0626875	0.201471	0.23098	0.202042	0.253311	0.156245	0.193583
	B7HPG1	0	0	0	0.0112989	0.0151644	0.00498138	0.0109189	0.0119974	0.00690567	0	0.00425931	0	0	0.0044776	0.00498481	0.00509237	0.00471155	0.00456845
dnaN2	B7HTD1	0	0	0	0	0	0	0	0	0	0.0026485	0.00234755	0.0026791	0.00287012	0	0	0	0.00259681	0.00251794
	B7HT43	0	0	0.00771864	0	0	0	0	0	0	0	0.00316707	0	0	0	0	0	0	0
	B7HNR9	0.028562	0.0336867	0.0445781	0.0404347	0.0434144	0.057045	0.0312599	0.0429342	0.0197703	0.0481503	0.0609701	0.0626227	0.0819961	0.108961	0.0642197	0.0510264	0.0539549	0.0784743
	B7HUQ2	0.00786925	0	0.00818795	0	0.0159484	0.0157167	0.00861255	0.0094632	0.021788	0	0.00671926	0	0.00821496	0.0141272	0.00786376	0	0	0
murB	B7HVZ9	0.0170963	0.0120983	0.0249041	0.00774491	0.00346485	0.0102436	0.00374222	0.00822368	0	0.00988153	0.0175174	0.0233233	0.00356947	0.00613839	0.0102506	0.0104718	0.0129182	0.0125259
	B7HT11	0	0	0	0.0167808	0.00844569	0.00184956	0.00101353	0.0133637	0.00384605	0.00356838	0.00632582	0.00631681	0.0193349	0.0324188	0.0240608	0.0103992	0.0227418	0.0254436
purE	B7HS26	0.087406	0.0634392	0.0769542	0.0380735	0.0476925	0.0537139	0.0441517	0.0242563	0.0465396	0.0453386	0.0459278	0.0589659	0.0491324	0.060352	0.0470319	0.0480468	0.0381032	0.0431036
thiO	B7HWF2	0.0917767	0.0852829	0.107069	0.0535454	0.028182	0.0666543	0.0395695	0.0267555	0.0231006	0.075015	0.0617419	0.0514912	0.0319362	0.0374458	0.0361292	0.0255522	0.0236414	0.0331115
	B7HU88	0.0140918	0	0	0.00797981	0.00713989	0	0	0	0	0	0.00601625	0.00686591	0.00735546	0.00632457	0.007041	0	0.00665503	0
	B7HKS5	0.0214265	0.00947662	0.0167207	0.00909994	0.00542808	0.0160477	0.0029313	0.00644165	0.0037078	0.0258008	0.0388776	0.0287088	0.0195719	0.0192329	0.0214116	0.0218736	0.0303568	0.0367935
	B7I0M1	0.105386	0.109672	0.129004	0.0702082	0.0879457	0.117621	0.108555	0.104368	0.12873	0.244843	0.227609	0.247672	0.207088	0.217016	0.198235	0.208841	0.193223	0.210064
fabF	B7HZV1	0.0840573	0.0898449	0.0956611	0.0565241	0.0505746	0.0603325	0.0546233	0.0284297	0.0400012	0.096157	0.112146	0.0972679	0.0658125	0.0636623	0.0682489	0.0563135	0.0595455	0.0649541
murG	B7HPF3	0.00291027	0	0	0	0	0	0	0	0	0.00560706	0.00745491	0.00567184	0.00607624	0.0104493	0.00581648	0.00891297	0.0109953	0.023988
etfB	B7HRG6	0.215641	0.163156	0.211674	0.170495	0.177287	0.162522	0.142496	0.127213	0.123917	0.442899	0.399522	0.388545	0.327052	0.361563	0.313071	0.203526	0.24595	0.257111
	B7HQY4	0	0	0	0	0	0	0	0	0.00557495	0	0	0	0.00840792	0.0108443	0.0160969	0.0411107	0.0380364	0.0295049
metN	B7HUX6	0	0	0.00315178	0.00343059	0	0.00302491	0	0	0	0.002918	0	0.00295172	0	0	0	0	0.00286106	0.00277416
ilvB	B7HKC1	0.00926172	0.0043694	0.0134915	0.02937	0.0206475	0.0277467	0.0425735	0.0445509	0.0179504	0.0124908	0.0110715	0.00541506	0.0290058	0.0299287	0.0166595	0.00945496	0.00699832	0.0101787
aceA	B7HZQ5	0	0	0	0	0	0	0	0	0	0	0.00837406	0	0.0102381	0.00880322	0.00490021	0.0175208	0.0162106	0.0224546
	B7HX29	0.0800614	0.0553534	0.0976666	0.0406465	0.0363683	0.0523814	0.0332366	0.0232396	0.0229314	0.10372	0.0895771	0.0807063	0.0461123	0.0470839	0.044141	0.0281834	0.0365061	0.0404541
	B7HSH6	0.00319177	0.00376446	0.00332104	0.00361482	0	0	0.00349326	0	0	0.0122988	0.0109013	0.0155512	0.00999598	0.00573001	0.0127582	0.0097751	0.0090441	0.00876942
	B7HL40	0	0	0	0	0	0	0	0	0	0	0	0	0.0118071	0.0203047	0.0113024	0	0	0.00345278
	B7HRU2	0.0300126	0.0309729	0.0370833	0.0148709	0.0133056	0.0187319	0.0061589	0	0.00779039	0.0108419	0.01922	0.0127951	0	0	0	0	0	0
cysM	B7HQD1	0.0104092	0.0040923	0.00361027	0	0	0.00346494	0	0	0	0.00668497	0.0177761	0.00676221	0	0	0	0.00708428	0.00983176	0.00953315
rocF	B7HQY7	0.106796	0.075575	0.0963055	0.0645076	0.0613251	0.0639892	0.0662344	0.0385286	0.0147847	0.161178	0.139824	0.16304	0.100339	0.0830812	0.0996072	0.13083	0.124408	0.136931
	B7HVL4	0	0	0	0.00892916	0.00798931	0	0.0115052	0.0458255	0.0818599	0.0746841	0.0964919	0.129326	0.12483	0.18754	0.237673	0.0281703	0.0831556	0.169684
	B7HME3	0.00794095	0	0.00826256	0.00899348	0.00402343	0.00396498	0	0	0	0.0152994	0.0169512	0.0193452	0.00828981	0.00712797	0.00793541	0.0202666	0.0300016	0.0181815
ribT	B7HN38	0	0	0	0	0	0	0	0	0	0	0.0137569	0	0	0	0	0	0	0
	B7HYA4	0.030739	0.0271907	0.0426452	0.0116044	0.0207659	0.00255803	0.0112142	0.0123218	0.0106386	0.0345468	0.0262469	0.0249614	0.0294153	0.0390886	0.0511959	0.0444555	0.0556478	0.0563037
	B7I030	0.0268084	0.0126474	0.0371922	0	0	0.00356951	0.0136923	0.00429848	0.0024742	0.00516504	0.00152605	0.00174157	0.0653011	0.0754001	0.0660814	0.13319	0.150239	0.132582
	B7HXA5	0.0513266	0.0414192	0.0477837	0.0122378	0.0164246	0.0107906	0.0118263	0.00649716	0.00747951	0.0234209	0.00922649	0.0131619	0.0112803	0.00484967	0.00539903	0.0165466	0.00255153	0.00742211
alaS	B7HQE6	0.0918286	0.0985852	0.0845229	0.0746666	0.0680005	0.0717152	0.0463857	0.0453042	0.0228174	0.0805218	0.0814247	0.0722744	0.0589924	0.052838	0.0470587	0.049276	0.0433671	0.0560666
	B7HKE1	0	0	0	0.00359542	0.00321698	0.00317025	0.0277961	0.0477211	0.0791083	0	0	0	0	0	0	0	0	0
	B7HTD0	0	0	0	0	0	0	0	0	0	0	0.00579741	0	0.0070879	0.00609452	0	0	0.00641295	0
	B7HQQ0	0	0	0	0	0	0	0	0	0	0	0	0	0	0.00427167	0	0.0242908	0.0134846	0.0087167
	B7HRX1	0.0196935	0.0126693	0.0242167	0.00608284	0.00362839	0.00715136	0.00979712	0.0129177	0.0198278	0.0258698	0.0336311	0.0209349	0.0149517	0.00964217	0.0107344	0.00913836	0.010146	0.0147567
recD2	B7HQF2	0	0	0	0	0	0.00262223	0	0	0	0	0.00224213	0	0	0	0	0	0	0.00120243
	B7HPJ0	0.0220938	0.0104232	0.0183908	0.00500443	0.013433	0.00882527	0.00967226	0	0	0.01277	0.018865	0.0215293	0.00922574	0.0198318	0.00441567	0.00451095	0.0166944	0.0121405
	B7HPH6	0.00396819	0	0.0041289	0	0	0	0	0	0	0.0114679	0.0135532	0.00773363	0.00414252	0.00356194	0.00396542	0	0.00374804	0.00363421
	B7HL69	0	0	0.0086064	0.00936773	0.0167634	0.00825996	0.0090527	0.0298405	0.0229015	0.00796803	0.0141253	0.00806009	0.0172696	0.0593968	0.0247969	0.016888	0.0468752	0.030301
	B7HQR0	0.00254302	0	0.00264601	0	0	0	0	0	0	0.0048995	0.00434278	0.00495611	0.00265474	0	0	0.00259608	0.00720582	0.00698697
	B7HR12	0.00179088	0.0021122	0.00186341	0	0	0.0017884	0.00196004	0	0	0.00345038	0.00611665	0.00698049	0.00934776	0.00482259	0.00178963	0.0146259	0.0101491	0.00820074
pheT	B7HRK1	0.0817023	0.0825957	0.0836618	0.0690314	0.0617654	0.0699336	0.0255485	0.0296314	0.0125674	0.108689	0.101875	0.0998347	0.0636302	0.0686814	0.0557261	0.0556046	0.0649205	0.0712627
glgD	B7HTX7	0.00593257	0	0	0.0167972	0.0120234	0.00592436	0.00649294	0.00713424	0.00821291	0.00571498	0.0075984	0.0028905	0.00928979	0.0106504	0.0118569	0	0.00280172	0
	B7HW14	0.0488658	0.0336195	0.0423707	0.0230594	0.0206323	0.0365986	0.0311975	0.0244849	0.0112748	0.113761	0.121697	0.130948	0.106276	0.113313	0.122079	0.0623567	0.0615397	0.100694
	B7HUD7	0	0	0.0063384	0	0	0	0	0	0	0.00586826	0.00520147	0.00593606	0.00635931	0.00546804	0.0121749	0.00621879	0.00575374	0.00557899
qcrC	B7HL34	0.00406103	0	0.0042255	0	0.00411519	0	0.00444462	0.00488361	0.005622	0.00391208	0.0104027	0	0.00423944	0.00729054	0.00811639	0.0165831	0.0191787	0.0148769
	B7HU81	0.0304758	0.0431326	0.050736	0.0345151	0.0370586	0.042607	0.0333544	0.029319	0.00843799	0.0411012	0.0416354	0.0296972	0.0254517	0.0273557	0.0304545	0.0248893	0.034542	0.0334929
	B7HK54	0	0	0	0	0	0	0	0	0	0	0	0	0.010022	0.00861743	0.0143904	0.107807	0.104278	0.092319
	B7HL45	0.00867075	0	0.0180438	0	0.0175728	0.00865875	0.00948976	0	0	0.00835273	0.00740363	0.0253477	0.00905167	0.0233492	0.0086647	0.00885166	0.0163794	0.00794098
	B7HKF7	0	0	0	0	0	0	0	0	0	0.0161931	0.00478436	0.00546005	0.00584935	0	0.00559929	0	0	0
	B7HRI1	0.00252024	0.00297243	0.00524462	0.00285428	0.00255385	0.00251675	0.00275829	0	0	0.00485561	0.0107597	0.00491171	0.00789287	0.00678667	0.00755545	0.00257282	0.00476085	0.0115406
	B7HM50	0	0	0.0136233	0.00741421	0.00663382	0.00653745	0.0143297	0	0.00906284	0.031532	0.0391287	0.025517	0.0273364	0.0587629	0.0261678	0.0066831	0.0247333	0.0299776
hpt	B7HPX5	0.141965	0.160739	0.2068	0.212231	0.17263	0.187134	0.105654	0.122919	0.141504	0.185991	0.193949	0.221341	0.171914	0.142722	0.164564	0.0927531	0.107271	0.135217
	B7HLE7	0.0392907	0.0231702	0.061323	0.0111246	0.00995368	0.0490454	0.0107505	0.0118123	0.0135983	0.0567745	0.075485	0.038287	0.051271	0.0529023	0.0687108	0.0100276	0.0649442	0.0179919
	B7HXQ9	0.00543992	0.00320799	0	0	0	0	0	0	0	0	0	0	0	0	0	0	0	0
	B7HV03	0.0446157	0.0328881	0.0522255	0.0442131	0.0339081	0.0139231	0.024415	0.0167665	0.00772063	0.0429794	0.0500006	0.0434759	0.0203769	0.02503	0.0195058	0.03416	0.0395068	0.0383069
murE	B7HM35	0.0427059	0.0327395	0.048879	0.0120916	0.0129826	0.0170587	0.00934795	0.00513562	0.00295605	0.0267407	0.036465	0.0291304	0.022291	0.0210836	0.0298733	0.0217985	0.0221852	0.0312893
	B7HYA5	0	0	0	0	0	0	0	0	0	0.00139463	0.00123616	0.00141074	0	0.00389853	0	0.00147793	0.00410223	0.0066294
clpB	B7HZU5	0.0282526	0.0291566	0.0293969	0.0173319	0.0131218	0.018809	0.0115955	0.00990948	0.00488904	0.0306185	0.0402065	0.0275309	0.0393251	0.0348703	0.0294093	0.054079	0.0489229	0.0485152
pstB	B7HPG9	0	0	0	0	0	0	0	0.00450724	0	0	0.00640065	0	0.00391271	0.00672867	0.00374544	0	0	0.0068652
	B7HWW2	0.0133659	0.00315281	0.0139072	0.0121099	0.00541765	0.0106779	0.00585134	0	0	0.0154508	0.0228252	0.0182342	0.0279061	0.0311935	0.0213705	0.0163737	0.0252487	0.0244819
	B7HS00	0.00779082	0.00918868	0.00972762	0.00352938	0.00157894	0.00466802	0	0	0	0.00750507	0.0119741	0.00303671	0.00162662	0	0.00155708	0	0	0.00428107
	B7HXS2	0	0	0	0	0	0	0.00543105	0.0358048	0.0480881	0	0	0	0	0	0	0	0	0
	B7HS68	0.0146787	0.0173124	0	0.0498728	0.104121	0.0586336	0.0803261	0.105912	0.0812835	0	0	0	0.0306471	0.0527037	0.0586739	0.0299699	0.0277287	0.0268866
	B7HTC3	0	0	0	0	0	0	0	0	0	0.00630464	0.0111765	0	0	0.0117493	0.0130802	0	0.0061816	0
	B7HX85	0	0	0	0	0	0	0	0	0	0	0	0	0.00786758	0.0135298	0	0	0	0
	B7HWM2	0.0629289	0	0	0	0.015942	0.0785522	0.0344365	0	0	0	0	0	0.0164234	0.0141216	0	0.128484	0.118875	0.0432244
	B7HU72	0.0284818	0.0251941	0.0518618	0.0645138	0.0649387	0.0853271	0.0935163	0.102753	0.0985739	0.0411557	0.054719	0.0346927	0.0371663	0.0639147	0.0426929	0.021807	0.0336271	0.039127
	B7HT18	0.00280487	0	0	0	0	0	0	0	0	0	0	0.00273321	0	0.00251771	0.00280291	0	0.00529852	0.00513759
ribE	B7HNM7	0	0	0	0	0	0	0.00537727	0	0	0	0.00839037	0.00478767	0.00512903	0	0.00490976	0	0	0.00899934
	B7HZF5	0.00457233	0	0.0118938	0.00258918	0.00463331	0.006849	0.00500421	0	0	0.00880925	0.00780828	0.00668327	0.0023866	0.00205211	0	0.00466773	0.00215933	0.0041875
	B7HWK9	0	0	0	0	0	0	0	0	0	0.0410216	0.0409054	0.0259347	0.0250055	0.0310569	0.00797882	0.0489059	0.0502762	0.0219372
	B7HMV3	0	0	0	0	0	0	0	0	0	0	0.00285608	0.00325944	0	0	0	0	0.00315932	0.00306337
	B7HXS7	0	0	0	0	0	0.00744591	0.00816052	0	0	0	0	0	0.0155676	0.0133858	0.0149021	0.0076118	0.0281703	0.0136574
	B7HYH6	0.0531092	0.0521986	0.0583302	0.0434406	0.0328885	0.0294643	0.0193753	0.0177408	0.00408462	0.0909535	0.090696	0.0805038	0.0677629	0.0556174	0.0589691	0.0722898	0.0557365	0.0756612
	B7HVM4	0	0	0	0	0	0	0	0	0	0.0105872	0.00938423	0	0.0114731	0.00986516	0.0109827	0.00560982	0.0103806	0
	B7HMY2	0.0458877	0.0180404	0.0159154	0.0692931	0.0774995	0.0458242	0.0669629	0.0735767	0.0847012	0	0	0	0.0798394	0.0823797	0.061141	0.0624602	0.0577893	0.0560342
	B7HRV1	0	0	0	0	0	0	0	0	0	0.00319046	0.0084838	0.00322732	0	0.00297286	0.00330962	0	0.00312819	0.00303318
	B7HQ83	0.0154667	0	0.0241396	0.00875834	0	0	0	0	0	0.0074497	0.00660321	0.0150715	0.00807307	0.00694162	0.0231838	0.0157894	0.00730431	0.0212474
folP	B7HPY3	0.0112402	0.008838	0.0233909	0.0212168	0.0189836	0.0112247	0.0246039	0.00450567	0.00518691	0.010828	0.0191952	0.0146041	0.00391134	0.00672632	0.0112324	0	0	0.0034314
spoVFB	B7HLD5	0	0	0	0	0	0	0.0115659	0.0190625	0	0	0	0	0	0	0	0.237341	0.234565	0.227441
	B7HSN0	0	0	0	0	0	0	0	0	0	0	0.00530794	0	0	0	0	0	0	0.00569319
	B7HKF5	0.00244702	0	0.0178229	0.0110854	0.00247966	0.00733091	0.0348161	0.0529682	0.0948529	0	0	0	0	0	0	0	0	0
yhbH	B7HU84	0	0	0	0	0	0	0	0	0	0	0	0	0.00851117	0	0.00271577	0.0499387	0.0616055	0.0472898
	B7HT57	0.00105801	0	0.00110086	0	0	0	0	0	0	0.0020384	0.00271018	0.00103098	0	0	0	0.00216016	0.00399724	0.00096896
	B7HR35	0	0	0.0127475	0	0	0	0	0	0	0	0.0104609	0	0	0.0219941	0.0244855	0	0	0
	B7HL89	0.0228786	0.0269836	0.0238052	0.0518221	0.0695513	0.0571174	0.0500794	0.0412692	0.0158363	0	0.00976761	0	0.0238837	0.0205364	0.0114313	0.035034	0.0108047	0
mfd	B7HPW4	0.00171079	0	0.000890038	0.00193754	0.00173361	0.00256263	0.00187238	0.00102866	0.00118419	0.0140084	0.0182597	0.0100025	0.00625081	0.00844603	0.00512879	0.00436621	0.0040397	0.003917
	B7HMN7	0	0	0	0	0	0	0.00735393	0	0	0	0	0	0.00701444	0.0120627	0.00671456	0	0.00634648	0
	B7HQA3	0.160147	0.16666	0.117623	0.22405	0.391388	0.338666	0.402099	0.3965	0.417325	0.0090749	0.032175	0.036719	0.118011	0.109928	0.12238	0.153872	0.124569	0.146668
	B7HLJ2	0	0	0	0	0	0	0	0	0	0	0.00412339	0	0	0	0.00965147	0	0	0
	B7HNT2	0	0	0	0	0	0	0	0	0	0	0.00351884	0	0	0.00369918	0.00411821	0.00841414	0	0.0113227
	B7HYT6	0	0	0	0	0	0	0	0	0	0	0	0	0	0.0154753	0.00344565	0.04224	0.0521082	0.0442099
secE	B7HQS9	0	0	0	0	0	0	0	0	0	0.0166565	0.0147638	0	0.0180503	0.0155205	0.0172786	0.0176514	0.0163314	0.0158354
	B7HYF7	0.0112756	0.00443289	0.00782148	0.0255401	0.0152346	0.0337799	0.0123406	0.0135595	0.0104064	0.010862	0.00962778	0.007325	0	0.0101212	0	0	0	0.00688438
	B7I091	0.0475074	0.0840471	0.0247157	0.0538042	0.0722115	0.0711625	0.0519948	0.0428477	0.0493261	0	0	0.0115734	0.0247972	0.0106609	0.0237371	0.0242493	0.0336538	0
	B7HVA8	0	0	0	0	0	0	0	0	0	0	0.00214201	0	0.00523764	0.00675536	0.0100275	0.00768287	0.00710833	0.00918991
	B7HK82	0.00342634	0.00808221	0.00713021	0	0	0	0	0	0	0.009902	0.0175537	0.016694	0.0429223	0.02768	0.0273916	0.0489696	0.02589	0.0282417
	B7HT37	0	0	0	0	0	0	0.0074669	0.0164088	0	0	0	0	0	0	0	0.0626834	0.0644397	0.0562344
	B7HRU0	0.00650492	0	0	0	0	0	0	0	0	0	0	0	0.00679069	0.00583896	0	0.0796878	0.0798726	0.0834042
	B7HYP0	0	0	0	0	0	0	0	0	0	0	0	0	0.0601125	0.0413501	0.0460341	0.0470274	0.0543882	0.0421891
	B7HN61	0.0139886	0.00824924	0.0218327	0.023764	0.0141751	0.00698461	0.0153099	0.00841102	0.00968273	0.0202133	0.0179165	0.0204468	0.0146031	0.0125565	0.0209682	0.0214207	0.0132125	0.00640562
	B7HY40	0.0212483	0.0041768	0.0331633	0	0.00358862	0.0106095	0.0348831	0.0468459	0.039221	0.0034115	0.00302386	0	0.122	0.117617	0.0955508	0.0397681	0.0401391	0.0421633
	B7HY16	0	0	0	0	0	0	0	0	0	0	0	0	0	0	0	0.00559638	0.00517787	0.0025103
	B7HLZ9	0	0	0	0	0	0	0	0	0	0	0	0	0	0	0	0	0.0025705	0.00498487
resB	B7HKY3	0	0	0	0	0	0	0	0	0	0.0017715	0.00314042	0.00179197	0.00191973	0	0.00183766	0.00375463	0.00347385	0.00168417
	B7HQ57	0	0	0	0	0	0	0	0	0	0	0	0	0	0	0.00334217	0.00341429	0.00315896	0.00306302
cwlJ2	B7HYF1	0	0	0	0	0	0	0	0	0	0	0	0	0	0	0	0.0797223	0.067055	0.0325092
	B7HZX4	0	0	0	0	0	0.00874325	0.00958237	0.0105288	0	0	0	0	0	0	0	0.0446902	0.0330786	0.0481109
	B7HTX2	0.0328591	0.0290661	0.0470111	0.0325626	0.024973	0.0205085	0.0134861	0.0246968	0.0170585	0.0514377	0.0385786	0.0480295	0.0214392	0.0368688	0.0328362	0.0251585	0.0543133	0.0564254
inhA	B7HW94	0.103072	0.112333	0.0651625	0.18175	0.134856	0.118564	0.225616	0.37185	0.565345	0.0904938	0.0958079	0.128409	0.0354128	0.0222516	0.0247722	0	0	0.00477961
	B7HKE0	0	0	0	0	0	0.0044353	0	0	0	0.00427854	0.00379238	0	0.00927313	0.00797348	0.00887669	0.00906823	0.0125851	0.00406763
	B7HKX7	0.00317341	0	0	0	0	0	0.00347316	0.0038162	0	0	0	0	0.00662564	0.00854556	0.00634239	0.0356358	0.0419629	0.0319695
	B7HY62	0	0	0	0	0	0	0	0	0	0	0.00328131	0	0	0	0	0	0.0036297	0.00351946
	B7HR86	0.00596592	0	0.00620754	0.00675666	0.00604549	0	0.00652944	0	0	0.00574711	0.0203763	0.00581351	0.024912	0.0321308	0.0298088	0.0060904	0.0281747	0.0327828
sufB	B7HUW8	0.128945	0.162391	0.140989	0.126234	0.117376	0.148408	0.0885017	0.0604483	0.048409	0.267379	0.218336	0.223615	0.148298	0.14517	0.157246	0.118248	0.136241	0.136106
cysC	B7HKE7	0	0	0	0	0	0	0	0	0	0.0343481	0.0391438	0.0248178	0.00531747	0.0182889	0.0203606	0.0103999	0.0192444	0.0326549
	B7HZ40	0	0	0	0	0	0	0	0	0	0	0	0	0	0	0.00555748	0.0113548	0.00525283	0.0101866
ilvA	B7HMM8	0	0	0.00254602	0.00554249	0.00247955	0	0.0053561	0	0	0.00235717	0.00208933	0	0.00255442	0.00219641	0.00244521	0	0	0
ssuB	B7HUM8	0	0	0	0	0	0	0	0	0	0.00387212	0.00343214	0.00391686	0	0	0	0	0	0
	B7HSG0	0	0	0	0	0	0	0	0	0	0	0	0	0	0.00875578	0.0048738	0.0149369	0.0138199	0.0134002
odhB	B7I0H1	0.0937903	0.10165	0.0949513	0.0660297	0.0616483	0.05569	0.0527119	0.0365799	0.0386014	0.105002	0.0865774	0.0963345	0.0820333	0.0637101	0.0734601	0.0698696	0.0646446	0.0603597
mnmG	B7HZG9	0.0506107	0.0558404	0.0526604	0.0203389	0.0281244	0.0293462	0.0214418	0.00981647	0.00452028	0.0644817	0.0627308	0.0588631	0.0426081	0.0498257	0.0342607	0.0316667	0.0416348	0.0418655
	B7HTA7	0	0	0.00395719	0	0	0	0	0	0	0.0146547	0.00974214	0.011118	0.00397024	0.00682761	0	0.00388251	0.00359217	0.00348307
	B7HXM2	0	0	0	0	0	0	0	0	0	0	0	0	0	0	0	0.00287377	0.0079766	0.00773434
	B7HZW9	0.0135694	0.00800204	0.0105892	0.0153679	0.0137504	0.0135506	0.0148511	0.00815897	0.00469629	0.0457509	0.043449	0.0462795	0.0389552	0.0395856	0.0338998	0.0380944	0.0352456	0.0403888
ptsH2	B7HW80	0	0	0	0	0.0132201	0.013028	0.0428351	0.0313773	0.0180607	0	0	0	0.0408576	0.0468418	0.013037	0.0133183	0.0123223	0.0238961
	B7HRI8	0.0035317	0	0.00734946	0.0239988	0.0071576	0.0176341	0	0.00849412	0.0195568	0.0136087	0.0422182	0.00688295	0	0.00317013	0.00705847	0	0.00667154	0.00323446
	B7HQ06	0	0	0	0	0	0	0	0	0	0	0.000598476	0	0.000731696	0	0	0	0	0
	B7HMJ7	0.0896303	0.128917	0.118281	0.195593	0.152853	0.185562	0.222511	0.249746	0.266323	0.0421185	0.0447992	0.0426051	0.0867214	0.0686803	0.0961215	0.0937321	0.0991115	0.122129
	B7HRP2	0.00461758	0	0.00480459	0	0	0	0	0	0	0.0133447	0.0197139	0.0134988	0	0.0124345	0.00922872	0	0	0.00422895
	B7HSI0	0	0	0.00200873	0	0	0.00192787	0	0	0	0.0055792	0.00824209	0.00188122	0.00604606	0.0138632	0.00578758	0.00197082	0.0145875	0.0194487
abrB	B7HPU8	0.295358	0.412862	0.227644	0.235393	0.288212	0.229405	0.215504	0.15786	0.15144	0.147532	0.121427	0.170556	0.114198	0.117831	0.131179	0.100507	0.0826585	0.0701295
coaA	B7HUL0	0	0	0	0	0	0	0	0	0	0.0110279	0	0.00371842	0	0	0	0	0	0
yqiS	B7HNS9	0.101679	0.0856591	0.143582	0.0863669	0.0772763	0.105165	0.0755137	0.0655042	0.0251361	0.139928	0.139532	0.134468	0.0682366	0.0651924	0.0580617	0.0815575	0.0617388	0.096447
	B7HYX4	0.0117787	0.00926143	0.00817052	0.0088933	0.00795723	0.00784163	0.00859422	0.00944306	0.0108708	0.00756449	0.00670496	0.00765189	0.00409874	0.00704858	0	0.00801634	0	0.0035958
truB	B7HLE3	0.00662197	0.00390506	0.0103352	0.00374983	0	0.0066128	0	0	0	0.00956864	0.0310984	0.0129056	0.00345644	0.00297201	0	0.00338007	0.0031273	0.00909695
	B7HNC6	0.0159114	0	0	0	0	0	0	0	0	0	0	0	0	0.0142825	0	0.0812171	0.150287	0.102006
	B7HPE6	0	0	0	0	0	0	0	0	0	0.00224376	0.00795524	0.00907875	0	0.00209074	0.00232757	0	0.00219997	0.00426632
mmgE	B7HR27	0.08169	0.0659218	0.10513	0.0170427	0.0174273	0.0257611	0.0258807	0.0206814	0.00595209	0.130466	0.113806	0.115215	0.0964996	0.100342	0.0966706	0.0987565	0.113707	0.126004
	B7HZ89	0.00677283	0.00266268	0.00469809	0	0.00228772	0.00225449	0.00247086	0	0	0.00217481	0.00578307	0	0	0	0	0	0	0
	B7HZ63	0	0	0	0	0	0	0	0.00761739	0.00876912	0	0	0	0.0198379	0.0113717	0.0189898	0.00646651	0.00598293	0.0174036
	B7HXA7	0.0205429	0.0242288	0.0244284	0.00664736	0.00594768	0.00879192	0	0	0	0	0.0075175	0.00285973	0	0	0	0	0	0
	B7HUS0	0.0440232	0.0407959	0.0687092	0.0534195	0.0605425	0.0533827	0.0481815	0.0529403	0.0348255	0.0908754	0.102029	0.0827328	0.0886317	0.0931453	0.106839	0.0674126	0.0712815	0.080636
msrAB	B7HZC1	0.00311393	0	0.0129602	0	0	0	0	0	0	0.0179983	0.0186121	0.0121375	0.00650146	0.0083854	0.00933527	0.0127156	0.00882353	0.0342222
pepQ1	B7HNW1	0.0653799	0.0701006	0.0803965	0.0639485	0.0572175	0.0682572	0.0650505	0.0428853	0.0493694	0.0744333	0.0862758	0.0868768	0.0465356	0.0400135	0.0415764	0.0394397	0.0336833	0.0408254
holA	B7HPM2	0.00297462	0	0.0030951	0	0	0	0	0	0	0.00286552	0.00253992	0	0	0	0	0	0	0
pepF	B7HZE4	0.0148772	0.0155969	0.0189197	0.0131048	0.0167507	0.0115551	0.0126641	0.0119271	0	0.0652882	0.0691613	0.0612101	0.0414154	0.063803	0.0446005	0.0405003	0.0374716	0.059042
spo0A	B7HNT4	0.0411369	0.0352858	0.0389118	0.084708	0.0530544	0.0746909	0.0736734	0.0539666	0.0310631	0.165718	0.114956	0.102037	0.234241	0.147702	0.179381	0.114532	0.0741773	0.0924742
	B7HNJ1	0	0	0	0	0	0	0	0	0	0	0.00435846	0	0	0	0	0.00521091	0	0
dltD2	B7HUF4	0	0	0.00261364	0	0	0	0	0	0	0	0.00428965	0	0	0	0	0	0	0
	B7HTH5	0.013277	0	0.0331552	0	0	0.00530343	0.00871863	0.00638651	0	0	0	0	0.0526689	0.0429037	0.034496	0.116564	0.0927988	0.0851165
	B7HL75	0.0106483	0.0188383	0.024929	0.00602984	0	0.00531679	0	0	0	0.00769333	0.0181844	0.0155644	0.00277903	0.00955817	0.00532044	0.00543525	0.012572	0.00487606
	B7HKH7	0.0287485	0.0395578	0.0697966	0.00542649	0.00485532	0	0.005244	0	0	0.0184627	0.0204561	0.0280141	0.00500192	0.00430089	0.00478808	0.00489139	0	0.00438816
	B7HUR3	0.0644076	0.0464224	0.063293	0.0405247	0.0308203	0.0500255	0.0372038	0.0258179	0.0123839	0.0603218	0.0656888	0.0610187	0.0298832	0.024089	0.012515	0.0109586	0.0253477	0.0294934
	B7HXD0	0.0413386	0.0335196	0.0403245	0.0351133	0.0340356	0.030961	0.0424156	0.0621399	0.0929959	0.0323557	0.0330914	0.0276942	0.0080915	0.0115958	0.00516372	0.00791271	0.00976131	0.00709863
sinR	B7I0I8	0.0185697	0.0219016	0.0386435	0.042062	0.0470434	0.037088	0.0304856	0.0558277	0.051415	0.0268329	0.023784	0.0271429	0.0290782	0.0250029	0.0463919	0.0189572	0.0263092	0.0170068
	B7HQF9	0.012098	0.00951245	0.0335679	0.00456717	0.00408645	0.00402708	0	0	0	0.0194238	0.0413201	0.0157186	0.00420982	0.00723962	0.00402985	0	0	0.00369326
	B7HXL8	0.00419369	0	0.00436354	0	0	0	0	0	0	0.00807976	0.0107425	0	0	0	0	0	0	0.00384073
	B7HYV4	0	0	0	0	0	0	0	0	0	0.0037133	0.00438849	0.0037562	0.00134134	0.00346004	0	0.0052468	0.00485444	0.00588375
	B7HXB8	0	0	0	0	0	0	0	0	0	0	0.00420641	0	0	0	0	0	0	0
	B7HVI3	0.218044	0.250399	0.259712	0.337923	0.267468	0.277907	0.263759	0.210458	0.206532	0.196228	0.176381	0.173333	0.137772	0.126188	0.123281	0.143514	0.124652	0.110356
	B7HW68	0.0437441	0.0328318	0.0579291	0.054046	0.0483573	0.0555973	0.0391713	0.0286935	0.0220212	0.0919412	0.0780985	0.100754	0.0954832	0.0963794	0.0953751	0.0730748	0.0676101	0.0728408
	B7HT74	0.0194195	0.0343557	0.0404119	0.0549835	0.0983923	0.0969629	0.0212538	0.0116765	0.0134419	0.0187072	0.0165816	0.05677	0.0101363	0.026147	0.0194059	0.00991232	0	0.00889252
	B7HZS4	0.00679831	0.00400905	0.00353682	0	0	0	0	0	0	0.0294703	0.0290241	0.0198739	0.0212909	0.0152558	0.0203807	0.0208205	0.0417375	0.046696
	B7HNH4	0.00513503	0	0.016029	0.0116313	0.010407	0	0	0	0	0.0148401	0.0175384	0.0200154	0	0.00921864	0	0	0	0.00940569
glyS	B7HUQ7	0.0844145	0.091902	0.0900854	0.05393	0.0504469	0.0605214	0.0450096	0.0312348	0.0209751	0.0834035	0.0776229	0.0801488	0.0497104	0.0427434	0.0432593	0.0596602	0.0695094	0.0733452
parE	B7I046	0.0125763	0.0129787	0.0130856	0.0035608	0.00796502	0.00784931	0.00344106	0.00189046	0	0.0166582	0.0161077	0.0137869	0.0065644	0.00846658	0.00314188	0.00320968	0.00296965	0.00287946
	B7HRF4	0.0185289	0.0043707	0.0115676	0.00839393	0	0.00740131	0.00405582	0.00891282	0.0102604	0.0107096	0.00632847	0.00361111	0.00386859	0	0.0037032	0.00378311	0.00700039	0
	B7HL78	0.0796846	0.0595984	0.0829119	0.0528271	0.0551445	0.0621068	0.040415	0.0327208	0.018834	0.131057	0.124463	0.0946938	0.0770986	0.066293	0.0699182	0.051586	0.0550712	0.0676382
ftsH	B7HPX6	0.139086	0.138953	0.153232	0.131576	0.116069	0.142161	0.118197	0.100355	0.0792842	0.189155	0.15369	0.149883	0.145196	0.127784	0.124272	0.15034	0.142188	0.161847
	B7HR94	0	0	0.0112235	0	0	0	0	0	0	0.00519552	0.00460516	0.00525554	0.0112605	0.00968234	0.0161687	0.0165176	0.0152824	0.00987881
	B7HUV2	0	0	0	0	0	0	0.014635	0	0	0	0	0	0	0	0	0	0	0
yajC	B7HQH5	0.0958773	0.0989451	0.0748202	0.176451	0.157879	0.143617	0.104934	0.0720611	0.0165913	0.103906	0.133032	0.116785	0.237712	0.236669	0.22755	0.244694	0.350913	0.296352
ogt1	B7HNI2	0.0136302	0	0	0	0	0	0	0	0	0	0.0116384	0	0	0	0.0136207	0	0	0.00624153
	B7HQ26	0	0	0	0	0	0	0.00564188	0.00619912	0.0285456	0	0	0	0	0	0	0	0	0
	B7HXN1	0.00878348	0.00828757	0.0109671	0.0139267	0.0106808	0.0192969	0.0230715	0.0232378	0.0316151	0	0	0	0	0	0	0	0	0
ctaD	B7HMC7	0	0	0	0.001889	0.00169017	0.00166562	0.00365094	0.00200577	0	0.00482025	0.00284836	0.00487594	0.0034824	0.0044915	0.00500028	0.00510817	0.00945235	0.0106928
	B7HXU7	0.0298188	0.0703381	0.0155132	0.0168855	0.0453247	0.0744438	0.0652708	0.0717175	0.103201	0	0	0	0.0155644	0.013383	0.014899	0.030441	0.0281645	0.0136546
	B7I085	0	0	0	0	0	0	0	0	0	0	0.00325184	0	0.00397569	0	0	0	0.0035971	0.00348785
	B7HQ00	0.0718662	0.0339043	0.044866	0.0651132	0.0873895	0.0789434	0.0865198	0.0691384	0.0994899	0.0623073	0.079773	0.0700302	0.0600187	0.103214	0.0646344	0.0733656	0.0882429	0.0855629
	B7HL87	0	0	0	0	0	0	0	0	0	0	0	0	0	0	0	0.0243199	0	0
	B7HLL0	0	0	0	0	0	0	0	0	0	0.00527829	0.00467853	0	0.0285998	0.0295098	0.0328526	0.0223743	0.0258764	0.0200724
	B7HVC0	0.0379117	0.0298093	0.0361599	0.00357806	0.00320144	0.00315494	0.00345773	0	0	0.0121737	0.0404643	0.0184716	0.0032981	0.00567173	0.00631421	0.00322523	0.00596808	0.0173605
	B7HVH2	0.00768278	0.00181225	0.00639515	0.00522065	0.0031141	0.00767215	0.0117719	0.0295647	0.0595609	0	0	0.0014973	0	0	0	0	0	0
	B7HP03	0.0102039	0	0.00530856	0	0.00516997	0	0	0	0	0.00982961	0.0087127	0	0.00532607	0	0.00509837	0.00520838	0.00481889	0
	B7HNZ4	0	0	0	0	0.0239937	0.0236452	0	0	0	0	0	0	0	0	0	0.0966879	0.111822	0.0867404
	B7HRF3	0.00349937	0.00412724	0.00728218	0.00396319	0.00354604	0	0.00382991	0	0	0.00337102	0.00896394	0	0.0036531	0.00314111	0.00349693	0.00357238	0.00661046	0.0192291
	B7HKA8	0.0214443	0.012646	0.0334693	0.0121433	0.0380281	0.0374757	0.0234699	0.032235	0.0371088	0.0413156	0.0457763	0.0365689	0.0503695	0.062559	0.0589308	0.0383106	0.045573	0.0540086
	B7HR63	0.0171006	0.0201688	0.0177931	0.00484178	0.00433216	0.00853845	0.00467896	0.00514109	0	0.0164734	0.0182519	0.0374933	0.00892591	0.0191873	0.0213608	0.00436434	0.0161519	0.0156613
	B7HL02	0	0	0	0	0	0	0	0	0	0	0	0	0	0	0	0.00583275	0	0.00523267
proC	B7HRU5	0.0156515	0.00922986	0.0203567	0.00886299	0.0198253	0.0156298	0.0128474	0	0	0.0113081	0.0167053	0.0114387	0.00408476	0.00702455	0.00391014	0	0	0
gudB	B7HKZ9	0.0748354	0.0797212	0.0728426	0.0218721	0.0171237	0.0216963	0.0211365	0.0116121	0.0167097	0.0883692	0.0721442	0.082333	0.0403216	0.0476718	0.0410101	0.0394306	0.0433223	0.05085
	B7HP90	0	0	0	0	0	0	0	0	0	0.0049444	0.00876516	0.00500153	0.00535814	0	0	0.00523974	0	0
	B7HX52	0	0	0	0	0	0	0.00809955	0	0	0	0	0	0.00193141	0.00166072	0	0	0.00174749	0.00169442
ahpC	B7HT24	0.598535	0.581736	0.588177	0.746909	0.780611	0.741599	0.70966	0.713107	0.560071	0.726067	0.714547	0.702053	0.856248	0.930253	1.00794	0.769437	0.827057	0.847618
ilvN	B7HKC2	0.00605079	0	0	0.00685279	0.012263	0.00604242	0.0264893	0.0218292	0.00837658	0	0.00516655	0	0.00631661	0.00543133	0.0120931	0	0.0114302	0.00554153
	B7HQE3	0.0108131	0	0.0112511	0	0.0109573	0	0	0	0	0	0	0	0.0225763	0.0291183	0.0324168	0.0331162	0.040853	0.0495153
	B7HLN7	0.00553689	0	0.0345668	0.0376246	0.0504966	0.0331754	0.0605989	0.0865594	0.0766515	0.0320029	0.0425497	0.0431635	0.0924821	0.0745505	0.0995945	0.0565241	0.0470674	0.0659215
	B7HL29	0.00948392	0.013982	0.022203	0.00537048	0.0048052	0.0047354	0.00259494	0.00285123	0.00328233	0.0251242	0.0182204	0.0231041	0.00990056	0.0234107	0.0165853	0.0121023	0.020155	0.0217143
	B7HMJ0	0.00688639	0.00812198	0.0358264	0.0857905	0.0767606	0.0756455	0.052758	0.0662501	0.0572002	0.0132676	0	0.0268418	0.0575114	0.0432696	0.0412895	0.0210902	0.019513	0.031534
	B7I0C3	0	0	0	0	0	0	0	0	0	0	0	0	0.00563086	0	0.00269507	0.024779	0.0203786	0.0172897
	B7HR33	0.0582042	0.0583503	0.0787299	0.0692147	0.0501334	0.0610298	0.0414063	0.0489956	0.024173	0.12896	0.126731	0.153136	0.12456	0.120164	0.113419	0.083186	0.0852115	0.0906193
	B7HUB3	0.0227531	0.0348863	0.0473492	0.0824605	0.0714754	0.0795257	0.117041	0.109447	0.125996	0.015343	0.0213708	0.00886873	0.0546312	0.0633135	0.0864015	0.0511013	0.0537271	0.0833525
	B7HK76	0.0497214	0.0544539	0.0591259	0.0804453	0.0575823	0.0602924	0.0816269	0.0854182	0.0442499	0.0581616	0.0363902	0.0484512	0.0704435	0.0541948	0.0496867	0.0435076	0.0570265	0.0520419
	B7HZV6	0.0465027	0.0438771	0.0464506	0.0189599	0.022619	0.0222904	0.00814322	0.00671064	0.0154505	0.0197107	0.028589	0.0362517	0	0	0	0	0	0
spoVK	B7HKR5	0	0	0	0	0	0	0	0	0	0	0	0	0	0	0	0	0.00590316	0.00572387
alo	B7HXW4	0.0123398	0.0218308	0.0149795	0.128108	0.06669	0.0636674	0.209334	0.403134	0.646305	0	0	0	0.00214699	0.00184608	0	0	0	0
	B7I031	0.00179417	0.00211608	0.00933415	0	0	0	0.00589092	0.00215758	0.0024838	0.00518509	0.00459592	0	0.00187299	0.00644194	0	0.0036632	0.00677852	0.0115021
	B7HMW3	0.0414898	0.0440407	0.0302191	0.0751825	0.0588604	0.0414324	0.0590315	0.0548832	0.0459501	0.0599521	0.0637679	0.0687308	0.0779626	0.0558633	0.09536	0.0762399	0.0587821	0.0645964
	B7HQ62	0.0499494	0.0257738	0.0194896	0.00353562	0.00316347	0.00935255	0.00341672	0	0	0.0421027	0.0319875	0.0152104	0.0358488	0.0224179	0.0374359	0.0223088	0.0265378	0.03145
	B7HYA3	0.0403443	0.0173029	0.0496107	0.0290765	0.0297326	0.0219755	0.0321128	0.0264634	0.0101549	0.049464	0.0532386	0.0428876	0.0574319	0.0526748	0.0842975	0.0823722	0.100462	0.0873335
	B7HP34	0	0	0	0	0	0	0	0	0	0.00236395	0	0	0	0	0	0.00250515	0	0.00224742
	B7HPS9	0.208227	0.188914	0.191661	0.154194	0.129849	0.143958	0.0701216	0.0481547	0.0443484	0.12344	0.157282	0.202907	0.167211	0.17972	0.160063	0.163517	0.13616	0.117355
yabP	B7HPW9	0	0	0	0	0	0	0	0	0	0	0	0	0	0.0265042	0.0295066	0.0703342	0.0371854	0.027042
	B7HZY8	0.0036335	0	0.00378066	0.0082302	0.00368196	0	0	0	0	0.0105007	0.01241	0.00708135	0	0.00652302	0	0	0.00343192	0.0133108
	B7HXL6	0.0236978	0.0139749	0.020548	0	0	0.00394417	0	0	0	0.0190239	0.030352	0.0269411	0.00412314	0.0106358	0.00394688	0.0201602	0.0373051	0.0325549
pykA1	B7HXZ5	0	0	0	0	0	0	0	0	0	0	0	0	0	0.00532218	0.00592506	0.00302645	0.0196009	0.0108603
	B7I0L7	0	0	0	0	0	0	0	0	0	0	0	0	0	0	0	0.0361545	0.0836269	0.0486522
	B7HQ79	0	0	0	0	0	0	0	0	0	0	0	0	0	0.0132141	0.00490363	0	0.0139045	0.00898812
rnj	B7HMU8	0.076133	0.0657023	0.102402	0.0715027	0.0526867	0.0667559	0.0447106	0.0245633	0.0154239	0.105539	0.110988	0.115806	0.0814161	0.0783394	0.0742242	0.0625563	0.0684015	0.0867314
	B7HNA3	0.00176789	0	0	0	0	0	0	0	0	0.00170305	0	0	0	0.0015869	0	0.00180478	0	0
	B7HLB1	0.0236734	0.018614	0.0205268	0.00893707	0	0.00394011	0	0	0	0.0304069	0.0370588	0.0307582	0.0164756	0.0141665	0.0197141	0.0120837	0.00372668	0.014454
	B7HY80	0.170734	0.209113	0.20498	0.297484	0.259517	0.255747	0.265918	0.244802	0.263633	0.297316	0.263532	0.287953	0.322194	0.312405	0.321544	0.39552	0.328727	0.336786
spoIIAA	B7HN54	0.0270336	0	0.0468808	0.234728	0.301336	0.21597	0.502981	0.509314	0.474046	0.086807	0.0538603	0.0702479	0.45154	0.436787	0.486265	0.377168	0.374496	0.280595
yugI	B7HTY8	0.00901049	0	0	0.0102048	0.027392	0.026994	0.00986159	0	0	0	0	0	0.00940633	0	0.0090042	0	0	0
	B7HTZ6	0	0	0.00187561	0	0	0	0	0	0	0.00173649	0.0061567	0.00526965	0	0.00161806	0.00180134	0	0	0.00330177
	B7HTC5	0	0	0	0	0	0	0	0	0	0.00285073	0.00505362	0	0	0	0	0	0	0
bacF	B7HR48	0.0518008	0.00252459	0.00489988	0.0620606	0.0616017	0.0243682	0.0374834	0.0025741	0.00414862	0.0358791	0.0347266	0.0367108	0.0241333	0.0234409	0.0106952	0.0104889	0.00849146	0.00784148
	B7HRJ4	0.0017763	0	0.00739295	0	0	0.00177384	0.00194408	0	0	0.0102669	0.0273008	0.00865459	0.00927166	0.0111611	0.0106503	0.0126935	0.0167775	0.0178948
	B7HLE8	0.0891635	0.0262904	0.0463873	0.0631135	0.0338822	0.10017	0.0487928	0.040209	0.0154295	0.0644199	0.0666167	0.0325821	0.0698104	0.120053	0.100239	0.0796459	0.105271	0.0816591
	B7HLJ5	0.00155078	0	0.00161358	0.00175632	0.00157146	0.00154863	0	0	0	0.0044817	0.00662075	0.00302232	0.00323781	0.00417604	0.0015497	0.00316627	0.00439423	0.00284051
	B7HVA1	0.0102185	0.0168727	0.0170117	0.0115728	0.00828379	0.00816345	0.00223673	0.00245765	0	0.0354372	0.0488609	0.0298722	0.0341356	0.0293514	0.0245072	0.031295	0.0328153	0.0393054
	B7HZQ6	0.0149447	0.00440652	0.00388748	0	0	0.00373099	0	0	0	0.00719826	0.0223312	0.0400479	0.0234018	0.0167683	0.0186678	0	0	0.00684343
	B7HZA6	0.00206894	0	0	0	0	0	0	0	0	0.00597917	0.00706636	0.00604825	0.00215983	0	0	0	0.00390832	0.00568443
	B7HRL1	0.0476677	0.0351378	0.0433985	0.0539858	0.0422655	0.0595022	0.0195638	0.00716538	0.0164975	0.0688791	0.0712279	0.0580624	0.0497618	0.0641814	0.0595431	0.0364967	0.0393953	0.0491128
cdd2	B7HPK0	0.00797171	0.00940203	0.0248837	0.0361132	0.0323121	0.0318427	0.0174494	0.00958642	0.0110359	0.0307173	0.0136135	0.0310722	0.0332877	0.0357779	0.0238984	0.0162761	0.0301178	0.0146016
bcP	B7HU71	0.013151	0	0.0136836	0.014894	0.0199895	0.0131328	0.0143932	0.00790737	0	0.0253372	0.0449164	0.0384449	0.0480504	0.0531206	0.0328544	0.020138	0.0186321	0.0180662
tsaD	B7HRZ9	0.00319257	0	0.00332187	0.00361572	0.00323515	0.0063763	0.00698826	0	0	0.00307547	0.0109041	0.00311101	0	0	0	0	0	0
pheA	B7HQJ2	0.0145379	0.00428658	0.0264716	0.0288134	0.0147318	0.0108883	0.0119333	0.00437065	0.010063	0.00700233	0.00310334	0.0106248	0	0	0	0	0	0
ptsG	B7HN28	0.0247814	0.00548021	0.0273966	0.0070165	0.00470848	0.00464008	0.00339027	0.00558768	0	0.0238725	0.0238049	0.0181112	0.0113181	0.0111222	0.00619102	0.0158115	0.0190178	0.0241141
qcrB	B7HL33	0	0	0	0	0	0	0	0	0	0	0	0	0	0.00803245	0.00447117	0.0137029	0.0126782	0.0163909
ccpA	B7HSL3	0.0870079	0.0769645	0.113165	0.059828	0.0629774	0.0806813	0.0510142	0.026158	0.0387167	0.0778298	0.0875594	0.078729	0.0389273	0.0502073	0.0496841	0.0380671	0.0557656	0.0626096
	B7HKI6	0.00552608	0	0.00574989	0.00312926	0.00279989	0.00275922	0	0.00332271	0	0.0212936	0.0330296	0.0215396	0.0115377	0.0124008	0.0138056	0.0112828	0.0260975	0.0253049
	B7HL88	0	0	0	0	0	0	0	0	0	0.00647277	0.0114746	0.00654755	0.0140288	0.0120626	0.00671452	0	0	0
rfbB	B7I0C9	0	0	0.00646518	0	0	0	0	0	0	0	0	0	0.0064865	0.0139435	0.0124184	0.0253727	0.0469505	0.0540605
	B7HYH7	0.140226	0.18635	0.1644	0.295255	0.256173	0.272174	0.34585	0.327758	0.42106	0.0437591	0.0387869	0.0481138	0.0597914	0.0691396	0.0789452	0.0483892	0.0522323	0.0614986
nusG	B7HQT0	0.0566469	0.0267243	0.0589411	0.025662	0.022961	0.0282842	0.024799	0.0204363	0.00784207	0.0763969	0.106411	0.0938395	0.0413948	0.061017	0.0452859	0.0462631	0.0481538	0.0466913
galE2	B7HZD9	0.030649	0.0180741	0.0318903	0.0277691	0.0186347	0.0153033	0.0134176	0.0147429	0.00848597	0.0649548	0.0680422	0.0507723	0.0415941	0.0412669	0.0398159	0.0531905	0.0376333	0.0477181
	B7HTK1	0.00616986	0	0.0128395	0	0.0125043	0.00616133	0.00675265	0.0074196	0.00854142	0.0118871	0.047414	0.0360734	0.00644092	0.0110764	0.00616556	0.0062986	0.00582757	0.0113012
def	B7HMU5	0.0501318	0.0394178	0.0463664	0.0441595	0.0508004	0.0500624	0.0365781	0.0334924	0.0308451	0.0590249	0.0856114	0.0868464	0.0697789	0.0549993	0.0890611	0.0511778	0.057873	0.0714195
ispD	B7HQS0	0.00458122	0.00540321	0.019067	0.00518844	0.00464232	0.00457488	0	0	0	0.00882639	0.00782347	0	0	0.00411221	0	0	0.00432707	0
racE2	B7HQP6	0	0	0.00398453	0	0	0	0	0	0	0.00737797	0.00980944	0	0	0	0	0	0	0
	B7HLC7	0.0334226	0.0246372	0.0260822	0.0141947	0.0127006	0.0250323	0	0	0	0.040246	0.0428075	0.040711	0.00436137	0.0112503	0.00417491	0	0.00394605	0.00765241
rplF	B7HQV9	0.446887	0.423043	0.440513	0.25306	0.238341	0.24075	0.205936	0.226276	0.203507	0.402174	0.361497	0.43547	0.23326	0.237515	0.287924	0.162075	0.149955	0.177712
	B7HPK7	0.0487775	0.0410924	0.0362521	0.00789181	0.0353057	0.0278343	0.038132	0.0670373	0.0578798	0.0402758	0.0416493	0.0407412	0.0509204	0.068803	0.0557068	0.0924768	0.0987245	0.102108
dps1	B7HNG8	0.0480813	0.0405059	0.0643225	0.0233375	0.0348018	0.0342963	0.0375878	0.0330402	0.0285269	0.105869	0.0703797	0.0937059	0.121899	0.123311	0.144143	0.119205	0.123266	0.119522
lolS	B7HNL3	0	0	0.0034446	0	0	0	0	0	0	0	0.00565346	0.00322595	0	0	0.00330821	0	0.00312686	0.00606379
	B7HMF0	0	0	0	0	0	0	0	0	0	0	0	0	0	0	0	0.0524182	0	0
cccB	B7HX13	0.0102407	0	0.0106555	0	0	0	0	0	0	0.00986511	0	0.00997909	0.0106906	0	0	0.0104544	0.0193452	0.00937881
	B7HPR9	0.0711057	0.067091	0.0443913	0.0805303	0.0864648	0.0994102	0.0933865	0.10261	0.0590623	0.0410986	0	0.0415735	0.0742294	0.063826	0.0710561	0.0580714	0.0671609	0.0520969
ftsZ	B7HM27	0.191578	0.169464	0.199337	0.143584	0.134181	0.143485	0.117171	0.0982519	0.078005	0.211692	0.185232	0.19492	0.185289	0.171965	0.185814	0.123673	0.141035	0.144492
	B7HPI1	0.00399562	0.00471253	0.00415744	0.0135756	0.0121467	0.00399009	0.00437303	0.00480495	0	0.00384907	0.00341171	0.00389354	0	0	0	0	0	0
	B7HUJ6	0	0	0	0	0.0060198	0	0.0065017	0.0142877	0.016448	0	0	0	0	0	0	0	0	0
	B7HZG3	0.00356372	0	0	0	0	0	0	0	0	0	0.00304293	0	0	0	0	0	0.00336601	0.00326378
acuC	B7HSK2	0	0	0	0	0	0	0	0	0	0	0.00224144	0	0.00274038	0.00235631	0.00262322	0	0	0.00240412
purR	B7HPV7	0.0258683	0.0348683	0.0346063	0.00837058	0.00748953	0.0110711	0.00808908	0.00888803	0.0102319	0.0320394	0.0473315	0.0288085	0.0154313	0.0265371	0.0295432	0.0150903	0.0104714	0.0203067
asnS	B7HRK0	0.106102	0.11237	0.114905	0.0809276	0.0833806	0.0994681	0.059247	0.052079	0.0329742	0.0980386	0.110935	0.0991713	0.0610328	0.0524789	0.0692428	0.0663158	0.0818087	0.0694086
proC3	B7HNQ3	0	0	0	0.00430517	0	0	0	0	0	0.0146476	0.00649162	0.0111126	0.00793665	0.0136486	0.0151947	0.00776128	0.0215426	0.0139256
	B7HKW2	0	0	0.00323449	0	0	0	0	0	0	0.00299458	0.00530863	0.00302918	0.00324516	0.00279035	0.00310643	0.00634691	0.0146807	0.0284696
	B7HNR8	0.0039948	0	0	0	0	0	0	0	0	0.00769656	0.0204661	0.00778549	0	0.00358582	0	0	0	0.00731716
	B7HQA0	0.0119412	0	0.00828318	0.0135239	0.00403347	0.00397488	0.00435636	0.00478663	0	0.0306752	0.0373857	0.038787	0.0457078	0.0428746	0.0477313	0.0446978	0.0451148	0.0546807
resD	B7HKY5	0.0397555	0.0234443	0.0372291	0.00900498	0.00805715	0.0238203	0.00870215	0.00478082	0	0.0268082	0.023762	0.0193699	0.00830041	0.00713709	0.0119183	0.00811701	0.003755	0.0109229
phbB	B7I0M2	0.255573	0.25034	0.25691	0.250201	0.237034	0.233591	0.2086	0.223994	0.191897	0.379732	0.373571	0.396782	0.280367	0.279956	0.359285	0.150353	0.118652	0.122982
	B7HYL9	0	0	0	0	0	0	0	0	0	0	0	0	0	0	0	0.0255879	0.106535	0.0573884
tyrS	B7HVZ8	0.0605886	0.0543093	0.0756509	0.0466611	0.0392938	0.0580845	0.034482	0.0291444	0.0167755	0.0490277	0.0289712	0.0448709	0.0253001	0.0261051	0.0242185	0.0173188	0.0297582	0.0244152
	B7HRI0	0.0162074	0	0	0	0.0164236	0.03237	0.0886917	0	0	0.015613	0	0	0.0338389	0.0872889	0.0323922	0.0330912	0.0459248	0
tenI	B7HWF1	0.00503815	0.00594211	0.0104844	0	0.00510534	0	0	0	0	0	0.00430188	0.00490943	0	0.00452235	0	0	0	0.00461411
purF	B7HS33	0.0625945	0.0711888	0.0721077	0.02785	0.027184	0.0267891	0.0244668	0.0215067	0.0123792	0.0538381	0.0591735	0.0544601	0.0303384	0.0200665	0.0357433	0.0114108	0.00422299	0.00818946
glpP	B7HYU1	0.00547429	0.00645651	0	0	0.0055473	0.00546671	0	0	0	0.00527351	0.00467429	0.00533444	0.0114296	0.00491385	0.0109409	0.00558851	0.00517059	0
	B7HZ27	0	0	0	0	0	0	0	0	0	0	0	0	0	0.0184408	0.0102648	0	0.00970213	0
	B7HVL3	0	0	0	0	0	0	0	0	0	0.00278425	0.00493576	0.0112657	0	0.00259435	0	0	0	0
	B7HRE2	0	0	0	0.0126517	0.01132	0	0	0	0	0	0	0	0.0116618	0.0100274	0	0	0	0
sbcD	B7HR36	0.00517947	0.0030544	0.00808386	0.00586598	0.00524855	0.0051723	0.00283435	0	0	0.0174633	0.0176902	0.017665	0.00270351	0.0139476	0.00517586	0.00264377	0.00489212	0.00948709
	B7HWD6	0.14154	0.171994	0.133884	0.1603	0.130389	0.141344	0.0704133	0.0464208	0.0296886	0.148744	0.157479	0.158821	0.120893	0.0962495	0.128583	0.0656787	0.0769716	0.0707058
	B7I0N5	0	0.0137808	0.0121575	0	0	0	0	0	0	0	0	0	0	0	0	0	0	0
	B7I0N3	0	0	0	0	0	0	0	0	0	0.00493043	0	0.0049874	0	0.00459417	0	0	0	0
	B7I0Q3	0	0.0186211	0.0164277	0.0178809	0.0159988	0.0157664	0.0172796	0.0379725	0.0218569	0	0.013481	0	0	0.0141719	0	0.0322353	0	0.0144594
	B7I1I0	0	0	0	0	0	0	0	0	0	0	0.00792545	0	0	0.00416581	0.0046377	0	0	0
	B7I1M2	0	0	0	0	0	0	0	0	0	0	0	0	0.0092427	0.00794731	0	0.0271154	0.0167251	0.0162171
	B7I1K7	0.0124241	0.0146532	0.0129272	0	0.00944232	0.00620343	0.0101982	0	0	0.0119684	0	0.0151333	0.00324247	0	0.0155192	0.0253666	0.0234696	0.0170676
	B7I1K3	0.145533	0.11157	0.143856	0.0824114	0.0884846	0.145332	0.111496	0.0525035	0.0805892	0.0981369	0.0807726	0.0850892	0.0835597	0.065317	0.0945307	0.0668564	0.0824757	0.0932992
	B7I1N1	0.048332	0.0316689	0.0502894	0.021287	0.0217674	0.0241326	0.0235099	0.022603	0.0111516	0.0413861	0.0435616	0.0444807	0.0196215	0.0192817	0.0214659	0.0191879	0.0355061	0.0270503
	B7I1K5	0.0262051	0.0618139	0	0.118714	0.34521	0.261688	0.200762	0.220592	0.217667	0	0	0	0.0273563	0	0	0.0535037	0	0.0239996
	B7I1K9	0.0156162	0	0.00541623	0.00589536	0.00527484	0	0	0	0	0.00501449	0.00444471	0.00507243	0.0108682	0.0046725	0.00520178	0.00531402	0.00491663	0.00476731
	B7I1I2	0.00241103	0.00426545	0.00125434	0.0027306	0.00244319	0.00240769	0.00395816	0.0057988	0.00500667	0.0023226	0.00205869	0.00234944	0.00755086	0.00973888	0.0108421	0.00615334	0.0159409	0.0231851
	B7I1K4	0.056813	0.0709482	0.0730231	0.0492036	0.0372516	0.0400478	0.0438913	0.0361698	0.0231325	0.0289743	0.0285356	0.0260525	0.0244213	0.0269982	0.0400753	0.0272934	0.0378785	0.0397887
	B7I1J0	0	0	0	0	0	0	0	0.00372075	0.00856664	0	0	0	0	0	0	0	0	0
	B7I1L3	0.0124808	0.0147202	0	0	0	0.0124635	0	0	0	0	0	0	0	0	0	0	0.0117884	0
	B7I1M9	0.00423387	0	0.013216	0	0.00429033	0.00422801	0	0	0	0.00407858	0.00723028	0.0041257	0.00441987	0.00380041	0	0.00432221	0.0159959	0.0155101
	B7I1J4	0	0	0	0	0	0	0	0	0	0	0.00989888	0.00564844	0	0	0	0.0236699	0.0109499	0.0212347
	B7I1H8	0.00254073	0.0029966	0.0079309	0.00287749	0.00257462	0.00253722	0.00556145	0	0	0.026923	0.0433888	0.0321857	0.0344806	0.0524542	0.0482403	0.0181562	0.0239978	0.0302496
	B7I1J3	0	0	0	0	0	0	0	0	0	0.00112598	0.000998037	0	0	0	0	0	0.001104	0
	B7I1N9	0	0	0	0.00239844	0	0	0	0	0	0.00204007	0	0	0	0	0	0	0	0
	C2RZT0	0	0	0	0	0	0	0	0	0	0	0	0	0.0155589	0.0133783	0.0223406	0.00760756	0.0140773	0.00682487
	C2RZU9	0.00464082	0.0054735	0.00724317	0.00262797	0	0.0069516	0.00253959	0	0	0.00447061	0.00792525	0.00226113	0	0	0	0	0	0
queC	B7HK63	0.00935607	0.0110348	0.00973499	0.00529808	0	0	0	0	0	0	0.0039944	0	0	0.00419911	0	0	0	0
queF	B7HK66	0.0705184	0.0554474	0.0733744	0.0399326	0.0238196	0.0410788	0.0192948	0.0212006	0.00813534	0.045288	0.0351243	0.0629904	0.0429429	0.0421992	0.0704692	0.0539923	0.0277526	0.0538194
dltC	B7HK93	0	0.0146137	0.0128924	0	0.0125558	0.0123734	0.0135609	0.0298006	0	0	0	0	0	0.011122	0	0	0	0.0113477
dltA	B7HK95	0.0324439	0.0239157	0.048527	0.0183721	0.0205479	0.0202494	0.00887712	0.00243848	0	0.0214871	0.0277027	0.0256872	0.00846731	0.0109209	0.00810532	0.00621016	0.00574575	0.00742833
	B7HKB7	0.0136349	0	0	0.0463265	0.0414503	0.0408482	0.0596914	0.0819838	0.0755036	0	0	0	0.0284679	0.012239	0.0272508	0.0835165	0.0643925	0.0749242
leuC	B7HKC6	0	0	0	0.00252725	0.00226125	0.0022284	0.00488453	0	0	0.00214964	0	0	0.00465903	0.0120182	0.00891971	0	0	0
hisZ	B7HKC8	0.00234969	0	0.00244485	0	0	0.00234643	0	0	0	0.00679052	0.00601893	0.00228966	0.00735873	0.00843652	0.00939218	0.0119936	0.019974	0.0172154
hisG	B7HKC9	0	0	0	0	0	0	0	0	0	0	0	0.00474122	0.0101586	0.0174696	0.00972426	0.00993409	0.0137868	0.0133681
hisB	B7HKD1	0	0	0	0.0120996	0.00541302	0.00533439	0.00584635	0.00642379	0	0.0102917	0.0136834	0.0208213	0.0278823	0.0143847	0.0266903	0.0436259	0.0403635	0.0342454
hisH	B7HKD2	0.00493364	0	0	0	0	0	0	0.00593297	0	0.00950537	0.00421265	0.0192304	0.0206015	0.0221427	0.0197208	0.0100732	0.00931986	0.00903681
hisA	B7HKD3	0.00437701	0	0.00455428	0	0.00443539	0.0131129	0.0095809	0.0052636	0	0.0252989	0.0298989	0.0255911	0.0274158	0.0196445	0.0393656	0.00893667	0.00826837	0.00801725
hisF	B7HKD4	0	0	0.00444752	0	0	0	0.00467815	0	0	0.0123529	0.014599	0.0166608	0.0133866	0.0153472	0.0299	0.00872718	0.00403727	0.0078293
hisI	B7HKD6	0	0	0	0	0	0	0.0100538	0	0.012717	0	0.00784366	0	0.00958965	0.0164913	0.0183594	0	0	0.00841295
hisE	B7HKE5	0	0	0	0	0	0	0	0	0	0.0121404	0.0107609	0.0122806	0.00438541	0.00377079	0.00419793	0	0	0.0076946
sat	B7HKE6	0	0	0	0	0	0	0	0	0	0.0778697	0.0759237	0.0656412	0.0450057	0.0362794	0.0296186	0.046762	0.053445	0.0814343
hutI	B7HKI9	0	0	0	0	0	0	0	0.00298889	0.0034408	0.00239429	0.00212223	0.00242195	0.00518928	0.00669298	0.00248372	0.00761192	0.00939025	0.0113813
hutU	B7HKJ0	0	0	0	0	0	0	0	0	0	0.00909843	0.00967752	0.00736284	0.0216915	0.0118691	0.00188765	0.0269973	0.0196259	0.0276798
hutH	B7HKJ1	0	0	0.00215363	0	0	0	0	0	0	0.00199389	0.00706931	0.00403385	0.00216073	0.0018579	0	0	0.00586492	0.009478
hutP	B7HKJ2	0.00725277	0	0	0	0	0.00724273	0	0	0	0.0209603	0.0123857	0.0212024	0.0075714	0.0130205	0.0144954	0.0074041	0.0068504	0.0132847
	B7HKP5	0.109557	0.0646068	0.0997444	0.139587	0.152649	0.136756	0.0599525	0.0658739	0.0379169	0.145115	0.140319	0.106758	0.0857771	0.221266	0.0821101	0.0559212	0.103479	0.100336
hfq	B7HKR8	0.0265449	0.0626155	0.01381	0.0751583	0.121045	0.0530164	0.0871569	0.0957652	0.0183741	0.038357	0.0566643	0.0517336	0.0831333	0.107223	0.132632	0.0948458	0.112825	0.0729324
miaA	B7HKR9	0.00625216	0	0.0130107	0	0	0	0	0	0	0.00903427	0.0160154	0.00304621	0	0.00841811	0.0031239	0.0031913	0.00885795	0.00286297
pepT	B7HKU6	0.0274493	0.0294312	0.0675078	0.0169568	0.0278154	0.0224274	0.0218488	0.00600169	0.00690912	0.0480773	0.0553987	0.0559277	0.0338652	0.0559979	0.049873	0.0433067	0.047139	0.0639903
deoD	B7HKX2	0.0357559	0.0263571	0.055806	0.0354332	0.0271746	0.0535596	0.0195666	0.0161244	0	0.0430556	0.0381633	0.0391977	0.0186633	0.0240714	0.0223318	0.0273764	0.0379937	0.0286532
cmk	B7HL06	0.0272586	0.0160748	0.0330897	0	0.0092074	0.0136105	0.00994447	0	0	0.0612707	0.0310335	0.0309893	0.0189708	0.028546	0.00907988	0.0092758	0.0171643	0.0249644
der	B7HL14	0.033044	0.0528918	0.0564852	0.0294044	0.0191341	0.0235702	0.0206659	0.0113535	0	0.0477481	0.0382919	0.0459998	0.0295677	0.0381356	0.0353796	0.0313239	0.0401282	0.0410711
gpsA	B7HL15	0.0125501	0.00370047	0.016323	0.00355338	0.00317937	0.00313318	0.00686777	0.00377304	0.00434351	0.0120898	0.0160741	0.0091721	0.00655072	0.0112652	0.00627067	0.0160149	0.0177808	0.0143673
folE	B7HL21	0.0709706	0.0450717	0.045443	0.049463	0.0442567	0.0490655	0.0238998	0.00656509	0	0.0525905	0.0652607	0.0744773	0.0797876	0.0539041	0.0872875	0.0501587	0.0773462	0.049998
menG	B7HL23	0.0128043	0.00503391	0.00888193	0.00483382	0.0173001	0.0127866	0	0	0	0.00822313	0.0182219	0.00831814	0.00891122	0	0.00853026	0	0.00403132	0.00390889
aroB	B7HL27	0.0283026	0.0133523	0.0235591	0.0128216	0.00860403	0.0169581	0.0092928	0.00680709	0.00391815	0.0436233	0.0386665	0.0330955	0.0236368	0.0254051	0.0254546	0.0144466	0.0187127	0.0259206
	B7HL30	0	0	0	0.00606424	0.0108519	0.00534712	0.00586031	0	0	0.0103163	0.0182881	0.00521774	0.0111795	0.0288381	0.0214032	0	0.00505748	0
dapB	B7HL46	0.0235399	0.0277636	0.0408221	0.0355466	0.0278295	0.0235073	0.0300573	0.018872	0.0108627	0.0642502	0.0602996	0.0267616	0.0327654	0.0281733	0.0274441	0.0200259	0.022234	0.0359312
mgsA	B7HL47	0	0	0.00813104	0	0	0.00780373	0	0	0	0.0225838	0.0333628	0.0228447	0.0326314	0.0280581	0.0156182	0.0079776	0.0295241	0.0286274
cca	B7HL53	0.0188768	0.00445274	0.0274978	0	0	0.00377013	0	0	0	0.0109106	0.00967089	0.0147156	0	0	0	0	0	0
panB	B7HL54	0.014353	0.00423206	0.00373357	0.00406384	0	0.00716655	0.00392718	0.00431506	0	0.0345664	0.0214471	0.0104897	0.0112376	0.00644177	0.0179287	0.00732622	0.0101675	0.013145
panD	B7HL55	0.0165009	0.00973076	0	0.00934397	0.0250814	0.016478	0.00902974	0.00992159	0	0.0158956	0.0211342	0.0160793	0.00861288	0.00740577	0	0	0	0
gpsB	B7HL74	0.00874712	0.0206331	0.0182028	0.019813	0.0265913	0.01747	0.02872	0.0210378	0.0242186	0.0168526	0.00746884	0.0340946	0.0182628	0.0471097	0.0262231	0.0178593	0.0165237	0.0160219
xpt	B7HL82	0.100792	0.11262	0.115913	0.0720954	0.0591314	0.0741648	0.0580591	0.0382761	0.0367194	0.0613232	0.0815327	0.0775396	0.0498409	0.0238087	0.0530113	0.00541551	0	0
mutL	B7HLA2	0.00774963	0.00182802	0.00806348	0.00702143	0.00471179	0.00619112	0.00169633	0.00186387	0	0.00447923	0.00529369	0.00604131	0.00161802	0.01113	0.00309769	0.00158226	0.00439182	0.00851686
mutS	B7HLA3	0.0102213	0.0120552	0.0106353	0.0090036	0.00805592	0.00680476	0.00124297	0	0	0.00875236	0.0116368	0.00885348	0.00474237	0.007136	0.00567453	0.00463758	0.00214539	0.00208023
miaB	B7HLA6	0.0196698	0.0162393	0.0204664	0.00891077	0.00996607	0.00589277	0.00430555	0	0	0.00568451	0.0100772	0.00766692	0.00616018	0.00353121	0.00589682	0	0.00185786	0.00360286
cinA	B7HLB5	0.0201873	0.017857	0.0183792	0.0114315	0.0102283	0.0125996	0.00828529	0.00910361	0	0.0461863	0.0495568	0.0393431	0.0263427	0.0294459	0.0302598	0.0334888	0.0357512	0.0485316
pnp	B7HLE0	0.11444	0.131512	0.126707	0.0880668	0.0713636	0.0732571	0.0545958	0.0423446	0.0304668	0.16395	0.16787	0.171563	0.111809	0.13038	0.108495	0.0943605	0.105319	0.0980893
rpsO	B7HLE1	0.217331	0.269141	0.237439	0.233829	0.253263	0.249584	0.166501	0.196014	0.105304	0.198891	0.231963	0.232956	0.215534	0.243851	0.249756	0.210772	0.153955	0.139327
rbfA	B7HLE4	0.0171268	0.0100999	0.0089102	0	0.0086776	0	0.00937226	0.0102979	0.011855	0.00824931	0.0146239	0.0166892	0.0178792	0.00768669	0.00855741	0.0174841	0	0
infB	B7HLE6	0.12123	0.119747	0.12614	0.0840952	0.0691013	0.0892833	0.0597064	0.0728928	0.0440549	0.159118	0.183737	0.165386	0.136047	0.140104	0.113574	0.11293	0.124524	0.131844
rimP	B7HLF0	0.0259387	0.0152963	0.0202419	0.0220325	0.0197134	0.0194271	0.0141944	0.00779817	0.00897722	0.0249873	0.0221481	0.018957	0.0473868	0.0407454	0.0259206	0.0264799	0.0244996	0.0178167
proS	B7HLF2	0.0472679	0.0428838	0.0624236	0.0267665	0.0202647	0.0254167	0.0159177	0.0153037	0.00503358	0.0490368	0.0605404	0.051375	0.0208765	0.0391649	0.0236174	0.0278389	0.0326256	0.0466196
dxr	B7HLF4	0.00542748	0.00320065	0.00282365	0	0	0.00270999	0	0	0	0.00261421	0.00926865	0.00528883	0.00566592	0.00243591	0	0.00554073	0	0.00497068
frr	B7HLF7	0.239177	0.24929	0.289376	0.11969	0.152184	0.144418	0.127841	0.107023	0.107804	0.257196	0.227971	0.281848	0.214845	0.21469	0.216776	0.176028	0.199639	0.203764
tsf	B7HLF9	0.721125	0.70876	0.772399	0.432374	0.426266	0.402424	0.375276	0.289064	0.249577	0.898993	0.875319	0.830153	0.575674	0.577491	0.593453	0.469129	0.550905	0.585972
rpsB	B7HLG0	0.545278	0.58697	0.553854	0.382294	0.333285	0.337086	0.246292	0.265413	0.221669	0.537786	0.49885	0.598821	0.325276	0.353495	0.432459	0.220895	0.273864	0.289327
codY	B7HLG1	0.187442	0.164629	0.22823	0.121951	0.0969914	0.135408	0.122215	0.10551	0.1049	0.218985	0.197508	0.252605	0.233146	0.225529	0.251076	0.154711	0.18081	0.19358
hslU	B7HLG2	0.0923929	0.077836	0.10529	0.0523195	0.0401251	0.0681004	0.0650057	0.0608446	0.0395902	0.0847659	0.0845259	0.0707398	0.130899	0.110579	0.105518	0.204361	0.205701	0.179307
hslV	B7HLG3	0.0118091	0.0139279	0.0122873	0.00668714	0.0119666	0.0176891	0.0323113	0.0213016	0.0081741	0.0113759	0.015125	0.0172611	0.0308196	0.0318002	0.0413029	0.0421941	0.0446157	0.0324455
trmFO	B7HLG5	0.0215202	0.0253815	0.0323437	0.00541614	0.0121151	0.00716349	0.005234	0.00575095	0	0.0437653	0.0306256	0.0396109	0.0124809	0.00858535	0.00955788	0.0146462	0.0158094	0.0218989
sucC	B7HLG9	0.190179	0.191794	0.22656	0.143591	0.0977542	0.126611	0.120663	0.10275	0.0686817	0.241617	0.209455	0.209493	0.172638	0.150917	0.179029	0.168824	0.130165	0.156503
rnhB	B7HLH0	0.00395945	0	0	0	0	0	0	0	0	0.00381423	0	0	0.00826679	0	0.0118701	0.00808413	0.00373979	0
rplS	B7HLH3	0.313755	0.421447	0.253915	0.296118	0.256118	0.287211	0.219389	0.157212	0.0603272	0.302248	0.297671	0.356696	0.309342	0.29728	0.322246	0.186843	0.189334	0.151656
trmD	B7HLH4	0.0082065	0.00483948	0	0	0	0	0	0	0	0.0118583	0.00350361	0.00799685	0.00428351	0	0	0	0	0
rimM	B7HLH5	0.00594518	0	0	0	0	0	0	0	0	0.0114543	0.0253818	0.0115866	0	0.010673	0.00594103	0	0.00561535	0.00544481
rpsP	B7HLH7	0.374283	0.441439	0.318634	0.398201	0.310316	0.294481	0.211025	0.150032	0.125612	0.338703	0.271164	0.364721	0.355205	0.346145	0.328686	0.266307	0.257104	0.166197
	B7HLI2	0.0328115	0.029024	0.0512105	0.0139352	0.00831227	0.00819152	0.00897769	0.0049322	0	0.0316081	0.0210124	0.0359699	0.0214081	0.0184077	0.0163943	0.00837402	0.0077478	0.00751248
rnc	B7HLI3	0.350497	0.588278	0.140266	0.564895	0.683022	0.53848	0.66393	0.697083	0.72783	0.0519449	0.0460425	0.0919538	0.379968	0.22991	0.336781	0.371572	0.190992	0.222229
plsX	B7HLI6	0.025932	0.0305849	0.0371006	0.0146846	0.0131389	0.00971105	0.0106431	0.00779617	0.00448746	0.0374714	0.0498204	0.0536978	0.0135356	0.0232772	0.0291532	0.00992741	0.0122467	0.00890605
fapR	B7HLI7	0.00503698	0	0	0	0	0	0	0	0	0	0.00860178	0	0	0	0	0	0	0
rpmB	B7HLJ1	0.132603	0.195494	0.189713	0.187723	0.184761	0.165524	0.0907051	0.119597	0.0688396	0.191609	0.169837	0.161519	0.121125	0.193419	0.0993827	0.084606	0.078279	0.0759015
rlmN	B7HLJ7	0.00828503	0.00651438	0.0201147	0	0	0.00551571	0.00302254	0	0	0.0239435	0.0212228	0.021529	0.002883	0.00743683	0.00275975	0	0	0.00252924
fmt	B7HLJ9	0.0363543	0.0311834	0.0412654	0.0149719	0.0234431	0.0231025	0.0180855	0.00794873	0	0.0604906	0.067727	0.0418665	0.027601	0.0385656	0.0429342	0.0236172	0.0312158	0.0454017
rpoZ	B7HLK3	0.162839	0.226975	0.0924184	0.100594	0.195012	0.236529	0.162018	0.124614	0.143456	0.0142606	0.0379205	0.0288507	0.0463616	0.0797278	0.0443796	0.0453372	0.0139823	0.0271152
	B7HLK5	0.011878	0.0280183	0.0247181	0.0269046	0.0481455	0.0237231	0.0129999	0	0	0.034327	0.0304265	0.0462981	0.0371994	0.0319858	0.0474787	0.0485032	0.033657	0.0326348
pyrF	B7HLL7	0.157684	0.123984	0.150398	0.0496066	0.0488238	0.0437405	0.0431445	0.0263366	0.0242549	0.126584	0.11594	0.145119	0.0731605	0.074702	0.100672	0.0313005	0.0413711	0.0601719
pyrD	B7HLL8	0.0800052	0.0697444	0.0760066	0.0157581	0.00704976	0.0138947	0.0114212	0.00836614	0.00481554	0.070369	0.080194	0.0610132	0.0254191	0.0312237	0.0278085	0.00355106	0.0164275	0.0223001
pyrK	B7HLL9	0.0161408	0.0237961	0.033589	0	0.00408902	0	0	0	0	0.0116616	0.0206731	0.0196606	0	0.0108663	0.0120972	0.0041194	0.00381134	0.00369558
carB	B7HLM0	0.142226	0.130088	0.108724	0.0635542	0.0519626	0.0521739	0.0264728	0.0221065	0.0147336	0.116505	0.0966574	0.109365	0.0636317	0.0633983	0.0502761	0.0207419	0.0219323	0.0248106
pyrC	B7HLM2	0.061565	0.0609935	0.0845571	0.013945	0.00998177	0.0196735	0.013476	0	0	0.0616793	0.0714926	0.0599922	0.0128539	0.0221048	0.0221479	0.00251398	0.00465196	0.0112767
pyrB	B7HLM3	0.0231344	0.0350811	0.0171938	0.00374296	0.00669799	0.00330034	0.00361709	0	0	0.0159185	0.0112878	0.00966146	0	0	0	0	0	0
pyrR	B7HLM5	0.106829	0.112734	0.111155	0.0254712	0.0284877	0.0280739	0.0184609	0.0338072	0.0389187	0.0758288	0.0960179	0.065747	0.0469565	0.0605632	0.061805	0.0172196	0.058417	0.0566428
ileS	B7HLM9	0.0856136	0.0854402	0.0845126	0.0633976	0.0533879	0.0591889	0.0300322	0.0303585	0.0167146	0.0496956	0.0459232	0.0492002	0.0309374	0.0325129	0.0230337	0.0235307	0.0290281	0.0341778
sepF	B7HM19	0.0194027	0.030512	0.067295	0.0146496	0.0131077	0.0387517	0.00707848	0.00777761	0	0.0498429	0.0386569	0.0441164	0.0067517	0.0348326	0.0129261	0.00660251	0.0122175	0.0118465
murD	B7HM33	0.0305522	0.036034	0.0513523	0.0133083	0.0214336	0.0211222	0.0154329	0.014131	0.00976055	0.0316956	0.0401344	0.0274815	0.0220807	0.0210956	0.0258338	0.0191936	0.0244176	0.0344379
mraY	B7HM34	0.00328763	0	0.00342078	0	0.00333148	0.00328308	0.00359817	0.00395355	0	0.0063341	0.00561437	0.00640728	0.00343206	0.00885315	0.00657067	0.00671245	0	0.00602186
rsmH	B7HM39	0.0262828	0.00387483	0.0307657	0.018604	0.0133167	0.00656161	0.010787	0.00395082	0	0.022154	0.0280524	0.0256114	0.00342968	0.00884702	0.00656612	0.0033539	0.00620618	0.0120354
bshC	B7HM40	0.0127236	0.0192941	0.0170215	0.0102929	0.0073676	0.012706	0.0079574	0.00437167	0.00503265	0.0140079	0.0155203	0.0123986	0.00379502	0.0130526	0.00726556	0.00742234	0.0154514	0.0133174
	B7HM42	0.0192066	0.00755091	0.013323	0.0217523	0.0129752	0.0255733	0.0210208	0.023097	0.0177261	0.0185021	0.0109332	0.0311932	0.0334173	0.022987	0.0383864	0.0261431	0.0241881	0.0175901
rpmF	B7HM44	0.251284	0.275201	0.168082	0.264262	0.236447	0.250936	0.176798	0.0647534	0.0745439	0.207486	0.122607	0.174903	0.206111	0.161113	0.215236	0.10994	0.0847654	0.0493145
tmcAL	B7HMA5	0	0	0	0	0	0	0	0	0	0.00244223	0.00216472	0.00494089	0	0.00227566	0	0	0.00478913	0.00464367
coaD	B7HMA9	0.0187312	0.00736401	0.0259864	0.00707129	0.006327	0.00623509	0	0.0150169	0	0.0180442	0.0213251	0.0182526	0.013036	0.0168135	0.00623937	0.006374	0.00589734	0.0114365
	B7HMD4	0.0427383	0.037805	0.0333519	0.048403	0.108271	0.106698	0.116938	0.0899415	0.10354	0.0308781	0.0456158	0.0624697	0.100386	0.0767257	0.0747398	0.109075	0.0807345	0.0782825
	B7HME6	0.0318755	0.0125316	0.0221109	0.0361004	0.0215337	0.0318313	0.0232575	0.0127773	0.0147092	0.0204709	0.0272173	0.0207074	0.0332758	0.0286121	0.0318532	0.0542342	0.0702499	0.0291927
tgl	B7HME8	0	0	0	0	0	0	0	0	0	0	0	0	0	0	0	0.00372744	0.0103461	0.0133758
dsdA	B7HMG6	0.00233689	0	0	0	0	0	0	0	0	0.00225118	0	0	0	0	0	0	0	0
asnA	B7HMI7	0.0481869	0.0603848	0.0564057	0.0170543	0.0122074	0.01203	0.0164808	0.0108651	0.0083386	0.0957402	0.064289	0.0704337	0.0314399	0.0405502	0.0451437	0.0491923	0.0512027	0.0579223
ilvD	B7HMM7	0	0	0	0	0	0.00191075	0	0	0	0	0.00326756	0	0.00199746	0.00343502	0	0.00390664	0.00542174	0.00525708
mtaD	B7HMN9	0	0	0	0	0	0	0	0	0	0	0	0.00232226	0	0.00213916	0	0.00243287	0.00450187	0.00654771
	B7HMP7	0.0562551	0.0221162	0.0650372	0.0106186	0.0126679	0.0187258	0.0102615	0.011275	0.00432658	0.0331172	0.0480342	0.027409	0	0.0112213	0.00624621	0.00319049	0.00885571	0.0143112
deoC	B7HMQ9	0.0489572	0.0577413	0.0815039	0.00554461	0.024805	0.00977788	0.00535815	0.00588737	0	0.0424454	0.0668843	0.0811009	0.0664403	0.0395505	0.0782768	0.0949594	0.0554894	0.0762224
	B7HMU7	0.097398	0.114874	0.0579101	0.0787911	0.098697	0.0833685	0.0609131	0.0334647	0.0385245	0.0938257	0.0712839	0.0677927	0.101677	0.0999161	0.0834258	0.0994302	0.0525683	0.0637147
	B7HMV1	0.0054726	0.00322726	0.00854136	0.00619796	0.00831838	0.00546503	0.00598953	0.00329055	0	0.00790782	0.0140186	0.013332	0.011426	0.00982466	0.00820318	0.0111736	0.010338	0.01253
dapH	B7HMV2	0.151799	0.210629	0.19511	0.192144	0.14025	0.160505	0.136819	0.128856	0.105073	0.210745	0.22492	0.204478	0.149146	0.156296	0.178462	0.109388	0.151811	0.143111
metE	B7HMX7	0.208899	0.202992	0.224194	0.196412	0.189052	0.216482	0.140917	0.148515	0.112768	0.273378	0.269239	0.24581	0.197503	0.185153	0.156236	0.174361	0.174972	0.182894
nagB	B7HN32	0.0514937	0.0560611	0.0577006	0.0493467	0.0602082	0.055378	0.0606928	0.0762141	0.0877374	0.0381577	0.0473507	0.0617577	0.00413507	0.0142221	0.00791658	0	0.0074826	0.010883
scpB	B7HN35	0.00537935	0	0.00559721	0.00609235	0	0	0	0	0	0.0103641	0.00918646	0.00524192	0	0.00965725	0	0	0	0.0049266
spoIIAB	B7HN53	0	0	0	0.0399984	0.042946	0.0141074	0.0541145	0.0679535	0.019557	0	0	0	0.0958589	0.0570628	0.0988194	0.0288433	0.0133432	0.0129379
deoB	B7HN67	0.0364269	0.0337565	0.062268	0.0530423	0.0474593	0.0675564	0.0569539	0.0406764	0.0252143	0.0426104	0.0533205	0.0608509	0.0488922	0.0490465	0.0624026	0.0717178	0.0589818	0.0762539
thrB	B7HNB7	0	0	0	0	0	0	0	0	0	0	0.00610327	0	0	0.00320803	0	0.00364848	0.00337564	0.00327312
nadE	B7HND7	0.0305713	0.0315495	0.0397618	0.0216396	0.0154895	0.0343451	0.0125471	0.0137864	0	0.0478563	0.0424185	0.0484092	0.0279251	0.0445924	0.0267312	0.0429126	0.0360941	0.0244985
namA	B7HNI1	0.00594663	0.0035068	0.00309373	0	0.00602594	0.0029692	0.00325417	0.00357558	0	0.011457	0.0177716	0.00869207	0.00931181	0.0133446	0.00891372	0.00910606	0.0112335	0.0108923
ribBA	B7HNM8	0.0548202	0.0646563	0.0570404	0.0354779	0.0238077	0.0364962	0.0171424	0.012557	0.0036139	0.0628685	0.0579539	0.0483321	0.0218013	0.0187458	0.015652	0.00266495	0.00246566	0.00717233
ribH	B7HNM9	0.141022	0.149692	0.146733	0.231584	0.171483	0.218281	0.200645	0.169586	0.175705	0.122264	0.138475	0.158032	0.161939	0.120255	0.147969	0.107973	0.106559	0.122695
bioB	B7HNN1	0.124221	0.117207	0.142177	0.0633085	0.0566449	0.055822	0.0509829	0.0298765	0.0257953	0.134623	0.119326	0.133152	0.0810488	0.0864151	0.0993073	0.0412141	0.0469317	0.0455063
bioF	B7HNN4	0.00782391	0	0.00814078	0	0.00264275	0.00260436	0	0	0	0.0200985	0.0178148	0.0177894	0.00816762	0.00234097	0	0	0	0.00238847
rnz	B7HNQ7	0.00335292	0.00395452	0.00348871	0.00379733	0	0.00334828	0	0	0	0.00322994	0.00286293	0.00326726	0	0	0	0	0.00316691	0.00614145
buk	B7HNS7	0.0315496	0.0372104	0.0417803	0.0292347	0.0174384	0.0229134	0.0125562	0.0034491	0	0.0303924	0.036735	0.0419231	0.00898244	0.0128726	0.0114646	0	0.00541805	0
argR	B7HNT8	0.0813501	0.0319821	0.0634836	0.0383886	0.0343479	0.0541584	0.0296781	0.024457	0.00938494	0.0653054	0.0810388	0.0792718	0.0920009	0.115618	0.12194	0.0622856	0.108852	0.130381
dxs	B7HNU0	0.00495768	0.00194907	0.00343898	0	0.0016746	0.00330055	0	0	0	0.00159195	0.0112885	0	0	0	0	0	0.00468264	0.00454042
xseA	B7HNU3	0	0	0	0	0	0	0	0	0	0.00215201	0.00190748	0	0	0	0	0	0	0.00204593
folD	B7HNU4	0.07374	0.0739252	0.0959081	0.0584597	0.0523064	0.0662742	0.0524584	0.0221691	0.0153126	0.0923461	0.0944458	0.100599	0.0538857	0.0661907	0.051582	0.0414032	0.0278596	0.0506503
nusB	B7HNU5	0.0682506	0.0536643	0.0867958	0.0772968	0.0691609	0.0681562	0.0746974	0.0638362	0.0839863	0.0292211	0.0518015	0.0369483	0.0316662	0.0476492	0.0378906	0.0232249	0.0143254	0.00694515
efp	B7HNW0	0.0332981	0.0261818	0.0230978	0.0188558	0.0281185	0.0332521	0.0060739	0	0	0.0320769	0.0236934	0.0324475	0.023174	0.0149446	0.0332749	0.011331	0.0209672	0.0152478
aroQ	B7HNW2	0.0212581	0.0167149	0.0221191	0	0.0215416	0.0283049	0	0	0	0.0204784	0.0181515	0.01381	0.0147947	0.00636059	0.0141622	0.00723389	0	0.00648965
mntR	B7HNW6	0.00691463	0.00815528	0.021584	0.0156622	0.00700685	0.0207152	0.00756776	0.0166304	0.0191449	0.0199831	0.0354249	0.0336899	0.0072184	0.0620672	0.034549	0.0282356	0.0522482	0.0949899
gcvPB	B7HNY9	0.160881	0.177426	0.167397	0.0780878	0.0719858	0.0605077	0.0617414	0.0251258	0.0173548	0.17712	0.183755	0.181203	0.085065	0.0787693	0.08978	0.0554569	0.0749911	0.0880217
gcvPA	B7HNZ0	0.111486	0.120532	0.128085	0.0552401	0.0494257	0.0347912	0.0381303	0.030724	0.032154	0.125297	0.136841	0.133534	0.0606166	0.0646301	0.0649882	0.0426796	0.0548444	0.0744501
gcvT	B7HNZ1	0.168281	0.228751	0.21071	0.0872174	0.10405	0.0968415	0.0842843	0.0548794	0.0473827	0.239043	0.226493	0.225128	0.122079	0.125451	0.128261	0.0989991	0.0969837	0.0992625
fhs	B7HP29	0.0834901	0.0984702	0.0908201	0.0644701	0.0634527	0.060636	0.0436114	0.0342277	0.0157612	0.14806	0.145819	0.138677	0.103005	0.0987879	0.0891204	0.0794208	0.0752738	0.095579
aroK	B7HPH8	0.0774586	0.0778223	0.0985059	0.0454872	0.0348852	0.0343784	0.0313982	0.0413992	0.0198578	0.0773813	0.0759374	0.0950486	0.0838564	0.10043	0.0716709	0.0527165	0.0785808	0.0893311
ispG	B7HPI4	0.00697329	0.00822447	0.00725571	0	0	0	0	0	0	0.0134351	0.0238169	0.0101927	0.0109195	0.00312969	0.00696843	0.00711879	0.00329322	0.015966
ispH	B7HPI8	0.013127	0.00387059	0.0239027	0	0	0	0	0	0	0.00948418	0.0140109	0.0127917	0.00342593	0.00883734	0.00983841	0	0.00619939	0.00901666
	B7HPJ5	0.0567454	0.0356943	0.0590436	0.0214222	0.0191674	0.0340001	0.0165614	0.0181972	0.00523714	0.0291542	0.0516829	0.0221183	0.0197461	0.0135829	0.0226823	0.0193098	0.0428778	0.027717
ybeY	B7HPK2	0.0381198	0.0374662	0.0198318	0.0215862	0.0257521	0.025378	0.0278137	0.0229206	0.0351815	0.0244811	0.0271242	0.024764	0.033162	0.0342172	0.0190466	0.0324293	0.0240033	0.0290929
rpsU	B7HPK8	0.338855	0.51955	0.299692	0.326203	0.291868	0.25379	0.203974	0.142622	0.187641	0.24482	0.231469	0.280669	0.212245	0.243331	0.237033	0.207555	0.192034	0.0620671
prmA	B7HPL1	0.0170116	0.00802557	0.0212407	0.00385328	0.0172385	0.0169881	0.00744739	0.00818296	0	0.00655507	0.00581023	0.0066308	0	0	0.0067999	0	0	0
dnaJ	B7HPL2	0.0199012	0.0234719	0.0295816	0.0225389	0.00864282	0.0227127	0.0124463	0.00683778	0	0.0410812	0.0315582	0.0304743	0.00890376	0.0331755	0.0113642	0.0203164	0.0241677	0.0364524
dnaK	B7HPL3	0.303351	0.316655	0.304752	0.306043	0.254397	0.290744	0.211796	0.24739	0.166533	0.235123	0.217339	0.210658	0.198378	0.190919	0.162023	0.188656	0.192661	0.202776
grpE	B7HPL4	0.113691	0.0975197	0.112918	0.0936434	0.0890235	0.0928909	0.130085	0.105647	0.164545	0.0746733	0.0750134	0.0906432	0.0539478	0.0788578	0.0568057	0.0527558	0.0439296	0.0757251
lepA	B7HPL8	0.0219594	0.0139459	0.0158184	0.00573923	0.00342343	0.0101211	0.00739496	0.00406268	0.00233847	0.0244085	0.0245197	0.0213984	0.00529018	0.0136463	0.00337601	0.00517329	0.00797737	0.0108291
rpsT	B7HPM1	0.368512	0.478095	0.242843	0.417356	0.385874	0.343468	0.255436	0.147719	0.102032	0.390495	0.293681	0.383037	0.346231	0.264628	0.343704	0.250801	0.220443	0.202498
aroE	B7HPN3	0	0	0.00393718	0	0	0	0	0	0	0	0.00646192	0.00737452	0	0.00339654	0	0	0	0
psd	B7HPN7	0.00383561	0.00452381	0.00399095	0	0	0	0	0	0	0.00369493	0.00655016	0.00373762	0	0	0.00383293	0.00391563	0.0144913	0.0105384
dnaA	B7HPR7	0.00908458	0.0133932	0.0212681	0.00771652	0.00920574	0.00680401	0.00497134	0.00273118	0.00314412	0.0153149	0.0213317	0.0110656	0.0118546	0.0101932	0.00680868	0.0069556	0.0128709	0.00831999
recF	B7HPS0	0.00264809	0.00312322	0.00275533	0	0	0	0	0	0	0.0102038	0.0135666	0.0103217	0.00552884	0.00475396	0.00264624	0.00540668	0.00250118	0.00485043
pdxS	B7HPS6	0.397085	0.421498	0.435703	0.314801	0.27435	0.26676	0.28446	0.20403	0.199896	0.42425	0.360632	0.401011	0.301476	0.265704	0.292195	0.280074	0.25231	0.284319
pdxT	B7HPS7	0.0643075	0.0442434	0.0724879	0.0424848	0.038013	0.0428123	0.0234606	0.0515555	0.0148376	0.0619488	0.073213	0.0731087	0.0391607	0.0625341	0.0428417	0.0218831	0.015185	0.0539871
serS	B7HPS8	0.0847759	0.0916545	0.085759	0.0640082	0.073975	0.0658455	0.0592784	0.0368144	0.0228203	0.0680554	0.0683654	0.0550734	0.0442501	0.0507311	0.0470648	0.0480804	0.0422606	0.0647006
	B7HPT5	0.154782	0.102687	0.130854	0.19721	0.245073	0.309136	0.211753	0.174501	0.0669616	0.177063	0.206505	0.160255	0.282769	0.303923	0.20301	0.316024	0.237567	0.221493
recR	B7HPT6	0.0417743	0.0369523	0.0217331	0.0118278	0.0211657	0.0208583	0.0114301	0.012559	0	0.0452724	0.0401282	0.0457955	0.0327072	0.0374976	0.036527	0.0159922	0.0394568	0.0239115
tmk	B7HPU1	0.0241343	0.0113858	0.0251117	0.0109333	0.00489123	0.00964036	0.00528279	0.00580456	0	0.0185993	0.0123644	0.0141106	0.0100778	0.0259962	0.0144705	0.00985514	0.00911815	0.0265237
	B7HPU4	0.0083363	0.0196641	0.00867392	0.0188824	0.016895	0.0249743	0.0273712	0.0200497	0	0	0.0142361	0	0.0261076	0.0224485	0.00833048	0.0170205	0.00787382	0.0152694
rsmA	B7HPV2	0.0280162	0.00826074	0.0291508	0.0158648	0.0212924	0.0209831	0.00766563	0.00421138	0.00484812	0.0269886	0.0328927	0.030713	0.0146235	0.00943048	0.0104987	0.00715018	0	0.00320728
ispE	B7HPV6	0.00363235	0	0.00755893	0	0	0	0	0	0	0.00699826	0.0124061	0.0141582	0	0	0	0	0	0
spoVG	B7HPV9	0.220391	0.247557	0.163798	0.451662	0.457296	0.408732	0.344584	0.315515	0.24699	0.323517	0.39429	0.409069	0.438235	0.395656	0.440475	0.3107	0.208165	0.240289
glmU	B7HPW0	0.0371274	0.0355785	0.060361	0.0183962	0.0164599	0.018538	0.0126982	0.00279048	0.0032124	0.0514131	0.0475525	0.0452236	0.0193792	0.0249948	0.0255073	0.0165821	0.0263007	0.0297523
coaX	B7HPX7	0.0315548	0.00930412	0.0123123	0.00893429	0.00399695	0.0157556	0	0	0	0.0265978	0.0235755	0.0230615	0.0247058	0.0106216	0.0315328	0.00402665	0.0186276	0.0108371
hslO	B7HPX8	0.0143183	0.00422183	0.0186227	0.00405401	0.0036273	0.0107238	0	0.00430462	0	0.0241379	0.0397339	0.0209287	0.00373682	0.0032131	0.0143083	0	0	0.00327829
lysS	B7HPY8	0.0875163	0.0680306	0.0889911	0.049558	0.0463573	0.0556151	0.0478914	0.043054	0.0275354	0.0613138	0.1019	0.0891569	0.0581388	0.0589174	0.0496905	0.0467016	0.0488452	0.0455401
tatA	B7HQ38	0.0167473	0.0197521	0.0174255	0.018967	0.0339412	0.0334482	0.0366583	0	0.0231845	0	0.0142999	0.0163194	0.017483	0.0150327	0.0502067	0.0170967	0.0632727	0.0306755
mtnN	B7HQD2	0.0636146	0.0428735	0.0756468	0.113216	0.115112	0.104365	0.0944889	0.11475	0.13839	0.0393952	0.0426785	0.0354225	0.0284611	0.0326296	0.0317851	0.0231935	0.0300427	0.0249688
greA	B7HQD7	0.250055	0.256116	0.19856	0.134147	0.233386	0.216853	0.201655	0.110786	0.145756	0.228206	0.207894	0.262904	0.26791	0.212642	0.243305	0.275426	0.27969	0.168744
udk	B7HQD8	0.0188601	0.00556103	0.02453	0.0160199	0.00955583	0.0141255	0.0103208	0.0170103	0	0.0317947	0.012078	0.0275675	0.00984434	0.0169293	0.0141352	0.00481341	0.00445345	0.00863639
	B7HQE4	0.0298747	0.035235	0.0388558	0.0422931	0.0227049	0.0298334	0.0326966	0.017963	0.020679	0.0215843	0.0255089	0.0363894	0.038984	0.0268162	0.0223904	0.0228735	0.0282174	0.0205203
	B7HQE5	0.0222181	0	0.0231179	0.0629074	0.0562861	0.0665621	0.0486335	0.0400777	0.0307582	0	0.0379424	0.0324757	0.0463884	0.0498587	0.0444052	0.0226817	0.041971	0.0305222
aspS	B7HQG0	0.0657367	0.06733	0.0593992	0.0587761	0.0525895	0.0570081	0.0340797	0.0228835	0.0263434	0.0583263	0.0516988	0.0505716	0.0343123	0.0279506	0.0224732	0.0176601	0.0261431	0.030102
dtd	B7HQG5	0.00702226	0.00828222	0.0146133	0.00795301	0.00711591	0.00701254	0	0.00844465	0.00972145	0.0067647	0.0119921	0.00684286	0.00733075	0.01891	0.0140347	0.00716877	0	0.00643123
apt	B7HQG7	0.104637	0.0798548	0.140897	0.0697097	0.0498979	0.0799061	0.0538923	0.0666171	0.0766894	0.0948702	0.126136	0.0959663	0.128511	0.1326	0.123017	0.182224	0.133714	0.146565
tgt	B7HQH6	0.0345114	0.0313105	0.0248601	0.0150329	0.0161408	0.0265105	0.0116219	0.00957735	0.00367514	0.0383603	0.058936	0.0284559	0.0277135	0.0285953	0.021223	0.0189708	0.0125372	0.0194503
queA	B7HQH7	0.0116542	0.0103089	0.0181892	0.00329972	0.0059048	0.00872853	0.00318875	0.0035037	0	0.0168401	0.0174144	0.0113564	0.00304154	0.00261526	0.00873453	0.00594867	0.00275191	0.00266833
ruvB	B7HQH9	0.00309205	0.00364684	0.00965183	0.00350188	0	0.00308777	0	0	0	0	0.00264018	0	0	0	0	0	0	0
ruvA	B7HQI0	0.0148429	0.00583538	0.0154441	0	0	0	0	0	0	0.00476618	0.00844923	0.0144637	0.00516501	0.00444112	0.0049442	0.00505088	0	0.0135937
nadA	B7HQI6	0.0744378	0.0552775	0.0602408	0.00936711	0.00838117	0.00550628	0.0090521	0.00331539	0.00381666	0.0504609	0.0470812	0.0295517	0.00575614	0.00494941	0.00551006	0.00562895	0.00520801	0.00504983
obg	B7HQJ8	0.0583538	0.0458826	0.0556573	0.0275368	0.0221745	0.0291365	0.0266107	0.0116956	0.010098	0.0374757	0.0456739	0.0379087	0.0279204	0.0240073	0.0291565	0.0223392	0.0206687	0.0334015
rpmA	B7HQK0	0.338632	0.489575	0.261418	0.346401	0.30994	0.316346	0.251064	0.197043	0.151224	0.368303	0.214527	0.35127	0.285087	0.284353	0.349311	0.178424	0.216669	0.180076
rplU	B7HQK2	0.254823	0.252457	0.233326	0.230878	0.154933	0.193397	0.15618	0.134833	0.0987759	0.216019	0.191474	0.208583	0.212814	0.219585	0.244459	0.114461	0.144412	0.121355
maf	B7HQL2	0.00543493	0	0.00565505	0.0061553	0	0.00542741	0	0.00653581	0	0.0052356	0.0185628	0.0158883	0.0113474	0.0195141	0.0162934	0.016645	0.0205337	0.029865
hemL2	B7HQM1	0.0374166	0.055898	0.0596956	0.0565012	0.0556095	0.0423468	0.0436809	0.0239976	0.0172662	0.100924	0.100106	0.0899363	0.0546845	0.07165	0.0673028	0.0585691	0.0541892	0.0616814
hemC	B7HQM4	0.0101965	0.00400865	0.0141459	0.00384931	0.00688829	0.0135765	0.00371986	0.00408727	0.00941049	0.0294674	0.0319234	0.0298079	0.00709626	0.0152543	0.0101893	0	0.012841	0.0155638
engB	B7HQM9	0	0.00604595	0	0	0	0	0	0	0	0.00987634	0.0131312	0.0149857	0	0.00460138	0.00512261	0	0	0
clpX	B7HQN2	0.139098	0.137689	0.118886	0.151908	0.130885	0.148827	0.116896	0.116494	0.0790887	0.143567	0.135738	0.128283	0.114092	0.10925	0.0843933	0.0760714	0.079767	0.081894
tig	B7HQN3	0.342698	0.346855	0.437502	0.214705	0.206883	0.21844	0.188864	0.172444	0.137953	0.353542	0.373553	0.355258	0.228353	0.259617	0.228306	0.193533	0.257112	0.269336
rph	B7HQP4	0.0382503	0.025063	0.0353773	0.0192534	0.0215336	0.0254649	0.0139544	0.0102218	0.0117673	0.0368474	0.0399184	0.0372731	0.017747	0.0228895	0.0297295	0.0130161	0.032114	0.0311387
mcsB	B7HQR4	0.0085997	0.0101427	0.017896	0.0129861	0.0087144	0.0085878	0.0156867	0.00689441	0.00793682	0.0110457	0.0195812	0.00838	0.0209475	0.0257309	0.0286457	0.0292638	0.0297829	0.0420049
disA	B7HQR7	0.00286088	0	0.00595349	0	0.00289903	0.00285692	0.00626221	0	0	0.00826785	0.012214	0.00557558	0.00597312	0.00513597	0.0114355	0.0146028	0.016213	0.0183407
ispF	B7HQS1	0.0199935	0.0157206	0.00693441	0.0150957	0.0135068	0.0266211	0.0437641	0.0400722	0.0369047	0.0128401	0.0284528	0.0129885	0.0139146	0.0179466	0.0266394	0.0136071	0.0251791	0.0305179
cysS	B7HQS4	0.0276384	0.025075	0.0287578	0.0216704	0.0172351	0.0212309	0.0209417	0.01534	0.0088297	0.0450572	0.0471989	0.0372909	0.0288526	0.0267172	0.0254946	0.0434078	0.0522102	0.0525716
rplK	B7HQT1	0.482761	0.524192	0.358795	0.520713	0.450374	0.466788	0.293534	0.239591	0.222775	0.472437	0.425298	0.545099	0.439973	0.405824	0.428822	0.305088	0.253321	0.224574
rplA	B7HQT2	0.426555	0.591544	0.44383	0.430005	0.337245	0.327665	0.30268	0.248022	0.246588	0.587014	0.464279	0.616634	0.35232	0.298734	0.374731	0.22969	0.177095	0.210352
rplJ	B7HQT3	0.470801	0.457726	0.456769	0.324245	0.283669	0.349435	0.327267	0.275431	0.325883	0.386116	0.320513	0.359579	0.352009	0.256987	0.349675	0.285776	0.198304	0.209761
rplL	B7HQT4	1.14593	1.26504	0.944333	0.830602	1.13334	0.970404	0.98327	0.826826	0.799545	0.697665	0.704496	0.803991	0.890027	0.724143	0.824494	0.851643	0.718685	0.604503
rpoB	B7HQT6	0.247964	0.176499	0.167478	0.134996	0.109325	0.111212	0.0761786	0.070101	0.0493836	0.233841	0.20207	0.205173	0.206178	0.197587	0.17128	0.166982	0.163535	0.158568
rpsL	B7HQT9	0.200591	0.227819	0.170064	0.244006	0.203266	0.22257	0.162621	0.0714729	0.0719945	0.307742	0.228369	0.289579	0.248181	0.186723	0.230147	0.166854	0.140342	0.108864
rpsG	B7HQU0	0.474838	0.499491	0.380566	0.363361	0.279599	0.3268	0.266868	0.231494	0.177663	0.531599	0.509547	0.550246	0.401917	0.368627	0.429621	0.235822	0.296976	0.26445
fusA	B7HQU1	0.671674	0.721299	0.670734	0.422044	0.366963	0.414151	0.307533	0.294539	0.241303	0.761392	0.739029	0.699906	0.519219	0.486913	0.471495	0.421844	0.44281	0.432114
tuf	B7HQU2	0.828748	0.867089	1.08206	0.663071	0.571607	0.544615	0.552995	0.485448	0.370097	0.968324	0.988409	0.909174	0.697707	0.664713	0.748025	0.619519	0.684293	0.678201
rpsJ	B7HQU3	0.530374	0.625537	0.490537	0.489437	0.487684	0.470791	0.451478	0.342525	0.353522	0.482537	0.369003	0.478541	0.492155	0.414362	0.402411	0.340907	0.259752	0.242868
rplC	B7HQU4	0.348929	0.405571	0.352537	0.24627	0.204976	0.207048	0.166038	0.115544	0.0980101	0.36536	0.392932	0.330159	0.242839	0.208804	0.217297	0.129061	0.176727	0.194516
rplD	B7HQU5	0.193546	0.228273	0.217283	0.121136	0.12387	0.111898	0.0891905	0.0918748	0.0987149	0.215886	0.243543	0.272975	0.18078	0.160015	0.193411	0.098792	0.0817826	0.0792988
rplW	B7HQU6	0.464636	0.389691	0.397506	0.292345	0.261574	0.288707	0.192109	0.136583	0.0857642	0.328236	0.335021	0.432643	0.334144	0.379995	0.340495	0.200273	0.224306	0.236406
rplB	B7HQU7	0.238966	0.134211	0.114455	0.189018	0.17681	0.174242	0.203419	0.0866672	0.0630133	0.288666	0.285014	0.262431	0.225706	0.194073	0.140247	0.127785	0.168386	0.142429
rpsS	B7HQU8	0.550706	0.445747	0.651658	0.281276	0.372034	0.291147	0.271817	0.207766	0.149487	0.624127	0.66385	0.757605	0.495992	0.571867	0.528741	0.31968	0.285575	0.346127
rplV	B7HQU9	0.567556	0.60461	0.466718	0.48727	0.417429	0.411365	0.290545	0.308233	0.215437	0.458556	0.437716	0.508455	0.468258	0.427281	0.448239	0.280354	0.233449	0.209592
rplP	B7HQV1	0.113634	0.0837644	0.0738977	0.0804348	0.0863623	0.141846	0.00777299	0.00854071	0.00983204	0.191566	0.212249	0.179938	0.103798	0.146626	0.134846	0.0580026	0.0670813	0.0650439
rpmC	B7HQV2	0.413626	0.644647	0.307413	0.46845	0.404173	0.45731	0.371858	0.301998	0.306758	0.398456	0.290112	0.403059	0.354691	0.29172	0.383814	0.301612	0.237198	0.175878
rpsQ	B7HQV3	0.382931	0.318804	0.363283	0.25511	0.251084	0.224942	0.209551	0.176072	0.0623672	0.368886	0.365438	0.438998	0.352724	0.404385	0.416428	0.229953	0.244671	0.195981
rplN	B7HQV4	0.428565	0.495144	0.354917	0.41603	0.345652	0.375567	0.315888	0.262945	0.242161	0.412846	0.253914	0.417616	0.328696	0.321883	0.340865	0.214289	0.223047	0.152192
rplX	B7HQV5	0.613201	0.566526	0.531697	0.567157	0.548885	0.500088	0.324376	0.319544	0.282967	0.669472	0.645761	0.707084	0.522781	0.605466	0.500432	0.333864	0.44404	0.393114
rplE	B7HQV6	0.603571	0.631278	0.580618	0.464312	0.38082	0.398033	0.324059	0.253355	0.236482	0.564978	0.500781	0.571505	0.45176	0.465112	0.500728	0.331334	0.333447	0.365038
rpsZ	B7HQV7	0.235943	0.241173	0.180032	0.160329	0.191272	0.14137	0.0860764	0.0567468	0.0435512	0.181831	0.174601	0.19926	0.213467	0.211787	0.22006	0.0963462	0.133712	0.0864339
rpsH	B7HQV8	0.647702	0.77301	0.625796	0.611293	0.476628	0.469704	0.371319	0.361631	0.309563	0.661086	0.520129	0.736348	0.643959	0.678291	0.64725	0.409324	0.39328	0.331903
rplR	B7HQW0	0.245159	0.299473	0.209536	0.277653	0.221811	0.262307	0.21082	0.115821	0.133333	0.303643	0.19438	0.332748	0.29249	0.227919	0.253737	0.214521	0.148859	0.1283
rpmD	B7HQW2	0.735177	1.05289	0.619247	1.12998	0.975572	0.83904	0.919565	1.03144	1.01776	0.421555	0.388601	0.443483	0.51165	0.408517	0.402316	0.62543	0.479461	0.336651
rplO	B7HQW3	0.296291	0.297035	0.315998	0.226504	0.202663	0.251498	0.0810693	0.0801688	0.0512722	0.37105	0.278291	0.389774	0.278376	0.292553	0.296084	0.158798	0.160915	0.17638
adk	B7HQW5	0.236567	0.239154	0.231077	0.0984204	0.136984	0.154279	0.142666	0.0870871	0.106938	0.237192	0.21024	0.254046	0.2016	0.190679	0.197805	0.138001	0.141362	0.159176
rpmJ	B7HQW8	0.52966	0.718399	0.275556	0.809816	0.751414	0.608266	0.405783	0.318473	0.329962	0.510234	0.47487	0.464516	0.414697	0.427891	0.449897	0.48664	0.400221	0.218287
rpsM	B7HQW9	0.398991	0.54901	0.406501	0.489531	0.429582	0.381837	0.291119	0.319873	0.253163	0.44041	0.454245	0.534597	0.442552	0.432757	0.539924	0.322459	0.329749	0.274058
rpsK	B7HQX0	0.434328	0.45315	0.391083	0.3973	0.389337	0.400363	0.265101	0.251107	0.173444	0.474721	0.427911	0.472066	0.392373	0.412354	0.425678	0.272855	0.307674	0.214185
rplQ	B7HQX2	0.44367	0.513212	0.372862	0.434834	0.406357	0.391934	0.308155	0.215467	0.21261	0.427397	0.284125	0.440649	0.43644	0.375272	0.392203	0.261304	0.217587	0.148466
rplM	B7HQX7	0.314339	0.288352	0.290728	0.158223	0.113255	0.146488	0.0917414	0.0672017	0.0773624	0.370101	0.375763	0.347149	0.226058	0.231996	0.272237	0.0998347	0.125358	0.14714
rpsI	B7HQX8	0.23757	0.280196	0.164795	0.242153	0.216665	0.205609	0.147339	0.1238	0.120592	0.205971	0.202853	0.223784	0.223207	0.191924	0.261145	0.145516	0.172033	0.130545
glmM	B7HQZ0	0.168279	0.153746	0.189891	0.209373	0.196943	0.213016	0.184174	0.151061	0.118122	0.230603	0.218567	0.22172	0.200414	0.168071	0.17053	0.176629	0.18133	0.221406
iolA	B7HR31	0.0498202	0.0408759	0.0676146	0.0269852	0.0285348	0.0346096	0.0355605	0.0208388	0.00899608	0.123112	0.133167	0.124535	0.10854	0.108883	0.123381	0.0950855	0.108434	0.11506
uvrC	B7HRG3	0.00167987	0.00198128	0	0	0	0	0	0	0	0.00323651	0.00286875	0.00163695	0	0	0.00167869	0	0.00317334	0.00153848
isdG	B7HRI4	0.0477999	0.0451011	0.0696301	0.0541355	0.0968749	0.0954675	0.020926	0.0114964	0.0132346	0.0920935	0.0734662	0.111789	0	0.0171625	0.00955332	0	0	0
mutS2	B7HRJ3	0.0156243	0.00921382	0.0149023	0.00884758	0.00923571	0.00780132	0.00855004	0.00469726	0	0.0213226	0.0277937	0.0241064	0.0176699	0.0233745	0.0169145	0.0172795	0.017217	0.0214639
rnhC	B7HRJ7	0.00334573	0	0.0104437	0.00757838	0.00339036	0.0033411	0	0	0	0.0161151	0.0114272	0.00652052	0.00349272	0.0120128	0.0100302	0.00341554	0.00316012	0.00919243
pheS	B7HRK2	0.0412202	0.0451436	0.0551438	0.0400146	0.04177	0.0411632	0.0257793	0.0177034	0.0122281	0.0737442	0.080449	0.0659889	0.0245892	0.0396431	0.0323647	0.0210401	0.0389334	0.0458405
rplT	B7HRL2	0.185469	0.208804	0.175437	0.229147	0.196485	0.185212	0.156854	0.0811042	0.0583543	0.146182	0.201555	0.180731	0.220019	0.234587	0.235887	0.154913	0.151291	0.146696
rpmI	B7HRL3	0.214324	0.28889	0.191146	0.381435	0.341287	0.275178	0.284833	0.128868	0.105966	0.250705	0.222218	0.208849	0.367572	0.192382	0.33656	0.296937	0.202434	0.154224
nrdR	B7HRL9	0.0445682	0.0225278	0.0331237	0.0216323	0.0258072	0.0190742	0.0139366	0.0153131	0.00881418	0.0368002	0.0434916	0.0434296	0.0265864	0.0342904	0.0318122	0.0194992	0.018041	0.0291551
mdh	B7HRN2	0.037683	0.0323231	0.0499026	0.0310383	0.0312428	0.0205259	0.0224959	0.0123589	0.0047425	0.0891023	0.0965284	0.0767789	0.0572197	0.0676503	0.0650435	0.0524581	0.0550065	0.0627481
pfkA	B7HRN9	0.183963	0.177522	0.198374	0.155313	0.149134	0.150307	0.131786	0.10458	0.0740872	0.170772	0.174215	0.169486	0.164111	0.141111	0.20389	0.180973	0.186394	0.174607
accA	B7HRP0	0.0786644	0.0334004	0.0753023	0.0498909	0.0542052	0.0408489	0.0585445	0.0227036	0.0130682	0.10306	0.0859759	0.116515	0.141247	0.146871	0.141497	0.0674568	0.112936	0.106625
accD	B7HRP1	0.0426575	0.0461187	0.0443851	0.0442855	0.0288176	0.0496982	0.0350151	0.025649	0.00492117	0.0547906	0.0637414	0.0623516	0.0853521	0.0861532	0.106569	0.0725792	0.0537213	0.0553453
	B7HRQ4	0	0.005444	0.00960551	0	0	0.00460942	0	0	0	0.0311256	0.0394127	0.0314852	0.024093	0.0248595	0.0276756	0.0329848	0.017439	0.0295913
argH	B7HRS7	0.00256388	0	0	0	0	0	0	0	0	0.00246985	0	0	0	0	0	0	0	0
argG	B7HS01	0.0146227	0.0172464	0.0152149	0.0110406	0.00493925	0.00973499	0.00533465	0.00586154	0	0.00939093	0.00832387	0.0142492	0.0101767	0.00437523	0.00974168	0.00497594	0.00920766	0.004464
rex	B7HS04	0.216523	0.174728	0.154147	0.219409	0.311794	0.307264	0.336754	0.287789	0.205092	0.285427	0.252995	0.322039	0.559139	0.613755	0.603563	0.62822	0.54895	0.49053
groL	B7HS05	0.459785	0.492769	0.601128	0.620344	0.4882	0.515045	0.555724	0.548109	0.487073	0.664382	0.650339	0.629202	0.755453	0.75365	0.771101	0.877534	0.910094	0.992302
purC	B7HS29	0.130612	0.129201	0.166589	0.0381739	0.0384254	0.0462821	0.0415014	0.0304003	0.0291639	0.113645	0.154696	0.119064	0.0615774	0.0642931	0.058945	0.0129036	0.0159182	0.0231521
purQ	B7HS31	0.103869	0.0639161	0.117474	0.0204585	0.0183051	0.0180392	0.0148279	0.0162924	0	0.0870082	0.123395	0.0968149	0.0141433	0.0364833	0.0270774	0.0138308	0.00426551	0.0206798
purL	B7HS32	0.247475	0.276694	0.241125	0.0972056	0.0913228	0.104281	0.0735837	0.0602085	0.0435675	0.23013	0.208867	0.224425	0.10304	0.0975871	0.0857696	0.0335878	0.0364805	0.0406129
purM	B7HS34	0.083036	0.068917	0.0767991	0.0243812	0.0311642	0.0368538	0.0235613	0.0295868	0.0127726	0.0622148	0.0472676	0.0659304	0.0385262	0.0193239	0.0399524	0.0156979	0.0203335	0.019716
purH	B7HS36	0.119702	0.133877	0.135287	0.0631091	0.0585578	0.0597681	0.0406579	0.0397098	0.0114285	0.111335	0.135691	0.106588	0.0603258	0.0537236	0.0515597	0.0505653	0.0526319	0.0567038
gpmA	B7HS46	0.0972857	0.0908367	0.113879	0.0688627	0.078045	0.0728633	0.0443646	0.0584957	0.016835	0.164006	0.186904	0.15405	0.177729	0.181929	0.214689	0.173802	0.183777	0.20047
thiI	B7HSI4	0.0150152	0.00590309	0.0182272	0	0	0.00499813	0	0	0	0.0216967	0.0299154	0.0219474	0.0156748	0.0179706	0.0100031	0.0127737	0.0189095	0.0343786
ezrA	B7HSI6	0.00517499	0.0020345	0.012564	0.0058609	0.00349601	0.00172261	0.00188793	0	0	0.018279	0.0176749	0.0184902	0.00540233	0.00774198	0.00344759	0	0.00488789	0.00473944
rpsD	B7HSJ2	0.639483	0.542097	0.644589	0.345147	0.344256	0.389146	0.273393	0.252333	0.214405	0.640092	0.661209	0.696171	0.464174	0.43948	0.54418	0.341714	0.287847	0.356888
murC	B7HSM3	0.0442892	0.0412388	0.0533592	0.0131999	0.0070863	0.0186223	0.00765358	0.00840951	0	0.0359283	0.0457784	0.0363434	0.0219007	0.0272008	0.0163057	0.0142779	0.0308237	0.0341572
	B7HSM8	0.00738937	0.0130728	0.00768863	0.0125532	0.00748792	0.00368957	0	0	0	0.021355	0.0189285	0.0216018	0.026999	0.0265314	0.0295368	0.0150871	0.0139588	0.0203023
trmB	B7HSN5	0	0	0	0	0	0	0	0	0	0.0043182	0.0153101	0	0	0	0	0	0	0
moaC	B7HSR1	0.0131382	0.00774773	0.00683512	0.0148795	0.00665669	0.01968	0.0143791	0	0	0.0126563	0.00560909	0.0128025	0.00685767	0.00589655	0	0	0	0
leuS	B7HSS7	0.0628042	0.0548139	0.0653478	0.0369868	0.0394579	0.0501738	0.0178715	0.0151051	0.0121723	0.0738109	0.0568438	0.0526318	0.0406493	0.0338247	0.0276146	0.0423157	0.041524	0.0402629
metK	B7HSV6	0.111367	0.109458	0.115878	0.0991009	0.0967309	0.108565	0.104474	0.0892836	0.0734164	0.140489	0.110941	0.131777	0.121796	0.104726	0.11129	0.21114	0.227909	0.208845
pckA	B7HSV7	0.0772629	0.0864526	0.0948213	0.0314115	0.0220827	0.0356104	0.0195141	0.0142943	0.0191981	0.209928	0.201299	0.187257	0.206813	0.158267	0.182134	0.169884	0.181506	0.190508
pcrB	B7HSW3	0.00899476	0.015913	0.00935904	0.010187	0.00911472	0.0134735	0.00492219	0.0108167	0	0.0129973	0.00768029	0.0175299	0.00938991	0.0121108	0.00449424	0.00918243	0.00424787	0.00411886
ligA	B7HSW5	0.0427273	0.0305961	0.0444577	0.0207388	0.0201022	0.0320011	0.0200414	0.0110104	0.00633757	0.0396901	0.046907	0.0342008	0.0143371	0.0315042	0.0243985	0.0186938	0.0259437	0.0321435
rocA	B7HSW8	0.291862	0.337007	0.344031	0.194167	0.177866	0.165091	0.122858	0.103085	0.067812	0.353904	0.36423	0.365948	0.230111	0.199692	0.220273	0.229193	0.242898	0.25982
gatC	B7HSX9	0.116164	0.0996414	0.0879046	0.0598005	0.0856098	0.116003	0.0809052	0.0761967	0.0438587	0.0508653	0.0541027	0.0720342	0.0220486	0.0758339	0.0633181	0.0431229	0.0498726	0.0580295
gatA	B7HSY0	0.0855506	0.1009	0.100428	0.0596245	0.0511258	0.0591453	0.0456153	0.039569	0.0212574	0.0697339	0.0955249	0.0919152	0.0526694	0.0571018	0.059186	0.0604631	0.0642292	0.0602694
gatB	B7HSY1	0.127218	0.124613	0.130127	0.100123	0.0830297	0.118429	0.0920364	0.0700108	0.0477607	0.143323	0.117832	0.12817	0.103544	0.0909678	0.0969629	0.0924515	0.0936842	0.108612
thiM	B7HT69	0.061269	0.0385398	0.0722504	0.0786418	0.053808	0.0571053	0.0625859	0.0589435	0.045237	0.0629566	0.0627784	0.047763	0.0810168	0.0586628	0.0693898	0.0792267	0.0655859	0.0523715
thiE	B7HT70	0.0583922	0.057391	0.106325	0.0991975	0.103549	0.0923263	0.111839	0.14044	0.121255	0.0703131	0.0706334	0.0711255	0.0609574	0.0698855	0.0729393	0.0447079	0.0735369	0.0534776
	B7HTE7	0.00562539	0	0.0117064	0	0.00570041	0.0056176	0.00615674	0	0	0.00541906	0.0240165	0.0109633	0.011745	0.0151484	0.0112429	0.0172283	0.0371931	0.0412154
luxS	B7HTQ2	0.0771232	0.0303203	0.0802466	0.0291151	0.0390759	0.0449262	0.028136	0.0231862	0.0355892	0.0742945	0.0713403	0.0876783	0.073802	0.0807654	0.0642245	0.0656103	0.0849853	0.0706321
pgi	B7HTY6	0.148129	0.13439	0.165984	0.136791	0.108537	0.138821	0.0972724	0.0849558	0.0757168	0.182212	0.165399	0.166551	0.123709	0.116599	0.12753	0.132608	0.135606	0.146097
	B7HTZ9	0.0265277	0.0156437	0.0138011	0.0150219	0.0403223	0.026491	0.0290335	0.0638021	0.0367244	0	0.0113255	0.012925	0	0	0.0132546	0.0270812	0.0375841	0.0364426
recX	B7HU51	0	0	0	0	0	0	0	0	0	0	0.00304933	0	0.0037281	0	0.00356872	0	0	0
sspK	B7HU54	0	0	0	0.0218587	0.0391159	0	0.0211236	0.04642	0.0267193	0	0	0	0	0	0	0.216736	0.182298	0.194438
	B7HU62	0	0	0.00568354	0.00618631	0	0.00545476	0	0.00656874	0	0.00526197	0	0.00532277	0	0	0.00545851	0	0.0103186	0.0100052
hemL1	B7HU66	0.0394948	0.0349358	0.0410943	0.0195692	0.0175094	0.0345101	0.0162095	0.00890524	0	0.0499356	0.048477	0.0481072	0.0309224	0.0288042	0.0419339	0.0302391	0.0396352	0.03391
[truncated: 67 more rows]
