# Supplementary material for: Bacillus cereus Decreases NHE and CLO Exotoxin Synthesis to Maintain Appropriate Proteome Dynamics During Growth at Low Temperature
Source: Toxins (Basel). 2020 Oct 6;12(10):645. doi: 10.3390/toxins12100645 (PMC7601483; doi:10.3390/toxins12100645)
Supplement: Supplementary file 1 [file toxins-12-00645-s001.zip › Table S2 new.xlsx]

## Sheet: Table S2
Table S2 :Classification of cellular proteins using Hierarchical Clustering on Principal Components
Results of HCPC clustering
Cluster 1 (1604proteins)			Cluster 2 (322)	Cluster 3 (98)	Cluster 4 (18)	Cluster 5 (19)	Cluster 6(2)
CL1-1	CL1-2	CL1-3	CL2	CL3	CL4	CL5	CL6
A1BYG6	A1BYZ8	A1BYI0	A1BYH8	A1BYZ2	B7HXP4	B7HXP5	B7HZX9
A1BYM8	A1BYG9	B7HTG8	A1BYI4	A1BZ18	B7HNA1	B7HW56	B7HZQ7
Q20CI6	Q20CI8	B7HVI8	B7HL25	B7HLB4	B7HK99	B7HRG4
A1BZ20	A1BYY5	B7HTP5	B7HRG0	B7HMU1	B7HUU3	B7HT24
A1BYH7	A1BYM7	B7HZU9	B7HTZ4	B7HUX2	B7HWD7	B7HLF9
A1BYI2	B7HUK8	B7HW98	B7HPS1	B7HY95	B7HN40	B7HQT4
A1BYQ6	B7HUQ8	B7HRM0	B7HLN0	B7HU01	B7HZM0	B7HQU1
A1BYH6	B7HRV5	B7HPY6	B7HPX2	B7HKT3	B7HMQ2	B7HQU2
A1BYV1	B7HRX9	B7HR52	B7HZV4	B7I0D1	B7HND4	B7HQU8
A1BZ19	B7HLK4	B7HXG3	B7HRN4	B7HLG8	B7HMQ3	B7HQV5
A1BYI8	B7HK60	B7HYD4	B7HVZ7	B7HR96	B7HXE3	B7HQV6
A1BZ06	B7HZA5	B7HYD8	B7HSL7	B7HQW1	B7HN27	B7HQV8
A1BYX0	B7HV44	B7HLU1	B7HYG5	B7I0J0	B7HK52	B7HQW2
A1BYI7	B7HLC2	B7HR49	B7HZQ3	B7HLP6	B7HTX1	B7HQW8
A1BYM9	B7HZ50	B7HYP7	B7HZY1	B7HL20	B7HLI3	B7HS05
A1BYW4	B7HYW5	B7HX67	B7HKD9	B7HL08	B7HUY1	B7HSJ2
A1BYZ9	B7HV97	B7HWK4	B7HMV8	B7HQR5	B7I0F3	B7HW52
A1BYS9	B7HKG8	B7HNT3	B7I047	B7HRT7	B7HLW0	B7HXM4
A1BYS3	B7HPF5	B7HMQ4	B7HN71	B7HT96		B7HY91
A1BYH1	B7HK89	B7HW00	B7HTW5	B7I0L9
A1BZ01	B7HPR0	B7HK67	B7HQL0	B7HRL4
A1BYG8	B7HN41	B7HS68	B7I0D3	B7HW17
A1BYV0	B7HLM6	B7HU72	B7HWF0	B7HQV0
B7HQS5	B7HS50	B7HXW4	B7HV01	B7HKU2
B7HY30	B7HPS2		B7I0M3	B7HZS5
B7HVR6	B7HPI5		B7HK59	B7HTR5
B7HRL7	B7HVC6		B7HX20	B7HU83
B7HPN0	B7HZV7		B7HK75	B7HRG5
B7I065	B7HUS1		B7HNU6	B7HSI3
B7HWZ6	B7HP83		B7HVZ6	B7HLB0
B7HRC9	B7HPH5		B7HN65	B7HMT9
B7HVG6	B7HZ97		B7HWA6	B7HT23
B7HW90	B7HT27		B7HY96	B7HPX9
B7HQ89	B7HPZ8		B7I0A6	B7HRN8
B7HS72	B7HUT0		B7HL59	B7I033
B7HLV3	B7HZG6		B7I0I7	B7HKQ9
B7HUU1	B7HLC1		B7HZ83	B7HN00
B7HL67	B7HN52		B7HYS5	B7HNS8
B7HNH5	B7HT51		B7HLE9	B7HRN3
B7HWC2	B7HZV8		B7HX91	B7HR53
B7HRG9	B7HY37		B7HQQ2	B7HZH5
B7HXA6	B7I0C4		B7HY78	B7HZT0
B7HKH0	B7HTP9		B7HRT5	B7HXL9
B7HQT5	B7HN68		B7HLC6	B7HRG6
B7HNM5	B7HLI5		B7HPF9	B7HY80
B7HN30	B7I0D9		B7HX18	B7HN54
B7HNQ5	B7HUV3		B7HLA4	B7HQV9
B7HNA8	B7HSH9		B7HMU2	B7I0M2
B7HXS4	B7HLJ3		B7HXT1	B7HLE1
B7HQ11	B7HS66		B7HR47	B7HLF7
B7HZD1	B7HQ45		B7HSM7	B7HLG0
B7HZ96	B7HY92		B7HYP2	B7HLG1
B7HVK9	B7HSG1		B7HUX1	B7HLH3
B7HNX2	B7HX26		B7HWY4	B7HLH7
B7HVU7	B7HPY4		B7HQI7	B7HMX7
B7HV13	B7HPJ9		B7HLA5	B7HPK8
B7HRM5	B7HV86		B7HR46	B7HPL3
B7HY44	B7HPM9		B7HNU7	B7HPM1
B7HV59	B7HY45		B7I088	B7HPS6
B7I026	B7HNK6		B7HSD0	B7HPT5
B7HLI1	B7HN23		B7HRQ5	B7HPV9
B7HL58	B7HKC5		B7HYC4	B7HQD7
B7HW67	B7HVX9		B7HRG7	B7HQK0
B7HMT7	B7HQG1		B7HYB9	B7HQK2
B7HU55	B7HT26		B7HYW2	B7HQN3
B7HX08	B7HRM8		B7HUW9	B7HQT1
B7HYP3	B7HSY2		B7HPS4	B7HQT2
B7HMG0	B7HR41		B7HVE6	B7HQT3
B7HRZ3	B7HVH4		B7HR44	B7HQT9
B7HY77	B7HSW2		B7HX69	B7HQU0
B7HZK8	B7HSJ5		B7HLF8	B7HQU3
B7HTZ1	B7HRM6		B7HQW7	B7HQU4
B7HQP5	B7HNS6		B7HLA7	B7HQU6
B7HQG8	B7HMC8		B7HRY6	B7HQU7
B7HTU6	B7HPJ1		B7HZG2	B7HQU9
B7HST0	B7HUF6		B7HX16	B7HQV2
B7HRT6	B7HRZ0		B7HT95	B7HQV3
B7HKQ4	B7HPU9		B7HW53	B7HQV4
B7HMU6	B7HSF8		B7I0E7	B7HQW0
B7HKV6	B7HN17		B7HMQ5	B7HQW3
B7HQD3	B7I048		B7HS37	B7HQW5
B7HR14	B7HWU7		B7HN19	B7HQW9
B7HX27	B7HPV8		B7HNR1	B7HQX0
B7HRK3	B7HKC4		B7HPW1	B7HQX2
B7I074	B7HNA7		B7HX75	B7HQX7
B7HNG4	B7HZC0		B7HY93	B7HQX8
B7HLP9	B7HQH0		B7HZI0	B7HQZ0
B7HL03	B7HSJ0		B7HPC9	B7HRL3
B7HVP7	B7HRL5		B7HLA8	B7HS04
B7HV12	B7HLD2		B7HQZ1	B7HSW8
B7HZJ2	B7HQJ1		B7HMC0	B7HW54
B7I025	B7HWJ4		B7HS30	B7HW55
B7HUZ1	B7HS71		B7HZQ2	B7HY64
B7HWV0	B7HNH8		B7HR45	B7HZF6
B7HSN6	B7HRP7		B7HZ13	B7HZF9
B7HVK8	B7HLK8		B7HN99	B7HZG1
B7HTX5	B7HUJ7		B7HKC3	B7I0F0
B7HY19	B7HTS9		B7HL57	B7I0F2
B7HUG1	B7HML0		B7HXU4
B7HZB2	B7HVK0		B7HNU8
B7HP10	B7HPI3		B7HVW7
B7HSQ8	B7HQD0		B7HWJ3
B7HUJ9	B7HRY5		B7HVK2
B7HLE2	B7HQK9		B7HT32
B7HNT6	B7HSN2		B7HQM2
B7I0A3	B7HWU6		B7HY89
B7HQ68	B7HNL1		B7HX12
B7HXV0	B7HYG9		B7HLD1
B7HXL2	B7HLQ3		B7HNS4
B7HV58	B7HKG0		B7HKS1
B7HND3	B7HKI1		B7HWF3
B7HQ93	B7HQI4		B7I0E8
B7HNV8	B7HWM5		B7HSL6
B7HS43	B7HPF6		B7HZV9
B7HUT4	B7HQQ4		B7HMU0
B7HRZ1	B7HX68		B7HZH9
B7HX99	B7HXL3		B7I0I5
B7HUZ0	B7HLJ8		B7HLL6
B7HTQ8	B7HRY4		B7HW93
B7HNC0	B7HMC1		B7HX24
B7HSW6	B7HPI9		B7HYE8
B7HZ43	B7HLI0		B7HS28
B7HRX6	B7HUU2		B7HX23
B7HNK9	B7HN25		B7HRR5
B7I080	B7HYE0		B7HUU6
B7HY18	B7HL26		B7HQ76
B7HNN2	B7HNN6		B7HKP7
B7HSM4	B7HN31		B7HMD1
B7HLK6	B7HNQ4		B7HM02
B7HY85	B7HQS6		B7HRM2
B7HZU2	B7HZ49		B7HSN1
B7HZ25	B7HQN0		B7HMJ6
B7HUB9	B7HTQ4		B7HYM5
B7HNZ9	B7HK72		B7HT33
B7HR30	B7HQ30		B7HUY2
B7HZE8	B7HW02		B7HZE3
B7HZM9	B7I0L8		B7HQK6
B7HKB4	B7HKE3		B7HSJ9
B7HSB4	B7HQ34		B7HME1
B7HZE9	B7HQM0		B7HVG2
B7HQN4	B7HXQ0		B7HM43
B7HY13	B7HM25		B7HXZ6
B7HUV0	B7HZG5		B7HZQ0
B7HMW6	B7HZU1		B7HY82
B7HNI8	B7HZL6		B7HVX5
B7I0I6	B7HUV6		B7HQT7
B7HT38	B7HNK4		B7HRL0
B7HZU8	B7HNI7		B7HUX4
B7HTV6	B7HQY1		B7HTZ7
B7HTS5	B7HX15		B7HKM1
B7HRQ2	B7HK77		B7HL28
B7HSB1	B7HV63		B7HUI7
B7HSZ2	B7HLF3		B7HSR7
B7HML2	B7HWB9		B7HRU4
B7HTP2	B7HQ92		B7HQS2
B7HQ51	B7HNU9		B7HWE7
B7HYZ0	B7HTE5		B7I053
B7HNN3	B7HYD0		B7HLJ0
B7HQJ0	B7HP99		B7HWZ3
B7HQL3	B7HPS5		B7HN20
B7HX37	B7HW66		B7HUX0
B7HKQ5	B7HWC4		B7HLI4
B7HMY0	B7HXN7		B7HLH8
B7HTD8	B7HZG0		B7I062
B7HWM9	B7HNX3		B7HQX1
B7HNM6	B7HV04		B7HXT0
B7HSK0	B7HVG9		B7HMF4
B7HXK5	B7HX11		B7HL70
B7HQF7	B7HWZ4		B7HN26
B7HTP3	B7HYF2		B7HUR2
B7HPJ6	B7HTF2		B7HLI9
B7I066	B7HPR8		B7HLD4
B7HNZ8	B7HZH0		B7HZD0
B7HKI7	B7HSZ7		B7HSY9
B7HLJ6	B7HLD8		B7HVC5
B7HUG8	B7HTG2		B7HL19
B7HVV7	B7HRH1		B7HZF4
B7HLP5	B7HZF3		B7HKC0
B7HM96	B7HS27		B7HRR7
B7HPH9	B7I0J5		B7HS06
B7HVB8	B7HPE8		B7HZW0
B7HPP8	B7HNS5		B7HRI9
B7HP26	B7HLD3		B7HRP3
B7HZE7	B7HQN8		B7HSL5
B7HWB4	B7HLH1		B7HSP1
B7HNQ2	B7HT34		B7HL16
B7HZB3	B7HL32		B7HPN2
B7I0E1	B7HR26		B7HQL5
B7HPF4	B7HWF6		B7HVB7
B7HTK2	B7HVA2		B7HSI1
B7HZP8	B7HLT0		B7HVH3
B7I093	B7HZJ6		B7HR95
B7HMK9	B7HQF6		B7HVA4
B7HKX4	B7HKQ3		B7HQ70
B7HWJ9	B7HPW8		B7HNS3
B7HZ66	B7HZ18		B7HLB2
B7HZK1	B7HSQ3		B7HLB3
B7HL04	B7HQF4		B7HPG6
B7HMI1	B7I002		B7HMR5
B7HUN8	B7HM28		B7HSM9
B7HZQ4	B7HX10		B7HNR9
B7HS11	B7HQM8		B7I0M1
B7HKL2	B7HZT7		B7HZV1
B7HX53	B7HYE5		B7HX29
B7HPH7	B7HND9		B7HQY7
B7HQ77	B7HZV0		B7HVL4
B7HM21	B7HR28		B7HQE6
B7HKV7	B7HNR2		B7HRK1
B7HP18	B7HQ50		B7HW14
B7HMJ1	B7HKY1		B7HPX5
B7HQR3	B7HU17		B7HYH6
B7HMU9	B7HN07		B7HQA3
B7HPT0	B7HQ33		B7HW94
B7HY35	B7HTR3		B7HUW8
B7HQ08	B7HRD0		B7I0H1
B7HMM6	B7HN73		B7HMJ7
B7HXU2	B7HRH9		B7HPU8
B7HRB1	B7HPU3		B7HNS9
B7HU94	B7HW46		B7HR27
B7HP35	B7HNC3		B7HUS0
B7HSL4	B7HP02		B7HNW1
B7HMT8	B7HQP1		B7HNT4
B7I0G9	B7HL90		B7HVI3
B7HZK2	B7HQS8		B7HW68
B7HNI0	B7HT76		B7HUQ7
B7HQ23	B7HT92		B7HL78
B7HT46	B7HPJ2		B7HPX6
B7HNX1	B7HNB6		B7HQH5
B7HQ84	B7HWE1		B7HQ00
B7HUN5	B7HZ70		B7HR33
B7HNI9	B7HZZ6		B7HUB3
B7I036	B7HM20		B7HK76
B7HR23	B7HMM2		B7HMW3
B7HX81	B7HXC9		B7HPS9
B7I0D2	B7HS70		B7HMU8
B7HWA9	B7HU59		B7HLE8
B7HNB3	B7HQ41		B7HSL3
B7HVA6	B7HKE8		B7HYH7
B7HX98	B7HP13		B7HMU5
B7HNT7	B7HY06		B7HNG8
B7HVT0	B7HLM1		B7HPR9
B7HY97	B7HLC5		B7HM27
B7HKF6	B7HYD6		B7HRK0
B7HWX3	B7HYB7		B7HWD6
B7HUH4	B7HYE1		B7I1K3
B7HK92	B7I0F6		B7I1K5
B7HVK7	B7HQ07		B7HKP5
B7HSA0	B7HRF9		B7HKR8
B7HPW2	B7HLB9		B7HL21
B7HTI9	B7HXS9		B7HL82
B7HZU3	B7I0K8		B7HLE0
B7HZH1	B7HN66		B7HLE6
B7HMB0	B7HS67		B7HLG2
B7HMN4	B7HMW9		B7HLG9
B7HU00	B7HLN2		B7HLJ1
B7HM37	B7HKT8		B7HLK3
B7HQ36	B7HMF9		B7HLL7
B7HW84	B7I0D7		B7HLM0
B7HWX9	B7HS26		B7HLM5
B7HTG9	B7HWF2		B7HM44
B7HL77	B7HKS5		B7HMD4
B7HMK7	B7HYA4		B7HMU7
B7HV61	B7I030		B7HMV2
B7HLR5	B7HXA5		B7HNM9
B7HK97	B7HU81		B7HNN1
B7HZY9	B7HM50		B7HNT8
B7HQZ8	B7HLE7		B7HNU4
B7HYX7	B7HV03		B7HNY9
B7HXT4	B7HM35		B7HNZ0
B7HY86	B7HZU5		B7HNZ1
B7HPW7	B7HWM2		B7HP29
B7HY38	B7HWK9		B7HPH8
B7HN69	B7HMY2		B7HPL4
B7HT52	B7HLD5		B7HPS8
B7HKW0	B7HL89		B7HPY8
B7HM36	B7I091		B7HQD2
B7HVJ9	B7HY40		B7HQG7
B7HZW7	B7HTX2		B7HQM1
B7HV99	B7HZG9		B7HQN2
B7HSB7	B7HZW9		B7HQT6
B7HT50	B7HZE4		B7HQU5
B7HX77	B7HTH5		B7HQV1
B7HT82	B7HUR3		B7HQV7
B7HUY7	B7HXD0		B7HR31
B7HPC8	B7I0I8		B7HRL2
B7HQC7	B7HT74		B7HRN2
B7HL83	B7HXU7		B7HRN9
B7HUW2	B7HKA8		B7HRP0
B7HST6	B7HKZ9		B7HRP1
B7HVC4	B7HLN7		B7HS29
B7HW03	B7HMJ0		B7HS32
B7HVH6	B7HZV6		B7HS36
B7HYG8	B7HQ62		B7HS46
B7HVZ3	B7HYA3		B7HSV6
B7HMV9	B7HLB1		B7HSV7
B7HMK3	B7HR48		B7HSX9
B7HXE6	B7HVA1		B7HSY0
B7HSM0	B7HRL1		B7HSY1
B7HPM7	B7HPK0		B7HT69
B7HLJ4	B7HU71		B7HT70
B7HM30	B7HQT0		B7HTQ2
B7HUD0	B7HZD9		B7HTY6
B7HPF7	B7HLC7		B7HUD5
B7HQI8	B7HPK7		B7HUR5
B7I0C5	B7HPV7		B7HWF4
B7HZA2	B7HQA0		B7HX62
B7HUH7	B7HKY5		B7HY36
B7HQ32	B7HVZ8		B7HY65
B7I0G1	B7HRI0		B7HY67
B7HXX6	B7HS33		B7HY68
B7HQE2	B7I1N1		B7HY69
B7HZI1	B7I1K4		B7HY75
B7HYG7	B7I1H8		B7HY76
B7HRD1	B7HK66		B7HY98
B7HQ46	B7HK95		B7HY99
B7HZJ4	B7HKB7		B7HYE9
B7HU37	B7HKE6		B7HZT6
B7HPH3	B7HKU6		B7I0E0
B7HP28	B7HKX2		B7I0E9
B7HNL8	B7HL06		B7I0F1
B7HPK3	B7HL14		A1BYI3
B7I0J7	B7HL27		A1BYN6
B7HUG6	B7HL46
B7HV45	B7HL74
B7HUN6	B7HLB5
B7HNP0	B7HLF0
B7HZB1	B7HLF2
B7HRI5	B7HLG3
B7HL49	B7HLG5
B7HME7	B7HLI2
B7I0B3	B7HLI6
B7HP08	B7HLJ9
B7HVW6	B7HLK5
B7HV38	B7HLL8
B7HWC0	B7HLM2
B7HVM6	B7HLM9
B7HTS8	B7HM19
B7HLC4	B7HM33
B7HVG5	B7HM42
B7HZY6	B7HME6
B7HKF2	B7HMI7
B7HU77	B7HMP7
B7HRZ6	B7HMQ9
B7HYA1	B7HN32
B7HKH2	B7HN53
B7HWA5	B7HN67
B7HMZ6	B7HND7
B7HPL0	B7HNM8
B7HTW7	B7HNS7
B7HTN6	B7HNU5
B7HNN7	B7HNW0
B7HN13	B7HNW6
B7HS64	B7HPJ5
B7HSK1	B7HPK2
B7HKD0	B7HPL2
B7HL63	B7HPS7
B7HUA0	B7HPT6
B7HVY8	B7HPV2
B7HYW7	B7HPW0
B7HYC0	B7HPX7
B7HPU7	B7HQ38
B7HZZ0	B7HQE4
B7HWS0	B7HQE5
B7HKF3	B7HQG0
B7HXE5	B7HQH6
B7HTR9	B7HQI6
B7HZL5	B7HQJ8
B7HNK7	B7HQP4
B7HSM2	B7HQR4
B7HK78	B7HQS1
B7HMD5	B7HQS4
B7HKL0	B7HRI4
B7HNC2	B7HRK2
B7HX33	B7HRL9
B7HU15	B7HRQ4
B7HVP9	B7HS31
B7HS85	B7HS34
B7HP16	B7HSM3
B7HQ35	B7HSS7
B7HP84	B7HSW5
B7HYX3	B7HU54
B7HQC0	B7HU66
B7HN95	B7HU74
B7HLU7	B7HUW3
B7HZX3	B7HVH9
B7I090	B7HVJ1
B7HXF1	B7HVU6
B7HZ78	B7HW83
B7HYG2	B7HY63
B7HSN4	B7HY70
B7HLT9	B7HYS8
B7HKT5	B7HZG7
B7HLP1	B7HZH4
B7HNK0	B7HZH8
B7HMP2	B7I0H2
B7HNT9
B7I054
B7HXU0
B7HZ07
B7HYC9
B7HLC3
B7HZS8
B7HVT1
B7HPT4
B7HKD7
B7HZB0
B7HRG1
B7HN02
B7HM12
B7HU09
B7HT09
B7HR51
B7HRM7
B7HVA0
B7HYP9
B7HMW0
B7HUC9
B7HZR3
B7HQD9
B7HXN9
B7HQF3
B7HY94
B7HKV9
B7HNM1
B7HWP7
B7HUH8
B7HTC1
B7HXX7
B7HU49
B7HVS3
B7HPX3
B7I009
B7HYP4
B7HQF5
B7HVV0
B7HRZ4
B7HNP1
B7HSM5
B7HXT3
B7HU44
B7HP81
B7HXT7
B7HPU5
B7HYR1
B7HY00
B7HVC3
B7HKW1
B7HUX3
B7HXB4
B7HW40
B7HZY7
B7HNG9
B7HVY1
B7HR54
B7HKH3
B7HU65
B7HZL8
B7HRD9
B7HRG2
B7HTS0
B7HNN5
B7HZA1
B7HV71
B7HW37
B7HN12
B7HKM6
B7HQ87
B7HX90
B7HRR1
B7HP31
B7HU36
B7HLB6
B7HQ90
B7HVU5
B7HP51
B7HNL0
B7HLF1
B7HNL7
B7HRJ0
B7HKG3
B7HMX8
B7I049
B7HPL6
B7HLG6
B7HTR0
B7HPF0
B7HU22
B7HKR6
B7HLV4
B7HN94
B7I003
B7HT08
B7HZB8
B7HP37
B7HPV5
B7HW82
B7HKY2
B7HYD9
B7HQ21
B7HPK9
B7HQR6
B7HLI8
B7HLK7
B7HZZ1
B7HMW7
B7HUF7
B7HUU9
B7I082
B7HRY1
B7HQP3
B7HYC6
B7HZJ9
B7I0J2
B7HM31
B7HUS7
B7HPE4
B7HTV0
B7HZS9
B7HWL7
B7HMD6
B7HUP3
B7HWM4
B7HKJ3
B7HSZ3
B7HXY9
B7HQ82
B7HNH0
B7I0B9
B7HPK4
B7I0G4
B7HXF2
B7HTX6
B7HMY8
B7HWK6
B7HQ69
B7HUA8
B7HPG3
B7HVD8
B7HK90
B7HYN2
B7HSI5
B7HRF7
B7HP06
B7HW47
B7HK71
B7HRE6
B7HVD0
B7HR29
B7HNU1
B7HPR5
B7HLB7
B7HX89
B7I035
B7HQI3
B7HMF3
B7I0C8
B7HXN2
B7HMW2
B7HPU2
B7HYH9
B7HV51
B7HW96
B7HQN1
B7I0H0
B7HVU9
B7HRH8
B7HN55
B7HNV0
B7HSP5
B7HYZ7
B7HTM5
B7HS69
B7HQY0
B7HZK5
B7HWL1
B7HPY1
B7I0C0
B7HYQ2
B7HQ01
B7HZ60
B7HKX0
B7HWE6
B7HV47
B7HND6
B7HVY6
B7HKT6
B7HUQ5
B7HQ86
B7HZX0
B7HXB5
B7HPP1
B7HZ39
B7HN21
B7HYX5
B7HSP3
B7HT58
B7HT41
B7HYT3
B7HY59
B7HL10
B7HYZ4
B7HZC2
B7HZA4
B7HWK1
B7HM15
B7HMZ1
B7I098
B7HQE0
B7HLU8
B7HQ44
B7HU16
B7HR07
B7HZF2
B7HN33
B7HXR4
B7I0B0
B7HMB5
B7HYW8
B7HMY4
B7HV39
B7HV05
B7HUC5
B7HQ73
B7HNB5
B7HQ49
B7HLV7
B7HX88
B7HPQ9
B7HT62
B7HTI7
B7HS13
B7HXS6
B7HRK8
B7HSG4
B7HPN5
B7HXP0
B7HZE2
B7HTH1
B7HQR2
B7HYT2
B7HQW4
B7HS62
B7HML3
B7HZR6
B7HQI9
B7HYH4
B7HTY2
B7HL91
B7HWQ3
B7HVA7
B7HS35
B7HYJ3
B7HKJ9
B7HUF8
B7HV64
B7HR56
B7HZF7
B7I078
B7I070
B7HWC3
B7HMH8
B7HLK2
B7HPG8
B7HMA3
B7HMD7
B7HVP2
B7HQR9
B7HNJ6
B7HZI9
B7HV08
B7HQY9
B7HN01
B7HK64
B7HX97
B7HRR6
B7HKU8
B7HZ94
B7HR64
B7HT21
B7HTU2
B7HPM8
B7HVE3
B7HXX5
B7HP97
B7HS52
B7HQD5
B7HNJ3
B7HM17
B7HKW9
B7HSR0
B7HQ02
B7HKP6
B7HLA9
B7HS89
B7HNI4
B7HTG4
B7HLU0
B7HL96
B7HRF8
B7HXN3
B7HSY7
B7HWW4
B7I044
B7HTW8
B7HMW5
B7HR37
B7HMA6
B7HNG3
B7HT42
B7HM62
B7HNL4
B7HXZ4
B7HW01
B7HKX6
B7HVN6
B7HZF1
B7HN62
B7HNE0
B7HN98
B7HSI2
B7HZ01
B7HNC4
B7HUD6
B7HMM3
B7HWK0
B7HPZ3
B7I059
B7HTG3
B7HRJ9
B7HL28
B7HVF3
B7HPV3
B7HWF5
B7HS39
B7HQG6
B7HKB2
B7HYH8
B7HUV8
B7I0M7
B7HYS1
B7HZ42
B7HRM3
B7HKT9
B7HVZ2
B7HTE8
B7HPV0
B7HYW6
B7HUB8
B7HPP2
B7HKB8
B7HZN9
B7I0C7
B7HPN4
B7HRZ7
B7HUP9
B7HL31
B7HVL2
B7HNS0
B7HRT2
B7HQ85
B7HU53
B7HY83
B7HXP1
B7HQW6
B7HVS5
B7HL56
B7HQZ6
B7HMB4
B7I0D6
B7HMY3
B7HMM9
B7HUD8
B7HPN8
B7HZ54
B7HLH2
B7HVI2
B7HS47
B7HW99
B7HMA0
B7HW85
B7I0M0
B7HVJ8
B7HT61
B7HSK7
B7HLB8
B7HU38
B7HTM7
B7HW57
B7HVV1
B7HV56
B7HW15
B7HQ74
B7HWQ2
B7HV07
B7HQQ9
B7HM29
B7HSS5
B7HSG6
B7HS93
B7HKR1
B7HQY8
B7HUI5
B7HXL4
B7HTY1
B7HR62
B7HPY0
B7HV93
B7HMC3
B7HLP7
B7HP22
B7HVU4
B7HTI8
B7HXY8
B7HW21
B7HKY4
B7HUK9
B7HU18
B7HPR2
B7HP23
B7HSW4
B7HPV1
B7HPC3
B7HRJ6
B7HMP9
B7HKX8
B7HZH2
B7HXZ9
B7HTS4
B7HR02
B7HUR9
B7HWI5
B7HK58
B7HVU2
B7HLD6
B7HVE5
B7HKX5
B7HLU2
B7HVI6
B7HSC9
B7HTX8
B7HZB4
B7HT71
B7HR09
B7HPZ2
B7HN90
B7HP14
B7HXN0
B7HNJ0
B7HLY5
B7HQP8
B7HML4
B7HQZ7
B7I045
B7HWZ0
B7HNW5
B7HKB0
B7HMX9
B7HXF5
B7HRR9
B7HLR6
B7HYF0
B7HUJ4
B7I0D0
B7HV09
B7HU57
B7HK65
B7HWE8
B7HMT1
B7HND0
B7HMC6
B7HK91
B7HRB0
B7HSU8
B7HST3
B7HKY7
B7HR82
B7HXR2
B7HZC9
B7HL86
B7HPG1
B7HTD1
B7HT43
B7HUQ2
B7HVZ9
B7HT11
B7HU88
B7HPF3
B7HQY4
B7HUX6
B7HKC1
B7HZQ5
B7HSH6
B7HL40
B7HRU2
B7HQD1
B7HME3
B7HN38
B7HKE1
B7HTD0
B7HQQ0
B7HRX1
B7HQF2
B7HPJ0
B7HPH6
B7HL69
B7HQR0
B7HR12
B7HTX7
B7HUD7
B7HL34
B7HK54
B7HL45
B7HKF7
B7HRI1
B7HXQ9
B7HYA5
B7HPG9
B7HWW2
B7HS00
B7HXS2
B7HTC3
B7HX85
B7HT18
B7HNM7
B7HZF5
B7HMV3
B7HXS7
B7HVM4
B7HRV1
B7HQ83
B7HPY3
B7HSN0
B7HKF5
B7HU84
B7HT57
B7HR35
B7HPW4
B7HMN7
B7HLJ2
B7HNT2
B7HYT6
B7HQS9
B7HYF7
B7HVA8
B7HK82
B7HT37
B7HRU0
B7HYP0
B7HN61
B7HY16
B7HLZ9
B7HKY3
B7HQ57
B7HYF1
B7HZX4
B7HKE0
B7HKX7
B7HY62
B7HR86
B7HKE7
B7HZ40
B7HMM8
B7HUM8
B7HSG0
B7HTA7
B7HXM2
B7HW80
B7HRI8
B7HQ06
B7HRP2
B7HSI0
B7HUL0
B7HYX4
B7HLE3
B7HNC6
B7HPE6
B7HZ89
B7HZ63
B7HXA7
B7HZC1
B7HPM2
B7HNJ1
B7HUF4
B7HL75
B7HKH7
B7HQF9
B7HXL8
B7HYV4
B7HXB8
B7HZS4
B7HNH4
B7I046
B7HRF4
B7HR94
B7HUV2
B7HNI2
B7HQ26
B7HXN1
B7HMC7
B7I085
B7HL87
B7HLL0
B7HVC0
B7HVH2
B7HP03
B7HNZ4
B7HRF3
B7HR63
B7HL02
B7HRU5
B7HP90
B7HX52
B7HKC2
B7HQE3
B7HL29
B7I0C3
B7HKR5
B7I031
B7HP34
B7HPW9
B7HZY8
B7HXL6
B7HXZ5
B7I0L7
B7HQ79
B7HNA3
B7HTY8
B7HTZ6
B7HTC5
B7HRJ4
B7HLJ5
B7HZQ6
B7HZA6
B7HRZ9
B7HQJ2
B7HN28
B7HL33
B7HKI6
B7HL88
B7I0C9
B7HTK1
B7HQS0
B7HQP6
B7HNL3
B7HMF0
B7HX13
B7HPI1
B7HUJ6
B7HZG3
B7HSK2
B7HNQ3
B7HKW2
B7HNR8
B7HYL9
B7HWF1
B7HYU1
B7HZ27
B7HVL3
B7HRE2
B7HR36
B7I0N5
B7I0N3
B7I0Q3
B7I1I0
B7I1M2
B7I1K7
B7I1K9
B7I1I2
B7I1J0
B7I1L3
B7I1M9
B7I1J4
B7I1J3
B7I1N9
C2RZT0
C2RZU9
B7HK63
B7HK93
B7HKC6
B7HKC8
B7HKC9
B7HKD1
B7HKD2
B7HKD3
B7HKD4
B7HKD6
B7HKE5
B7HKI9
B7HKJ0
B7HKJ1
B7HKJ2
B7HKR9
B7HL15
B7HL23
B7HL30
B7HL47
B7HL53
B7HL54
B7HL55
B7HLA2
B7HLA3
B7HLA6
B7HLE4
B7HLF4
B7HLH0
B7HLH4
B7HLH5
B7HLI7
B7HLJ7
B7HLL9
B7HLM3
B7HM34
B7HM39
B7HM40
B7HMA5
B7HMA9
B7HME8
B7HMG6
B7HMM7
B7HMN9
B7HMV1
B7HN35
B7HNB7
B7HNI1
B7HNN4
B7HNQ7
B7HNU0
B7HNU3
B7HNW2
B7HPI4
B7HPI8
B7HPL1
B7HPL8
B7HPN3
B7HPN7
B7HPR7
B7HPS0
B7HPU1
B7HPU4
B7HPV6
B7HPX8
B7HQD8
B7HQG5
B7HQH7
B7HQH9
B7HQI0
B7HQL2
B7HQM4
B7HQM9
B7HQR7
B7HRG3
B7HRJ3
B7HRJ7
B7HRS7
B7HS01
B7HSI4
B7HSI6
B7HSM8
B7HSN5
B7HSR1
B7HSW3
B7HTE7
B7HTZ9
B7HU51
B7HU62
B7HUS8
B7HVK6
B7HVS1
B7HVU3
B7HVW2
B7HW45
B7HWR8
B7HWY9
B7HY90
B7HYF9
B7HYG6
B7HYU3
B7HYY0
B7HZ82
B7HZG8
B7HZJ8
B7HZR4
B7HZR5
B7I057
B7I0B1

## Sheet: Cluster description
Link between the cluster variable and the quantitative variables										Link between the cluster variable and the quantitative variables
================================================================										================================================================
Eta2 P-value										Eta2 P-value
Dim.1 0.91493148 0.000000e+00										Dim.1 0.80609729 0.000000e+00
Dim.2 0.56475228 0.000000e+00										Dim.2 0.25802275 7.316374e-140
Dim.4 0.15934204 1.619572e-95										Dim.3 0.10012212 6.547394e-50
Dim.3 0.15741285 3.145225e-94										Dim.4 0.04101809 2.974956e-20
Dim.5 0.03800071 3.347444e-20
										Description of each subcluster by quantitative variables
Description of each cluster by quantitative variables										=====================================================
=====================================================
Cluster 1 before subclustering
v.test Mean in category Overall mean sd in category Overall sd p.value
Dim.2 4.724130 0.06232642 -9.067353e-17 0.3350990 1.4568930 2.311023e-06											Cluster 1-1
Dim.3 4.647802 0.04131955 -5.684376e-17 0.3422088 0.9817146 3.354903e-06											v.test Mean in category Overall mean sd in category Overall sd p.value
Dim.5 -4.424488 -0.01922186 1.481480e-16 0.1655680 0.4797443 9.667131e-06											Dim.2 6.067356 0.1220323 8.414393e-16 0.8853273 1.883951 1.30033e-09
Dim.4 -7.947087 -0.04271026 1.151544e-16 0.1690359 0.5934739 1.909490e-15											Dim.1 -39.975682 -1.2606086 -1.639102e-15 1.0544132 2.953783 0.00000e+00
Dim.1 -35.049964 -1.18548197 6.576264e-17 0.5093361 3.7349495 3.904116e-269
											Cluster 1-2
Cluster 2											v.test Mean in category Overall mean sd in category Overall sd p.value
v.test Mean in category Overall mean sd in category Overall sd p.value											Dim.1 36.950356 4.9397446 -1.639102e-15 2.440223 2.953783 7.188315e-299
Dim.1 12.852811 2.50079235 6.576264e-17 1.5577434 3.7349495 8.294084e-38											Dim.3 -2.094728 -0.1470741 7.287388e-16 2.836720 1.551319 3.619516e-02
Dim.4 5.306539 0.16406190 1.151544e-16 0.7179029 0.5934739 1.117263e-07											Dim.2 -14.122202 -1.2041467 8.414393e-16 2.365416 1.883951 2.771910e-45
Dim.5 3.671566 0.09176054 1.481480e-16 0.6155164 0.4797443 2.410684e-04
Dim.3 -2.429931 -0.12427218 -5.684376e-17 1.1537168 0.9817146 1.510171e-02											Cluster 1-3
Dim.2 -3.935398 -0.29868337 -9.067353e-17 1.5601398 1.4568930 8.305908e-05											v.test Mean in category Overall mean sd in category Overall sd p.value
											Dim.2 28.664490 10.7400212 8.414393e-16 4.7493641 1.8839513 1.057766e-180
Cluster 3											Dim.1 14.370802 8.4421066 -1.639102e-15 3.0369502 2.9537829 7.891210e-47
v.test Mean in category Overall mean sd in category Overall sd p.value											Dim.3 13.884480 4.2837285 7.287388e-16 3.1112188 1.5513188 7.866923e-44
Dim.1 25.988829 9.6212431 6.576264e-17 2.827894 3.7349495 6.623522e-149											Dim.6 5.046692 0.6529099 -2.896310e-16 1.9124863 0.6505119 4.495258e-07
Dim.4 6.308596 0.3711026 1.151544e-16 1.272353 0.5934739 2.815789e-10											Dim.10 2.731843 0.1785999 -5.156240e-16 0.8777034 0.3287260 6.298105e-03
Dim.3 -5.310920 -0.5167908 -5.684376e-17 2.976474 0.9817146 1.090732e-07											Dim.9 2.349255 0.1585443 -4.498219e-17 0.8665645 0.3393354 1.881101e-02
Dim.2 -13.286701 -1.9186888 -9.067353e-17 1.694766 1.4568930 2.765039e-40											Dim.7 2.274359 0.1740000 -6.176140e-16 1.4203451 0.3846794 2.294442e-02
											Dim.18 -3.641815 -0.1437120 2.619283e-16 0.7093001 0.1984193 2.707226e-04
Cluster 4
v.test Mean in category Overall mean sd in category Overall sd p.value
Dim.2 33.618267 11.5066043 -9.067353e-17 5.352927 1.4568930 9.074215e-248
Dim.1 16.295281 14.2985106 6.576264e-17 5.282367 3.7349495 1.066121e-59
Dim.4 6.870092 0.9578740 1.151544e-16 3.614358 0.5934739 6.416037e-12
Dim.5 2.523397 0.2844066 1.481480e-16 3.188912 0.4797443 1.162270e-02
Cluster 5
v.test Mean in category Overall mean sd in category Overall sd p.value
Dim.1 26.848171 22.9255259 6.576264e-17 4.778897 3.7349495 8.859716e-159
Dim.5 5.154981 0.5654013 1.481480e-16 1.604953 0.4797443 2.536560e-07
Dim.3 -5.252218 -1.1788210 -5.684376e-17 3.865560 0.9817146 1.502786e-07
Dim.2 -11.060833 -3.6841334 -9.067353e-17 3.572813 1.4568930 1.942851e-28
Cluster 6
v.test Mean in category Overall mean sd in category Overall sd p.value
Dim.1 19.918620 52.595156 6.576264e-17 4.233382 3.7349495 2.806168e-88
Dim.3 18.636249 12.934377 -5.684376e-17 7.423207 0.9817146 1.632993e-77
Dim.2 6.497252 6.692049 -9.067353e-17 13.110917 1.4568930 8.180061e-11
Dim.5 -7.155156 -2.426781 1.481480e-16 4.161281 0.4797443 8.357780e-13
Dim.4 -17.174036 -7.205692 1.151544e-16 7.188892 0.5934739 4.154978e-66

## Sheet: PCA results
First PCA								Second PCA
