# Supplementary material for: Bacillus cereus Decreases NHE and CLO Exotoxin Synthesis to Maintain Appropriate Proteome Dynamics During Growth at Low Temperature
Source: Toxins (Basel). 2020 Oct 6;12(10):645. doi: 10.3390/toxins12100645 (PMC7601483; doi:10.3390/toxins12100645)
Supplement: Supplementary file 1 [file toxins-12-00645-s001.zip › Table S3.xlsx]

## Sheet: NASF sur
		Table S3: NASF values for proteins identified in the exoproteome of B. cereus AH187 at 30°C and 16°C.
		Growth at 30°C									Growth at 16°C
		Early Exponential growth			Late Exponential growth phase			Stationnary growth phase			Early Exponential growth			Late Exponential growth phase			Stationnary growth phase
Gene name	UNIPROT ID	30-EE1	30-EE2	30-EE3	30-LE1	30-LE2	30-L3	30-S1	30-S2	30-S3	16-EE1	16-EE2	16-EE3	16-LE1	16-LE2	16-LE3	16-S1	16-S2	16-S3
	A1BYI1	0	0	0	0	0	0	0	0.0107472	0.00805228	0	0	0	0	0	0.0130469	0.0165174	0	0.0261618
	A1BYI2	0	0	0	0	0	0	0	0.027631	0.0207023	0	0	0	0	0	0.0335433	0.021233	0	0
	A1BYI4	0	0	0	0	0	0	0	0	0	0	0	0	0	0	0.0160253	0.0202881	0	0
repX	A1BYM7	0	0	0	0	0	0	0	0	0	0	0	0	0	0	0	0.00701176	0	0
	A1BYM9	0	0	0	0	0	0	0	0	0	0	0	0	0	0	0	0.0145417	0	0
	A1BYQ6	0	0	0	0.0307013	0	0.024483	0.0476122	0.0536846	0.0402228	0	0	0	0	0	0	0.0183351	0	0
	A1BYQ7	0	0	0	0	0	0	0	0	0.0283021	0	0	0	0	0	0	0	0	0
	A1BYQ8	0	0	0	0.0293234	0.0308283	0.0467683	0.0303168	0.0170917	0.0256117	0	0	0	0	0	0	0	0	0
	A1BYS9	0	0	0	0	0	0	0	0	0	0	0	0	0	0	0	0.00949934	0	0
	A1BYU6	0	0	0	0	0	0	0.0195886	0.0220869	0	0	0	0	0	0	0	0	0	0
	A1BYW0	0	0	0	0	0	0.0977018	0.0633338	0.0714113	0.107009	0	0	0	0	0	0	0.054876	0.134902	0.173835
frmA	A1BYZ8	0	0	0	0	0	0	0	0	0	0	0	0	0	0	0	0.0128589	0	0
fghA	A1BYZ9	0	0	0	0	0	0	0	0	0	0	0	0	0	0	0	0.0107348	0	0
	B7HK64	0	0	0	0	0	0	0	0	0	0	0	0	0	0	0	0.0175627	0	0
queF	B7HK66	0	0	0	0	0	0	0	0	0	0	0	0	0	0	0.0414541	0.0787216	0.0860099	0.145467
	B7HK75	0	0	0	0	0	0	0	0	0	0	0	0	0	0	0	0.020441	0	0
	B7HK77	0	0	0	0	0	0	0	0	0	0	0	0	0	0	0	0.0230492	0	0
dltA	B7HK95	0	0	0	0	0	0	0	0	0	0	0	0	0	0	0.0286082	0.0633816	0.0890353	0.10756
	B7HKA8	0	0	0	0	0	0	0	0	0	0	0	0	0	0	0	0.0638371	0.0196164	0.0189583
hisB	B7HKD1	0	0	0	0	0	0	0.0137645	0	0	0	0	0	0	0	0	0	0.0781832	0.0755602
sat	B7HKE6	0	0	0	0	0	0	0	0	0	0	0	0	0	0	0.0570221	0.056148	0	0
	B7HKF7	0	0	0	0	0	0	0	0	0	0	0	0	0	0	0.039526	0.0417	0	0
	B7HKI1	0	0	0	0	0	0	0	0	0	0	0	0	0	0	0.0179143	0.0529189	0	0
hutH	B7HKJ1	0	0	0	0	0	0	0	0	0	0	0	0	0	0	0	0	0.00757349	0.0146388
	B7HKL0	0	0	0	0	0	0	0	0	0	0	0	0	0	0	0.00973396	0.0123232	0	0
	B7HKQ3	0	0	0	0	0	0	0	0	0	0	0	0	0	0	0	0.0373848	0	0
hfq	B7HKR8	0	0	0	0	0	0	0	0	0	0	0	0	0	0	0	0.0395105	0.291387	0.281611
pepT	B7HKU6	0	0	0	0.0124387	0.013077	0.00991928	0.00643003	0.0145002	0.0162963	0	0	0	0	0	0.0528088	0.09657	0.191745	0.202961
deoD	B7HKX2	0	0	0	0.0668365	0	0	0.0345504	0.0129857	0	0	0	0	0	0.090088	0.204936	0.133051	0.359789	0.426745
	B7HKX8	0	0	0	0	0	0	0.0142578	0.0241144	0.012045	0	0	0	0	0	0	0	0	0
resD	B7HKY5	0	0	0	0	0	0	0	0	0	0	0	0	0	0	0	0.0118347	0	0
	B7HL03	0	0	0	0	0	0	0	0	0	0	0	0	0	0	0	0.0141183	0	0
cmk	B7HL06	0	0	0	0	0	0	0	0	0	0	0	0	0	0	0.0160239	0.0202864	0	0
	B7HL18	0	0	0	0	0	0.0166648	0.0108027	0.0121805	0.0273784	0	0	0	0	0	0	0	0	0
folE	B7HL21	0	0	0	0	0	0	0	0	0.0118841	0	0	0	0.147436	0.220077	0.211809	0.15439	0.259685	0.270278
dapB	B7HL46	0	0	0	0.0195564	0.02056	0.0155954	0.0101095	0.0227976	0.017081	0	0	0	0	0	0.235244	0.175188	0.0574223	0.13874
	B7HL48	0	0	0	0	0	0	0	0	0	0	0	0	0	0	0	0.0130392	0.0320544	0.0464685
	B7HL63	0	0	0	0	0	0	0.00592065	0.00333789	0.00500177	0	0	0	0	0	0	0.00341999	0	0
	B7HL90	0	0	0	0	0	0	0	0	0	0	0	0	0	0	0.0128506	0.0271149	0	0
rny	B7HLB2	0	0	0	0	0	0.00777228	0	0.0113617	0	0	0	0	0	0	0	0.0145515	0	0
	B7HLB3	0	0	0	0	0	0	0	0	0	0	0	0	0	0	0.0253332	0.0534531	0	0
cinA	B7HLB5	0	0	0	0	0	0	0	0	0	0	0	0	0	0	0.0890029	0.0788746	0	0
dapG2	B7HLD3	0	0	0	0	0	0	0	0	0	0	0	0	0	0	0	0.00772201	0	0
pnp	B7HLE0	0	0	0	0	0	0	0.0453667	0.0127882	0.0766517	0	0	0	0.0396233	0	0.0879725	0.257688	0.0644214	0.0778251
infB	B7HLE6	0	0	0	0	0	0	0	0	0	0	0	0	0	0	0.0213794	0.0473663	0	0
nusA	B7HLE9	0	0	0	0	0	0	0	0	0	0	0	0	0	0	0.00983587	0.0249045	0	0
rimP	B7HLF0	0	0	0	0	0	0	0	0	0	0	0	0	0	0	0	0.038608	0	0
proS	B7HLF2	0	0	0	0	0	0	0	0	0	0	0	0	0	0	0	0.00541194	0	0
frr	B7HLF7	0	0	0	0.0831777	0.116595	0.0884408	0.0429978	0.0323212	0.0484328	0	0.275397	0	0	0	0.490464	0.389116	0	0
tsf	B7HLF9	0	0	0	0.0176204	0	0.028103	0.00910867	0	0.146205	0	0	0	0	0	0.910164	0.920765	0.0129344	0
rpsB	B7HLG0	0	0	0	0	0	0	0	0	0	0	0	0	0	0	0	0.0515309	0	0
codY	B7HLG1	0	0	0	0	0	0	0	0	0.00868155	0	0	0	0	0	0.182864	0.154338	0	0
hslV	B7HLG3	0	0	0	0	0	0	0	0	0	0	0	0	0	0	0	0.017577	0	0
trmFO	B7HLG5	0	0	0	0	0	0	0	0	0	0	0	0	0	0	0	0.0177953	0	0
sucC	B7HLG9	0	0	0	0	0	0	0	0	0	0	0	0	0	0	0	0.00820491	0	0
sipS2	B7HLH2	0	0	0	0	0	0	0	0	0.0237226	0	0	0	0	0	0	0	0	0
rplS	B7HLH3	0	0	0	0	0	0	0	0	0	0	0	0	0	0	0.0307401	0.0518894	0	0
rpsP	B7HLH7	0	0	0	0	0	0	0	0	0	0	0	0	0	0	0	0.0675268	0	0
acpP	B7HLI3	0	0	0	0	0	0	0.0347365	0	0.0293454	0	0	0	0	0	0.0475475	0.0601953	0.0986525	0.0953427
fabD	B7HLI5	0	0	0	0	0	0	0	0	0	0	0	0	0	0	0	0.025365	0	0
fmt	B7HLJ9	0	0	0	0	0	0	0	0	0	0	0	0	0	0	0.0932544	0.12298	0	0
gmk	B7HLK4	0	0	0	0	0	0	0	0	0	0	0	0	0	0	0	0.021642	0	0
pyrF	B7HLL7	0	0	0	0	0	0	0	0	0.00953485	0	0	0	0	0	0.0308981	0.117351	0	0
pyrD	B7HLL8	0	0	0	0	0	0	0	0	0	0	0	0	0	0	0.0245379	0.031065	0.0381838	0.0615045
pyrK	B7HLL9	0	0	0	0	0	0	0	0	0	0	0	0	0	0	0	0.0120123	0.0590599	0.0428089
carB	B7HLM0	0	0	0	0	0	0	0	0	0	0	0	0	0	0	0	0.0216014	0	0
pyrC	B7HLM2	0	0	0	0	0	0	0	0	0	0	0	0	0	0	0.0173716	0.0586468	0.0810968	0.0870845
ileS	B7HLM9	0	0	0	0	0	0	0	0	0.00477867	0	0	0	0	0	0	0.107826	0.0481944	0.112562
flgC	B7HLU5	0	0	0	0	0.0400544	0	0.0393899	0.0666205	0.0499149	0	0	0	0	0	0	0	0	0
	B7HLU6	0	0	0	0.0515898	0.108475	0.205703	0.133344	0.0902103	0.0450596	0	0	0	0	0	0	0	0	0
	B7HLV2	0	0	0	0	0	0	0.00693817	0	0.0117227	0	0	0	0	0	0	0	0	0
	B7HLV3	0	0	0	0.0273148	0.0861498	0.0217824	0.0423603	0.0636838	0.0596433	0	0	0	0	0	0	0.0081563	0	0
	B7HLW1	0	0	0	0	0	0	0.010243	0	0.0173065	0	0	0	0	0	0	0	0	0
	B7HLY2	0	0	0	0	0	0	0.0048166	0.0108618	0.00406907	0	0	0	0	0	0	0	0	0
	B7HLZ4	0	0	0	0	0	0	0.0184076	0.0207553	0	0	0	0	0	0	0	0	0.0653477	0.0505242
	B7HM20	0	0	0	0	0	0	0	0	0	0	0	0	0	0	0.0479464	0.026978	0	0
	B7HM21	0	0	0	0	0	0	0	0	0	0	0	0	0	0	0	0.028265	0	0
murD	B7HM33	0	0	0	0	0	0	0	0	0	0	0	0	0	0	0	0.0209884	0	0
murE	B7HM35	0	0	0	0	0	0	0	0	0	0	0	0	0	0	0	0.012713	0	0
ftsL	B7HM38	0	0	0	0.0420569	0.0884306	0.134154	0.0869635	0.0490274	0.0183667	0	0	0	0	0	0	0	0	0
	B7HM42	0	0	0	0	0	0	0	0	0	0	0	0	0	0	0	0.0190585	0	0
	B7HMC0	0	0	0	0	0	0	0	0	0	0	0	0	0	0	0	0.048462	0	0
	B7HMC3	0	0	0	0	0	0	0	0	0	0	0	0	0	0	0	0	0.239684	0.202687
ctaC	B7HMC8	0	0	0	0	0	0	0	0	0.0127604	0	0	0	0	0	0	0	0	0
	B7HMD4	0	0	0	0	0	0	0	0	0	0	0	0	0	0	0.0376855	0.111323	0	0
	B7HME3	0	0	0	0	0	0	0	0	0	0	0	0	0	0	0	0.0118196	0	0
	B7HME6	0	0	0	0	0	0	0	0	0	0	0	0	0	0	0	0.0632595	0	0
	B7HMF9	0	0	0	0	0	0	0	0	0	0	0	0	0	0	0	0.0064283	0.0316055	0
	B7HMJ0	0	0	0	0	0	0	0	0	0	0	0	0	0	0	0.0242889	0.0512498	0	0
cysK2	B7HML2	0	0	0	0	0	0	0	0	0	0	0	0	0	0	0	0.0156651	0	0
	B7HML3	0	0	0	0	0	0	0	0	0	0	0	0	0	0	0	0.0264456	0	0
msrA1	B7HMM2	0	0	0	0	0	0	0	0	0	0	0	0	0	0	0.0197228	0.0416153	0	0
mtaD	B7HMN9	0	0	0	0	0	0	0	0	0	0	0	0	0	0	0	0	0.0436001	0.0758472
	B7HMP7	0	0	0	0	0	0	0	0	0	0	0	0	0	0	0.0110232	0.0279107	0	0
panE1	B7HMP9	0	0	0	0	0	0	0	0	0	0	0	0	0	0	0.0114811	0.0145352	0.0119107	0.0575553
deoC	B7HMQ9	0	0	0	0	0	0	0.0126151	0.014224	0.0106573	0	0	0	0	0	0.0345353	0.0874436	0.19705	0.294315
	B7HMV1	0	0	0	0	0	0	0	0	0	0	0	0	0	0	0.0675583	0.0448009	0.0200245	0.029029
dapH	B7HMV2	0	0	0	0	0	0	0	0	0.0388757	0	0	0	0	0	0.393682	0.372141	0.0326728	0.0315766
	B7HMV8	0	0	0	0	0	0	0	0	0	0	0	0	0	0	0.133153	0.0749209	0	0
metE	B7HMX7	0	0	0	0.00654898	0.0619657	0.0417802	0.0440105	0.0267204	0.0486202	0	0.1301	0.0811159	0.141928	0.132409	0.0695098	0.166222	0.168257	0.185843
nagB	B7HN32	0	0	0	0.0394889	0.0415155	0.0314907	0.0204134	0.0345254	0.0603584	0	0	0	0	0	0.0977969	0.100228	0	0
scpB	B7HN35	0	0	0	0	0	0	0	0	0	0	0	0	0	0	0.0189735	0.0240205	0	0
	B7HN41	0	0	0	0	0	0.0289654	0.046941	0.0529278	0.0475869	0	0	0	0	0	0	0.010846	0	0
deoB	B7HN67	0	0	0	0	0	0	0	0	0	0	0	0	0	0	0.100949	0.201386	0.0571233	0.101213
	B7HNA7	0	0	0	0	0	0	0	0	0	0	0	0	0	0	0	0.0203629	0	0
	B7HNC3	0	0	0	0.022805	0.0239753	0.0363719	0.0589439	0.0531693	0.0298775	0	0	0	0	0	0	0.0136193	0	0
	B7HND3	0	0	0	0	0	0	0	0	0	0	0	0	0	0	0	0.0294937	0	0
nadE	B7HND7	0	0	0	0	0	0	0	0	0	0	0	0	0	0	0.0673924	0.0625673	0.0559309	0.0270272
	B7HNH4	0	0	0	0	0	0	0	0	0	0	0	0	0	0	0.0362234	0.0305727	0	0
namA	B7HNI1	0	0	0	0	0	0	0	0	0	0	0	0	0	0	0	0.022128	0.0543974	0.0736014
	B7HNL4	0	0	0	0	0	0	0	0	0	0	0	0	0	0	0.0128366	0.0162512	0	0
ribD	B7HNM6	0	0	0	0	0	0	0	0	0	0	0	0	0	0	0.00998017	0.0168466	0	0.0100062
ribBA	B7HNM8	0	0	0	0	0	0	0	0	0	0	0	0	0	0	0	0.00777108	0	0
ribH	B7HNM9	0	0	0	0	0	0.0280284	0	0.0204862	0.0460475	0	0	0	0	0	0.472526	0.251882	0.748206	0.797908
bioB	B7HNN1	0	0	0	0	0	0	0	0	0	0	0	0	0	0	0.0219069	0.0600908	0	0
	B7HNN3	0	0	0	0	0	0	0	0	0	0	0	0	0	0	0.0287801	0.0242905	0	0
	B7HNN7	0	0	0	0.154951	0.162903	0.154458	0.1602	0.180632	0.0845859	0	0	0	0	0	0	0	0	0
sdaAA2	B7HNQ4	0	0	0	0	0	0	0	0	0	0	0	0	0	0	0	0.0228281	0	0
bfmbB	B7HNS3	0	0	0	0	0	0	0	0	0	0	0	0	0	0	0	0.0216485	0	0
buk	B7HNS7	0	0	0	0	0	0	0	0	0	0	0	0	0	0	0.0202324	0.0341524	0	0
argR	B7HNT8	0	0	0	0	0	0	0	0	0	0	0	0	0	0	0	0.0302711	0	0
folD	B7HNU4	0	0	0	0.0183784	0	0.014656	0.0190011	0.0107122	0.0160521	0	0	0	0	0	0.156053	0.126221	0	0
nusB	B7HNU5	0	0	0	0	0	0	0	0	0	0	0	0	0	0	0.0267473	0.0790119	0	0
	B7HNU6	0	0	0	0	0	0	0	0	0.0177478	0	0	0	0	0	0.115025	0.109217	0	0
efp	B7HNW0	0	0	0	0	0	0	0	0	0	0	0	0	0	0	0.0978713	0.0578225	0	0
aroQ	B7HNW2	0	0	0	0	0	0	0	0	0	0	0	0	0	0	0.0499862	0.0105471	0.0259281	0.0250582
mntR	B7HNW6	0	0	0	0	0	0	0	0	0	0	0	0	0	0	0.0975541	0.0926279	0	0
gcvPB	B7HNY9	0	0	0	0.0104148	0.0109492	0	0.0753732	0.0242818	0.0636753	0	0	0	0.282133	0.0842275	0.324253	0.435384	0.305803	0.369429
gcvPA	B7HNZ0	0	0	0	0.0115775	0.0243433	0.0369302	0.0598487	0.040489	0.0606723	0	0	0	0.125452	0.0936309	0.27034	0.304224	0.237961	0.312112
gcvT	B7HNZ1	0	0	0	0.0142174	0	0.0226755	0.0440971	0.00828687	0.0931332	0	0	0	0	0	0.513063	0.382082	0.0104364	0.0100863
dal2	B7HP06	0	0	0	0	0	0	0	0	0	0	0	0	0	0	0	0.0118018	0	0.00934636
fhs	B7HP29	0	0	0	0	0	0.00754265	0.0537835	0.022052	0.049567	0	0	0	0.20498	0.229479	0.20078	0.189229	0.444354	0.456287
	B7HP35	0	0	0	0.135009	0.141938	0.322992	0.209375	0.157385	0.2948	0	0	0	0	0	0	0	0	0
	B7HP68	0	0	0	0	0	0	0	0	0	0	0	0	0	0	0	0.00387009	0	0
bsaA	B7HP99	0	0	0	0	0	0	0	0	0	0	0	0	0	0	0	0.0287482	0	0
metI	B7HPF6	0	0	0	0	0	0	0	0	0	0	0	0	0	0	0	0.016745	0	0
glcK	B7HPG3	0	0	0	0	0	0	0	0	0	0	0	0	0	0	0.0352308	0.0148674	0	0
nfo	B7HPI4	0	0	0	0	0	0	0	0	0	0	0	0	0	0	0.0245954	0.0518965	0	0
ybeY	B7HPK2	0	0	0	0	0	0	0	0	0	0	0	0	0	0	0	0.0378259	0	0
	B7HPK7	0	0	0	0	0	0	0	0	0	0	0	0	0	0	0.049155	0.0622305	0	0
dnaK	B7HPL3	0	0	0	0	0.0182724	0.00693007	0.00898464	0.0101305	0.0379512	0	0	0	0	0	0.13528	0.339936	0.216891	0.221945
grpE	B7HPL4	0	0	0	0	0.0270815	0.0205421	0.0399483	0	0.0112494	0	0	0	0	0	0.0182271	0.0538432	0	0
	B7HPN2	0	0	0	0	0	0	0	0	0	0	0	0	0	0	0.0731788	0.0617631	0	0
	B7HPP7	0	0	0	0	0	0	0	0	0.0224099	0	0	0	0	0	0	0	0	0
	B7HPP8	0	0	0	0	0	0	0	0	0	0	0	0	0	0	0.0224513	0.00947449	0	0
dnaN1	B7HPR8	0	0	0	0	0	0	0	0	0	0	0	0	0	0	0	0.00803502	0	0
pdxS	B7HPS6	0	0	0	0	0	0.0286987	0	0	0.0550069	0	0	0	0	0	0.547489	0.44059	0.634014	0.880818
pdxT	B7HPS7	0	0	0	0	0	0	0	0	0	0	0	0	0	0	0.037803	0.0638117	0	0
serS	B7HPS8	0	0	0	0	0	0	0	0	0	0	0	0	0	0	0.0249177	0.0806172	0	0
	B7HPT5	0	0	0	0	0	0	0	0	0	0	0	0	0	0	0	0.187187	0	0
recR	B7HPT6	0	0	0	0	0	0	0	0	0	0	0	0	0	0	0	0.0310892	0	0
	B7HPU3	0	0	0	0	0	0	0	0	0	0	0	0	0	0	0	0.0108617	0	0
	B7HPV8	0	0	0	0	0	0	0	0	0	0	0	0	0	0	0	0.0383223	0	0.0606983
spoVG	B7HPV9	0	0	0	0	0	0	0.0540854	0.0304917	0.0685371	0	0	0	0	0	0.370162	0.390522	0.038401	0.0371127
glmU	B7HPW0	0	0	0	0	0	0	0	0	0	0	0	0	0	0	0	0.00690772	0.00849067	0.0246174
mfd	B7HPW4	0	0	0	0.00426384	0	0.00340023	0.00220415	0.0074558	0.00372414	0	0	0	0	0	0	0	0	0
	B7HPW8	0	0	0	0	0	0	0	0	0	0	0	0	0	0	0	0.0330915	0	0
	B7HPX2	0	0	0	0	0	0	0	0	0	0	0	0	0	0	0	0.019103	0	0
hslO	B7HPX8	0	0	0	0	0	0	0	0	0	0	0	0	0	0	0.0252509	0.0213118	0	0
lysS	B7HPY8	0	0	0	0	0	0	0	0	0	0	0	0	0	0	0	0.0177631	0	0
argS	B7HQ02	0	0	0	0	0	0	0	0	0	0	0	0	0	0	0	0.00529469	0	0
	B7HQA3	0	0	0	0	0	0	0	0	0	0	0	0	0	0	0	0.0420651	0.0344697	0.0333133
cysM	B7HQD1	0	0	0	0	0	0	0	0	0	0	0	0	0	0	0.0122381	0.0154935	0	0
greA	B7HQD7	0	0	0	0.065602	0.103453	0.0784721	0.0678246	0.114712	0.100272	0	0	0	0	0	0.232097	0.381986	0.0481559	0
	B7HQE4	0	0	0	0	0	0	0	0	0	0	0	0	0	0	0	0.0222333	0	0
	B7HQF3	0	0	0	0	0	0	0	0	0	0	0	0	0	0	0.0163478	0.0344939	0	0
	B7HQF5	0	0	0	0	0	0	0	0	0	0	0	0	0	0	0.00958983	0.00809384	0	0
	B7HQF6	0	0	0	0	0	0	0	0	0	0	0	0	0	0	0.0259942	0.0329087	0	0
aspS	B7HQG0	0	0	0	0	0	0	0	0	0	0	0	0	0	0	0	0.00514973	0	0
dtd	B7HQG5	0	0	0	0	0	0	0	0	0	0	0	0	0	0	0.0247681	0.0313566	0	0
apt	B7HQG7	0	0	0	0	0	0	0	0	0	0	0	0	0	0	0	0.0274846	0	0
recJ	B7HQG8	0	0	0	0	0	0	0	0	0	0	0	0	0	0	0	0.00387578	0	0
pheA	B7HQJ2	0	0	0	0	0	0	0	0	0	0	0	0	0	0	0	0.032458	0	0
rplU	B7HQK2	0	0	0	0	0	0	0	0	0	0	0	0	0	0	0.0719027	0.030343	0	0
mreB	B7HQL0	0	0	0	0	0	0	0	0	0	0	0	0	0	0	0	0.0142154	0	0
maf	B7HQL2	0	0	0	0	0	0	0	0	0	0	0	0	0	0	0.038339	0	0	0
hemL2	B7HQM1	0	0	0	0	0	0	0	0	0	0	0	0	0	0	0.0439905	0.0631178	0	0
hemB	B7HQM2	0	0	0	0	0	0	0	0	0	0	0	0	0	0	0	0.0282159	0	0
clpX	B7HQN2	0	0	0	0	0	0	0	0	0	0	0	0	0	0	0	0.0110913	0	0
tig	B7HQN3	0	0	0	0.0121151	0.0127369	0.0193225	0.0187883	0.00706153	0.0846528	0	0	0	0	0	0.274321	0.408791	0.0177865	0
	B7HQN8	0	0	0	0	0	0	0	0	0	0	0	0	0	0	0	0	0.0177915	0.0343892
rph	B7HQP4	0	0	0	0.0211849	0	0.0168941	0.0109513	0	0.0277551	0	0	0	0	0	0.0449708	0.0506072	0.0466531	0.0450879
ispF	B7HQS1	0	0	0	0	0	0	0	0	0	0	0	0	0	0	0.0705189	0.0495984	0.121928	0.117838
cysS	B7HQS4	0	0	0	0	0	0	0	0	0	0	0	0	0	0	0	0.0253157	0	0
rplK	B7HQT1	0	0	0	0.0763936	0.0401571	0.0609205	0.0789817	0.089055	0.0500429	0	0	0	0	0	0.216221	0.330765	0.0280388	0.0270981
rplA	B7HQT2	0	0	0	0	0	0	0.0120784	0	0.0204076	0	0	0	0	0	0.132263	0.167446	0	0
rplJ	B7HQT3	0	0	0	0	0	0.0758698	0.0327876	0.0184847	0.0969466	0	0	0	0	0	0.13464	0.0852272	0	0
rplL	B7HQT4	0	0	0	0.274179	0.528459	0.36441	0.259846	0.266351	0.199562	0	0.453896	0	0	0	0.452681	0.695903	0.0670881	0.0324186
rpoB	B7HQT6	0	0	0	0	0	0	0	0	0	0	0	0	0	0	0.00306875	0.0505056	0.00318355	0.0153837
rpsG	B7HQU0	0	0	0	0	0	0	0	0	0	0	0	0	0	0	0.294221	0.21967	0	0
fusA	B7HQU1	0	0	0.116757	0	0	0.011946	0.00387191	0.00873147	0.0785039	0	0	0	0	0	0.264995	0.360087	0.0109963	0.00531371
tuf	B7HQU2	0.245524	0	1.24637	0.0266518	0.0560391	0.0318804	0.0137773	0.0155345	0.0349173	0.212828	0.264728	0.33011	0.0721988	0.0538853	0.443175	0.342208	0.029346	0.0189077
rpsJ	B7HQU3	0	0	0	0	0	0.0390419	0.0253083	0	0.042761	0	0	0	0	0	0.0346422	0.0438572	0	0
rplC	B7HQU4	0	0	0	0	0	0	0	0	0	0	0	0	0	0	0.0535089	0.112904	0	0
rplD	B7HQU5	0	0	0	0	0	0	0	0	0	0	0	0	0	0	0	0.0454864	0	0
rplW	B7HQU6	0	0	0	0	0	0	0	0	0	0	0	0	0	0	0	0.0307369	0	0
rplB	B7HQU7	0	0	0	0	0	0	0	0	0	0	0	0	0	0	0.0133787	0.0621039	0	0
rpsS	B7HQU8	0	0	0	0	0	0	0	0	0.023506	0	0	0	0	0	0.0761722	0.160724	0	0
rplV	B7HQU9	0	0	0	0	0	0	0.023588	0	0.0398544	0	0	0	0	0	0.12915	0.163504	0	0
rpmC	B7HQV2	0	0	0	0	0.0774142	0.0587208	0.0761298	0.0429197	0.0643146	0	0	0	0	0	0.364724	0.241865	0	0
rplN	B7HQV4	0	0	0	0	0	0	0.0225369	0	0.0190392	0	0	0	0	0	0.185092	0.130182	0	0
rplX	B7HQV5	0	0	0	0	0	0	0	0	0	0	0	0	0	0	0.0360469	0.182542	0	0
rplE	B7HQV6	0	0	0	0	0	0.0226342	0	0.0330871	0.0123951	0.453304	0.281923	0	0	0	0.0602504	0.0423763	0	0
rpsH	B7HQV8	0	0	0	0	0	0	0	0	0.151066	0	0	0	0	0	0.489537	0.344308	0	0.0272674
rplR	B7HQW0	0	0	0	0	0	0	0	0	0	0	0	0	0	0	0	0.0260645	0	0
rpmD	B7HQW2	0	0	0	0.261757	0.0917303	0.20874	0.180417	0.15257	0.266729	0	0	0	0	0	0.555651	0.521078	0	0
rplO	B7HQW3	0	0	0	0	0	0	0	0	0	0	0	0	0	0	0	0.044101	0	0
adk	B7HQW5	0	0	0	0.0240654	0.0253004	0.0191911	0	0	0.0315288	0	0	0	0	0	0.170284	0.273068	0	0
maP1	B7HQW6	0	0	0	0	0	0	0	0	0	0	0	0	0	0	0	0.0392674	0	0
infA	B7HQW7	0	0	0	0	0	0	0	0	0.0305178	0	0	0	0	0	0.0494472	0.187801	0	0
rpsM	B7HQW9	0	0	0	0	0	0	0	0	0	0	0	0	0	0	0.293183	0.25982	0.0608302	0.117579
rpsK	B7HQX0	0	0	0	0	0	0	0	0	0	0	0	0	0	0	0.11784	0.124321	0	0
rplM	B7HQX7	0	0	0	0	0	0	0	0	0	0	0	0	0	0	0	0.0207944	0	0
rpsI	B7HQX8	0	0	0	0	0	0	0	0	0	0	0	0	0	0	0.0558622	0.11787	0	0
glmM	B7HQZ0	0	0	0	0.0236285	0.0372618	0.0659496	0.103823	0.0550894	0.149623	0	0	0	0	0	0.543378	0.567974	0.0520344	0.0251443
	B7HQZ7	0	0	0	0	0	0	0	0	0	0	0	0	0	0	0	0.00689478	0.0112997	0.0163809
	B7HQZ8	0	0	0	0	0	0	0	0	0	0	0	0	0	0	0	0.0315835	0	0
	B7HR23	0	0	0	0	0	0.0098842	0.00640729	0.00361224	0.0135322	0	0	0	0	0	0	0	0	0
	B7HR52	0	0	0	0	0	0	0	0	0	0	0	0	0	0	0	0.016465	0	0
cspA2	B7HR96	0	0	0	0	0	0	0.0807335	0.0455151	0	0	0	0	0	0	0.110509	0.186539	0	0
	B7HRB1	0	0	0	0	0	0	0	0	0	0	0	0	0	0	0.0522884	0.0220658	0.144652	0.104849
	B7HRD2	0	0	0	0	0	0	0	0	0	0	0	0	0	0	0	0	0.0210518	0.0203455
	B7HRF8	0	0	0	0	0	0	0	0	0	0	0	0	0	0	0	0	0.121868	0.141335
sdhA	B7HRG0	0	0	0	0	0	0	0	0	0	0	0	0	0	0	0	0.00517304	0	0
isdG	B7HRI4	0	0	0	0	0	0	0	0	0	0	0	0	0	0	0	0.0711472	0	0
pheS	B7HRK2	0	0	0	0	0	0	0	0	0	0	0	0	0	0	0	0.00876482	0	0
	B7HRL1	0	0	0	0	0	0	0	0	0	0	0	0	0	0	0	0.0266064	0	0
rpmI	B7HRL3	0	0	0	0	0	0	0	0	0	0	0	0	0	0	0	0.0455725	0	0
infC	B7HRL4	0	0	0	0	0	0	0	0	0	0	0	0	0	0	0	0.0180278	0	0
phoP	B7HRM8	0	0	0	0	0	0	0	0	0	0	0	0	0	0	0	0.0123499	0	0
mdh	B7HRN2	0	0	0	0	0	0	0	0	0	0	0	0	0	0	0.0966629	0.0764847	0	0
pfkA	B7HRN9	0	0	0	0.0333452	0.0350565	0.0664784	0.0775686	0.0485898	0.06553	0	0	0	0	0.0674184	0.49549	0.338538	0.465071	0.484953
	B7HRQ4	0	0	0	0	0	0	0	0	0	0	0	0	0	0	0	0.00687035	0.0337789	0.0163228
	B7HRX6	0	0	0	0	0	0	0	0	0	0	0	0	0	0	0	0.0265286	0	0
	B7HRY1	0	0	0	0	0	0	0	0	0	0	0	0	0	0	0	0	0.0186198	0.0449879
ddl	B7HRY4	0	0	0	0	0	0	0	0	0	0	0	0	0	0	0	0.0170249	0	0
dal1	B7HRZ1	0	0	0	0	0	0	0	0	0	0	0	0	0	0	0	0	0.00961968	0.0185939
	B7HRZ4	0	0	0	0	0	0	0	0	0	0	0	0	0	0	0	0.0062173	0	0
groS	B7HS04	0	0	0	0.11361	0.11944	0.181197	0.0880939	0.132439	0.0496146	0	0	0	0.307765	0	0.723501	0.407091	0.166793	0.0805985
groL	B7HS05	0	0	0	0.0896818	0.146665	0.111249	0.0721157	0.0871214	0.178419	0	0	0	0	0	0.39485	0.511783	0.0585173	0.106039
purC	B7HS29	0	0	0	0	0	0	0	0	0	0	0	0	0	0	0	0.0125424	0	0
purQ	B7HS31	0	0	0	0	0	0	0	0	0	0	0	0	0	0	0.0159285	0.0268874	0	0
purL	B7HS32	0	0	0	0	0	0	0	0	0	0	0	0	0	0	0	0.0447131	0	0
purF	B7HS33	0	0	0	0	0	0	0	0	0	0	0	0	0	0	0.00788487	0.00665485	0	0
purH	B7HS36	0	0	0	0.0720122	0.0540771	0.0492228	0.0744519	0.0299812	0.0449265	0	0.102184	0	0.0557368	0.083198	0.160145	0.132091	0.128378	0.16786
gpmA	B7HS46	0	0	0	0	0	0	0	0	0	0	0	0	0	0	0.200162	0.168937	0	0.0143346
bla1	B7HS58	0	0	0	0	0	0	0	0	0	0	0	0	0	0	0	0	0	0.0266067
	B7HS87	0	0	0	0	0	0	0.00301537	0.00339995	0.00254739	0	0	0	0	0	0	0	0	0
tenA	B7HSD0	0	0	0	0	0	0	0	0	0	0	0	0	0	0	0	0.0319011	0	0
cypA	B7HSF8	0	0	0	0	0	0	0	0	0	0	0	0	0	0	0	0	0	0.0171969
nadK	B7HSH9	0	0	0	0	0	0	0	0	0	0	0	0	0	0	0.0133296	0.0506262	0	0
	B7HSI0	0	0	0	0	0	0	0.00497455	0	0	0	0	0	0	0	0.00680919	0.00574698	0.00706393	0.0273078
rpsD	B7HSJ2	0	0	0	0	0	0	0	0	0	0	0	0	0	0	0.0528636	0.0817979	0	0
	B7HSK7	0	0	0	0	0	0	0	0	0	0	0	0	0	0	0	0.00970867	0.0119335	0.0345993
murC	B7HSM3	0	0	0	0.0116193	0	0.00926587	0.00600647	0	0	0	0	0	0	0	0.00822169	0.00346956	0	0
	B7HSM8	0	0	0	0	0	0	0	0	0	0	0	0	0	0	0.0130315	0.0274965	0	0
	B7HSM9	0	0	0	0	0	0	0.0236808	0	0	0	0	0	0	0	0.129658	0.0820736	0.100881	0.194993
	B7HSQ3	0	0	0	0	0	0	0	0	0	0	0	0	0	0	0.0214127	0.0451809	0	0
moeA3	B7HSR0	0	0	0	0	0	0	0	0	0	0	0	0	0	0	0	0.0146752	0	0
leuS	B7HSS7	0	0	0	0	0	0	0	0	0.00820293	0	0	0	0	0	0	0.0430009	0	0
metK	B7HSV6	0	0	0	0	0	0	0	0	0.00577215	0	0	0	0	0	0.187049	0.138136	0.0679163	0.0750146
pckA	B7HSV7	0	0	0	0	0	0	0.00510483	0	0.0129377	0	0	0	0	0	0.342388	0.474747	0.0507425	0.0350286
ligA	B7HSW5	0	0	0	0	0	0	0	0	0	0	0	0	0	0	0	0.0181705	0	0
rocA	B7HSW8	0	0	0	0.0712154	0.0748702	0.137921	0.215625	0.237196	0.195489	0	0.404212	0.252022	1.15752	1.02847	0.878248	0.820229	1.71766	1.60229
gatA	B7HSY0	0	0	0	0	0	0	0	0	0	0	0	0	0	0	0	0.00653008	0	0
gatB	B7HSY1	0	0	0	0	0	0	0.00555611	0	0.00469381	0	0	0	0	0	0.0152105	0.0513507	0	0
	B7HT18	0	0	0	0	0	0	0	0	0	0	0	0	0	0	0	0.0166995	0	0
amhX	B7HT21	0	0	0	0	0	0	0	0	0	0	0	0	0	0	0	0.00827771	0	0
	B7HT33	0	0	0	0	0	0	0	0	0	0	0	0	0	0	0	0.0220842	0	0
	B7HT62	0	0	0	0	0	0	0	0	0	0	0	0	0	0	0	0	0	0
thiM	B7HT69	0	0	0	0	0	0	0	0	0.00889157	0	0	0	0	0	0.403389	0.249266	0.0149457	0.0144443
thiE	B7HT70	0	0	0	0	0	0	0	0	0	0	0	0	0	0	0.205954	0.267982	0	0
	B7HT71	0	0	0	0	0	0	0	0	0	0	0	0	0	0	0.0111973	0.0236264	0	0
	B7HT74	0	0	0	0	0	0	0	0	0	0	0	0	0	0	0	0.0578093	0	0
proS1	B7HT92	0	0	0	0	0	0	0	0	0	0	0	0	0	0	0	0.00936897	0	0
	B7HTE5	0	0	0	0	0	0	0	0	0	0	0	0	0	0	0	0.0485578	0.0298426	0.0576827
kynU	B7HTI9	0	0	0	0	0	0	0	0	0	0	0	0	0	0	0	0.00351665	0.01729	0.00835498
	B7HTM6	0	0	0	0	0	0	0.0118273	0	0.00499584	0	0	0	0	0	0	0	0	0
	B7HTN6	0	0	0	0	0	0	0	0	0	0	0	0	0	0	0	0	0.0278431	0.0403634
mutTA	B7HTP9	0	0	0	0	0	0	0	0	0	0	0	0	0	0	0	0.0276308	0	0
luxS	B7HTQ2	0	0	0	0	0	0	0	0	0.0139905	0	0	0	0	0	0.0226684	0.0765286	0.0235164	0.0227274
	B7HTQ4	0	0	0	0	0	0	0	0	0	0	0	0	0	0	0	0.0325887	0	0
	B7HTS9	0	0	0	0	0	0	0	0	0	0	0	0	0	0	0.012327	0.010404	0	0
cspD	B7HTX1	0	0	0	0	0	0	0.0408472	0	0	0	0	0	0	0	0.167736	0.0943797	0	0
	B7HTY0	0	0	0	0	0	0	0.0130917	0.0295228	0.0331797	0	0	0	0	0	0	0	0	0
pgi	B7HTY6	0	0	0	0.0908765	0.0955403	0.0815288	0.140933	0.0860748	0.148825	0	0	0	0.369272	0.229671	0.401895	0.362945	0.516994	0.515767
sipS1	B7HU08	0	0	0	0	0	0	0.0292471	0.0164886	0.012354	0	0	0	0	0	0	0	0	0
pfl	B7HU44	0	0	0	0	0	0	0	0	0	0	0	0	0	0	0	0.00404155	0	0
hemL1	B7HU66	0	0	0	0	0	0	0	0	0	0	0	0	0	0	0.0348254	0.0771559	0	0
bcP	B7HU71	0	0	0	0	0	0	0	0	0	0	0	0	0	0	0	0.0391487	0	0
	B7HU72	0	0	0	0	0	0	0	0	0	0	0	0	0	0	0.0251145	0.0423933	0	0
	B7HU74	0	0	0	0	0	0	0.011219	0	0.0189557	0	0	0	0	0	0.0307134	0.0518443	0	0
	B7HU83	0	0	0	0	0	0	0	0	0.0102398	0	0	0	0	0	0	0	0	0
	B7HUA0	0	0	0	0.0310162	0.16304	0.0742023	0.0481005	0.0180784	0.0677256	0	0	0	0	0	0	0	0	0
ppaC	B7HUD5	0	0	0	0	0	0	0	0	0.00739884	0	0	0	0	0	0.203798	0.121416	0.0124366	0
divIC2	B7HUG0	0	0	0	0	0	0	0.0633204	0.0475975	0.0178311	0	0	0	0	0	0	0	0	0
	B7HUG1	0	0	0	0	0	0	0	0	0	0	0	0	0	0	0	0	0.0767484	0.0556301
	B7HUI5	0	0	0	0	0	0	0	0	0	0	0	0	0	0	0	0.0168604	0	0
	B7HUJ7	0	0	0	0	0	0	0	0	0	0	0	0	0	0	0	0.0223117	0	0
	B7HUK9	0	0	0	0	0	0	0	0	0	0	0	0	0	0	0	0.0339138	0.0277903	0.107432
glyS	B7HUQ7	0	0	0	0	0	0	0	0	0	0	0	0	0	0	0	0.0128867	0	0
	B7HUQ8	0	0	0	0	0	0	0	0	0	0	0	0	0	0	0	0.0244921	0	0
gtaB	B7HUR2	0	0	0	0	0	0	0	0	0	0	0	0	0	0	0	0.0253536	0	0
pepA	B7HUR5	0	0	0	0	0	0	0	0	0	0	0.10599	0	0.289065	0	0.279367	0.264463	0.227155	0.363366
	B7HUS7	0	0	0	0	0	0	0	0	0	0	0	0	0	0	0.0323647	0.0409739	0	0
dapF	B7HUS8	0	0	0	0	0	0	0	0	0	0	0	0	0	0	0	0.0162191	0	0
	B7HUU2	0	0	0	0	0	0	0	0	0	0	0	0	0	0	0	0.0289153	0	0
	B7HUU3	0	0	0	0	0	0	0	0	0	0	0	0	0	0	0.0940746	0.178648	0.048797	0
fbp1	B7HUV3	0	0	0	0	0	0	0	0	0	0	0	0	0	0	0	0.0148001	0	0
gcvH	B7HUY1	0	0	0	0.0408065	0.0429008	0.0325414	0.0632835	0.0237849	0.0356413	0	0	0	0	0	0.288743	0.21933	0.0299545	0.0578991
	B7HV01	0	0	0	0	0	0	0	0	0	0	0	0	0	0	0	0.00781021	0	0
	B7HV37	0	0	0	0	0	0	0.0205697	0	0.0115849	0	0	0	0	0	0	0	0	0
	B7HV41	0	0	0	0	0	0.0331178	0	0	0.0362725	0	0	0	0	0	0	0	0	0
	B7HV45	0	0	0	0.0877255	0.138341	0.139915	0.0906975	0.127831	0.0957767	0	0	0	0	0	0	0.0261952	0	0
	B7HV47	0	0	0	0	0	0	0	0	0.0115269	0	0	0	0	0	0	0	0	0
	B7HV50	0	0	0	0	0	0	0.00503073	0	0.00566662	0	0	0	0	0	0	0	0	0
	B7HV70	0	0	0	0	0	0	0.03063	0.0172683	0.0129381	0	0	0	0	0	0	0	0	0
	B7HV83	0	0	0	0	0	0	0.015064	0.067941	0	0	0	0	0	0	0	0	0	0
	B7HVB7	0	0	0	0	0	0	0	0	0	0	0	0	0	0	0	0.0305122	0	0
	B7HVC0	0	0	0	0.0157481	0.0165563	0.0125584	0.0081408	0.0183581	0.00687735	0	0	0	0	0	0.0111432	0.00940486	0	0.0111722
treC	B7HVD8	0	0	0	0	0	0	0	0	0	0	0	0	0	0	0	0	0.0128162	0.0247725
	B7HVH4	0	0	0	0	0	0	0	0	0	0	0	0	0	0	0	0.010356	0	0
aroA	B7HVH9	0	0	0	0	0	0	0	0	0	0	0	0	0	0	0.0982855	0.135742	0.241002	0.26875
proA	B7HVK6	0	0	0	0	0	0	0	0	0.00547585	0	0	0	0	0	0.0975959	0.0823712	0.0460214	0.0622683
	B7HVT6	0	0	0	0	0	0	0.0136736	0.00770877	0.0173272	0	0	0	0	0	0	0	0	0
pcp	B7HVU3	0	0	0	0	0	0	0	0	0	0	0	0	0	0	0.017214	0.00726432	0.0892898	0.0862942
cutC	B7HVV1	0	0	0	0	0	0	0	0	0	0	0	0	0	0	0	0.0138234	0	0
	B7HVY1	0	0	0	0	0	0	0	0	0	0	0	0	0	0	0.0617286	0.0434159	0	0
	B7HVZ3	0	0	0	0	0	0	0	0	0	0	0	0	0	0	0	0.0214692	0	0.0127518
	B7HVZ6	0	0	0	0	0	0.0281635	0	0	0.0308464	0	0	0	0	0	0	0.0210914	0	0
tyrS	B7HVZ8	0	0	0	0	0	0	0	0	0	0	0	0	0	0	0	0.0108219	0	0
murB	B7HVZ9	0	0	0	0	0	0	0	0	0	0	0	0	0	0	0	0.0203574	0	0
	B7HW02	0	0	0	0	0	0	0	0	0	0	0	0	0	0	0.0532006	0.0561269	0	0
vacB	B7HW46	0	0	0	0	0	0	0	0	0	0	0	0	0	0	0	0.00557585	0	0
eno	B7HW52	0	0	0.192168	0.554746	0.414731	0.49154	0.45246	0.395199	0.382238	0.787543	1.10204	1.22153	2.73842	1.24622	1.34333	1.64913	2.43426	2.05524
tpiA	B7HW54	0	0	0	0.281565	0.227704	0.276352	0.268711	0.201988	0.227008	0	0.215134	0	1.76019	1.57646	1.42528	1.20294	2.55972	2.36629
pgk	B7HW55	0	0	0	0.040515	0.0425942	0.0323089	0.0977377	0.0551015	0.141547	0	0	0	0.0731692	0.109219	0.726256	0.669419	0.19827	0.153294
rbsB	B7HW92	0	0	0	0.0175921	0	0.0140289	0.0363761	0.0102539	0.0384132	0	0	0	0	0	0	0	0	0
	B7HWA9	0	0	0	0.0741249	0.0519527	0.0394076	0.0510908	0.0576069	0.0215808	0	0	0	0	0	0	0.00737799	0	0
thiS	B7HWF3	0	0	0	0	0	0	0	0	0	0	0	0	0	0	0.162734	0.0686742	0	0
thiG	B7HWF4	0	0	0	0	0	0	0	0	0.0275231	0	0	0	0	0	0.490543	0.338743	0.015421	0
thiD1	B7HWF6	0	0	0	0	0	0	0	0	0	0	0	0	0	0	0	0.0118867	0	0
	B7HWI8	0	0	0	0	0.0636732	0.024149	0.0313084	0.0353015	0.0528988	0	0	0	0	0	0	0	0	0
	B7HWW2	0	0	0	0	0	0	0	0	0	0	0	0	0	0	0	0.0119365	0	0
cccB	B7HX13	0	0	0	0	0	0	0	0	0	0	0	0	0	0	0	0.0152426	0	0.144856
	B7HX28	0	0	0	0	0	0	0	0	0.0116753	0	0	0	0	0	0	0	0	0
thiC	B7HX62	0	0	0	0	0	0	0.00899178	0	0.0341832	0	0	0	0	0	0.03077	0.225939	0.082995	0.0987206
	B7HX91	0	0	0	0	0	0	0.013482	0	0.00569479	0	0	0	0	0	0	0	0	0
galE1	B7HX97	0	0	0	0	0	0	0	0	0	0	0	0	0	0	0	0.0138969	0.0113877	0
tagU	B7HX99	0	0	0	0	0	0	0.0174997	0.00986578	0.0295675	0	0	0	0	0	0	0.0151627	0	0
	B7HXA5	0	0	0	0	0	0	0	0	0	0	0	0	0	0	0	0.0201043	0	0
	B7HXC9	0	0	0	0	0	0	0	0	0	0	0	0	0	0	0.0730655	0.0616675	0	0
	B7HXK5	0	0	0	0	0	0	0	0	0	0	0	0	0	0	0	0.0161283	0.0198241	0.019159
	B7HXL6	0	0	0	0.0196875	0.0206979	0.0157	0.0305318	0.0114753	0.0171955	0	0	0	0	0	0.0139307	0	0.0144519	0
	B7HXM4	0	0	0	0	0	0.0336289	0.0435989	0.0491595	0.0368324	0	0	0	0	0	0.328232	0.730348	0.0309556	0
	B7HXS5	0	0	0	0.426029	0.703833	0.630946	0.283155	0.390217	0.239209	0	0	0	0	0	0	0	0	0
	B7HXU0	0	0	0	0	0	0	0	0	0.00757605	0	0	0	0	0	0	0	0	0
	B7HXU1	0	0	0	0	0	0	0.0514209	0.0386527	0.0144801	0	0	0	0	0	0	0	0	0
	B7HXV0	0	0	0	0	0	0	0	0	0	0	0	0	0	0	0.0473753	0.0199924	0	0
	B7HXX7	0	0	0	0	0	0	0	0	0	0	0	0	0	0	0	0	0.0952019	0.0920079
	B7HY06	0	0	0	0	0	0	0	0	0	0	0	0	0	0	0	0.00886063	0	0
fabZ	B7HY36	0	0	0	0	0.0376336	0.0285462	0.0925232	0.0208647	0.0937964	0	0	0	0.387887	0.144749	0.937182	0.716161	0.972243	1.0666
	B7HY46	0	0	0	0	0	0	0.0109944	0.0247933	0.0092881	0	0	0	0	0	0	0	0	0
atpD	B7HY64	0	0	0	0.100652	0.0823029	0.0713476	0.0809375	0.0717045	0.0439561	0	0	0	0	0	0.0870475	0.120221	0.0492567	0.0555382
atpG	B7HY65	0	0	0	0	0	0	0.00935564	0	0	0	0	0	0	0	0.0256121	0.032425	0	0
atpA	B7HY67	0	0	0	0.0418719	0.0330156	0.0166955	0.0487017	0.0366088	0.0228574	0	0	0	0	0	0.0592562	0.0781444	0.061473	0.0594106
glyA	B7HY76	0	0	0	0.088638	0.093187	0.0908807	0.104733	0.110709	0.0774184	0	0.125775	0	0.205815	0.102406	0.474875	0.317612	0.492641	0.44018
	B7HY78	0	0	0	0	0	0	0	0	0	0	0	0	0	0	0.0254113	0.107236	0	0
	B7HY82	0	0	0	0	0	0	0	0	0	0	0	0	0	0	0.0182455	0.0307985	0	0
	B7HY85	0	0	0	0	0	0	0	0	0	0	0	0	0	0	0	0.00909574	0	0
rpmE2	B7HY91	0	0	0	0	0	0	0	0	0	0	0	0	0	0	0	0.129786	0	0
spo0F	B7HY96	0	0	0	0	0	0	0	0	0	0	0	0	0	0	0.0293279	0.0247528	0	0
pyrG	B7HY98	0	0	0	0	0	0	0	0	0	0	0	0	0	0	0.00677233	0.0314373	0	0
rpoE	B7HY99	0	0	0	0.0824642	0.0577976	0.0438411	0.042629	0.0320439	0.0240087	0	0	0	0	0	0.0972514	0.0656644	0	0
	B7HYA3	0	0	0	0	0	0	0	0	0	0	0	0	0	0	0	0.00545909	0.0268403	0.0389097
	B7HYA4	0	0	0	0	0	0	0.00660059	0	0.0111524	0	0	0	0	0	0	0.0076255	0	0.0181169
	B7HYC6	0	0	0	0	0	0	0	0	0	0	0	0	0	0	0.011032	0.00931108	0.0457791	0.0221216
	B7HYC9	0	0	0	0	0	0	0	0	0	0	0	0	0	0	0	0.0105472	0	0
	B7HYD4	0	0	0	0	0	0	0	0	0	0	0	0	0	0	0.0148422	0.0187902	0	0
	B7HYD6	0	0	0	0	0	0	0	0	0	0	0	0	0	0	0	0.0448148	0	0
	B7HYE9	0	0	0	0	0	0.015921	0	0	0	0	0	0	0.108168	0.242192	0.550947	0.524616	0.381039	0.453237
gerQ	B7HYF2	0	0	0	0	0	0	0	0	0	0	0	0	0	0	0	0	0.156394	0.0755734
ung	B7HYF9	0	0	0	0	0	0	0	0	0	0	0	0	0	0	0.046661	0.0262547	0.0484066	0
	B7HYG2	0	0	0	0	0	0	0	0	0	0	0	0	0	0	0	0	0	0
hom2	B7HYG5	0	0	0	0	0	0	0	0	0	0	0	0	0	0	0	0.00730326	0	0
	B7HYM5	0	0	0	0	0	0	0	0	0	0	0	0	0	0	0	0.0627078	0	0
	B7HYP0	0	0	0	0.172218	0.181057	0.0915577	0.148377	0.167301	0.100279	0	2.28082	2.84414	1.86614	1.39278	0.36558	0.0685667	0.294977	0.122177
	B7HYP7	0	0	0	0	0.0143426	0.0435171	0.0282093	0.0159036	0	0	0	0	0	0	0	0	0	0
	B7HYP9	0	0	0	0.067946	0.10715	0.108368	0.105372	0.138613	0.103855	0	0	0	0	0	0	0.0202889	0	0
	B7HYS5	0	0	0	0	0	0	0	0	0	0	0	0	0	0	0	0.0752135	0	0
yhaM	B7HYS8	0	0	0	0	0	0	0	0	0	0	0	0	0	0	0.0114011	0.0240564	0	0
	B7HYT2	0	0	0	0	0	0	0	0	0	0	0	0	0	0	0	0.00924796	0	0
	B7HYX3	0	0	0	0	0	0	0	0	0	0	0	0	0	0	0.0114121	0.0337113	0	0
	B7HYX7	0	0	0	0	0	0	0	0	0	0	0	0	0	0	0.0127283	0	0	0.0127615
	B7HYY0	0	0	0	0	0	0	0	0	0	0	0	0	0	0	0	0	0.0938282	0.0906803
	B7HYZ0	0	0	0	0	0	0	0	0	0	0	0	0	0	0	0	0	0.0317249	0.0306606
	B7HYZ7	0	0	0	0	0	0	0	0	0	0	0	0	0	0	0	0	0.0401601	0.0388127
	B7HZ01	0	0	0	0	0	0	0	0	0	0	0	0	0	0	0	0	0.0126251	0.0244031
	B7HZ13	0	0	0	0	0	0	0	0	0	0	0	0	0	0	0.0733598	0.0464369	0	0
	B7HZ18	0	0	0	0	0	0	0	0	0	0	0	0	0	0	0.0905012	0.0572874	0	0
bla2	B7HZ26	0	0	0	0	0	0	0.0105461	0	0.026728	0	0	0	0	0	0	0	0	0
	B7HZ49	0	0	0	0	0	0	0	0	0	0	0	0	0	0	0	0.0343378	0	0
	B7HZ50	0	0	0	0	0	0	0	0	0	0	0	0	0	0	0.0304092	0.0641635	0	0
	B7HZ78	0	0	0	0	0	0	0.0164101	0.0277546	0.00693165	0	0	0	0	0	0	0	0	0
selO	B7HZ82	0	0	0	0	0	0	0	0	0	0	0	0	0	0	0	0.00620004	0	0
	B7HZB0	0	0	0	0	0	0	0	0	0	0	0	0	0	0	0.021219	0.0268633	0	0
msrAB	B7HZC1	0	0	0	0	0	0	0	0	0	0	0	0	0	0	0	0.0139047	0	0
nos	B7HZC9	0	0	0	0	0	0	0	0	0	0	0	0	0	0	0	0.012496	0	0
	B7HZF1	0	0	0	0	0	0	0.00594774	0	0.015074	0	0	0	0	0	0	0	0	0
rplI	B7HZF6	0	0	0	0	0	0	0	0	0	0	0	0	0	0	0.346171	0.469557	0	0
rpsF	B7HZG1	0	0	0	0.10152	0	0.0404788	0.0524796	0	0.0443348	0	0	0	0	0	0.287338	0.333456	0	0
ychF	B7HZG2	0	0	0	0	0	0	0	0	0	0	0	0	0	0	0	0.0083941	0	0
	B7HZI0	0	0	0	0	0	0	0	0	0	0	0	0	0	0	0.0755636	0.0318879	0	0
hemE	B7HZJ8	0	0	0	0	0	0	0	0	0	0	0	0	0	0	0	0.0304917	0	0
hemH	B7HZJ9	0	0	0	0	0	0	0	0	0	0	0	0	0	0	0	0.0145321	0	0
	B7HZM9	0	0	0	0	0	0	0	0	0	0	0	0	0	0	0	0.0100545	0	0
	B7HZQ0	0	0	0	0	0	0	0.0474318	0.0267406	0.0100176	0	0	0	0	0	0	0	0	0
	B7HZQ2	0	0	0	0	0	0	0.0118609	0.0267472	0	0	0	0	0	0	0	0	0.0336852	0.0488327
addB	B7HZR4	0	0	0	0	0	0	0	0	0	0	0	0	0	0	0	0.00509483	0	0
addA	B7HZR5	0	0	0	0	0	0	0	0	0	0	0	0	0	0	0	0.00717945	0	0
	B7HZT6	0	0	0	0	0	0	0	0	0	0	0	0	0	0	0.0440244	0.0557351	0	0
clpB	B7HZU5	0	0	0	0	0	0	0	0	0	0	0	0	0	0	0	0.00350436	0	0
	B7HZW0	0	0	0	0	0	0	0	0	0	0	0	0	0	0	0.0114473	0.0241539	0	0
cspB2	B7HZX9	0	0	0	0.0776535	0	0	0	0.0452618	0.0339121	0	0	0	0	0	0.439574	0.185501	0.285012	0.05509
	B7HZY1	0	0	0	0	0	0	0	0	0	0	0	0	0	0	0.0249199	0.0210325	0	0
	B7HZZ0	0	0	0	0	0.014641	0	0	0	0.0182453	0	0	0	0	0	0	0	0	0
	B7I044	0	0	0	0	0	0	0	0	0	0	0	0	0	0	0.0105274	0.0133278	0	0
	B7I047	0	0	0	0	0	0	0	0	0	0	0	0	0	0	0.0259026	0.0218619	0	0
	B7I053	0	0	0	0	0	0	0.0538552	0	0	0	0	0	0	0	0.147435	0.155544	0	0.0739094
	B7I090	0	0	0	0	0	0	0	0	0	0	0	0	0	0	0	0.0314958	0	0
	B7I091	0	0	0	0	0	0	0	0	0	0	0	0	0	0	0	0.0530338	0	0.0419999
	B7I0B0	0	0	0	0	0	0	0	0	0	0	0	0	0	0	0	0.0232135	0	0
	B7I0B1	0	0	0	0	0	0	0	0	0	0	0	0	0	0	0.0284977	0.0120261	0	0
	B7I0E0	0	0	0	0	0	0	0	0	0.0251341	0	0	0	0	0	0.20362	0.21482	0.0211238	0
trpD	B7I0E9	0	0	0	0	0	0	0	0	0	0	0	0	0	0	0.0328612	0.0416024	0	0
trpC	B7I0F0	0	0	0	0.0201087	0.0211407	0.0160358	0.010395	0	0.0351267	0	0	0	0	0	0.355718	0.234177	0	0
trpB	B7I0F2	0	0	0	0.288324	0.316899	0.282181	0.108397	0.129861	0.188871	0	0	0	0	0	0.333843	0.305244	0	0
trpA	B7I0F3	0	0	0	0.0202133	0.0850028	0.0805963	0.0835926	0.0117817	0.0617917	0	0	0	0	0	0.429083	0.319896	0.0445135	0
odhA	B7I0H2	0	0	0	0	0	0	0	0	0	0	0	0	0	0	0	0.00481144	0	0
potD	B7I0J5	0	0	0	0	0	0	0.014828	0	0.0313168	0	0	0	0	0	0	0	0	0
	B7I0P8	0	0	0	0	0	0	0	0	0.00466007	0	0	0	0	0	0	0	0	0.0151405
	B7I1K3	0	0	0	0	0	0.0289251	0.0187502	0	0.0633609	0	0	0	0	0	0.102662	0.075816	0.0266256	0
	B7I1K4	0	0	0	0	0	0	0	0	0	0	0	0	0	0	0	0.00994854	0	0
	B7I1N1	0	0	0	0	0	0	0	0	0	0	0	0	0	0	0	0.0119899	0	0
dps1	B7HNG8	0	0	0	0.102715	0.0719911	0.0546072	0	0	0	0	0	0	0	0.138448	0.266494	0.0920134	0.376996	0.267189
	B7HMW3	0	0	0	0	0	0	0	0	0	0	0	0	0	0	0.0585353	0.061755	0	0
	B7HK76	0	0	0	0	0	0	0	0	0	0	0	0	0	0	0	0.0370036	0	0
	B7HUB3	0	0	0	0.0226833	0.0119237	0.0180889	0.0293147	0.0132214	0.0198121	0	0.112655	0	0	0	0	0	0	0.00804614
	B7HQ00	0	0	0	0	0	0	0	0	0	0	0	0	0	0	0	0.0748777	0	0
	B7HRF4	0	0	0	0	0	0	0.0572936	0.0861344	0.0403348	0	0	0	0	0	0	0	0.0406789	0.0655235
abrB	B7HPU8	0	0	0	0	0	0	0	0	0	0	0	0	0	0	0.0385835	0.130258	0	0
	B7HR86	0	0	0	0	0	0	0	0	0	0	0	0	0	0	0	0.00887989	0.0436591	0.126583
	B7HPJ0	0	0	0	0	0	0	0	0	0	0	0	0	0	0	0.0311707	0.0591933	0	0
purE	B7HS26	0	0	0	0	0	0	0.017325	0	0.0146362	0	0	0	0	0	0.118573	0.0800605	0.221415	0.237763
	B7HNR9	0	0	0	0	0	0	0	0	0	0	0	0	0	0	0.0251852	0.0531409	0	0
	B7HXF5	0	0	0	0	0	0	0	0	0	0	0	0	0	0	0	0	0.0416468	0.0804991
	B7HR02	0	0	0	0	0	0.00949836	0.0307859	0.0347123	0.0312095	0	0	0	0	0	0	0	0	0
aroC	B7HVI2	0	0	0	0	0	0	0	0	0	0	0	0	0	0	0	0.0241605	0	0
fabG	B7HLI4	0	0	0	0	0	0	0	0	0	0	0	0	0	0	0	0.0326287	0	0
fabH	B7HZV0	0	0	0	0	0	0	0	0	0	0	0	0	0	0	0	0.0306349	0	0
	B7HXN3	0	0	0	0	0	0	0	0	0	0	0	0	0	0	0	0	0.0285858	0.0345334
	B7HZT7	0	0	0	0	0	0	0	0	0	0	0	0	0	0	0.0123079	0.0415517	0	0
	B7HSR7	0	0	0	0	0	0	0	0	0	0	0	0	0	0	0.0697488	0.0883022	0.180895	0.279722
	B7HV77	0	0	0	0	0	0	0	0	0	0	0	0	0	0	0	0	0.0249935	0.04831
qcrA	B7HL32	0	0	0	0.0355413	0	0.0566853	0.0734908	0.10358	0.0776064	0	0	0	0	0	0	0	0	0
ptsH1	B7HN27	0	0	0	0	0	0	0	0	0.0272075	0	0	0	0	0	0.176334	0.223239	0.0457327	0
	B7HM02	0	0	0	0	0	0	0	0	0	0	0	0	0	0	0.25218	0.10642	0.203478	0.140465
qoxA	B7HWC4	0	0	0	0	0	0	0.0354813	0.0400066	0.067443	0	0	0	0	0	0	0.00512384	0	0
	B7HZV9	0	0	0	0	0	0	0	0	0	0	0	0	0	0	0.0106343	0.0269261	0	0
resA	B7HKY2	0	0	0	0	0	0	0.0445189	0.0669291	0.0125365	0	0	0	0	0	0	0	0.0632175	0.162924
	B7HUX3	0	0	0	0	0	0.0154103	0.039958	0.0225271	0.0337566	0	0	0	0	0	0	0	0	0
	B7HLP1	0	0	0	0	0	0	0	0	0	0	0	0	0	0	0.0122258	0.0412744	0	0
	B7HN19	0	0	0	0	0	0	0	0	0	0	0	0	0	0	0.0608793	0.0642278	0.18947	0.274671
sufA	B7HUW9	0	0	0	0	0	0	0.0185355	0	0	0	0	0	0	0	0.0253716	0.0856547	0	0
	B7HTP5	0	0	0	0	0.0705355	0	0.208096	0.19553	0.2051	0	0	0	0	0	0	0	0	0
	B7HV86	0	0	0	0	0	0	0	0	0	0	0	0	0	0	0	0.0535022	0.0219209	0.0423708
	B7HZ66	0	0	0	0	0	0	0	0	0	0	0	0	0	0	0	0.0464026	0	0
	B7HPZ8	0	0	0	0	0	0	0	0	0	0	0	0	0	0	0.00952519	0.0241179	0	0
menB	B7HTW5	0	0	0	0	0	0	0	0	0	0	0	0	0	0	0.0136001	0.0286963	0	0
	B7HVC6	0	0	0	0	0	0	0	0	0	0	0	0	0	0	0.0229061	0.0289992	0	0
gyrA	B7HPS2	0	0	0	0	0	0	0	0.00361129	0	0	0	0	0	0	0	0.0111004	0.00909606	0.00879089
	B7HXV3	0	0	0	0	0.0126768	0.0192314	0.0186997	0.0140564	0.0263292	0	0	0	0	0	0	0.00720109	0.00885127	0.0171086
tal	B7HYW5	0	0	0	0	0	0	0.0123166	0	0	0	0	0	0.129088	0	0.0674363	0.0355727	0	0.016903
	B7HKW2	0	0	0	0	0	0	0	0	0	0	0	0	0	0	0	0.0185078	0.10237	0.109929
ftsZ	B7HM27	0	0	0	0	0	0	0	0	0	0	0	0	0	0	0	0.0251605	0	0
galE2	B7HZD9	0	0	0	0	0	0	0	0	0	0	0	0	0	0	0.0108102	0.0410572	0	0
cspA1	B7HZQ7	0	0	0	0	0	0.12227	0.23778	0.223422	0.133918	0	0	0	0	0	0.922178	1.21326	0.168825	0
folP	B7HPY3	0	0	0	0	0	0	0	0	0	0	0	0	0	0	0	0.0501911	0	0
	B7HM50	0	0	0	0.0326321	0	0.0260227	0.168688	0.152162	0.128257	0	0	0	0	0	0.0230901	0.0876965	0	0
	B7HV49	0	0	0	0	0	0	0.0319557	0.0120104	0.0179975	0	0	0	0	0	0	0	0	0
	B7HSI1	0	0	0	0	0	0	0	0	0.0157765	0	0	0	0	0	0.127811	0.140235	0	0
	B7HSL5	0	0	0	0	0	0	0	0	0	0	0	0	0	0	0.128013	0.135054	0.0332005	0.0641732
	B7HLI9	0	0	0	0	0	0	0	0	0	0	0	0	0	0	0.00668404	0.0197447	0	0
	B7HYW6	0	0	0	0	0	0	0	0	0	0	0	0	0	0	0.0495839	0.0575423	0.0385792	0.0497131
divIC1	B7HPX1	0	0	0	0	0.0427367	0.064834	0.126083	0.0473879	0.0532576	0	0	0	0	0	0	0	0	0
	B7HWE7	0	0	0	0	0	0	0	0	0	0	0	0	0	0	0.0750952	0.0570425	0	0
dps2	B7HVX5	0	0	0	0.0338268	0.0711255	0.0539507	0.0524592	0.0591498	0.0147725	0	0	0	0	0.136784	0.215419	0.0808064	0.347633	0.311972
	B7HZJ6	0	0	0	0	0	0.0241272	0	0.0176348	0.0264256	0	0	0	0	0	0.0642248	0.117446	0	0
yycF	B7HZF3	0	0	0	0	0	0	0	0	0	0	0	0	0	0	0.0150231	0.0570579	0	0
ssb1	B7HZG0	0	0	0	0	0	0	0	0	0	0	0	0	0	0	0.0430036	0.0544427	0	0
	B7HXN7	0	0	0	0	0	0.0256773	0.0166449	0.0187678	0	0	0	0	0	0	0.0911347	0.105762	0	0
	B7HYE6	0	0	0	0	0	0	0.108727	0.0612969	0.0229632	0	0	0	0	0	0	0	0	0
	B7HKV9	0	0	0	0	0	0	0	0	0.00340812	0	0	0	0	0	0	0	0	0
	B7HZ07	0	0	0	0	0	0	0	0	0	0	0	0	0	0	0	0	0.119919	0.231792
	B7HZL5	0	0	0	0	0	0	0	0	0	0	0	0	0	0	0.0303583	0.0512449	0.062988	0.0456561
	B7HLA7	0	0	0	0	0	0	0	0	0.00796437	0	0	0	0	0	0	0.0435655	0	0
	B7HU37	0	0	0	0.0244856	0.0128711	0.0195262	0.0253152	0.0142719	0.0481191	0	0	0	0	0	0	0.0073115	0	0
thyA	B7HQ32	0	0	0	0	0	0	0	0	0	0	0	0	0	0	0	0.0324315	0	0
	B7HRG7	0	0	0	0	0	0.0163315	0.0211733	0	0.0536618	0	0	0	0	0	0.0144911	0.0428068	0	0
polA	B7HRM6	0	0	0	0	0	0	0	0	0	0	0	0	0	0	0	0.0103033	0	0
	B7HSL4	0	0	0	0	0	0	0	0.00882752	0.0198419	0	0	0	0	0	0.0107164	0.040701	0	0
bacB	B7HR47	0	0	0	0	0	0	0	0	0	0	0	0	0	0	0.0604695	0.0408291	0	0
	B7HS11	0	0	0	0	0	0	0	0	0	0	0	0	0	0	0	0.0439937	0	0
	B7HWJ9	0	0	0	0	0	0	0	0	0	0	0	0	0	0	0.00948363	0.040021	0.00983842	0.0190167
	B7HQL3	0	0	0	0.0162691	0.017104	0.0129739	0.0504608	0.0663792	0.0355244	0	0	0	0	0	0	0	0	0
sodA1	B7HPH5	0	0	0	0.0252384	0.0530673	0.040253	0.0391401	0.0147107	0.0220438	0	0	0	0.13674	0.204111	0.107151	0.0678265	0.333477	0.268574
	B7HN71	0	0	0	0	0	0	0	0	0	0	0	0	0	0	0.114712	0.11618	0	0
	B7HY77	0	0	0	0	0	0	0	0	0	0	0	0	0	0	0.0586236	0.0824642	0.0608168	0.0391843
	B7HK89	0	0	0	0	0	0	0	0	0	0	0	0	0	0	0.0542118	0.0800711	0	0
gyrB	B7HPS1	0	0	0	0	0	0	0	0	0	0	0	0	0	0	0.00562956	0.0166298	0	0
ndk	B7HL25	0	0	0	0	0	0	0	0	0.0300954	0	0	0	0	0	0.0975254	0.10289	0.0505869	0.0244449
	B7HNR8	0	0	0	0	0	0	0	0	0	0	0	0	0	0	0	0.017838	0.116937	0.113014
	B7HQ26	0	0	0	0.308348	0.405216	0.34835	0.332078	0.26959	0.258096	0	0	0	0	0	0.036364	0.0460369	0	0
ftsH	B7HPX6	0	0	0	0	0	0	0	0	0	0	0	0	0	0	0.0115428	0.0267909	0	0
mnmG	B7HZG9	0	0	0	0	0	0	0	0	0	0	0	0	0	0	0	0.0194402	0	0
yqjI	B7HQZ6	0	0	0	0	0	0	0	0	0	0	0	0	0	0	0	0.0230377	0	0
	B7HZ42	0	0	0	0	0	0	0	0	0	0	0	0	0	0	0.0107306	0.0407549	0	0.0107586
	B7HQD5	0	0	0	0.0236488	0	0.0377178	0.134475	0.0275684	0.0413108	0	0	0	0	0	0	0.0282465	0	0
	B7HXX5	0	0	0	0.162908	0.171269	0.187651	0.168427	0.137156	0.110668	0	0	0	0	0	0	0.016215	0	0
	B7HKU8	0	0	0	0.148223	0.103887	0.157602	0.229867	0.287982	0.172615	0.78909	0.981516	2.44786	3.47994	3.99575	0.769127	0.162286	1.74088	1.71752
	B7I0E8	0	0	0	0	0	0	0	0	0	0	0	0	0	0	0.129414	0.124829	0	0
	B7HVK2	0	0	0	0	0	0	0	0	0	0	0	0	0	0	0.357432	0.260536	0	0
purD	B7HS37	0	0	0	0	0	0	0	0	0.0216212	0	0	0	0	0	0.0350321	0.0517426	0.00908567	0
	B7HYC0	0.770092	0	0	2.25704	2.10922	1.6999	1.46924	1.75408	0.876154	3.3377	3.73647	4.1416	1.81163	1.85914	1.00555	0.898614	0.429542	0.237218
	B7HUF6	0	0	0	0	0	0	0.00952639	0.00537069	0	0	0	0	0	0	0	0	0.0405828	0.052295
tyrS	B7HSJ5	0	0	0	0	0	0	0	0	0	0	0	0	0	0	0	0.0290598	0	0
	B7HKV7	0	0	0	0.0196388	0.0825868	0.0939666	0.111673	0.0343406	0.137224	0	0	0	0	0	0	0	0	0
sucD	B7HLG8	0	0	0	0	0	0	0	0	0.00800358	0	0	0	0	0	0.0389039	0.0766149	0	0
rpe	B7HLJ3	0	0	0	0	0	0	0	0	0	0	0	0	0.26741	0.0997902	0.157158	0.125273	0.235499	0.262613
	B7HLC1	0	0	0	0	0	0.009269	0	0	0.00507598	0	0	0	0	0	0	0.0208244	0.059725	0.0824589
	B7HZQ3	0	0	0	0.0710446	0.0746906	0.0944249	0.0244838	0.124229	0.0517099	0	0	0	0	0	0	0	0	0
divIVA	B7HLN0	0	0	0	0	0.0304571	0.0231026	0.0149759	0.0168859	0.0759101	0	0	0	0	0	0.122995	0.12976	0	0
	B7HW68	0	0	0	0	0	0	0	0	0	0	0	0	0	0	0.112211	0.094706	0	0
	B7I0K1	0	0	0	0.112647	0.157905	0.119775	0.14558	0.0984881	0.0901896	0	0	0	0	0	0.0132847	0.0168185	0	0
	B7HZ62	0	0	0	0	0	0	0.118267	0.133351	0.0142732	0	0	0	0.177077	1.18945	0.185012	0.0585564	0.623783	0.510108
pheT	B7HRK1	0	0	0	0	0	0	0	0	0	0	0	0	0	0	0	0.019303	0	0
	B7HKS5	0	0	0	0	0	0	0	0	0	0	0	0	0	0	0.00944667	0.0398651	0	0
	B7HKT8	0	0	0	0	0	0	0	0	0	0	0	0	0	0	0.0391918	0.0661559	0	0
maP3	B7HYB7	0	0	0	0	0	0	0	0	0	0	0	0	0	0	0.0747822	0.100986	0	0
	B7HT80	0	0	0	0	0	0	0.00399372	0	0	0	0	0	0	0.0312401	0.00546663	0	0.039698	0.0602896
sigA	B7HPJ2	0	0	0	0	0	0	0	0	0	0	0	0	0	0	0.01872	0.0355494	0	0
	B7HVZ2	0	0	0	0.0166727	0	0.0132957	0.0172375	0.00971799	0.0145623	0	0	0	0	0	0	0	0.19582	0.189251
	B7HVE3	0	0	0	0	0	0	0	0	0	0	0	0	0	0	0.0107276	0.0497978	0	0
trmU	B7HQF4	0	0	0	0	0	0	0	0	0	0	0	0	0	0	0.00967169	0.0408147	0	0
hisC	B7HL28	0	0	0	0.0137415	0.0144468	0.0109583	0	0.00800952	0.00600108	0	0	0	0	0	0.00972337	0.0369295	0	0
	B7HLB7	0	0	0	0.0669424	0.035189	0.0266918	0.0951642	0.0780374	0.0438517	0	0	0	0	0	0.0118419	0.0149919	0	0
dacA	B7HPS5	0	0	0	0	0	0.0189568	0.0184327	0.0138557	0.0259533	0	0	0	0	0	0.00841026	0.0283931	0.00872489	0.0252965
	B7HMY8	0	0	0	0	0	0	0	0	0	0	0	0	0	0	0	0	0.0367818	0.0888694
	B7HXQ0	0	0	0	0	0	0	0	0	0	0	0	0	0	0	0.0228696	0.0530806	0.0237252	0.0229292
bacC	B7HR45	0	0	0	0	0	0	0	0	0	0	0	0	0	0	0.0273692	0.0307996	0	0
dat2	B7HX68	0	0	0	0	0	0	0	0	0	0	0	0	0	0	0.0121265	0.0204696	0.113221	0.133739
	B7HNL1	0	0	0	0	0	0	0	0	0	0	0	0	0	0	0.0806392	0.10209	0	0
	B7HMQ5	0	0	0	0	0	0	0	0	0	0	0	0	0	0.0533091	0.0373137	0.0236196	0.0967741	0.112233
	B7HQJ1	0	0	0	0	0	0	0	0	0	0	0	0	0	0	0.0835611	0.0705258	0.0866872	0.0502673
	B7HPC8	0	0	0	0	0	0	0.0350391	0.033864	0.0422873	0	0	0	0	0	0	0	0	0
	B7HN23	0	0	0	0	0	0	0	0	0	0	0	0	0	0	0.0882232	0.0819067	0.073219	0.0353812
	B7HV81	0	0	0	0	0	0.0148997	0.0965851	0.119794	0.0244786	0	0	0	0	0	0	0	0	0
ackA	B7HRT5	0	0	0	0	0	0	0	0	0	0	0	0	0	0	0.0280871	0.055313	0	0
	B7HWD7	0	0	0	0.0605234	0.0636296	0.0482648	0.031287	0.0352773	0.0264313	0	0	0	0	0	0.685212	0.361451	0.0888558	0
	B7HN68	0	0	0	0.0619583	0.0217127	0.049409	0.0747336	0.108341	0.135289	0	0	0	0	0	0.0146137	0.043169	0	0
	B7HK99	0	0	0	0	0	0.0559968	0.0362991	0.0409287	0.0153328	0	0	0	0	0	0.248432	0.199194	0.0773179	0.049816
	B7HVZ7	0	0	0	0	0	0	0	0	0.006004	0	0	0	0	0	0.0389124	0.0492633	0.010092	0.00975346
	B7HLC2	0	0	0	0	0	0	0	0	0	0	0	0	0	0	0.00828898	0.0419755	0.0515945	0.0664846
rplF	B7HQV9	0	0	0	0.0293102	0.0616289	0.0934945	0.0454548	0.0341681	0.0640005	0	0	0	0	0	0.207396	0.140034	0	0
	B7HKI6	0	0	0	0	0	0	0	0	0	0	0	0	0	0	0.038982	0.0493513	0.0606605	0.0390836
	B7HRI8	0	0	0	0	0.0370155	0.0280773	0.0819032	0.112871	0.0768799	0	0	0	0	0	0.0498265	0.036797	0.0387679	0.0249782
	B7HYF7	0	0	0	0	0	0	0	0	0	0	0	0	0	0	0.0265133	0.0839148	0	0
	B7HKE1	0	0	0	0.0158245	0.0332733	0.0504774	0.0245409	0.0322827	0.038009	0	0	0	0	0	0	0.0118131	0	0
	B7HQ70	0	0	0	0	0	0	0	0	0	0	0	0	0	0	0.0625112	0.0879327	0.843047	0.77298
citC	B7HRN3	0	0	0	0	0	0	0	0	0	0	0	0	0	0	0.00861666	0.0363624	0	0
ilvE1	B7HKC0	0	0	0	0.0345093	0.0181402	0.0137598	0.0535177	0.0201144	0.0527471	0	0	0	0	0	0.0488369	0.0566754	0.0633299	0.0856873
	B7HZ54	0	0	0	0	0	0.0134079	0.0608404	0.0098	0.0734258	0	0	0	0	0	0	0.0301232	0	0
	B7HW01	0	0	0	0	0.026877	0.0815477	0.0132155	0.014901	0.167467	0	0	0	0	0	0	0	0	0
	B7HQY9	0	0	0	0	0	0	0.0165694	0.0186826	0.0559913	0	0	0	0	0	0	0	0	0
	B7HQI3	0	0	0	0.070418	0.0740319	0.0935922	0.109206	0.0820891	0.164012	0	0	0	0	0	0	0	0	0
hemH	B7HZS9	0	0	0	0	0	0	0	0	0	0	0	0	0	0	0.0557291	0.0658497	0	0
mreC	B7HQK9	0	0	0	0.018255	0.0191918	0.0145576	0.0377469	0.0744819	0.0318886	0	0	0	0	0	0.0258341	0.0545101	0	0
	B7HRP7	0	0	0	0	0	0	0	0	0	0	0	0	0	0	0.081262	0.0636864	0.0240863	0.0581956
	B7I060	0	0	0	0.0534028	0.0561434	0.0638796	0.220848	0.217888	0.163251	0	0	0	0	0	0.0188936	0.0239194	0	0
	B7HSM7	0	0	0	0	0	0	0	0	0	0	0	0	0	0	0.20254	0.186484	0	0
murA	B7HY45	0	0	0	0	0	0	0	0	0	0	0	0	0	0	0.017297	0.0437962	0	0
	B7I0I6	0	0	0	0.0987648	0.0830668	0.0472564	0.153166	0.138161	0.181153	0	0	0	0	0	0	0.00589831	0	0
recA	B7HLB4	0	0	0	0	0	0	0	0	0	0	0	0	0	0	0.0917074	0.131582	0	0
	A1BYH6	0	0	0	0.503742	0.564901	0.535617	0.347206	0.391488	0.263988	0	1.66786	1.66383	1.63755	1.76537	0.285154	0.0401118	0.6656	0.643269
def	B7HMU5	0	0	0	0	0	0	0	0	0.024251	0	0	0	0	0	0.255406	0.1824	0	0
bacF	B7HR48	0	0	0	0	0	0	0	0	0	0	0	0	0	0	0	0.00637208	0	0
	B7HT11	0	0	0	0	0	0	0	0	0	0	0	0	0	0	0	0.0151622	0	0
	B7HYF0	0	0	0	0	0	0.00967145	0.0188081	0.00706897	0.0688529	0	0	0	0	0	0	0	0.0534156	0.0688314
ileS1	B7HQ07	0	0	0	0	0	0	0	0	0	0	0	0	0	0	0	0.0144156	0	0
	B7HRW3	0	0	0	0.128199	0.107823	0.204467	0.145797	0.134502	0.100775	0	0	0	0	0	0	0.0153123	0	0
	B7HUD6	0	0	0	0.593112	0.448957	0.454062	0.41698	0.442505	0.300461	0	0.235651	0.293853	0.514151	0.959337	0.218234	0.191274	0.313474	0.302957
	B7HNE0	0	0	0	0	0	0	0	0	0	0	0	0	0	0	0	0.0100519	0.197685	0.226875
	B7HX10	0	0	0	0	0	0.00869469	0.0619983	0.0762605	0.0666606	0	0	0	0	0	0	0.0130227	0	0
bfmbAa	B7HNS5	0	0	0	0.0155635	0.0163622	0.0248224	0.0160908	0.018143	0.0135935	0	0	0	0	0	0.132151	0.0790045	0.159944	0.17666
nagA2	B7HN33	0	0	0	0	0	0	0	0	0.00599895	0	0	0	0.0744243	0	0.0485996	0.0697309	0.161337	0.165669
	B7HR07	0	0	0	0.0385213	0.0404982	0.0614381	0.149349	0.168397	0.0925246	0	0	0	0	0	0	0	0.0141385	0.0273283
estA	B7HW47	0	0	0	0	0	0	0	0	0	0	0	0	0	0	0.143249	0.114857	0	0
	B7HKM6	0	0	0	0.181673	0.119373	0.199205	0.246524	0.238256	0.138843	0	0	0	0	0	0	0.0203431	0.0166699	0
accB	B7HNU8	0	0	0	0.0320446	0.0336891	0.0511083	0.0331302	0.0186778	0.0419827	0	0	0	0	0	0.0680233	0.200941	0	0
sipT	B7HZR3	0	0	0	0.0527297	0.0277179	0.0420496	0.395242	0.430284	0.207249	0	0	0	0	0	0	0	0	0
hup1	B7HL20	0	0	0	0	0	0	0	0	0	0	0	0	0	0	0.209883	0.33657	0	0
	B7HLR5	0	0	0	0	0	0	0	0	0	0	0	0	0	0	0	0.00616824	0.303269	0.351714
bacE	B7HR46	0	0	0	0	0	0	0	0	0	0	0	0	0	0	0	0.0343359	0	0
	B7HN40	0	0	0	0	0	0.0577862	0.112377	0	0.0791136	0	0	0	0	0	0.435831	0.476031	0.0265962	0
fabI	B7I0D1	0	0	0	0	0	0	0	0	0	0	0	0	0	0	0.131314	0.0862007	0	0
	B7HV13	0	0	0	0.0246365	0.0259008	0.0261953	0.0551874	0.0335063	0	0	0	0	0	0	0.0116217	0.0122609	0.0241129	0.0582598
	A1BYN6	0	0	0	0.0577109	0.0849417	0.0828394	0.0835325	0.0672758	0.0907307	0	0.114647	0	0	0	0	0.0137861	0	0
nusG	B7HQT0	0	0	0	0	0	0	0	0	0	0	0	0	0	0	0.159839	0.126473	0	0
	B7HZ63	0	0	0	0.0947235	0	0.0503586	0.228509	0.276057	0.0689446	0	0	1.17325	2.05282	1.78747	0.491519	0.150852	0.811217	0.6496
	B7HMJ7	0	0	0	0.0326909	0.0687373	0.0955884	0.0675969	0.0825697	0.0380706	0	0	0	0	0	0	0.00976163	0	0
	B7HY40	0	0	0	0.0176526	0.0185586	0.0563087	0.155131	0.164627	0.092509	0	0	0	0	0	0	0	0	0
etfB	B7HRG6	0	0	0	0.020281	0.0213219	0.0161732	0.0524203	0.0591059	0.106283	0	0	0	0	0	0.0717532	0.12112	0	0
	B7I0F6	0	0	0	0	0	0	0	0	0	0	0	0	0	0	0.0156231	0.0197789	0.53485	0.469914
trx	B7HRG4	0	0	0	0.299011	0.157178	0.317931	0.231856	0.203332	0.130581	0	0	0	0	0	0.634731	0.639881	0.036582	0.0707094
rpoA	B7HQX1	0	0	0	0	0	0	0.00846384	0	0	0	0	0	0	0	0.0463414	0.0684465	0.0120188	0.0232311
	B7HLX2	0	0	0	0.100715	0.105884	0.112442	0.187429	0.164371	0.10556	0	0	0	0	0	0	0.00601479	0	0
guaC	B7HZE3	0	0	0	0	0	0	0	0	0	0	0	0	0	0	0.078171	0.0801143	0	0
	B7HUY2	0	0	0	0	0	0	0	0	0	0	0	0	0	0	0.171408	0.25317	0	0
	B7HMJ6	0	0	0	0.0377898	0.0264861	0.0401809	0.0586051	0.0660795	0.0605118	0	0	0	0	0	0	0.018807	0.00924667	0.0178729
	B7HRF7	0	0	0	0.234132	0.287173	0.248947	0.121032	0.113724	0.102248	0	0	0	0	0	0.0276116	0.0582607	0	0
	B7HNU9	0	0	0	0	0	0	0.287534	0.256663	0.141697	0	0	0	0	0	0	0	0	0
prfB	B7HX15	0	0	0	0	0	0	0	0	0	0	0	0	0	0	0.0278894	0.0902318	0	0
rpsC	B7HQV0	0	0	0	0	0	0	0	0	0	0	0	0	0	0	0.0666406	0.0984285	0	0
	B7HRJ0	0.395024	0.505145	0.334214	0.493122	0.315566	0.341951	0.543078	0.374903	0.290257	0	0.212961	0	0.348483	0.693571	0.273074	0.313702	0.267552	0.319417
	B7HV71	0	0	0	0.0180397	0.0189655	0.0143859	0.158533	0.136692	0.0945377	0	0	0	0	0	0	0.0215469	0	0
	B7HLA8	0	0	0	0	0	0	0.00458631	0	0	0	0	0	0	0	0.00627777	0.0476861	0	0
	B7HT95	0	0	0	0	0	0	0	0	0	0	0	0	0	0	0.184204	0.139922	0.477739	0.424774
dapA	B7HLD2	0	0	0	0	0	0	0	0	0	0	0	0	0	0	0.0907136	0.065625	0.0134439	0.0129929
mtnA	B7HT26	0	0	0	0	0	0	0	0	0	0	0	0	0	0	0.0316368	0.0311518	0.0328203	0.116304
hisS	B7HQG1	0	0	0	0	0	0	0.0123783	0.0139571	0.0104572	0	0	0	0	0	0.0254153	0.0572016	0.0175774	0.0424693
	B7HWF0	0	0	0	0.123024	0.145505	0.14716	0.15104	0.125487	0.154462	0	0	0	0	0	0.0217626	0.0872467	0.0338652	0.0436387
	B7HUK8	0	0	0	0	0	0	0	0	0	0	0	0	0	0	0.0273923	0.0462384	0.00947236	0
ccpA	B7HSL3	0	0	0	0	0	0	0	0	0.00676441	0	0	0	0	0	0.0328805	0.0740033	0	0
	B7HN66	0	0	0	0.0193682	0	0.0154453	0.0300365	0.0225782	0.0169166	0	0	0	0	0	0.342618	0.248687	0.270131	0.178626
	B7HUJ4	0	0	0	0.0231283	0.0243153	0.0368876	0.131515	0.17525	0.121205	0	0	0	0	0.093523	0.0327307	0.0138124	0.49235	0.393792
	B7HVG9	0	0	0	0.0745027	0.176234	0.193091	0.105912	0.0759944	0.227753	0	0	0	0	0	0	0	0	0
	B7HPI9	0	0	0	0	0	0	0	0	0	0	0	0	0	0	0.0297218	0.0836176	0.0102779	0.00993309
	B7HKD7	0	0	0	0	0	0	0	0	0	0	0	0	0	0	0	0	0.147714	0.142758
	B7HV44	0	0	0	0.917666	0.744245	0.669073	0.40661	0.427904	0.412205	0.418744	1.04172	0	0	0.106021	0.055657	0.0548037	0.0384928	0.0372013
	B7HTZ4	0	0	0	0.165088	0.144634	0.153592	0.0853404	0.0801873	0.0600797	0	0	0	0.149073	0.22252	0.292036	0.156104	0.383751	0.390396
	B7I1J0	0	0	0	0.0154227	0.0162142	0.0122989	0.0478356	0.0359577	0.12797	0	0	0	0	0	0	0.00921056	0	0
sodA2	B7HZD0	0	0	0	0.262097	0.200399	0.228012	0.209391	0.152768	0.187299	0	0	0	0.38728	0.192697	0.539512	0.284593	0.752091	0.726858
sufS	B7HUX0	0	0	0	0	0	0	0	0	0	0	0	0	0	0	0.0446916	0.0792116	0	0
	B7HMA6	0	0	0	0.0765419	0.0482821	0.0610389	0.142443	0.107074	0.10028	0	0	0	0	0	0.0216641	0.0274269	0	0
etfA	B7HRG5	0	0	0	0.0166497	0.0350084	0.0531098	0.0430346	0.0194093	0.0799824	0	0	0	0	0	0.106031	0.109377	0.0244439	0.0472476
	B7HLV4	0	0	0	0.0531248	0.0558512	0.0635471	0.0411934	0.038706	0.0754006	0	0	0	0	0	0	0.0317265	0	0
tpx	B7HRT7	0	0	0	0	0	0	0	0	0.0696359	0	0	0	0	0	0.564145	0.428526	0	0
	B7HN99	0	0	0	0	0	0	0	0	0	0	0	0	0	0	0.174557	0.169425	0.126761	0.0875057
	B7HQD0	0	0	0	0	0	0	0.0143179	0	0.0241916	0	0	0	0.150063	0.167999	0.137189	0.136464	0.142321	0.137547
srtB	B7HRI5	0	0	0	0.222437	0.257238	0.283814	0.114987	0.116687	0.339993	0	0	0	0	0	0	0.0265682	0	0
	B7HWD8	0	0	0	0	0	0	0	0	0	0	0	0	0	0	0.0256553	0	0.239536	0.270082
	B7HX98	0	0	0	0.0383177	0.0402842	0.0763918	0.227791	0.268011	0.158971	0	0	0	0	0.077472	0.0542265	0.0858137	0.168765	0.163103
	A1BYH8	0.697392	0	0.590035	6.359	5.0936	7.39524	5.55696	7.10406	4.69453	4.23165	1.12791	1.40648	0	0.153057	1.55342	1.45802	0.16671	0
sufB	B7HUW8	0	0	0	0	0	0	0	0	0	0	0	0	0	0	0.00770846	0.0683126	0	0
alaS	B7HQE6	0	0	0	0	0	0	0	0	0	0	0	0	0	0	0	0.0280371	0	0
	B7HX29	0	0	0	0	0	0	0	0	0	0	0	0	0	0	0.0584242	0.10273	0	0
	B7HVH3	0	0	0	0	0	0	0	0	0	0	0	0	0	0	0	0.0670685	0	0
	B7HMM9	0	0	0	0.0411434	0.043255	0.0656202	0.0779851	0.119906	0.203635	0	0	0	0	0	0	0	0	0
	B7HRU4	0	0	0	0.0179792	0.0189019	0.0143376	0.0278825	0.0314386	0.0392586	0	0	0	0	0	0.216273	0.144954	0.277155	0.255101
	B7HTR5	0	0	0	0	0	0	0.0116673	0.0263108	0.0197132	0	0	0	0	0	0.0319406	0.161748	0	0
	B7I035	0	0	0	0.02949	0.0310035	0.023517	0.0609783	0.060161	0.0965897	0	0	0	0	0	0	0	0	0
tal	B7HW93	0	0	0	0	0	0	0	0	0.0217007	0	0	0	0	0.200934	0.562576	0.244827	0.71129	0.6698
speE	B7HYD0	0	0	0	0.018367	0.0193096	0.0439406	0.0474731	0.0535278	0.0481264	0	0	0	0	0	0.116967	0.0767824	0.32358	0.377875
fbp2	B7HY93	0	0	0	0	0	0	0	0	0.00736254	0	0	0	0	0	0.16701	0.110752	0	0
	B7HVK0	0	0	0	0	0	0	0	0	0	0	0	0	0	0	0	0	0.434639	0.376603
yfiA	B7HX18	0	0	0	0	0	0	0	0	0.0473667	0	0	0	0	0	0.383734	0.218614	0.119427	0.0769468
gerM	B7HQP5	0	0	0	0	0	0	0.137659	0.129346	0.0581472	0	0	0	0	0	0	0	0	0
	B7HTZ1	0	0	0	0	0	0	0	0	0	0	0	0	0	0	0.0547325	0.101628	0	0
	B7HUR3	0	0	0	0.00891804	0.00937572	0.0142235	0.0368807	0.0103961	0.0311569	0	0	0	0	0	0.0315516	0.0639111	0	0.00632676
pepQ1	B7HNW1	0	0	0	0	0	0	0	0	0.0064692	0	0	0	0	0	0.1153	0.0973139	0	0
aceA	B7HZQ5	0	0	0	0	0	0	0	0	0	0	0	0	0	0	0	0	0.161483	0.26011
	B7HXS9	0	0	0	0	0	0.00953157	0.0123574	0.00696673	0.00521977	0	0	0	0	0	0.101489	0.0963644	0.219346	0.178069
	B7HWQ2	0	0	0	0.00987803	0.02077	0.0315092	0.0306381	0.0345456	0.0690215	0	0	0	0	0	0	0.00884885	0	0
	B7HWE6	0	0	0	0.377697	0.411262	0.344225	0.258004	0.251598	0.253307	0	0	0	0	0	0.0859032	0.0845863	0	0
	B7I0I5	0	0	0	0.338849	0.438449	0.332576	0.4177	0.501359	0.466704	0	0.258903	0	0	0.210799	0.0184436	0	0.0956678	0.11095
bfmbAb	B7HNS4	0	0	0	0.0319643	0	0.0254901	0.0247854	0.0465775	0.0418775	0	0	0	0	0	0.158323	0.219527	0.258101	0.283457
prfA	B7HY89	0	0	0	0	0	0	0	0	0	0	0	0	0	0	0.05969	0.0965588	0	0
aroC	B7HL26	0	0	0	0	0.0141804	0	0	0	0	0	0	0	0	0	0.0572645	0.116801	0	0
	B7HWJ3	0	0	0	0	0	0	0	0	0	0	0	0	0	0.32574	0.304002	0.248561	0.61104	0.476241
	B7I036	0	0	0	0.0585096	0.0922685	0.0933177	0.0226844	0.0255776	0.166087	0	0	0	0	0	0	0	0	0
	B7HTK2	0	0	0	0.49862	0.22072	0.272061	0.48838	0.673038	0.229213	0	0	0.325049	0	0	0.0185694	0.0470178	0	0
	B7HY87	0	0	0	0	0	0	0.205014	0.231162	0.0903633	0	0	0	0	0	0	0	0	0
spoIID	B7HY44	0	0	0	0	0	0	0.206066	0.241284	0.127216	0	0	0	0	0	0	0	0	0
clpP	A1BYZ2	0	0	0	0	0	0.0212962	0.0138049	0	0.0233248	0	0	0	0	0	0.774747	0.526301	0.0588096	0.0189455
	B7HVI3	0	0	0	0	0	0	0	0	0.0187361	0	0	0	0	0	0.0202384	0.111028	0	0
hpt	B7HPX5	0	0	0	0	0	0	0	0	0.0247229	0	0	0	0	0	0.660953	0.338089	0.0207782	0
	B7HR09	0	0	0	0.0808745	0.085025	0.0806174	0.177681	0.176772	0.256061	0	0	0	0	0	0	0.00603736	0	0
cysK1	B7HPX9	0	0	0	0	0	0	0	0	0	0	0	0	0	0	0.0860671	0.191979	0	0
	B7HT96	0	0	0	0.190266	0.142879	0.108378	0.0421526	0.0792146	0.059351	0	0	0	0.294529	0.219821	0.480823	0.349002	0.399049	0.404944
	B7HXZ1	0	0	0	0.503053	0.473199	0.527846	0.561156	0.570996	0.358439	0	0	0	0	0.107062	0.0562034	0.11859	0.116612	0.0939165
plC	B7HW98	0	0	0	0.529912	0.70567	0.605701	0.155228	0.175026	0.3317	0	0	0	0	0	0	0.0210979	0	0
ald1	B7HV97	0	0	0	0	0	0	0.0146987	0.0165733	0.0248349	0	0	0	0	0	0	0.0127358	0	0
ahpC	B7HT24	0	0	0	0.1105	0.0871279	0.198267	0.0285608	0.0966103	0.217154	0	0	0	0.44901	1.34047	1.25101	0.717655	1.15587	0.979902
	B7HRP3	0	0	0	0.0129756	0.0272831	0.0310425	0.0268305	0.0226893	0.0453329	0	0	0	0	0	0.100996	0.120112	0	0
pepF2	B7HZ70	0	0	0	0	0	0	0.00430041	0	0.00363299	0	0	0	0	0	0.00588642	0.0248408	0.116026	0.182955
	B7HT76	0	0	0	0.0307034	0.0645583	0.0489693	0.0714231	0.0536883	0.120677	0	0	0	0	0	0.0977644	0.12377	0.0225382	0.0544551
	B7HLU0	0	0	0	0.322773	0.490154	0.571993	0.454213	0.564403	0.344565	0	0	0	0	0	0	0.0535451	0	0
	B7HUX4	0	0	0	0.0382938	0.0201295	0.0610753	0.217751	0.234363	0.183957	0	0	0	0	0	0	0.0228694	0.02811	0.0135835
pdhC	B7HMU0	0	0	0	0	0	0	0	0	0.0108646	0	0	0	0.0673942	0	0.0352071	0.107716	0.0182621	0.0176494
	B7HNH8	0	0	0	0.144619	0.0675739	0.140956	0.132906	0.112392	0.210523	0	0	0	0	0	0	0.00959642	0	0
chi36	B7HKT0	0	0	0	0.262148	0.183734	0.185824	0.2108	0.254663	0.0636016	0	0	0	0.789056	1.23671	0.226714	0.0608832	0.438319	0.413281
bfmbC	B7HNS6	0	0	0	0.0225315	0.0236878	0.0269518	0.0349423	0.0459652	0.0442789	0	0	0	0.0610372	0.0911097	0.135516	0.114376	0.388678	0.335677
	B7HKG8	0	0	0	0	0	0	0	0	0	0	0	0	0	0.0700486	0.0367729	0.0517274	0.292473	0.270371
	B7I1I2	0	0	0	0.0180272	0.0379048	0.0383358	0.0714456	0.0525376	0.0498604	0	0	0	0.195341	0.194389	0.0425196	0.021532	0.149975	0.204626
	B7HY80	0	0	0	0	0	0.0522059	0.0338417	0.0190789	0.0571791	0	0	0	0	0	0.648519	0.508255	0.240279	0.208996
rnj	B7HMU8	0	0	0	0	0	0	0	0	0	0	0	0	0	0	0.0130989	0.0718609	0	0
	B7HR33	0	0	0	0	0	0	0.00749892	0.00845533	0.0063351	0	0	0	0	0	0.11291	0.142945	0	0
	B7HZW9	0	0	0	0	0	0	0	0	0	0	0	0	0.0916156	0.068377	0.119651	0.0807887	0.49651	0.443863
	B7HXS2	0	0	0	0.989419	0.780147	0.769293	0.703271	0.749713	0.583322	0	0	0	0	0	0.157523	0.184653	0	0
rocF	B7HQY7	0	0	0	0.0532343	0.0373109	0.0424521	0.0550379	0.0827432	0.0697441	0	0	0	0.28842	0.143508	0.477129	0.333816	0.586159	0.541316
rnj	B7HLD1	0	0	0	0	0	0	0	0	0	0	0	0	0	0	0.0930167	0.0897215	0.00689261	0.0199841
	B7HMC1	0	0	0	0	0	0	0	0	0.0108028	0	0	0	0	0.100027	0	0	1.05318	0.947647
	B7HNR1	0	0	0	0	0	0	0	0	0.0378392	0	0	0	0	0	0.153274	0.172485	0.0636034	0.0614695
	B7HNC2	0	0	0	0.241275	0.234146	0.236808	0.211073	0.194721	0.324208	0	0	0	0	0	0	0.00554198	0	0
guaB	B7HPS4	0	0	0	0	0	0	0	0	0	0	0	0	0	0	0.0617746	0.0814656	0	0
sufD	B7HUX1	0	0	0	0	0	0	0	0	0	0	0	0	0	0	0.103687	0.102098	0	0
pdhA	B7HMU2	0	0	0	0.027606	0.0290228	0.0220146	0.0285413	0.0321814	0.0180838	0	0.411309	0	0.299135	0.223259	0.15627	0.164865	0.202645	0.264393
fba2	B7HY95	0	0	0	0	0.0196059	0.0446149	0.00964031	0.0108698	0.0651532	0	0	0	0	0	0.131957	0.233882	0	0
	A1BYI3	0	0	0	3.66376	3.11353	2.70257	2.38321	1.97533	1.82667	0.975234	1.51632	2.26898	0.165417	0	0.388866	0.373788	0	0
	B7HRX1	0	0	0	0.0178482	0	0.0355829	0.106104	0.0780239	0.0935342	0	0	0	0	0	0.0189438	0.023983	0	0.00633107
	B7HN21	0	0	0	0.0927152	0.153173	0.190122	0	0	0.161959	0	0	0	0	0	0	0.00395502	0	0
pbpC	B7HQ34	0	0	0	0	0.016436	0	0.0565717	0.0182248	0.0887562	0	0	0	0	0	0	0.0373462	0	0
	B7HQ30	0	0	0	0	0	0	0	0	0	0	0	0	0	0	0	0	0.222372	0.370537
	B7HQQ4	0	0	0	0	0	0	0	0	0.00550994	0	0	0	0	0	0.0089276	0.0527444	0.23154	0.259575
	B7HMW0	0	0	0	0.571057	0.473972	0.527297	1.61584	1.59419	1.03692	0	0	0	0.651358	0.607674	0.127602	0	0	0
	B7HZX3	0	0	0	0.264624	0.278204	0.281368	0.218871	0.22622	0.292762	0	0	0	0	0	0.037449	0.0210714	0	0
	B7HMT8	0	0	0	0	0	0	0.0134467	0.00758084	0.00567989	0	0	0	0	0	0	0	0.334154	0.359851
calY	B7I0I7	0	0	0	0.738505	0.776405	0.652025	0.804428	0.860904	0.656545	2.94867	2.88178	2.28679	2.14349	2.66631	0.503896	0.173266	0.851884	0.6549
	B7HSM4	0	0	0	0	0	0	0	0	0	0	0	0	0	0	0.0674265	0.130076	0	0
	B7HRU3	0	0	0	0	0	0	0.124678	0.118952	0.0810215	0	0	0	0	0	0	0	0.0068094	0.00658095
	B7HQ49	0	0	0	0.0950381	0.0666104	0.138946	0.466725	0.507786	0.380455	0	0	0	0	0	0	0.023649	0	0
	B7HLD8	0	0	0	0.0121648	0.0127891	0.0291027	0.0188654	0.014181	0.02125	0	0	0	0	0	0.180762	0.159828	0.232173	0.276164
	B7HUG8	0	0	0	0.0431864	0.0363222	0.0413272	0.116089	0.145998	0.101844	0	0	0	0.140389	0.209557	0.0366699	0.00773738	0.0317015	0.0428931
	B7HKV6	0	0	0	0.615922	0.584358	0.467212	0.48924	0.577906	0.413311	0	0	0	0	0	0.0425191	0.0628008	0	0
	B7HTY1	0	0	0	0	0	0	0.028658	0.021542	0.0387365	0	0.0367104	0	0	0	0	0	0	0.0104879
	B7HUF7	0	0	0	0.076897	0.0485061	0	0.0477013	0.0537851	0.0134327	0	0	0.19049	1.08322	1.05721	0.184999	0	0.880576	0.665551
	B7HXT3	0	0	0	0.572114	0.410764	0.478492	0.367882	0.406668	0.286412	0.22286	0.415809	0.172835	0.226806	0.507827	0.138232	0.029167	0.0512155	0.0692961
	B7HZM0	0	0	0	0.469428	0.35024	0.386424	0.289634	0.326573	0.205005	0.241847	0	0	0	0	0.0750045	0.108521	0.0333473	0.0537143
pepQ2	B7HRQ5	0	0	0	0.0421492	0.0443123	0.0448162	0.0581029	0.0163783	0.0429497	0	0	0	0	0	0.258478	0.218156	0.0103134	0
	B7HK59	0	0	0	0.0172785	0.00908262	0.0275577	0.0401937	0.0201422	0.0226371	0	0	0	0.0468069	0.0698684	0.0550174	0.09029	0.177569	0.232901
yqiS	B7HNS9	0	0	0	0	0	0	0.0187145	0.0105507	0.039525	0	0	0	0	0	0.384247	0.25404	0.531497	0.47514
	B7HKF5	0	0	0	0.304939	0.371883	0.330719	0.252216	0.220397	0.314282	0	0	0	0	0	0.0863087	0.131121	0	0
	B7HXT0	0	0	0	0	0	0	0.00686447	0	0.0173973	0	0	0	0	0	0.150338	0.174468	0.0877287	0.0565236
	B7HKM1	0	0	0	0.169666	0.187762	0.192271	0.175414	0.145738	0.136491	0	0	0	0	0	0.0315932	0.0533295	0	0
	B7HRL0	0	0	0	0.101194	0.0303965	0.0345849	0.0448383	0.0674093	0.0315662	0	0.143593	0	0.783236	0.643022	0.358021	0.228786	0.944454	0.840977
	B7HR56	0	0	0	0.189114	0.142014	0.15081	0.139658	0.0787347	0.129781	0	0	0.501937	1.17098	1.14707	0.16249	0.00806715	1.53695	1.28414
	B7HSN1	0	0	0	0.0146057	0	0	0.030201	0.00851321	0.0446493	0	0	0	0.395664	0.236242	0.268706	0.222427	0.761224	0.766771
pta	B7HYE8	0	0	0	0.0494581	0	0.0262938	0.0511337	0.048046	0.0215989	0	0	0	0.178641	0.199992	0.291634	0.255985	0.254137	0.280698
	B7HNL7	0.363139	0.928741	0	0.197095	0.196849	0.196468	0.188489	0.195297	0.215184	0.15739	0.0978855	0.122061	0	0	0.20222	0.205986	0.00723398	0
bioA	B7HNN6	0	0	0	0	0	0.00875012	0.0226885	0.00639556	0.0143755	0	0	0	0	0.0887384	0.163045	0.186757	0.434944	0.38143
sipU	B7HVV0	0	0	0.43302	1.33337	1.48941	1.41774	1.14879	1.1172	0.934102	0	0	0	0	0	0.373461	0.298612	0	0
glmS	B7HQZ1	0	0	0	0	0	0	0	0	0.0151971	0	0	0	0	0	0.0554028	0.0753357	0.0191585	0.0185157
trpE	B7I0E7	0	0	0	0	0	0	0	0	0	0	0	0	0	0	0.0979095	0.111241	0	0
	B7HRT9	0	0	0	0	0	0.00750421	0.145935	0.131638	0.0739716	0	0	0	0	0	0.00665855	0	0.0276306	0.0467313
	B7HVE6	0	0	0	0	0	0	0.00974856	0.0219838	0	0	0	0	0	0	0	0	0.969016	0.775962
	B7HV61	0	0	0	0.0415863	0.0710459	0.0663265	0.0214976	0.0181795	0.0703746	0	0	0	0	0	0	0.00155223	0	0
serC	B7HXT1	0	0	0	0	0	0	0.00733884	0	0.0123997	0	0	0	0	0	0.180818	0.10598	0.354323	0.43308
	B7HZ83	0	0	0	0	0	0	0	0	0	0	0	0	0	0	0.179879	0.18378	0.0982148	0.14238
pyn2	B7HN65	0	0	0	0	0	0	0.012801	0	0.0162215	0	0	0	0	0	0.122655	0.181162	0	0
	B7HT51	0	0	0	0	0	0.0309783	0.311259	0.271709	0.279917	0	0	0	0.105234	0	0.0137437	0	0.78418	0.716533
pepD	B7HS50	0	0	0	0	0	0	0	0	0	0	0	0	0	0	0.0668702	0.112877	0.277487	0.297975
pepF	B7HZE4	0	0	0	0	0	0	0	0	0.0107952	0	0	0	0	0	0	0.029525	0.145164	0.175367
	B7HKE8	0	0	0	0	0	0	0	0	0	0	0	0	0	0	0.0267776	0.0536758	0.159731	0.288609
	B7HV39	0	0	0	0.917741	0.96484	0.819245	0.665599	0.558875	0.490516	0	0.680282	0.508978	0.742129	1.27394	0.261692	0.126795	0.291592	0.369267
	B7HV21	0	0	0	0.338396	0.375528	0.314832	0.281832	0.449271	0.0246302	0	0	0	0	0	0	0	0	0
gpmI	B7HW53	0	0	0	0.0406545	0.0213704	0.0243151	0.0420318	0.0296203	0.0443856	0	0	0	0.220263	0.123295	0.158217	0.185129	0.290968	0.281206
	B7HXX6	0	0	0	0.088385	0.111505	0.12687	0.155345	0.144247	0.142815	0	0	0	0	0	0	0.0448666	0.006488	0
sufC	B7HUX2	0	0	0	0	0	0	0	0	0.00860093	0	0	0	0	0	0.278717	0.370499	0.0144572	0
pdhB	B7HMU1	0	0	0	0.146131	0.0853504	0.103585	0.0839344	0.0662476	0.0567263	0	0.161278	0.40222	0.26391	0.525249	0.448071	0.227873	0.584022	0.610504
	B7HXZ6	0	0	0	0.0891078	0.163942	0.177649	0.817624	0.74012	0.535072	0	0	0	0.120695	0	0	0	0	0
rocD	B7HZS5	0	0	0	0	0.0139114	0.0105522	0	0	0	0	0	0	0	0	0.177898	0.244975	0.0971333	0.112649
	B7HUS0	0	0	0	0	0	0	0	0	0.0273806	0	0	0	0	0	0.199638	0.266783	0.0460236	0.0667193
	B7HYH6	0	0	0	0.0882437	0.0309241	0.0234568	0.068425	0.0171449	0.0256913	0	0	0	0.318733	0.47577	0.312202	0.294241	0.917664	0.907744
fabF	B7HZV1	0	0	0	0.0130936	0.0137656	0.0104416	0.0270745	0.0152638	0.0343088	0	0	0	0	0	0.250153	0.269777	0.0768923	0.148625
	B7HSP1	0	0	0	0	0.0117278	0.00889588	0.0115332	0.0065021	0.014615	0	0	0	0	0	0.0710405	0.166551	0.155585	0.197849
ptsI	B7HN26	0	0	0	0	0	0	0	0	0.015916	0	0	0	0	0	0.0709176	0.127871	0	0
uvrA	B7HWZ3	0	0	0	0	0	0	0	0	0	0	0	0	0	0	0	0.0625735	0.00394423	0
dat1	B7HQ50	0	0	0	0	0	0	0.00866968	0	0	0	0	0	0.0908651	0	0.106804	0.0550873	0.800219	0.820964
rpoC	B7HQT7	0	0	0	0	0	0	0	0	0	0	0	0	0	0	0.00602333	0.0381278	0.00312433	0.012078
rpsA	B7HL08	0	0	0	0	0	0	0	0	0.00592995	0	0	0	0	0	0.220987	0.202732	0	0
	B7HWB4	0.93759	0.479584	0.475954	0.173019	0.149799	0.162324	0.215709	0.195763	0.168897	0.162547	0.707647	0.882422	0.441133	0.658476	0.331272	0.291751	0.328723	0.476542
	B7HKD9	0	0	0	0	0	0	0.0167321	0.00943303	0.0424058	0	0	0.200453	0.0876827	0.0654417	0.435156	0.367273	0.166318	0.218145
trpS	B7HZV4	0	0	0	0	0	0	0	0	0	0	0	0	0	0	0.351869	0.366582	0	0
	B7HXD0	0	0	0	0.103029	0.121856	0.164323	0.233012	0.277743	0.354328	0	0	0	0	0	0.0364512	0.0730667	0	0
thiO	B7HWF2	0	0	0	0	0	0.011055	0.0143325	0.00808025	0.0242163	0	0	0	0	0	0.274658	0.206975	0.152643	0.186861
ampS	B7HSY9	0	0	0	0.0252437	0	0.0100654	0.0521978	0.0514982	0.055121	0	0	0	0	0	0.187553	0.207291	0.648564	0.689486
fumC	B7HMF4	0	0	0	0	0	0.00905993	0.0117459	0.006622	0.0446534	0	0	0	0	0	0.241169	0.268003	0	0
	B7HYE0	0	0	0	0	0.0342694	0.129972	0.522364	0.465489	0.384352	0	0	0	0	0.131809	0.0576624	0.0194669	0.287134	0.265939
	B7HLQ3	0	0	0	0	0	0	0	0	0	0	0	0	0	0	0	0	0.434181	0.572935
	B7HYW2	0	0	0	0	0	0	0	0	0.0064376	0	0	0	0.0798664	0.059608	0.135599	0.123249	0.800745	0.669302
nadC	B7HQI7	0	0	0	0	0	0	0	0.0109695	0.0164377	0	0	0	0	0	0.479404	0.36528	0.11052	0.320435
asnS	B7HRK0	0	0	0	0	0	0	0	0	0	0	0	0	0	0.0436453	0.168022	0.132142	0.221847	0.145488
prsA	B7HZH5	0	0	0	0.246349	0.277491	0.294679	0.300177	0.246153	0.268958	0	0	0	0	0	0.0996081	0.283735	0.0387504	0.0249669
gap2	B7HW56	0.294554	0.376666	0.49842	0	0	0.0254979	0.0247929	0.00931834	0.0488719	0.255329	0.317593	0	0	0.064646	0.350679	0.563306	0.0234709	0.0226834
secA	B7HX16	0	0	0	0	0	0	0	0	0	0	0	0	0	0	0.0255586	0.0844884	0	0
	B7HZK2	0	0	0	0.0266053	0.0139854	0.0265208	0.0756434	0.0736604	0.0813319	0	0.0660666	0	0.0720731	0.0806872	0.0611834	0.0675279	0.0732373	0.0990923
	B7HNC0	0	0	0	0.24409	0.240578	0.218982	0.236587	0.204517	0.519659	0	0	0	0	0	0.0107947	0.0546646	0	0
asd	B7HLD4	0	0	0	0.0450892	0.0316021	0.0479422	0.108772	0.0876037	0.0787638	0	0	0	0.488581	0.364651	0.499839	0.359035	1.12534	1.00228
nheC	B7HMQ4	0	0	0	0.875004	0.844507	0.789289	0.533891	0.560178	0.50741	0	0	0	0	0	0.111649	0.111365	0	0
	B7I070	0	0.353996	0.468421	1.14188	1.01094	0.958529	0.924262	1.01587	0.846432	0.239961	0.149239	0	0.0814034	0.12151	0.0531569	0.0179458	0	0
ald2	B7HRR5	0	0	0	0.142614	0.104953	0.102356	0.125329	0.0831254	0.149475	0	0	0	0.154535	0	0.252281	0.259769	0.554844	0.566581
	B7HXS3	1.18467	0.504971	1.0023	1.54316	1.89274	1.58952	1.52896	1.51159	0.889191	0.342302	0.851551	0.265467	0.116121	0	0	0.00639989	0.0157329	0
	B7HSL7	0	0	0	0.0820931	0.0575374	0.0763766	0.0919472	0.0877242	0.0776771	0	0.135903	0	0.518905	0.553261	0.329167	0.290074	0.87379	0.873594
	B7HYP3	0	0	0	0.953736	0.700286	0.676056	0.876487	0.855915	0.654511	0.24178	0.75185	0.375017	0	0	0.0642718	0.103971	0	0
valS	B7HQL5	0	0	0	0	0	0	0.00290753	0	0.017194	0	0	0	0	0	0.00397984	0.0688594	0.0412873	0.0877847
guaA	B7HS06	0	0	0	0	0	0	0.0359068	0.00578376	0.0476679	0	0	0	0	0	0.182555	0.234078	0.0582722	0.0633568
ahpF	B7HT23	0	0	0	0.0104329	0.0438734	0.0249594	0.0107864	0.00608103	0.0911235	0	0	0	0	0	0.236231	0.236764	0.214435	0.207241
	B7HT32	0	0	0	0.281955	0.226678	0.224847	0.325802	0.319019	0.369398	0	0	0	0.0898596	0	0.539846	0.401154	0.206972	0.0941309
trxB	B7HWY4	0	0	0	0.032998	0	0.0131572	0.0597029	0.0288503	0.0864635	0	0	0	0	0	0.350236	0.285746	0.0968902	0.105344
	A1BZ18	0	0	0	0	0	0	0	0	0.0116617	0	0	0	0.0723392	0.10798	0.179504	0.183397	0.862491	0.890387
	B7HN00	0	0	0	0.136658	0.0862031	0.0980813	0.197804	0.10355	0.185009	0	0.271481	0.169266	1.03657	0.60786	0.425472	0.338696	0.993125	1.07615
	B7HNI4	0	0	0	0.00908766	0.00955405	0.014494	0.234889	0.286034	0.170653	0	0	0	0	0.14699	0.0321517	0	0.400254	0.386826
tkt2	B7HKP7	0	0	0	0	0	0	0	0	0.0345122	0	0	0	0	0	0.111838	0.193503	0.0174033	0.0280324
purB	B7HS28	0	0	0	0	0.0120269	0	0.0118274	0.0133359	0.0349713	0	0	0	0	0.0462588	0.210462	0.273278	0.117566	0.129853
	B7HLT9	0	0	0	0.0594679	0.212568	0.218146	0.252079	0.284229	0.30645	0	0	0	0	0	0.00841578	0.0568235	0	0
metS	B7HPU9	0	0	0	0	0	0	0	0	0.00331842	0	0	0	0	0	0.0268837	0.133871	0.00557789	0.0161723
	B7HLC6	0	0	0	0.522373	0.470727	0.464178	0.555501	0.61765	0.43018	0	0.148247	0	1.2938	1.20703	0.306261	0.245115	0.876466	0.804708
	B7HVI8	0	0	0	0.406669	0.437482	0.452512	0.278668	0.242547	0.280851	0	0	0	0	0	0.0200759	0.0141201	0	0
	B7HVH2	0	0	0	0.428915	0.305986	0.342041	0.30091	0.267859	0.33783	0	0	0	0	0	0.0270979	0.0526025	0	0
	B7HVC5	0	0	0	0.0663489	0.0558032	0.0740745	0.0685967	0.00773455	0.0521555	0	0	0	0.14379	0.0536585	0.394362	0.31303	0.321447	0.338905
	B7HX75	2.41372	0.881883	0.875207	1.59078	1.79047	1.49245	1.01583	0.98176	1.35673	0.896696	1.11536	1.62264	0.101397	0.151355	1.01968	0.815905	0.164856	0.106217
	B7HYH7	0.181385	0.463899	0.306925	0.315031	0.341549	0.282627	0.274813	0.327077	0.219264	0.15723	0.684503	0.365812	0.0533382	0	0.0348302	0.0117587	0.0289066	0.0698419
gapN	B7HXL3	0	0	0	0	0	0	0	0	0.00482103	0	0	0	0	0	0.218718	0.230749	0.40518	0.375923
htrA	B7I048	0	0	0	0.573899	0.493652	0.499265	0.552887	0.638607	0.455687	0	0	0	0	0	0.193813	0.120737	0	0
purA	B7HZF4	0	0	0	0.0481429	0.0253068	0.0287939	0.149322	0.119259	0.105123	0	0	0	0.195626	0.243342	0.289556	0.262356	0.697962	0.734315
argS	B7HYC4	0	0	0	0	0	0	0	0	0.0119875	0	0	0	0	0	0.0388461	0.172128	0	0
	B7HX53	0	0	0	0.0604331	0.0635346	0.0832421	0.164721	0.160112	0.134358	0	0	0	0.178594	0.133293	0.0310995	0.0147646	0.112921	0.132518
mmgE	B7HR27	0	0	0	0	0	0	0.0443149	0	0.0561559	0	0	0	0.116114	0	0.00758231	0.00319975	0.755134	0.821024
	B7HX67	0	0	0	0.389709	0.319573	0.329423	0.314271	0.386154	0.377822	0	0	0	0	0	0.0220603	0.0442201	0	0
	B7HQR5	0	0	0	0	0	0	0	0	0.0027593	0	0	0	0	0	0.022354	0.105654	0	0
	A1BYH7	0	0	0	0.114636	0.0964152	0.100559	0.361485	0.541224	0.260326	0	0	0	0.993744	1.25158	0.462356	0.290961	1.0098	1.04911
	B7HZW5	0	0	0	0	0.00546897	0.00414837	0.0699171	0.0485134	0.0454354	0	0	0	0.253657	0.462773	0.136193	0.0357268	0.152744	0.225119
acnA	B7I062	0	0	0	0.011561	0.0182315	0.0322679	0.0926332	0.0505391	0.0782566	0	0	0	0	0	0.0572631	0.120825	0.00848648	0.00820176
	B7HW17	0	0	0	0.740933	0.596649	0.603433	0.831229	0.799414	0.722877	0.503551	0.313173	0	0.341645	0.446225	0.836612	0.729639	0.104149	0.0782872
	B7HL78	0	0	0	0.0387512	0.02037	0.0309024	0.0600961	0.0169402	0.0465385	0	0	0	0.104976	0.0783484	0.116535	0.13307	0.583139	0.597939
	B7HPH3	0	0	0	0.107975	0.16649	0.206652	0.130238	0.109088	0.188615	0	0	0	0	0	0	0.00859778	0	0
	B7HYB9	0	0	0	0.577173	0.392631	0.406121	0.66693	0.771779	0.281712	0.180746	0.224822	0.280349	1.96209	2.05932	0.472465	0.243312	0.639674	0.473696
	B7HYP2	0.163837	0.209509	0	0.062246	0.0467432	0.0354561	0.0919355	0.0725626	0.108734	0	0	0	0	0	0.0629209	0.140729	0	0
	B7HYB8	0	0	0	0.00152919	0.00160767	0.00365839	0.00632399	0.00623923	0.0160275	0	0	0	0	0	0.00324612	0.0251142	0.00336756	0.0119335
	B7HMR5	0	0	0	0	0	0	0.0424916	0.0273777	0.0358969	0	0	0	0.254483	0.237416	0.265887	0.269992	1.03438	1.1163
katB	B7HZT0	0	0	0	0.143293	0.139886	0.122432	0.132274	0.0954526	0.143034	0.163466	0.508323	0.507095	1.5527	1.36579	0.434539	0.492059	1.43503	1.24893
sph	B7HW99	0	0	0	1.58429	1.30635	1.33772	1.18833	1.21314	1.19383	0	0	0	0	0	0.0989141	0.143778	0	0
	B7HKS1	2.87395	1.22504	2.43153	2.79039	2.7696	2.61221	2.74157	2.61644	3.07297	4.42885	2.92658	2.36137	0.281705	0.420499	0.343383	0.243238	0.127225	0.147548
	B7HML0	0	0	0	0.00935856	0.00983885	0.0149261	0.0435403	0.0327289	0.0572178	0	0	0	0	0	0.0728423	0.181643	0.0412186	0.0796714
	B7HQC7	0	0	0	1.73152	1.61234	1.39396	1.33838	1.31683	1.12346	0	0	0	0	0	0.116686	0.167422	0	0
	B7HQ08	0	0	0	0.282985	0.154263	0.158803	0.70434	0.80028	0.338708	1.00434	4.58063	4.80323	6.01921	5.76385	1.31267	0.215945	1.50026	2.14143
	B7HNA1	12.7665	15.7208	11.4013	1.82209	2.21238	2.11816	1.02151	0.897498	2.15182	2.66414	1.402	2.22506	0.0695208	0	0.635566	0.528756	0.0659343	0
	B7HX52	0	0	0	0.119889	0.116347	0.139733	0.371853	0.349399	0.265812	0	0	0	0	0.0372917	0.00652558	0.0385532	0.0880062	0.117766
	B7HXQ9	0	0	0	0.393183	0.541647	0.55141	0.511634	0.410934	0.296047	0	0	0	0	0	0	0.0323879	0	0
pdhD	B7HMT9	0	0	0	0.185167	0.158169	0.175349	0.233317	0.188874	0.166783	0	0.114952	0	0.627014	0.60836	0.442199	0.407775	0.433257	0.402301
nheB	B7HMQ3	8.0657	9.06396	5.16974	2.20211	2.42669	2.36966	0.692615	0.703629	1.88282	0.847467	0	0.32862	0	0	0.563201	0.439692	0.0194757	0
	B7I031	0	0	0	0.0089433	0	0.0142638	0.106332	0.114681	0.109358	0	0	0	0.0969085	0	0.00632819	0	0.177253	0.253787
gltX	B7HQS2	0	0	0	0.0411399	0.0108128	0.00820182	0.0212668	0	0.0404241	0	0	0	0	0	0.160106	0.337825	0.00754981	0.029186
glnA	B7HKQ9	0	0	0	0.3193	0.275742	0.272815	0.247588	0.159523	0.169322	0.364253	1.01943	0.84747	2.34778	2.16727	0.806904	0.885338	1.97554	2.08724
	B7HKU2	0	0	0.250459	1.0765	1.08107	1.2941	1.65284	1.61079	1.31212	0.513217	1.75552	0.995042	1.82807	1.68922	0.636661	0.527748	0.306651	0.136783
	B7HNS8	0	0	0	0.617208	0.437619	0.457857	0.385839	0.384851	0.300884	0	1.5683	1.77785	3.26623	2.6699	1.15784	0.900073	1.60155	1.48672
	B7I098	0	0	0	0.0922428	0.106674	0.0809155	0.29564	0.263451	0.213502	0.294642	0.641363	0.228505	1.4993	1.38009	0.234972	0.0495793	0.616178	0.628225
typA	B7HME1	0	0	0	0	0	0	0	0	0.0108557	0	0	0	0	0	0.164166	0.259794	0	0
	B7HX69	6.17566	7.45851	6.38608	0.986937	1.25294	1.12116	0.548692	0.537267	0.862013	2.82533	1.84964	2.53711	0.050445	0.112948	0.520466	0.50878	0.116189	0.0528428
	B7HXE6	0	0	0	0.647059	0.589564	0.550401	1.167	1.05602	0.860292	0	0	0	0	0	0.0305235	0.111635	0	0
	B7HLU1	0	0	0	0.177146	0.384113	0.432627	0.194594	0.271038	0.430323	0	0	0	0	0	0.0705073	0.158689	0	0
pyk	B7HRN8	0	0	0	0	0	0	0.0047467	0	0.0761904	0	0	0	0	0	0.26639	0.636115	0.599894	0.638396
cpdB	B7HNP0	0	0	0	0.203754	0.262581	0.28828	0.30919	0.226031	0.284167	0	0.261143	0	0.0712211	0.0797334	0.153476	0.276732	0.0964955	0.153876
nheA	B7HMQ2	12.0465	16.0209	11.4151	5.11296	6.0215	6.37153	3.23795	4.1311	6.72721	9.18926	2.72765	1.61968	0.141697	0.21151	1.98012	2.12417	0.451155	0.037108
eag	B7HXP5	1.38226	1.76759	1.26693	0.181304	0.236618	0.254266	0.229461	0.258726	0.223882	1.59758	1.80087	1.00667	0.0677446	0.151683	0.0442377	0	0.100964	0.141929
alo	B7HXW4	3.58875	6.0384	3.67551	1.36346	1.34722	1.25081	0.545845	0.484004	1.15506	0.163729	0.101828	0.126977	0	0	0.253888	0.333668	0	0
pepF1	B7I0A6	0	0	0	0.0406894	0.0342221	0.0259584	0.0504815	0.0379466	0.0497546	0	0.0808322	0	0.83772	0.658136	0.155474	0.14337	1.36798	1.40868
	B7HXG3	0	0	0	0.263963	0.363406	0.315749	0.37687	0.348008	0.225062	0.100375	0.249705	0.155688	0.306458	0.432033	0.151201	0.0600536	0.161471	0.178347
	A1BYI0	2.72571	2.61417	1.87372	0.989342	1.19565	1.06177	0.611804	0.770673	0.795469	0	0.0918409	0.114524	0	0	0.124308	0.129765	0	0
	B7I030	0	0	0	0	0.00936592	0.00710432	0.0782896	0.0726967	0.058358	0	0	0	0.0482669	0.216143	0.0189112	0	0.712811	0.644655
	B7HLW0	6.06615	5.05905	10.2646	2.46216	2.69387	2.26027	2.13118	2.3279	1.43159	1.37174	2.55937	0.70922	0	0.115769	0.54697	0.53431	0.031524	0.0101555
	B7HWA6	4.72474	5.75414	5.71058	2.18582	1.97705	1.71388	1.54656	1.60146	1.86648	4.68063	3.39619	3.47874	0.0661599	0.0493782	0.630762	0.776669	0.0448191	0
	B7HX23	5.94644	2.53471	4.52793	1.90419	2.08109	1.76731	1.02328	0.990756	1.39067	4.98274	2.8852	2.39852	0	0.0435023	0.426293	0.55575	0.0236915	0
	B7HND4	4.81484	4.92566	5.49942	4.05057	4.09361	3.76157	1.86425	1.45465	4.14272	2.29551	0.389358	0.485522	0.0707927	0.158508	0.961545	0.928596	0.0671406	0.00926972
	B7HRU2	0	0	0	0.551658	0.40303	0.484662	1.18903	1.24803	0.837078	0	0.371494	0.115811	0.303951	0.30247	0.0860088	0.106096	0.350042	0.298499
	B7HXP4	0.842181	1.23081	0.712535	0.372207	0.425635	0.395759	0.411822	0.47957	0.239543	0	0	0	0	0	0	0	0.00958677	0.0231628
	B7HTG8	3.21267	1.51357	1.85976	1.87217	2.02614	2.01259	1.57505	1.51917	1.53901	0.879426	0.27347	0.341012	0.0497221	0.0371099	0.168838	0.175384	0.0269469	0
	B7HVG2	0	0	0	0.318378	0.316625	0.329374	0.524884	0.571765	0.420875	0	0.0854702	0.319739	2.37764	2.29647	0.292257	0.0411109	1.29487	1.36131
	B7HZV6	0.341665	0.655365	0.578137	0.788119	0.740835	0.658066	1.20785	1.28624	0.911065	1.777	3.2234	2.18202	1.0047	1.16228	0.413328	0.514969	0.367535	0.315737
	B7HVA4	0	0	0	1.66325	1.35344	1.21396	3.01658	3.63136	1.22291	9.00466	9.42711	13.734	12.3716	11.7413	3.31127	2.12691	5.29758	6.11315
	B7HVW7	0	0	0	1.54618	1.20067	1.15594	1.96641	2.12503	1.28908	3.22705	2.70509	2.93794	1.80869	3.01953	0.57811	0.0760746	0.219259	0.261762
	B7HV59	0	0	0	0.156616	0.308061	0.294105	0.216766	0.256191	0.465532	0	0.150546	0	0	0.0612871	0.0857958	0.176504	0.0333771	0.0465938
	B7HVL4	0	0	0	0.347148	0.289217	0.297729	0.237016	0.263427	0.188789	2.61524	2.86263	3.65077	2.69704	2.22481	0.505181	0.377478	0.745252	0.738836
	B7I0J0	0.9726	0.621865	0.822877	0.897399	0.915706	0.784043	0.869814	0.730755	0.599383	6.53387	3.99807	5.47588	6.00607	4.69606	0.7844	0.240382	1.56937	1.45586
	B7HXE3	10.8225	3.91114	14.1328	5.60577	5.83977	5.20354	6.12574	4.98675	6.69743	11.8285	6.46866	5.85201	1.45286	0.671257	0.713805	1.18584	0.149977	0.0362362
inhA	B7HW94	4.3137	8.27433	4.96757	1.59987	1.82556	1.61294	1.0422	1.16375	0.999739	6.02435	5.81387	6.60536	1.65608	1.28861	0.561424	0.893311	0.200508	0.161484
	B7I033	0.164709	0	0	0.79563	0.714282	0.677254	1.11372	1.16719	0.823754	1.42775	2.13111	3.43254	7.60422	7.62743	1.19554	0.493842	3.60924	3.59597
	B7HRI9	0.50584	0.905593	0.513565	0.41731	0.865909	0.740013	0.525118	0.524881	1.07188	0.701565	1.25443	0.952153	1.01148	1.2656	0.345794	0.619773	0.673123	0.662227
pyc	B7HMD1	0	0	0	0	0	0	0.00230243	0	0.0116706	0	0	0	0	0	0.0504253	0.391012	0.0882761	0.101113
	B7HK52	0	0	0	0.46758	0.706209	0.735247	0.643427	0.587301	0.730509	0.736255	3.00905	0.897271	0.142722	0.479342	0.214357	0.234013	0.0870167	0.0747532
