# Supplementary material for: Bacillus cereus Decreases NHE and CLO Exotoxin Synthesis to Maintain Appropriate Proteome Dynamics During Growth at Low Temperature
Source: Toxins (Basel). 2020 Oct 6;12(10):645. doi: 10.3390/toxins12100645 (PMC7601483; doi:10.3390/toxins12100645)
Supplement: Supplementary file 1 [file toxins-12-00645-s001.zip › Table S4.xlsx]

## Sheet: Table S4
Table S4 :Classification of exoproteins using Hierarchical Clustering on Principal components
Results of HCPC clustering
Cluster 1 (859 proteins)			Cluster 2 (28)	Cluster 3 (12)	Cluster 4 (1)
CL1-1	CL1-2	CL1-3	CL2	CL3	CL4
A1BYI1	B7HQT4	B7HXS3	B7HSW8	A1BYH8	B7HVA4
A1BYI2	B7HXS5	B7HXP5	B7HW52	B7HKS1
A1BYI4	B7HY36	B7HXW4	B7HW54	B7HNA1
A1BYM7	B7HZ62	A1BYI0	B7HYP0	B7HMQ3
A1BYM9	B7HUD6	B7HTG8	B7HKU8	B7HX69
A1BYQ6	B7HRJ0		B7HYC0	B7HMQ2
A1BYQ7	B7HV44		A1BYH6	B7HLW0
A1BYQ8	B7HZD0		B7HZ63	B7HWA6
A1BYS9	B7I0I5		B7HT24	B7HX23
A1BYU6	B7HTK2		A1BYI3	B7HND4
A1BYW0	B7HXZ1		B7I0I7	B7HXE3
A1BYZ8	B7HLU0		B7HR56	B7HW94
A1BYZ9	B7HKT0		B7HLC6
B7HK64	B7HXS2		B7HX75
B7HK66	B7HMW0		A1BYH7
B7HK75	B7HKV6		B7HYB9
B7HK77	B7HUF7		B7HZT0
B7HK95	B7HXT3		B7HQ08
B7HKA8	B7HRL0		B7HKQ9
B7HKD1	B7HVV0		B7HKU2
B7HKE6	B7HV39		B7HNS8
B7HKF7	B7HMU1		B7HVG2
B7HKI1	B7HXZ6		B7HZV6
B7HKJ1	B7HYH6		B7HVW7
B7HKL0	B7HWB4		B7HVL4
B7HKQ3	B7HLD4		B7I0J0
B7HKR8	B7HMQ4		B7I033
B7HKU6	B7I070		B7HRI9
B7HKX2	B7HSL7
B7HKX8	B7HYP3
B7HKY5	B7HT32
B7HL03	B7HN00
B7HL06	B7HYH7
B7HL18	B7I048
B7HL21	B7HW17
B7HL46	B7HW99
B7HL48	B7HQC7
B7HL63	B7HXQ9
B7HL90	B7HMT9
B7HLB2	B7I098
B7HLB3	B7HXE6
B7HLB5	B7I0A6
B7HLD3	B7HXG3
B7HLE0	B7HRU2
B7HLE6	B7HXP4
B7HLE9	B7HK52
B7HLF0
B7HLF2
B7HLF7
B7HLF9
B7HLG0
B7HLG1
B7HLG3
B7HLG5
B7HLG9
B7HLH2
B7HLH3
B7HLH7
B7HLI3
B7HLI5
B7HLJ9
B7HLK4
B7HLL7
B7HLL8
B7HLL9
B7HLM0
B7HLM2
B7HLM9
B7HLU5
B7HLU6
B7HLV2
B7HLV3
B7HLW1
B7HLY2
B7HLZ4
B7HM20
B7HM21
B7HM33
B7HM35
B7HM38
B7HM42
B7HMC0
B7HMC3
B7HMC8
B7HMD4
B7HME3
B7HME6
B7HMF9
B7HMJ0
B7HML2
B7HML3
B7HMM2
B7HMN9
B7HMP7
B7HMP9
B7HMQ9
B7HMV1
B7HMV2
B7HMV8
B7HMX7
B7HN32
B7HN35
B7HN41
B7HN67
B7HNA7
B7HNC3
B7HND3
B7HND7
B7HNH4
B7HNI1
B7HNL4
B7HNM6
B7HNM8
B7HNM9
B7HNN1
B7HNN3
B7HNN7
B7HNQ4
B7HNS3
B7HNS7
B7HNT8
B7HNU4
B7HNU5
B7HNU6
B7HNW0
B7HNW2
B7HNW6
B7HNY9
B7HNZ0
B7HNZ1
B7HP06
B7HP29
B7HP35
B7HP68
B7HP99
B7HPF6
B7HPG3
B7HPI4
B7HPK2
B7HPK7
B7HPL3
B7HPL4
B7HPN2
B7HPP7
B7HPP8
B7HPR8
B7HPS6
B7HPS7
B7HPS8
B7HPT5
B7HPT6
B7HPU3
B7HPV8
B7HPV9
B7HPW0
B7HPW4
B7HPW8
B7HPX2
B7HPX8
B7HPY8
B7HQ02
B7HQA3
B7HQD1
B7HQD7
B7HQE4
B7HQF3
B7HQF5
B7HQF6
B7HQG0
B7HQG5
B7HQG7
B7HQG8
B7HQJ2
B7HQK2
B7HQL0
B7HQL2
B7HQM1
B7HQM2
B7HQN2
B7HQN3
B7HQN8
B7HQP4
B7HQS1
B7HQS4
B7HQT1
B7HQT2
B7HQT3
B7HQT6
B7HQU0
B7HQU1
B7HQU2
B7HQU3
B7HQU4
B7HQU5
B7HQU6
B7HQU7
B7HQU8
B7HQU9
B7HQV2
B7HQV4
B7HQV5
B7HQV6
B7HQV8
B7HQW0
B7HQW2
B7HQW3
B7HQW5
B7HQW6
B7HQW7
B7HQW9
B7HQX0
B7HQX7
B7HQX8
B7HQZ0
B7HQZ7
B7HQZ8
B7HR23
B7HR52
B7HR96
B7HRB1
B7HRD2
B7HRF8
B7HRG0
B7HRI4
B7HRK2
B7HRL1
B7HRL3
B7HRL4
B7HRM8
B7HRN2
B7HRN9
B7HRQ4
B7HRX6
B7HRY1
B7HRY4
B7HRZ1
B7HRZ4
B7HS04
B7HS05
B7HS29
B7HS31
B7HS32
B7HS33
B7HS36
B7HS46
B7HS58
B7HS87
B7HSD0
B7HSF8
B7HSH9
B7HSI0
B7HSJ2
B7HSK7
B7HSM3
B7HSM8
B7HSM9
B7HSQ3
B7HSR0
B7HSS7
B7HSV6
B7HSV7
B7HSW5
B7HSY0
B7HSY1
B7HT18
B7HT21
B7HT33
B7HT62
B7HT69
B7HT70
B7HT71
B7HT74
B7HT92
B7HTE5
B7HTI9
B7HTM6
B7HTN6
B7HTP9
B7HTQ2
B7HTQ4
B7HTS9
B7HTX1
B7HTY0
B7HTY6
B7HU08
B7HU44
B7HU66
B7HU71
B7HU72
B7HU74
B7HU83
B7HUA0
B7HUD5
B7HUG0
B7HUG1
B7HUI5
B7HUJ7
B7HUK9
B7HUQ7
B7HUQ8
B7HUR2
B7HUR5
B7HUS7
B7HUS8
B7HUU2
B7HUU3
B7HUV3
B7HUY1
B7HV01
B7HV37
B7HV41
B7HV45
B7HV47
B7HV50
B7HV70
B7HV83
B7HVB7
B7HVC0
B7HVD8
B7HVH4
B7HVH9
B7HVK6
B7HVT6
B7HVU3
B7HVV1
B7HVY1
B7HVZ3
B7HVZ6
B7HVZ8
B7HVZ9
B7HW02
B7HW46
B7HW55
B7HW92
B7HWA9
B7HWF3
B7HWF4
B7HWF6
B7HWI8
B7HWW2
B7HX13
B7HX28
B7HX62
B7HX91
B7HX97
B7HX99
B7HXA5
B7HXC9
B7HXK5
B7HXL6
B7HXM4
B7HXU0
B7HXU1
B7HXV0
B7HXX7
B7HY06
B7HY46
B7HY64
B7HY65
B7HY67
B7HY76
B7HY78
B7HY82
B7HY85
B7HY91
B7HY96
B7HY98
B7HY99
B7HYA3
B7HYA4
B7HYC6
B7HYC9
B7HYD4
B7HYD6
B7HYE9
B7HYF2
B7HYF9
B7HYG2
B7HYG5
B7HYM5
B7HYP7
B7HYP9
B7HYS5
B7HYS8
B7HYT2
B7HYX3
B7HYX7
B7HYY0
B7HYZ0
B7HYZ7
B7HZ01
B7HZ13
B7HZ18
B7HZ26
B7HZ49
B7HZ50
B7HZ78
B7HZ82
B7HZB0
B7HZC1
B7HZC9
B7HZF1
B7HZF6
B7HZG1
B7HZG2
B7HZI0
B7HZJ8
B7HZJ9
B7HZM9
B7HZQ0
B7HZQ2
B7HZR4
B7HZR5
B7HZT6
B7HZU5
B7HZW0
B7HZX9
B7HZY1
B7HZZ0
B7I044
B7I047
B7I053
B7I090
B7I091
B7I0B0
B7I0B1
B7I0E0
B7I0E9
B7I0F0
B7I0F2
B7I0F3
B7I0H2
B7I0J5
B7I0P8
B7I1K3
B7I1K4
B7I1N1
B7HNG8
B7HMW3
B7HK76
B7HUB3
B7HQ00
B7HRF4
B7HPU8
B7HR86
B7HPJ0
B7HS26
B7HNR9
B7HXF5
B7HR02
B7HVI2
B7HLI4
B7HZV0
B7HXN3
B7HZT7
B7HSR7
B7HV77
B7HL32
B7HN27
B7HM02
B7HWC4
B7HZV9
B7HKY2
B7HUX3
B7HLP1
B7HN19
B7HUW9
B7HTP5
B7HV86
B7HZ66
B7HPZ8
B7HTW5
B7HVC6
B7HPS2
B7HXV3
B7HYW5
B7HKW2
B7HM27
B7HZD9
B7HZQ7
B7HPY3
B7HM50
B7HV49
B7HSI1
B7HSL5
B7HLI9
B7HYW6
B7HPX1
B7HWE7
B7HVX5
B7HZJ6
B7HZF3
B7HZG0
B7HXN7
B7HYE6
B7HKV9
B7HZ07
B7HZL5
B7HLA7
B7HU37
B7HQ32
B7HRG7
B7HRM6
B7HSL4
B7HR47
B7HS11
B7HWJ9
B7HQL3
B7HPH5
B7HN71
B7HY77
B7HK89
B7HPS1
B7HL25
B7HNR8
B7HQ26
B7HPX6
B7HZG9
B7HQZ6
B7HZ42
B7HQD5
B7HXX5
B7I0E8
B7HVK2
B7HS37
B7HUF6
B7HSJ5
B7HKV7
B7HLG8
B7HLJ3
B7HLC1
B7HZQ3
B7HLN0
B7HW68
B7I0K1
B7HRK1
B7HKS5
B7HKT8
B7HYB7
B7HT80
B7HPJ2
B7HVZ2
B7HVE3
B7HQF4
B7HL28
B7HLB7
B7HPS5
B7HMY8
B7HXQ0
B7HR45
B7HX68
B7HNL1
B7HMQ5
B7HQJ1
B7HPC8
B7HN23
B7HV81
B7HRT5
B7HWD7
B7HN68
B7HK99
B7HVZ7
B7HLC2
B7HQV9
B7HKI6
B7HRI8
B7HYF7
B7HKE1
B7HQ70
B7HRN3
B7HKC0
B7HZ54
B7HW01
B7HQY9
B7HQI3
B7HZJ9
B7HQK9
B7HRP7
B7I060
B7HSM7
B7HY45
B7I0I6
B7HLB4
B7HMU5
B7HR48
B7HT11
B7HYF0
B7HQ07
B7HRW3
B7HNE0
B7HX10
B7HNS5
B7HN33
B7HR07
B7HW47
B7HKM6
B7HNU8
B7HZR3
B7HL20
B7HLR5
B7HR46
B7HN40
B7I0D1
B7HV13
A1BYN6
B7HQT0
B7HMJ7
B7HY40
B7HRG6
B7I0F6
B7HRG4
B7HQX1
B7HLX2
B7HZE3
B7HUY2
B7HMJ6
B7HRF7
B7HNU9
B7HX15
B7HQV0
B7HV71
B7HLA8
B7HT95
B7HLD2
B7HT26
B7HQG1
B7HWF0
B7HUK8
B7HSL3
B7HN66
B7HUJ4
B7HVG9
B7HPI9
B7HKD7
B7HTZ4
B7I1J0
B7HUX0
B7HMA6
B7HRG5
B7HLV4
B7HRT7
B7HN99
B7HQD0
B7HRI5
B7HWD8
B7HX98
B7HUW8
B7HQE6
B7HX29
B7HVH3
B7HMM9
B7HRU4
B7HTR5
B7I035
B7HW93
B7HYD0
B7HY93
B7HVK0
B7HX18
B7HQP5
B7HTZ1
B7HUR3
B7HNW1
B7HZQ5
B7HXS9
B7HWQ2
B7HWE6
B7HNS4
B7HY89
B7HVI2
B7HWJ3
B7I036
B7HY87
B7HY44
A1BYZ2
B7HVI3
B7HPX5
B7HR09
B7HPX9
B7HT96
B7HW98
B7HV97
B7HRP3
B7HZ70
B7HT76
B7HUX4
B7HMU0
B7HNH8
B7HNS6
B7HKG8
B7I1I2
B7HY80
B7HLD1
B7HR33
B7HZW9
B7HQY7
B7HMU8
B7HMC1
B7HNR1
B7HNC2
B7HPS4
B7HUX1
B7HMU2
B7HY95
B7HRX1
B7HN21
B7HQ34
B7HQ30
B7HQQ4
B7HZX3
B7HMT8
B7HSM4
B7HRU3
B7HQ49
B7HLD8
B7HUG8
B7HTY1
B7HZM0
B7HRQ5
B7HK59
B7HNS9
B7HKF5
B7HXT0
B7HKM1
B7HSN1
B7HYE8
B7HNL7
B7HNN6
B7HQZ1
B7I0E7
B7HRT9
B7HVE6
B7HV61
B7HXT1
B7HZ83
B7HN65
B7HT51
B7HS50
B7HZE4
B7HKE8
B7HV21
B7HW53
B7HXX6
B7HUX2
B7HZS5
B7HUS0
B7HZV1
B7HSP1
B7HN26
B7HWZ3
B7HQ50
B7HQT7
B7HL08
B7HKD9
B7HZV4
B7HXD0
B7HWF2
B7HSY9
B7HMF4
B7HYE0
B7HLQ3
B7HYW2
B7HQI7
B7HRK0
B7HZH5
B7HW56
B7HX16
B7HZK2
B7HNC0
B7HRR5
B7HQL5
B7HS06
B7HT23
B7HWY4
A1BZ18
B7HNI4
B7HKP7
B7HS28
B7HLT9
B7HPU9
B7HVI8
B7HVH2
B7HVC5
B7HXL3
B7HZF4
B7HYC4
B7HX53
B7HR27
B7HX67
B7HQR5
B7HZW5
B7I062
B7HL78
B7HPH3
B7HYP2
B7HYB8
B7HMR5
B7HML0
B7HX52
B7I031
B7HQS2
B7HME1
B7HLU1
B7HRN8
B7HNP0
B7I030
B7HV59
B7HMD1

## Sheet: Cluster description
Link between the cluster variable and the quantitative variables										Link between the sub_cluster variable and the quantitative variables
================================================================										================================================================
Eta2 P-value										Eta2 P-value
Dim.1 0.78489739 2.245254e-298										Dim.1 0.78723108 1.039439e-287
Dim.2 0.70317500 9.602994e-236										Dim.3 0.34870253 3.046492e-80
Dim.3 0.06518780 4.751551e-13										Dim.2 0.19919301 6.403155e-42
Dim.5 0.02647251 2.435909e-05										Dim.4 0.06839982 7.261442e-14
Dim.4 0.02518355 4.306167e-05										Dim.5 0.01330282 3.284881e-03
Description of each cluster by quantitative variables										Description of each cluster by quantitative variables
=====================================================										=====================================================
Cluster 1										Cluster 1-1
v.test Mean in category Overall mean sd in category Overall sd p.value										v.test Mean in category Overall mean sd in category Overall sd p.value
Dim.5 -2.244841 -0.01174973 -5.945427e-17 0.5576909 0.7183347 2.477835e-02										Dim.4 4.893585 0.05728063 4.514896e-16 0.8396741 1.307746 9.901572e-07
Dim.3 -2.262527 -0.01835671 3.454027e-18 0.4835508 1.1134881 2.366489e-02										Dim.3 4.475006 0.06000736 8.768754e-18 0.5381812 1.498144 7.640912e-06
Dim.2 -6.400436 -0.09587050 -1.572816e-16 0.6774345 2.0557008 1.549335e-10										Dim.2 -8.899335 -0.14787504 2.008717e-16 1.1662388 1.856436 5.618249e-19
Dim.1 -22.381479 -0.52374078 -7.056084e-17 0.8674756 3.2115310 5.963416e-111										Dim.1 -21.704835 -0.52823401 -5.095108e-16 0.7491798 2.719021 1.846864e-104
Cluster2										Cluster 1-2
v.test Mean in category Overall mean sd in category Overall sd p.value										v.test Mean in category Overall mean sd in category Overall sd p.value
Dim.2 13.597575 5.2026038 -1.572816e-16 4.369419 2.0557008 4.139313e-42										Dim.1 16.206090 6.050702 -5.095108e-16 3.904875 2.719021 4.567173e-59
Dim.1 10.621479 6.3488709 -7.056084e-17 3.586135 3.2115310 2.367791e-26										Dim.2 11.427916 2.913144 2.008717e-16 4.926509 1.856436 3.033017e-30
Dim.5 3.060848 0.4092305 -5.945427e-17 2.080450 0.7183347 2.207113e-03										Dim.4 -6.479114 -1.163467 4.514896e-16 2.641039 1.307746 9.226267e-11
Dim.3 -2.237268 -0.4636637 3.454027e-18 1.923513 1.1134881 2.526880e-02										Dim.3 -9.438427 -1.941637 8.768754e-18 3.505328 1.498144 3.784182e-21
Cluster 3										Cluster 1-3
v.test Mean in category Overall mean sd in category Overall sd p.value										v.test Mean in category Overall mean sd in category Overall sd p.value
Dim.1 21.414142 19.730987 -7.056084e-17 9.083862 3.211531 9.864414e-102										Dim.1 19.966156 24.221720 -5.095108e-16 5.206425 2.719021 1.084874e-88
Dim.3 7.345696 2.346683 3.454027e-18 7.845801 1.113488 2.046919e-13										Dim.3 14.648193 9.791193 8.768754e-18 9.012237 1.498144 1.383460e-48
Dim.2 -13.688898 -8.073548 -1.572816e-16 4.083891 2.055701 1.182892e-42										Dim.4 4.193596 2.446853 4.514896e-16 9.499318 1.307746 2.745672e-05
										Dim.5 -3.319902 -1.687300 3.335649e-17 7.532874 1.139119 9.004899e-04
Cluster 4										Dim.2 -6.534354 -5.412285 2.008717e-16 3.489124 1.856436 6.388455e-11
v.test Mean in category Overall mean sd in category Overall sd p.value
Dim.2 16.326513 33.562427 -1.572816e-16 0 2.0557008 6.393529e-60
Dim.1 11.008177 35.353103 -7.056084e-17 0 3.2115310 3.489926e-28
Dim.5 -3.770506 -2.708486 -5.945427e-17 0 0.7183347 1.629168e-04
Dim.4 -4.588745 -4.593076 -6.784696e-18 0 1.0009437 4.459182e-06
